# Supplementary material for: Intrathecal AAV9/AP4M1 gene therapy for hereditary spastic paraplegia 50 shows safety and efficacy in preclinical studies
Source: J Clin Invest. 2023 May 15;133(10):e164575. doi: 10.1172/JCI164575 (PMC10178841; doi:10.1172/JCI164575)
Supplement: Supplemental data set 2 [file jci-133-164575-s059.pdf]

**FINAL REPORT**

**Test Facility Study No. 5550014**

**Sponsor Reference No. UTSW-Gray-SPG50-004**

**A Single-Dose Study of AAV9/AP4M1 by Intrathecal Injection in  
Immunosuppressed Monkeys**

**GLP**

**SPONSOR:**

University of Texas Southwestern Medical Center  
5323 Harry Hines Blvd  
Dallas, TX 75390-9056  
USA

**TEST FACILITY:**

Charles River Laboratories Montreal ULC  
Senneville Site (CR-SEN)  
22022 Transcanadienne  
Senneville, QC H9X 3R3  
Canada

**TABLE OF CONTENTS**

|                                                                              |    |
|------------------------------------------------------------------------------|----|
| LIST OF APPENDICES.....                                                      | 3  |
| QUALITY ASSURANCE STATEMENT .....                                            | 4  |
| COMPLIANCE STATEMENT AND REPORT APPROVAL.....                                | 6  |
| 1. RESPONSIBLE PERSONNEL .....                                               | 7  |
| 2. SUMMARY .....                                                             | 8  |
| 3. INTRODUCTION .....                                                        | 10 |
| 4. MATERIALS AND METHODS.....                                                | 10 |
| 4.1. Test Material Identification.....                                       | 10 |
| 4.2. Immunosuppression Material Identification .....                         | 11 |
| 4.3. Stability .....                                                         | 11 |
| 4.4. Study Design.....                                                       | 11 |
| 4.5. Deviations .....                                                        | 12 |
| 5. COMPUTERIZED SYSTEMS.....                                                 | 14 |
| 6. RETENTION OF RECORDS, SAMPLES, AND SPECIMENS.....                         | 15 |
| 7. RESULTS .....                                                             | 16 |
| 7.1. Mortality .....                                                         | 16 |
| 7.2. Clinical Observations.....                                              | 16 |
| 7.3. Body Weights and Body Weight Gains .....                                | 16 |
| 7.4. Food Evaluation .....                                                   | 16 |
| 7.5. Neurological Evaluation .....                                           | 16 |
| 7.6. Nerve Conductivity Velocity .....                                       | 16 |
| 7.7. Hematology.....                                                         | 18 |
| 7.8. Coagulation .....                                                       | 18 |
| 7.9. Clinical Chemistry .....                                                | 18 |
| 7.10. Urinalysis .....                                                       | 19 |
| 7.11. Cytokine Analysis.....                                                 | 19 |
| 7.12. Tissue Biodistribution, Gene Expression, and Splenocyte Analysis ..... | 19 |
| 7.13. Macroscopic Pathology.....                                             | 21 |
| 7.14. Organ Weights .....                                                    | 21 |
| 7.15. Microscopic Evaluations.....                                           | 22 |
| 8. CONCLUSION.....                                                           | 26 |
| 9. REFERENCES .....                                                          | 27 |

**LIST OF APPENDICES**

|             |                                                          |     |
|-------------|----------------------------------------------------------|-----|
| Appendix 1  | Amended Study Plan and Study Plan.....                   | 28  |
| Appendix 2  | Test and Reference Item Characterization .....           | 108 |
| Appendix 3  | Individual Mortality .....                               | 118 |
| Appendix 4  | Individual Clinical Observations.....                    | 123 |
| Appendix 5  | Individual Body Weights .....                            | 147 |
| Appendix 6  | Individual Body Weight Gains.....                        | 162 |
| Appendix 7  | Individual Neurological Examinations.....                | 177 |
| Appendix 8  | SOP - Neurological Examinations .....                    | 202 |
| Appendix 9  | Nerve Conduction Velocity.....                           | 218 |
| Appendix 10 | Clinical Pathology Report .....                          | 233 |
| Appendix 11 | Biomarker Cytokines Analysis Interpretative Report ..... | 310 |
| Appendix 12 | Bioanalysis Report .....                                 | 400 |
| Appendix 13 | Pathology Report.....                                    | 427 |
| Appendix 14 | Pathology Peer Review .....                              | 488 |

**QUALITY ASSURANCE STATEMENT**

Study Number: 5550014

This Study has been audited by Quality Assurance in accordance with the applicable Good Laboratory Practice regulations. Reports were submitted in accordance with SOPs as follows:

| <b>Date(s) of Audit</b> | <b>Phase(s) Audited</b>                | <b>Dates Findings Submitted to:</b> |                                 |
|-------------------------|----------------------------------------|-------------------------------------|---------------------------------|
|                         |                                        | <b>Study Director</b>               | <b>Test Facility Management</b> |
| 12Jul2021               | Study Plan Amendment 01                | 12Jul2021                           | 12Jul2021                       |
| 12Jul2021               | Dose Preparation                       | 12Jul2021                           | 12Jul2021                       |
| 12Jul2021               | Final Study Plan                       | 12Jul2021                           | 12Jul2021                       |
| 13Jul2021               | Dose Administration                    | 14Jul2021                           | 14Jul2021                       |
| 20Aug2021               | Study Plan Amendment 02                | 20Aug2021                           | 20Aug2021                       |
| 24Sep2021               | Study Plan Amendment 03                | 24Sep2021                           | 24Sep2021                       |
| 14Oct2021               | Neurological Exam                      | 14Oct2021                           | 14Oct2021                       |
| 14Oct2021               | Study Plan Amendment 04                | 14Oct2021                           | 14Oct2021                       |
| 20Oct2021               | Study Plan Amendment 05                | 20Oct2021                           | 20Oct2021                       |
| 06Nov2021               | Data Review - Bioanalysis & Immunology | 06Nov2021                           | 06Nov2021                       |
| 17Nov2021 - 18Nov2021   | Data Review - Bioanalysis & Immunology | 22Nov2021                           | 22Nov2021                       |
| 17Nov2021 - 18Nov2021   | Report Preparation                     | 22Nov2021                           | 22Nov2021                       |
| 17Nov2021 - 19Nov2021   | Phase Report - Biomarkers              | 22Nov2021                           | 22Nov2021                       |
| 18Nov2021               | Data Review - Sample Management        | 22Nov2021                           | 22Nov2021                       |
| 22Nov2021 - 24Nov2021   | Data Review - Animal Care              | 24Nov2021                           | 24Nov2021                       |
| 22Nov2021 - 24Nov2021   | Data Review - Clinical Pathology       | 25Nov2021                           | 25Nov2021                       |
| 22Nov2021 - 24Nov2021   | Data Review - Formulations             | 24Nov2021                           | 24Nov2021                       |
| 22Nov2021 - 24Nov2021   | Data Review - Sample Management        | 24Nov2021                           | 24Nov2021                       |
| 22Nov2021 - 24Nov2021   | Data Review - Technical Operations     | 24Nov2021                           | 24Nov2021                       |
| 22Nov2021 - 24Nov2021   | Data Review - Veterinary Services      | 24Nov2021                           | 24Nov2021                       |
| 24Nov2021               | Report Preparation                     | 24Nov2021                           | 24Nov2021                       |
| 24Nov2021               | Data Review - Necropsy                 | 24Nov2021                           | 24Nov2021                       |
| 24Nov2021               | Data Review - Histology                | 24Nov2021                           | 24Nov2021                       |
| 24Nov2021               | Report Preparation                     | 24Nov2021                           | 24Nov2021                       |

## QUALITY ASSURANCE STATEMENT

Study Number: 5550014

This Study has been audited by Quality Assurance in accordance with the applicable Good Laboratory Practice regulations. Reports were submitted in accordance with SOPs as follows:

| <b>Date(s) of Audit</b> | <b>Phase(s) Audited</b>           | <b>Dates Findings Submitted to:</b> |                                 |
|-------------------------|-----------------------------------|-------------------------------------|---------------------------------|
|                         |                                   | <b>Study Director</b>               | <b>Test Facility Management</b> |
| 24Nov2021               | Data Review - Shipping/Receiving  | 25Nov2021                           | 25Nov2021                       |
| 25Nov2021               | Phase Report - Clinical Pathology | 26Nov2021                           | 26Nov2021                       |
| 26Nov2021               | Phase Report - Pathology          | 26Nov2021                           | 26Nov2021                       |
| 29Nov2021               | Report - Materials and Methods    | 30Nov2021                           | 30Nov2021                       |
| 29Nov2021 - 30Nov2021   | Report - Results                  | 30Nov2021                           | 30Nov2021                       |
| 29Nov2021               | Phase Report - Deviation Log      | 30Nov2021                           | 30Nov2021                       |
| 29Dec2021               | Study Plan Amendment 06           | 29Dec2021                           | 29Dec2021                       |
| 22Feb2022               | Final Phase Report - Biomarkers   | 22Feb2022                           | 22Feb2022                       |
| 23Feb2022 - 24Feb2022   | Final Report                      | 24Feb2022                           | 24Feb2022                       |

In addition to the above-mentioned audits, process-based and/or routine facility inspections were also conducted during the course of this study. Inspection findings, if any, specific to this study were reported by Quality Assurance to the Study Director and Test Facility Management and listed as a Phase Audit on this Quality Assurance Statement.

The Final Report has been reviewed to assure that it accurately describes the materials and methods, and that the reported results accurately reflect the raw data.

All electronic signatures appear at the end of the document upon finalization.

### COMPLIANCE STATEMENT AND REPORT APPROVAL

The study was performed in accordance with the OECD Principles of Good Laboratory Practice and as accepted by Regulatory Authorities throughout the European Union, United States of America (FDA), Japan (MHLW), and other countries that are signatories to the OECD Mutual Acceptance of Data Agreement.

Exceptions from the above regulations are listed below.

- Characterization of the test and reference items was performed by the Sponsor subcontractor according to established SOPs, controls, and approved test methodologies to ensure integrity and validity of the results generated; these analyses were not conducted in compliance with the GLP or GMP regulations.
- Stability testing of the supplied test and reference items was not performed in this study although required by the Study Plan. This had no significant impact due to the known high degree of stability of AAV9 vector under the conditions of this study. ([Bee JS, 2022](#), [Gruntman, 2015](#))
- Concentration and homogeneity of the test and reference item formulations were not determined in this study.
- Tissue bioanalysis, gene expression, and splenocyte analysis was performed by the Sponsor according to established SOPs, controls, and approved test methodologies to ensure integrity and validity of the results generated; these analyses were not conducted in compliance with the GLP regulations.
- Nerve conduction velocity (NCV) assessment was performed using scientifically sound but non-validated methodologies.

This study was conducted in accordance with the procedures described herein. All deviations authorized/acknowledged by the Study Director are documented in the study records. The report represents an accurate and complete record of the results obtained.

There were no deviations from the above regulations that affected the overall integrity of the study or the interpretation of the study results and conclusions.

All electronic signatures appear at the end of the document upon finalization.

**1. RESPONSIBLE PERSONNEL**

| <b>Role/Phase</b>                                          | <b>Quality Assurance Program (QAP)</b> | <b>Name</b>                                                                                                                                                     | <b>Contact Information</b>                                            |
|------------------------------------------------------------|----------------------------------------|-----------------------------------------------------------------------------------------------------------------------------------------------------------------|-----------------------------------------------------------------------|
| Study Director                                             | Charles River                          | Stefania Cinquino, BSc<br>(from study initiation to 11 Jul 2021<br>and from 10 Aug 2021 to end)<br><br>Julie Douville, PhD<br>(from 12 Jul 2021 to 09 Aug 2021) | Address as cited for Test Facility                                    |
| Test Facility Management                                   | Charles River                          | Julie Douville, PhD<br>(from study initiation to 11 Jul 2021<br>and from 10 Aug 2021 to end)<br><br>Kevin Norton, MSc, DSP<br>(from 12 Jul 2021 to 09 Aug 2021) | Address as cited for Test Facility                                    |
| Test Facility QAP                                          | Charles River                          | Nooshin Davani, BSc, RQAP-GLP                                                                                                                                   | Address as cited for Test Facility                                    |
| <b>Individual Scientist (IS)</b>                           |                                        |                                                                                                                                                                 |                                                                       |
| Nerve Conduction Velocity                                  | Charles River                          | Nataliya Sadekova, MSc, DSP                                                                                                                                     | Address as cited for Test Facility                                    |
| Clinical Pathology                                         | Charles River                          | Florence Poitout, DVM, DACVP, DECVCP                                                                                                                            | Address as cited for Test Facility                                    |
| Cytokines                                                  | Charles River                          | Hycham Harouchi, BSc                                                                                                                                            | Address as cited for Test Facility                                    |
| Immuno-toxicology<br>Splenocyte Preparation <sup>a</sup>   | Charles River                          | Philippe Rousseau, PhD                                                                                                                                          | Address as cited for Test Facility                                    |
| Pathology                                                  | Charles River                          | Elaine Debien, DVM, DES, MSc, DACVP                                                                                                                             | Address as cited for Test Facility                                    |
| <b>Principal Investigator (PI)</b>                         |                                        |                                                                                                                                                                 |                                                                       |
| Tissue Biodistribution Analysis (Bioanalysis) <sup>b</sup> | N/A                                    | Steven Gray, PhD                                                                                                                                                | University of Texas<br>Southwestern Medical Center<br>Dallas, TX, USA |
| Tissue Gene expression Analysis <sup>b</sup>               | N/A                                    |                                                                                                                                                                 |                                                                       |
| Splenocyte Analysis <sup>b</sup>                           | N/A                                    |                                                                                                                                                                 |                                                                       |

<sup>a</sup> No formal report for this phase.<sup>b</sup> Sponsor.

## 2. SUMMARY

The objectives of this study were to determine the potential toxicity, biodistribution, and gene expression of AAV9/AP4M1, for the treatment of Spastic Paraplegia Type 50 (SPG50) caused by the AP4M1 gene mutation, when given by a single intrathecal injection to monkeys, to evaluate the potential reversibility and/or progression of any findings, and to determine the potential impact of immunosuppressant (IMS) on the toxicity profile of this AAV9 vector.

The study design was as follows:

Text Table 1  
Experimental Design

| Group No. | Test Material               | Dose Level (vg)       | Dose Volume (mL) | Dose Concentration (vg/mL) | No. of Animals |         |
|-----------|-----------------------------|-----------------------|------------------|----------------------------|----------------|---------|
|           |                             |                       |                  |                            | Main Study     |         |
|           |                             |                       |                  |                            | Males          | Females |
| 1         | Reference Item <sup>a</sup> | 0                     | 1                | 0                          | 1              | 1       |
| 2         | AAV9/AP4M1                  | $8.4 \times 10^{13}$  | 1.55             | $5.43 \times 10^{13}$      | -              | 2       |
| 3         | AAV9/AP4M1                  | $1.68 \times 10^{14}$ | 3.10             | $5.43 \times 10^{13}$      | 1              | 1       |

<sup>a</sup> PBS containing 5% D-sorbitol and 0.001% Pluronic F-68.

The following parameters and endpoints were evaluated in this study: mortality, clinical observations, body weights, appetite, neurological examinations, nerve conduction velocity (NCV) evaluation, clinical pathology parameters (hematology, coagulation, clinical chemistry, and urinalysis), cytokines analysis, tissue bioanalysis and gene expression, splenocyte analysis, organ weights, and macroscopic and microscopic examinations.

There was no mortality during the course of the study.

There were no AAV9/AP4M1-related clinical observations, or effects on body weights, appetite, hematology, clinical chemistry, or urinalysis parameters, IL-6, IL-10, TNF- $\alpha$ , MCP-1, and IP-10 levels, macroscopic findings, or organ weights.

Clinical pathology results revealed equivocal mild increases in fibrinogen concentration in both animals administered  $1.68 \times 10^{14}$  vg on Days 52 and 94. These increases may have been associated with microscopic necrosis/inflammation observed in the biceps femoris at injection sites, however due to the higher magnitude observed in AAV9/AP4M1-dosed animals, this change remains of an uncertain relationship to AAV9/AP4M1.

There were AAV9/AP4M1-related increases in IL-8 noted in females at  $\geq 8.4 \times 10^{13}$  vg. Due to its low magnitude, this change was considered nonadverse.

Administration of AAV9/AP4M1 at  $1.68 \times 10^{14}$  vg resulted in notable microscopic findings consisting of an increase in the severity of degeneration (axonal and neuronal) in multiple tissues of the central and peripheral nervous system in animals at  $1.68 \times 10^{14}$  vg, which manifested into neurological findings. Degenerative changes were confirmed with Fluoro-Jade B (FJB), and associated with IBA-1, and/or GFAP staining, which were performed on the lumbar spinal cord (including injection site) and lumbar dorsal root ganglion (DRG) sections. Due to the nature of these findings, the axonal and neuronal degeneration were considered adverse. The remaining microscopic changes (perivascular vacuolation of macrophages and mononuclear cell infiltration) at  $\geq 8.4 \times 10^{13}$  vg were considered nonadverse due to their low severity and that they were generally not directly associated with the neuronal/axonal degeneration.

At the injection site, axonal degeneration of the cauda equina was seen at  $1.68 \times 10^{14}$  vg in both sexes, while axonal degeneration of the dorsal funiculus and perivascular vacuolation of macrophages were seen in the male only. Perivascular infiltrates of mononuclear cells were noted in females at  $\geq 8.4 \times 10^{13}$  vg. In the spinal cord, axonal degeneration of the dorsal funiculus was seen in all three segments and considered AAV9/AP4M1-related at  $1.68 \times 10^{14}$  vg in both sexes.

In the lumbar dorsal root ganglion (DRG), mononuclear cell infiltrates occurred at  $\geq 8.4 \times 10^{13}$  vg in both sexes, and neuronal degeneration was noted at  $1.68 \times 10^{14}$  vg in both sexes. In the dorsal lumbar nerve root, there was axonal degeneration at  $1.68 \times 10^{14}$  vg in both sexes, and mononuclear cell infiltrates in females at  $\geq 8.4 \times 10^{13}$  vg. Mononuclear cell infiltrates also occurred in the dorsal thoracic nerve root in the male at  $1.68 \times 10^{14}$  vg.

In the brain, axonal degeneration of the medulla oblongata was noted in the male at  $1.68 \times 10^{14}$  vg, and an increase in the severity of meningeal mononuclear cell infiltrates in both females at  $8.4 \times 10^{13}$  vg.

In the trigeminal ganglion, there was axonal degeneration and mononuclear cell infiltrates in the male at  $1.68 \times 10^{14}$  vg.

In the peripheral nerves (sciatic, sural, and tibial), there was an increase in severity of axonal degeneration at  $1.68 \times 10^{14}$  vg in both sexes, most likely exacerbated by the edema/inflammation associated with experimental procedures (repetitive intramuscular injections). The degeneration in the nerves correlated with a decrease in nerve conduction velocity and response amplitude of the sural nerve noted on Day 45, 77 and 92; these changes were more prominent in the male, which was also noted with neurological findings of abnormal general attitude and motor function and decreased proprioceptive positioning in the left hindlimb on Day 94.

AAV9/AP4M1 resulted in delivery of AP4M1 vector DNA across the central nervous system (CNS) and peripheral organs. The AP4M1 vector DNA was widely detected at high levels in multiple brain regions. In the peripheral organs, even higher amounts of AP4M1 DNA persisted in the liver and to a lesser extent in other organs tested. Consistent with this AP4M1 DNA biodistribution data, AP4M1 transgene expression was also widely detected at high level in multiple CNS and peripheral tissues.

In conclusion, administration of AAV9/AP4M1 by a single intrathecal injection in monkeys at  $8.4 \times 10^{13}$  and  $1.68 \times 10^{14}$  vg was well tolerated. Adverse findings at  $1.68 \times 10^{14}$  vg included axonal or neuronal degeneration noted microscopically in the spinal cord (including the injection site), lumbar DRG, dorsal nerve roots, brain, trigeminal ganglion, and peripheral nerves (sciatic, sural, and tibial), with associated decreases in nerve conduction velocity and neurological effects. Based on these results, the no-observed-adverse-effect level (NOAEL) was considered to be  $8.4 \times 10^{13}$  vg.

Furthermore, it was concluded that AAV9 delivered intrathecally can achieve broad distribution as well as expression across the nervous system and peripheral organs without generating any immune response under the immunosuppressant regimen, although the level of gene transfer in the brain is sub-saturating with a minority of cells receiving the transgene.

### 3. INTRODUCTION

The objectives of this study were to determine the potential toxicity, biodistribution, and gene expression of AAV9/AP4M1, for the treatment of Spastic Paraplegia Type 50 (SPG50) caused by the AP4M1 gene mutation, when given by a single intrathecal injection to monkeys, to evaluate the potential reversibility and/or progression of any findings, and to determine the potential impact of immunosuppressant (IMS) on the toxicity profile of this AAV9 vector.

Study Initiation Date: 29 Jun 2021  
 Initiation of Dosing: 13 Jul 2021  
 Completion of In-life: 14 Oct 2021  
 Experimental Starting Date: 30 Jun 2021  
 Experimental Completion Date: Signature date of the Pathology Report

### 4. MATERIALS AND METHODS

The study was conducted in accordance with the Study Plan and last Amended Study Plan presented in [Appendix 1](#) with the following requirements and exceptions provided in the sections below.

#### 4.1. Test Material Identification

Text Table 2  
Test Item Identification

|                                         | Test Item                                                          |
|-----------------------------------------|--------------------------------------------------------------------|
| Identification:                         | AAV9/AP4M1<br>( <a href="#">Appendix 2</a> )                       |
| Alternate Identification:               | rAAV9.AP4M1                                                        |
| Batch No.:                              | T-GEMINIS-033                                                      |
| Expiration/Retest Date:                 | Not available                                                      |
| Physical Description:                   | Colorless, clear to slightly opalescent, free of visible particles |
| Concentration (Based on ddPCR Results): | 5.43E13 vg/mL                                                      |
| Storage Conditions:                     | Set to maintain -80°C                                              |
| Provided by:                            | Sponsor                                                            |

Text Table 3  
Test Material Identification

|                           | Reference Item/Vehicle                                                                  |
|---------------------------|-----------------------------------------------------------------------------------------|
| Identification:           | PBS containing 5% D-sorbitol and 0.001% Pluronic F-68<br>( <a href="#">Appendix 2</a> ) |
| Alternate Identification: | 1XdPBS, 5% sorbitol, 0.001% pluronico FMR-T-0043.01                                     |
| Batch No.:                | 2021-02-09/01                                                                           |
| Expiration/Retest Date:   | Not available                                                                           |
| Storage Conditions:       | Set to maintain -80°C                                                                   |
| Provided by:              | Sponsor                                                                                 |

## 4.2. Immunosuppression Material Identification

Text Table 4  
Immunosuppression (IMS) Identification

|                                                          | IMS 1                        | IMS 2                      | IMS 3                                    |
|----------------------------------------------------------|------------------------------|----------------------------|------------------------------------------|
| <b>Identification:</b>                                   | Methylprednisolone succinate | Methylprednisolone acetate | Rapamycin                                |
| <b>Alternate Identification:</b>                         | Solu-Medrol                  | Depo-Medrol                | N/A                                      |
| <b>Physical Description:</b>                             | Liquid                       | Liquid                     | Powder                                   |
| <b>Concentration:</b>                                    | 125 mg/mL                    | 40 mg/mL                   | N/A                                      |
| <b>Storage Conditions (Temperature Set to Maintain):</b> | 21°C<br>Protected from light | 21°C                       | -20°C                                    |
| <b>Provided by:</b>                                      | Test Facility                | Test Facility              | Test Facility                            |
| <b>Supplier:</b>                                         | McKesson Canada              | Zoetis Canada or Pfizer    | Toronto Research Chemicals or Alfa Aesar |

N/A = Not applicable.

Text Table 5  
Immunosuppressants Vehicle Identification

|                                                          | Vehicle for Solu-Medrol             | Vehicle Components for Rapamycin |          |                     |
|----------------------------------------------------------|-------------------------------------|----------------------------------|----------|---------------------|
| <b>Identification:</b>                                   | 0.9% sodium chloride injection, USP | N,N-Dimethylacetamide            | Tween-80 | Polyethylene Glycol |
| <b>Storage Conditions (Temperature Set to Maintain):</b> | 21°C                                | 21°C                             | 21°C     | 21°C                |
| <b>Provided by:</b>                                      | Test Facility                       | Test Facility                    |          |                     |

## 4.3. Stability

For the time periods covered by the parameters of this study, stability was demonstrated for all samples related to cytokine samples.

## 4.4. Study Design

Text Table 6  
Experimental Design

| Group No. | Test Material               | Dose Level (vg)       | Dose Volume (mL) | Dose Concentration (vg/mL) | Animal Numbers |            |
|-----------|-----------------------------|-----------------------|------------------|----------------------------|----------------|------------|
|           |                             |                       |                  |                            | Main Study     |            |
|           |                             |                       |                  |                            | Males          | Females    |
| 1         | Reference Item <sup>a</sup> | 0                     | 1                | 0                          | 1201           | 1701       |
| 2         | AAV9/AP4M1                  | 8.4x10 <sup>13</sup>  | 1.55             | 5.43x10 <sup>13</sup>      | -              | 2701, 2702 |
| 3         | AAV9/AP4M1                  | 1.68x10 <sup>14</sup> | 3.10             | 5.43x10 <sup>13</sup>      | 3201           | 3701       |

<sup>a</sup> PBS containing 5% D-sorbitol and 0.001% Pluronic F-68.

Text Table 7  
Additional Study Plan Deliverables

|                                                  |                                                                                                                                     |
|--------------------------------------------------|-------------------------------------------------------------------------------------------------------------------------------------|
| <b>Animal Source:</b>                            | Charles River Laboratories, Frederick, MD, USA                                                                                      |
| <b>Age at Initiation of Dosing</b>               | 3 to 4 years old                                                                                                                    |
| <b>Body Weight Range at Initiation of Dosing</b> | 3.1 – 3.2 kg males<br>2.6 – 3.4 kg females                                                                                          |
| <b>Supplemental Diet</b>                         | Animals received half of their morning and afternoon pellets in juice and an extra portion of fruit and vegetables on Days -2 to 2. |
| <b>Additional Enrichment</b>                     | Additional enrichment items were provided throughout the study                                                                      |
| <b>Number of Acclimation days</b>                | 13                                                                                                                                  |

None of the following study events had an adverse impact on the study or the interpretation of the data unless otherwise indicated.

Text Table 8  
Study Events

| <b>Event</b>                                                                                                                                                                                                                                                                                                                                                                                                                                                                                                                                                                                                                                                                                             |
|----------------------------------------------------------------------------------------------------------------------------------------------------------------------------------------------------------------------------------------------------------------------------------------------------------------------------------------------------------------------------------------------------------------------------------------------------------------------------------------------------------------------------------------------------------------------------------------------------------------------------------------------------------------------------------------------------------|
| <ul style="list-style-type: none"> <li>On Days 28 to 35, Female No. 2702 received the antibiotic trimethoprim sulfamethoxazole (TMS) orally once daily due to redness, swelling, and a skin lesion with discharge on the left hindlimb. A swab of the lesion was sent to Idexx laboratories for bacterial testing which came back positive for staphylococcus aureus and leclercia.</li> <li>On occasion, reflux and/or spillage was noted during the rapamycin administration for some animals. Since these occurrences were observed on occasion for animals in each group and were considered minor, they did not have an impact on the overall immunosuppressant exposure of the animals.</li> </ul> |

#### 4.5. Deviations

All deviations that occurred during the study have been authorized/acknowledged by the Study Director, assessed for impact, and documented in the study records. All Study Plan deviations and any SOP deviations that could have impacted the quality or integrity of the Study are listed below.

None of the deviations were considered to have impacted the overall integrity of the study or the interpretation of the study results and conclusions.

Text Table 9  
Deviations

| <b>Formulations and Dosing</b> |                                                                                                                |                                                                                                                                                                       |
|--------------------------------|----------------------------------------------------------------------------------------------------------------|-----------------------------------------------------------------------------------------------------------------------------------------------------------------------|
| <b>Study Plan Section No.</b>  | <b>Deviation</b>                                                                                               | <b>Impact</b>                                                                                                                                                         |
| 7.1                            | The Solu-Medrol supplier indicated in the Study Plan was Pfizer, however it was received from McKesson Canada. | The Solu-Medrol used on study was from an appropriate supplier.                                                                                                       |
| 7.1                            | Tween 80 and Rapamycin were not stored protected from light, although indicated in the Study Plan.             | It is not a requirement to have stored these individual components protected from light, however, the rapamycin solution was stored in amber glass vials as intended. |

| <b>Formulations and Dosing</b>                             |                                                                                                                                                                                                                                                                         |                                                                                                                                                                                                                                       |
|------------------------------------------------------------|-------------------------------------------------------------------------------------------------------------------------------------------------------------------------------------------------------------------------------------------------------------------------|---------------------------------------------------------------------------------------------------------------------------------------------------------------------------------------------------------------------------------------|
| <b>Study Plan Section No.</b>                              | <b>Deviation</b>                                                                                                                                                                                                                                                        | <b>Impact</b>                                                                                                                                                                                                                         |
| 10.3.1                                                     | On Day 1, the 0.5-mL Abbocath® flush with 0.9% sodium chloride was not administered to Male No. 3201 following the immunosuppression administration of methylprednisolone succinate.                                                                                    | Based on the relatively minimal dead volume of the Abbocath® (approximately 0.3 mL), this had no impact as the animal received within 20% of its intended dose volume.                                                                |
| <b>Husbandry</b>                                           |                                                                                                                                                                                                                                                                         |                                                                                                                                                                                                                                       |
| <b>Study Plan Section No.</b>                              | <b>Deviation</b>                                                                                                                                                                                                                                                        | <b>Impact</b>                                                                                                                                                                                                                         |
| 8.                                                         | The origin of the spare animal and Female No. 3701 was Chinese instead of Vietnamese.                                                                                                                                                                                   | This had no impact on the study objectives as these animals were considered suitable for use on the study.                                                                                                                            |
| 8.3                                                        | As per study plan, at least 2 weeks should have been allowed between animal transfer and the start of dosing, however, 13 days of acclimation was provided.                                                                                                             | The acclimation provided to the animals was considered sufficient.                                                                                                                                                                    |
| 8.4                                                        | Animals in Groups 1 and 3 were randomly assigned to treatment groups instead of being assigned as pre-established pairs using a computerized based randomization procedure, as indicated in the Study Plan.                                                             | The animal identification list assigning these animals was signed by the study director prior to placement in groups. Furthermore, bodyweights were evenly distributed among groups and all animals were considered suitable for use. |
| <b>In-life Observations, Measurements, and Evaluations</b> |                                                                                                                                                                                                                                                                         |                                                                                                                                                                                                                                       |
| <b>Study Plan Section No.</b>                              | <b>Deviation</b>                                                                                                                                                                                                                                                        | <b>Impact</b>                                                                                                                                                                                                                         |
| 11.                                                        | General in-life assessments were not performed on the spare animal aside from bodyweight and detailed examinations until the animal was released. Additionally, on Days 35 and 94, the bodyweight measurement (Day 35 only) or detailed examination were not performed. | No impact as the spare was not used on the study.                                                                                                                                                                                     |
| 11.                                                        | On occasion, the afternoon mortality check was not performed.                                                                                                                                                                                                           | There was no impact on the welfare of the animals; animals were verified at other occasions on the same day and the following day.                                                                                                    |
| 11.                                                        | On Day 13, the food evaluation was not performed.                                                                                                                                                                                                                       | Sufficient data were collected on the study to allow for potential effects on appetite.                                                                                                                                               |
| <b>Postmortem and Pathology</b>                            |                                                                                                                                                                                                                                                                         |                                                                                                                                                                                                                                       |
| <b>Study Plan Section No.</b>                              | <b>Deviation</b>                                                                                                                                                                                                                                                        | <b>Impact</b>                                                                                                                                                                                                                         |
| 14.5                                                       | There was no weight recorded for the thymus of Female No. 1701. Furthermore, the tissue for this animal was lost following fixation.                                                                                                                                    | No impact on pathology evaluation as the organ weight change present in the thymus was seen across dose groups, including the control male, and was considered not related to the administration of AAV9/AP4M1.                       |
| 15.1                                                       | The tongue was omitted in the list of tissues to undergo histology processing; therefore the tissue was not prepared to slide for any animal.                                                                                                                           | No impact on pathology evaluation as this tissue was not to be examined microscopically.                                                                                                                                              |

| <b>Formulations and Dosing</b>                                                                                                              |                                                                                                                                                                                                                                                                                                                                                                                                          |                                                                                                                                                                                                                       |
|---------------------------------------------------------------------------------------------------------------------------------------------|----------------------------------------------------------------------------------------------------------------------------------------------------------------------------------------------------------------------------------------------------------------------------------------------------------------------------------------------------------------------------------------------------------|-----------------------------------------------------------------------------------------------------------------------------------------------------------------------------------------------------------------------|
| <b>Study Plan Section No.</b>                                                                                                               | <b>Deviation</b>                                                                                                                                                                                                                                                                                                                                                                                         | <b>Impact</b>                                                                                                                                                                                                         |
| <b>Retention and Disposition of Records, Samples, and Specimens</b>                                                                         |                                                                                                                                                                                                                                                                                                                                                                                                          |                                                                                                                                                                                                                       |
| <b>Study Plan Section No.</b>                                                                                                               | <b>Deviation</b>                                                                                                                                                                                                                                                                                                                                                                                         | <b>Impact</b>                                                                                                                                                                                                         |
| 21                                                                                                                                          | The prestudy/predose serum and CSF samples will be shipped to the Sponsor following finalization of the study, as the CITES permit renewals will not be received prior to scheduled finalization. Furthermore, Watson cannot be archived prior to finalization until samples are shipped. Watson and any documentation generated will be archived following sample shipment and confirmation of receipt. | No impact as samples will nonetheless be shipped and any records archived.                                                                                                                                            |
| <b>SOP</b>                                                                                                                                  |                                                                                                                                                                                                                                                                                                                                                                                                          |                                                                                                                                                                                                                       |
| <b>Deviation</b>                                                                                                                            |                                                                                                                                                                                                                                                                                                                                                                                                          | <b>Impact</b>                                                                                                                                                                                                         |
| The dose volume was not adjusted to compensate for the dead volume of the spinal needle (0.1 mL for pencil point type needles), as per SOP. |                                                                                                                                                                                                                                                                                                                                                                                                          | Based on the minimal volume difference, animals received their intended dose volume.                                                                                                                                  |
| <b>Planned Deviations</b>                                                                                                                   |                                                                                                                                                                                                                                                                                                                                                                                                          |                                                                                                                                                                                                                       |
| <b>Study Plan Section No.</b>                                                                                                               | <b>Deviation</b>                                                                                                                                                                                                                                                                                                                                                                                         | <b>Impact</b>                                                                                                                                                                                                         |
| 10.3                                                                                                                                        | Due to the animal transfer date and start of dosing, a planned deviation was issued for the administration of rapamycin to be started on Day -13, however, a discrepancy was noted in this deviation and should have stated Day -12 instead. Furthermore, the spare animal was also administered rapamycin.                                                                                              | The duration of rapamycin treatment was considered sufficient to allow for immunosuppressant effect; it was started on the intended day. In addition, the spare animal was treated should any replacements be needed. |
| 13.3                                                                                                                                        | A planned deviation was issued to address the discrepancy in the storage of the prestudy CSF samples; samples were to be collected on dry ice instead of wet ice.                                                                                                                                                                                                                                        | Dry ice was the appropriate storage condition for this type of sample.                                                                                                                                                |

## 5. COMPUTERIZED SYSTEMS

Critical computerized systems used in the study are listed below or presented in the appropriate Phase Report. All computerized systems used in the conduct of this study have been validated; when a particular system has not satisfied all requirements, appropriate administrative and procedural controls were implemented to assure the quality and integrity of data.

Text Table 10  
Critical Computerized Systems

| System Name                                                                 | Version No.      | Description of Data Collected and/or Analyzed                                                                                                                                                   |
|-----------------------------------------------------------------------------|------------------|-------------------------------------------------------------------------------------------------------------------------------------------------------------------------------------------------|
| Provantis®                                                                  | 10               | In-life; clinical pathology; postmortem; Test Material receipt, accountability, and/or formulation activities.                                                                                  |
| M-Files®                                                                    | 21               | Reporting and collection of 21 CFR Part 11 compliant signature                                                                                                                                  |
| DocuSign™                                                                   | Part 11          | Collection of 21 CFR Part 11 compliant signature                                                                                                                                                |
| eInfotree                                                                   | 7                | Excel Module for data collection with 21 CFR Part 11 compliance requirements, security, audit trail, and electronic signatures.                                                                 |
| AcqKnowledge                                                                | 4                | Electrophysiological recording                                                                                                                                                                  |
| Softmax Pro GxP                                                             | 5.4.6            | Cytokine data collection                                                                                                                                                                        |
| Bio Plex Manager (Bio-Rad)                                                  | 6.1              | Cytokine data collection                                                                                                                                                                        |
| Watson LIMS                                                                 | 7.6.1 HF3        | Cytokine data analysis and sample management                                                                                                                                                    |
| SRS (CR-SEN in-house application built with SAS and SAS system for Windows) | 1                | Statistical analyses of cytokines                                                                                                                                                               |
| Mesa Laboratories AmegaView CMS                                             | v3 Build 1209.08 | Continuous Monitoring System. Monitoring of standalone fridges, freezers, incubators, and selected laboratories to measure temperature, relative humidity, and CO <sub>2</sub> , as appropriate |
| Johnson Controls Metasys                                                    | MVE 7            | Building Automation System. Control of HVAC and other building systems, as well as temperature/humidity control and trending in selected laboratories and animal rooms                          |

## 6. RETENTION OF RECORDS, SAMPLES, AND SPECIMENS

All study-specific raw data, documentation, Study Plan, samples, specimens, and final reports from this study were archived at the Test Facility by no later than the date of Final Report issue. At least 1 year after issue of the Draft Report, the Sponsor will be contacted.

Electronic data generated by the Test Facility were archived as noted above, except that the data collected using Provantis®, reporting files stored on M-Files®, and deviations were archived at the Charles River Laboratories facility location in Wilmington, MA.

All records, retained samples and specimens, and reports generated from phases or segments performed by Sponsor will be archived by the Sponsor. Details regarding the retention of the materials were provided to the Study Director.

Disposition of residual/retained analytical samples was as described in the table below.

Text Table 11  
Disposition of Residual/Retained Samples

| Sample Type                                   | Disposition                                |
|-----------------------------------------------|--------------------------------------------|
| Remaining dose formulations                   | Archived by the Sponsor                    |
| Additional serum                              | Archived by the Sponsor                    |
| Cytokine                                      | Discarded                                  |
| Splenocytes                                   | Archived by the Sponsor                    |
| Bioanalytical (serum and CSF)                 | To be archived by the Sponsor <sup>a</sup> |
| Tissues (biodistribution and gene expression) | Archived by the Sponsor                    |

<sup>a</sup> Samples will be archived following shipment of the samples to the Sponsor (after finalization of the study; refer to [Deviations](#) for further details).

## **7. RESULTS**

### **7.1. Mortality**

([Appendix 3](#))

There were no unscheduled deaths during the study.

### **7.2. Clinical Observations**

([Appendix 4](#))

There were no AAV9/AP4M1-related clinical observations.

Clinical observations including, but not limited to, hunched posture, erected fur, tremors, decreased muscle tone, and decrease activity, were not due to the administration of AAV9/AP4M1 due to their low incidence, transient or sporadic nature, or similar incidence in the control group.

### **7.3. Body Weights and Body Weight Gains**

([Appendix 5](#) and [Appendix 6](#))

There were no AAV9/AP4M1-related effect on body weights or body weight gains.

Any variations were within the range of the concurrent control group data, lacked a dose relationship, and/or were considered to be due to biological variation.

### **7.4. Food Evaluation**

([Appendix 4](#))

There was no AAV9/AP4M1-related effect on appetite.

### **7.5. Neurological Evaluation**

([Appendix 7](#) and [Appendix 8](#))

AAV9/AP4M1-related neurological changes were noted on Day 94 for Male No. 3201 and consisted of abnormal general attitude and motor function (slight tremors in the hindlimbs) and decreased proprioceptive positioning in the left hindlimb.

### **7.6. Nerve Conductivity Velocity**

([Appendix 9](#))

Intrathecal administration of AAV9/AP4M1 at  $1.68 \times 10^{14}$  vg resulted in a slight decrease in mean sural nerve conduction velocity of 11% on Day 45, relative to the control group, accompanied by a decrease in mean response amplitude of 27%. Male No. 3201 exhibited the most significant change with sural nerve conduction velocity (NCV) of 44 m/sec compared to a mean of 52 m/sec in control animals.

On Days 77 and 92, a significant decrease in mean sural nerve conduction velocity of 26% and 28%, respectively, was noted at  $1.68 \times 10^{14}$  vg. The changes in conduction velocity were accompanied by associated decreases in mean sural nerve response amplitude which was reduced by 69% on Day 77 and by 74% on Day 92. Male No. 3201 was the most impacted, exhibiting the

most pronounced changes with sural nerve conduction velocity of 34 m/sec (35% change relative to mean control value) on Day 77 and 32 m/sec (39%) on Day 92 compared to 52-53 m/sec in control animals. The most pronounced decrease in response amplitude was also noted in Male No. 3201, particularly on Day 92, during which an amplitude of 1.2  $\mu$ V was noted compared to a mean amplitude of 10.2  $\mu$ V in control animals.

Individual sural NCV values are presented in the following graphs.

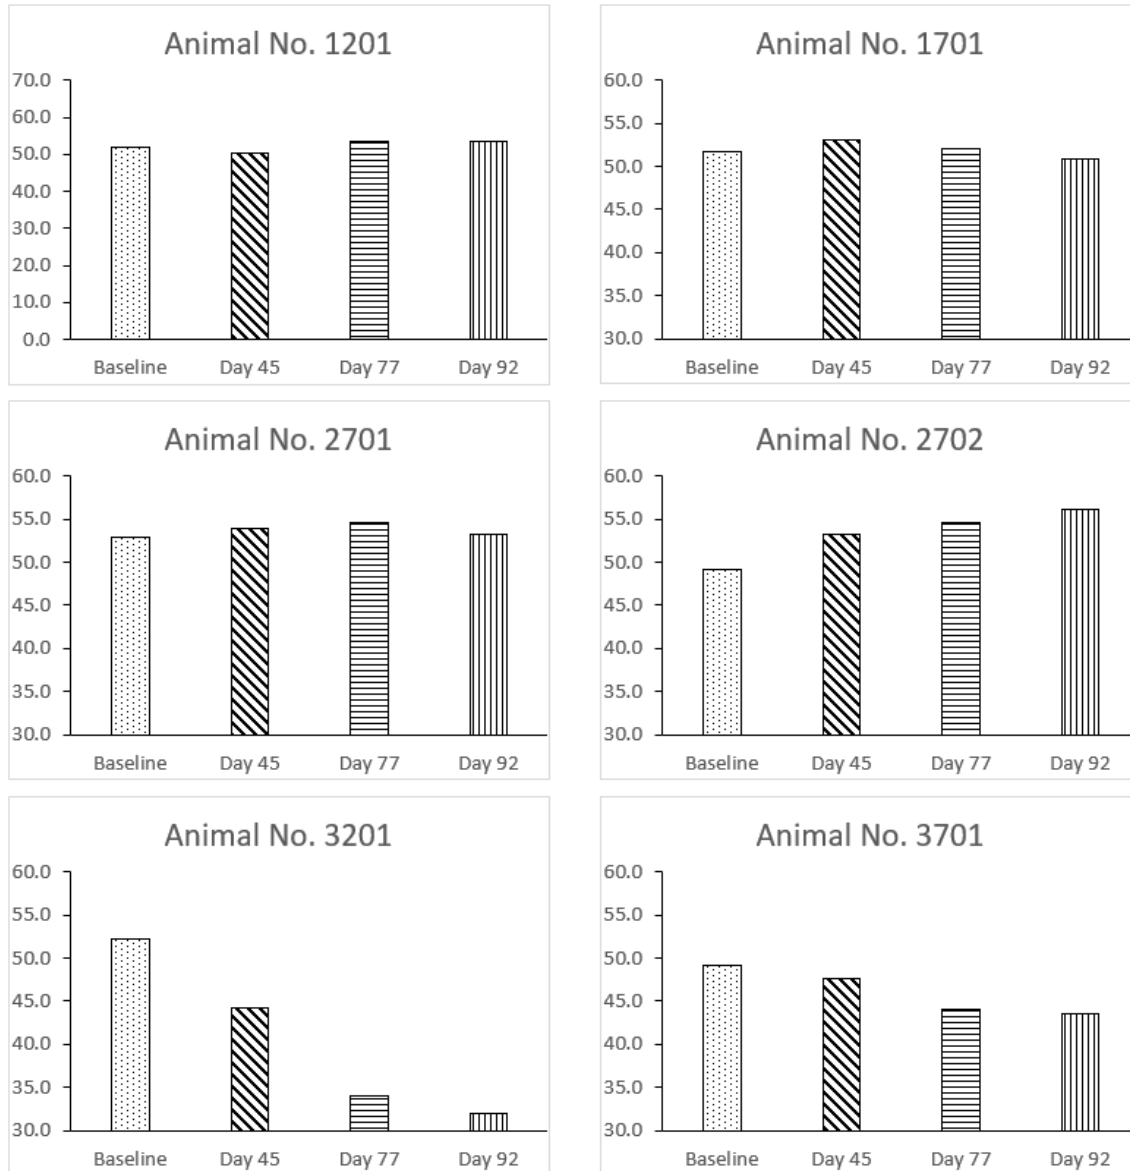

No changes in peroneal nerve conduction velocity or amplitude and no changes in the onset latency of the cauda equina were noted up to Day 92. In addition, there were no changes in conduction velocity or amplitude for the sural nerve at  $8.4 \times 10^{13}$  vg.

## 7.7. Hematology

(Appendix 10)

No AAV9/AP4M1-related hematology changes were noted at any dose level.

On Day 24 only, one female administered AAV9/AP4M1 at  $8.4 \times 10^{13}$  vg (No. 2702) presented mild increases in neutrophil (1.56x, individual value compared to respective pretreatment) and monocyte (3.77x) counts, correlating with changes in coagulation and clinical chemistry parameters. Similar changes in neutrophil and monocyte counts were observed in other animals including one control female (No. 1701) at other timepoints.

All differences in hematology parameters were considered not AAV9/AP4M1-related based on their small magnitude, inconsistent direction, absence of a dose response, general overlap of individual values with the range of control and baseline values, and/or were of a magnitude of change commonly observed in monkeys under similar study conditions.

## 7.8. Coagulation

(Appendix 10)

On Day 24 only, one female administered AAV9/AP4M1 at  $8.4 \times 10^{13}$  vg (No. 2702) presented a transient increase in fibrinogen concentration (2.11x individual value compared to pretreatment), correlating with changes in hematology and clinical chemistry parameters.

A gradual increase in fibrinogen concentration was observed in all individual animals, including control animals between Day 2 and Day 94 compared to their respective pretreatment values. On Days 52 and 94, the male and female at  $1.68 \times 10^{14}$  vg (Nos. 3201 and 3701) presented mild increases in fibrinogen concentration (1.82x to 2.55x, individual values compared to respective pretreatment) that were of higher magnitude than the increases observed in control animals (1.15x to 1.47x, individual values compared to pretreatment). These increases were not associated with relevant changes in globulins or leukocytes. They occurred several weeks after the administration of AAV9/AP4M1 and may have been associated with the microscopic necrosis/inflammation observed in the biceps femoris at the immunosuppressant injection sites; however, they remain of an uncertain relationship to AAV9/AP4M1.

Remaining differences in coagulation parameters were considered not AAV9/AP4M1-related based on their small magnitude, inconsistent direction, absence of a dose response, general overlap of individual values with the range of control and baseline values, and/or were of a magnitude of change commonly observed in monkeys under similar study conditions.

## 7.9. Clinical Chemistry

(Appendix 10)

No AAV9/AP4M1-related clinical chemistry changes were noted at any dose level.

On Day 24 only, one female administered at  $8.4 \times 10^{13}$  vg (No. 2702) presented transient mild increases in globulins (1.32x, individual values compared to pretreatment), triglycerides (4.31x), and decreases in albumin (0.81x) and albumin/globulin ratio (0.57x). These changes correlated with increases in neutrophil and monocyte counts, and an increase in fibrinogen concentration. They were supportive of inflammation and were possibly related to a moderate skin lesion of the left hindlimb observed on Day 28 in this animal. These changes were not observed on Day 52 or

Day 94, after resolution of the skin lesion. This individual had no particular microscopic findings observed at the end of the study; therefore these changes were unlikely AAV9/AP4M1-related.

Remaining differences in clinical chemistry parameters were considered not AAV9/AP4M1-related based on their small magnitude, inconsistent direction, absence of a dose response, general overlap of individual values with the range of control and baseline values, and/or were of a magnitude of change commonly observed in monkeys under similar study conditions.

#### **7.10. Urinalysis**

([Appendix 10](#))

No AAV9/AP4M1-related urinalysis changes were noted at any dose level.

All differences in urinalysis parameters were considered not AAV9/AP4M1-related based on their small magnitude, inconsistent direction, absence of a dose response, general overlap of individual values with the range of control and baseline values, and/or were of a magnitude of change commonly observed in monkeys under similar study conditions.

#### **7.11. Cytokine Analysis**

([Appendix 11](#))

All females administered AAV9/AP4M1 showed increases in IL-8 levels. Increases were noted at 30 minutes postdose (1.8X and 2.7X, respectively) as well as 24 hours postdose (2.9X and 1.2X, respectively). Female No. 2702 showed a 1.6X and 1.5X increase at 4 and 24 hours postdose, respectively. Those increases of low magnitude were considered AAV9/AP4M1-related due to their high incidence with the females. There was no effect in the male administered  $1.68 \times 10^{14}$  vg.

No AAV9/AP4M1-related effect could be observed for IL-6, IL-10, TNF- $\alpha$ , MCP-1, and IP-10.

#### **7.12. Tissue Biodistribution, Gene Expression, and Splenocyte Analysis**

([Appendix 12](#))

Intrathecal delivery of AAV9/AP4M1 vector resulted in delivery of the AP4M1 vector DNA across the central nervous system and peripheral organs. The AP4M1 vector DNA was widely detected at high levels in multiple brain regions. In the peripheral organs, even higher amounts of AP4M1 DNA persisted in the liver and to a lesser extent in other organs tested. AP4M1 vector biodistribution results are shown in [Text Figure 1](#).

Consistent with this AP4M1 DNA biodistribution data, AP4M1 transgene expression was also widely detected at high level in multiple central nervous system (CNS) and peripheral tissues ([Text Figure 2](#)). Collectively, IT delivery of AAV9/AP4M1 results in broad AP4M1 biodistribution and expression across the body of NHPs.

Text Figure 1  
AP4M1 Tissue Biodistribution on Day 94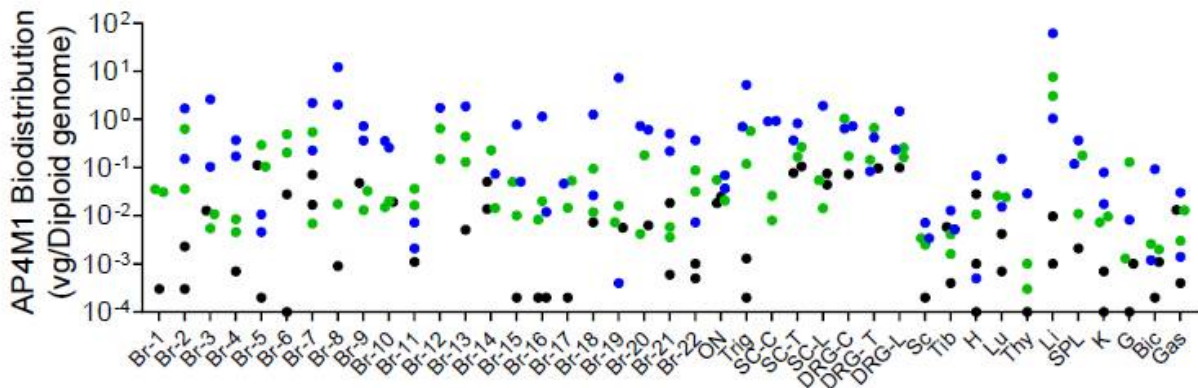Text Figure 2  
AP4M1 Tissue Expression on Day 94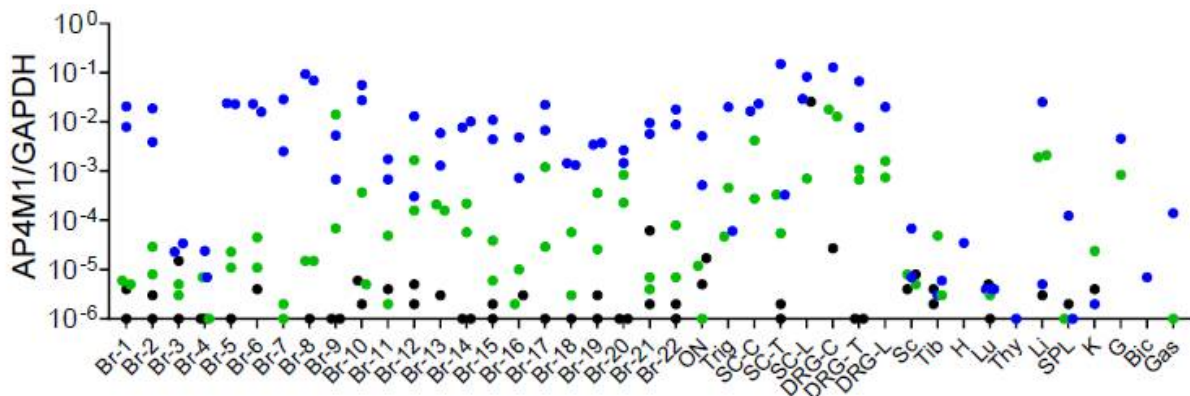

The AAV9/AP4M1 vector generated no detectable T-cell immune response to either AAV9 or the human AP4M1 protein, under the immunosuppressant regimen, as shown in [Text Figure 3](#).

Text Figure 3  
Immune Response of Splenocytes on Day 94

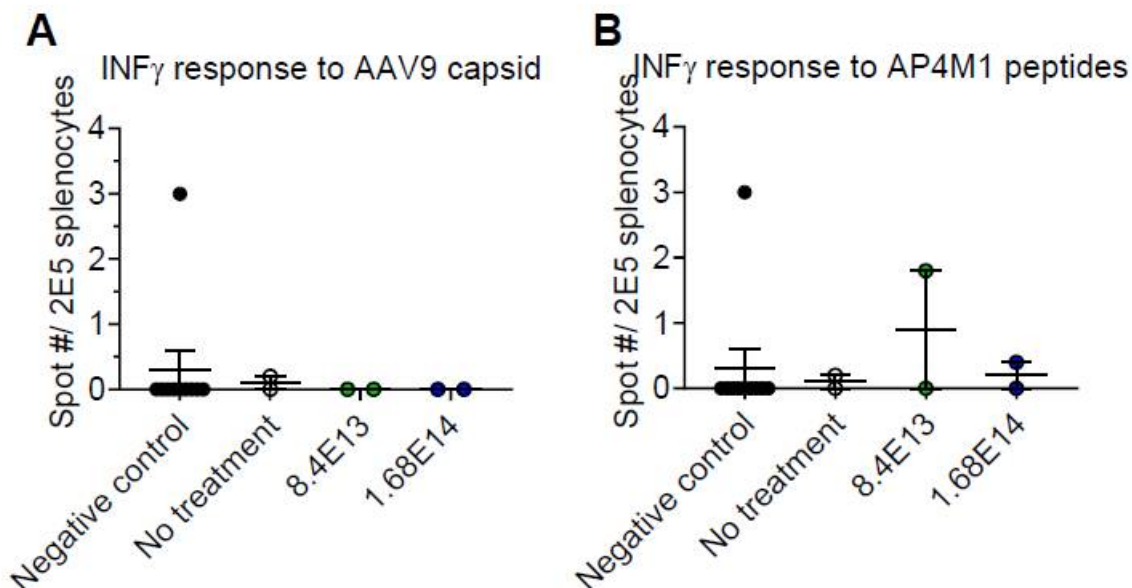

### 7.13. Macroscopic Pathology

(Appendix 13)

No AAV9/AP4M1-related gross findings were noted. The gross findings observed were considered incidental, related to experimental procedures/immunosuppressant administration, of the nature commonly observed in this strain and age of monkeys, and/or were of similar incidence in control and treated animals and, therefore, were considered unrelated to the administration of AAV9/AP4M1.

These included the small thymuses that were observed with a similar incidence across dose groups, including controls, and considered secondary to the administration of immunosuppressants and unrelated to the administration of AAV9/AP4M1. Furthermore, the macroscopic findings noted in the biceps femoris (swelling, thickness, dark/pale foci, and/or mottled discoloration) were seen with a similar incidence across dose groups, including controls, and were considered secondary to the repetitive procedure of intramuscular injection in the thigh, and unrelated to the administration of AAV9/AP4M1.

### 7.14. Organ Weights

(Appendix 13)

No AAV9/AP4M1-related organ weight changes were noted. There were isolated organ weight values that were different from their respective controls. There were, however, no patterns, trends, or correlating data to suggest these values were toxicologically relevant. Thus, the organ weight differences observed were considered incidental, related to experimental procedures/immunosuppressant administration, and/or related to difference of sexual maturity and unrelated to the administration of AAV9/AP4M1.

These included the decreases in thymus weight (absolute or relative to body and brain weight), when compared to organ weight historical data at the Test Facility, that were observed with a

similar magnitude across dose groups, including the control, and were considered secondary to the administration of immunosuppressants, and unrelated to the administration of AAV9/AP4M1.

### 7.15. Microscopic Evaluations

#### (Appendix 13)

AAV9/AP4M1-related microscopic findings occurred in the spinal cord (all segments, including the injection site), lumbar dorsal root ganglion (DRG), lumbar and thoracic dorsal nerve roots, brain, trigeminal ganglion, and peripheral nerves (sciatic, sural, and tibial), and are summarized in the following table.

Text Table 12  
Summary of Microscopic Findings (H&E) – Scheduled Euthanasia (Day 94)

|                                              | Males                 |                       | Females |                      |                       |
|----------------------------------------------|-----------------------|-----------------------|---------|----------------------|-----------------------|
|                                              | Group 1               | 3                     | 1       | 2                    | 3                     |
|                                              | Dose (vg) 0           | 1.68x10 <sup>14</sup> | 0       | 8.4x10 <sup>13</sup> | 1.68x10 <sup>14</sup> |
|                                              | No. Animals per Group | 1                     | 1       | 2                    | 1                     |
| Injection site (No. Examined)                | 1                     | 1                     | 1       | 2                    | 1                     |
| Degeneration; axonal, cauda equina           | (0) <sup>a</sup>      | (1)                   | (0)     | (0)                  | (1)                   |
| Moderate                                     | -                     | 0                     | -       | -                    | 1                     |
| Marked                                       | -                     | 1                     | -       | -                    | 0                     |
| Degeneration; axonal, dorsal funiculus       | (0)                   | (1)                   | (0)     | (0)                  | (0)                   |
| Minimal                                      | -                     | 1                     | -       | -                    | -                     |
| Vacuolation; perivascular, macrophage        | (0)                   | (1)                   | (0)     | (0)                  | (0)                   |
| Mild                                         | -                     | 1                     | -       | -                    | -                     |
| Infiltration, mononuclear cell; perivascular | (0)                   | (0)                   | (0)     | (1)                  | (1)                   |
| Minimal                                      | -                     | -                     | -       | 1                    | 1                     |
| Spinal cord, lumbar (No. Examined)           | 1                     | 1                     | 1       | 2                    | 1                     |
| Degeneration; axonal, dorsal funiculus       | (0)                   | (1)                   | (1)     | (1)                  | (1)                   |
| Minimal                                      | -                     | 0                     | 1       | 1                    | 0                     |
| Mild                                         | -                     | 0                     | 0       | 0                    | 1                     |
| Moderate                                     | -                     | 1                     | 0       | 0                    | 0                     |
| Spinal cord, thoracic (No. Examined)         | 1                     | 1                     | 1       | 2                    | 1                     |
| Degeneration; axonal, dorsal funiculus       | (0)                   | (1)                   | (0)     | (1)                  | (1)                   |
| Minimal                                      | -                     | 0                     | -       | 1                    | 0                     |
| Mild                                         | -                     | 0                     | -       | 0                    | 1                     |
| Moderate                                     | -                     | 1                     | -       | 0                    | 0                     |
| Spinal cord, cervical (No. Examined)         | 1                     | 1                     | 1       | 2                    | 1                     |
| Degeneration; axonal, dorsal funiculus       | (0)                   | (1)                   | (0)     | (1)                  | (1)                   |
| Minimal                                      | -                     | 0                     | -       | 1                    | 0                     |
| Mild                                         | -                     | 1                     | -       | 0                    | 1                     |
| DRG, lumbar (No. Examined)                   | 1                     | 1                     | 1       | 2                    | 1                     |
| Infiltration, mononuclear cell               | (0)                   | (1)                   | (0)     | (2)                  | (1)                   |
| Minimal                                      | -                     | 1                     | -       | 2                    | 1                     |
| Degeneration; neuronal                       | (0)                   | (1)                   | (0)     | (0)                  | (1)                   |
| Minimal                                      | -                     | 1                     | -       | -                    | 1                     |
| Nerve root, dorsal, lumbar (No. Examined)    | 1                     | 1                     | 1       | 2                    | 1                     |
| Degeneration; axonal                         | (0)                   | (1)                   | (0)     | (0)                  | (1)                   |
| Minimal                                      | -                     | 1                     | -       | -                    | 1                     |
| Infiltration, mononuclear cell               | (0)                   | (0)                   | (0)     | (1)                  | (1)                   |
| Minimal                                      | -                     | -                     | -       | 1                    | 1                     |

|                                                    | Males |                       | Females |                      |                       |
|----------------------------------------------------|-------|-----------------------|---------|----------------------|-----------------------|
| Group                                              | 1     | 3                     | 1       | 2                    | 3                     |
| Dose (vg)                                          | 0     | 1.68x10 <sup>14</sup> | 0       | 8.4x10 <sup>13</sup> | 1.68x10 <sup>14</sup> |
| No. Animals per Group                              | 1     | 1                     | 1       | 2                    | 1                     |
| <b>Nerve root, dorsal, thoracic (No. Examined)</b> | 1     | 1                     | 1       | 2                    | 1                     |
| Infiltration, mononuclear cell                     | (0)   | (1)                   | (0)     | (0)                  | (0)                   |
| Minimal                                            | -     | 1                     | -       | -                    | -                     |
| <b>Brain (No. Examined)</b>                        | 1     | 1                     | 1       | 2                    | 1                     |
| Degeneration; axonal, medulla oblongata            | (0)   | (1)                   | (0)     | (0)                  | (0)                   |
| Minimal                                            | -     | 1                     | -       | -                    | -                     |
| Infiltration, mononuclear cell; meninges           | (1)   | (1)                   | (0)     | (2)                  | (1)                   |
| Minimal                                            | 1     | 1                     | -       | 0                    | 1                     |
| Mild                                               | 0     | 0                     | -       | 2                    | 0                     |
| <b>Ganglion, trigeminal (No. Examined)</b>         | 1     | 1                     | 1       | 2                    | 1                     |
| Degeneration; axonal                               | (0)   | (1)                   | (0)     | (0)                  | (0)                   |
| Minimal                                            | -     | 1                     | -       | -                    | -                     |
| Infiltration, mononuclear cell                     | (0)   | (1)                   | (0)     | (0)                  | (0)                   |
| Minimal                                            | -     | 1                     | -       | -                    | -                     |
| <b>Nerve, sciatic (No. Examined)</b>               | 1     | 1                     | 1       | 2                    | 1                     |
| Degeneration; axonal                               | (1)   | (1)                   | (1)     | (2)                  | (1)                   |
| Minimal                                            | 1     | 0                     | 0       | 0                    | 0                     |
| Mild                                               | 0     | 1                     | 1       | 2                    | 0                     |
| Moderate                                           | 0     | 0                     | 0       | 0                    | 1                     |
| <b>Nerve, sural (No. Examined)</b>                 | 1     | 1                     | 1       | 2                    | 1                     |
| Degeneration; axonal                               | (0)   | (1)                   | (0)     | (2)                  | (1)                   |
| Minimal                                            | -     | 0                     | -       | 2                    | 0                     |
| Mild                                               | -     | 1                     | -       | 0                    | 1                     |
| <b>Nerve, tibial (No. Examined)</b>                | 1     | 1                     | 1       | 2                    | 1                     |
| Degeneration; axonal                               | (1)   | (1)                   | (1)     | (2)                  | (1)                   |
| Minimal                                            | 1     | 0                     | 1       | 1                    | 0                     |
| Mild                                               | 0     | 1                     | 0       | 1                    | 1                     |

<sup>a</sup> Numbers in parentheses represent the number of animals with the finding.

At the injection site, which was located at the level of the caudal lumbar spinal cord (target L5-L6), there was moderate to marked axonal degeneration of the nerve roots of the cauda equina in both animals given 1.68x10<sup>14</sup> vg. The axonal degeneration consisted of vacuolation of the axonal sheath, swelling of the axon, and/or internal amorphous eosinophilic debris with or without macrophages (digestion chambers). In the male at 1.68x10<sup>14</sup> vg, there was additional minimal axonal degeneration of the dorsal funiculus, as well as mild perivascular vacuolation of macrophages. Minimal perivascular infiltrates of mononuclear cells were also noted in 2 females at ≥ 8.4x10<sup>13</sup> vg. These infiltrates were mainly composed of lymphocytes, with fewer macrophages. In general, the incidence and severity of axonal degeneration and/or mononuclear cell infiltrates at the injection site paralleled the incidence and severity of positive reaction to Fluoro-Jade B fluorescent stain (indicating degenerated axons), and increased intensity of IBA-1 (microglial cells) and/or GFAP (astrocytes) stains in the affected animals ([Text Table 12](#)).

In the lumbar spinal cord, there was an increase in the severity of axonal degeneration in the dorsal funiculus in both male and female at 1.68x10<sup>14</sup> vg (mild to moderate), when compared to control animals. Positivity to Fluoro-Jade B stain and increased intensity of IBA-1 and/or GFAP stains reflected well this change in both animals at 1.68x10<sup>14</sup> vg. Additionally, based on Fluoro-Jade B stain evaluation, minimal axonal degeneration was observed in the lateral and ventral funiculi of the female at 1.68x10<sup>14</sup> vg.

In the thoracic and cervical spinal cord, there was mild or moderate axonal degeneration in the dorsal funiculus at  $1.68 \times 10^{14}$  vg in both sexes. Minimal severity of axonal degeneration seen in one female at  $8.4 \times 10^{13}$  vg was considered not related to AAV9/AP4M1 given the similar incidence and severity of axonal degeneration noted in the spinal cord (lumbar) of the control female.

In the lumbar dorsal root ganglion, minimal mononuclear cell infiltrates occurred in all AAV9/AP4M1-dosed animals at  $\geq 8.4 \times 10^{13}$  vg, and correlated with minimal increased intensity of IBA-1 in 2 females at  $\geq 8.4 \times 10^{13}$  vg. Minimal neuronal degeneration was also noticed in the lumbar DRG in both male and female at  $1.68 \times 10^{14}$  vg. This latter change was characterized by the effacement/loss of rare neuronal cell bodies with presence of glial and/or mononuclear cells. Lumbar DRG findings were coupled with minimal axonal degeneration of the dorsal lumbar nerve root in both animals at  $1.68 \times 10^{14}$  vg, as well as minimal mononuclear cell infiltrates in females at  $\geq 8.4 \times 10^{13}$  vg, both changes correlating with Fluoro-Jade B stain positivity and/or increased intensity of IBA-1 and/or GFAP in these animals. Minimal mononuclear cell infiltrates were also seen in the dorsal thoracic nerve root in the male at  $1.68 \times 10^{14}$  vg.

In the brain, there was minimal axonal degeneration at the periphery of the medulla oblongata in the male at  $1.68 \times 10^{14}$  vg, and an increase in the severity of meningeal mononuclear cell infiltrates in both females at  $8.4 \times 10^{13}$  vg (mild), when compared to control animals.

In the trigeminal ganglion, there was minimal axonal degeneration and mononuclear cell infiltrates in the male at  $1.68 \times 10^{14}$  vg.

In the peripheral nerves (sciatic, sural, and tibial), there was an increase in severity of axonal degeneration at  $1.68 \times 10^{14}$  vg in both sexes, compared to controls. This change was generally coupled with the presence of edema with or without mixed cell infiltrates dissecting through the nerve fibers and considered likely secondary to the inflammatory changes seen in the nearby biceps femoris (procedural-related changes, see below). Thus, the increase in severity of axonal degeneration seen in peripheral nerves was considered probably related to AAV9/AP4M1, but likely exacerbated by the edema/inflammation associated with experimental procedures (repetitive intramuscular injections).

Other microscopic findings observed were considered incidental, related to experimental procedures/immunosuppressant administration, of the nature commonly observed in this strain and age of monkeys, and/or were of similar incidence and severity in control and treated animals and, therefore, were considered unrelated to the administration of AAV9/AP4M1.

These included minimal to mild decreased lymphoid cellularity in the cervical and iliac lymph nodes and/or spleen that were seen with a similar incidence and severity in all groups, including controls, and considered secondary to the administration of immunosuppressants and unrelated to the administration of AAV9/AP4M1.

There was minimal axonal degeneration in the spinal cord and minimal mononuclear cell infiltrates in the brain (perivascular) and meninges, that were seen in several animals, including controls, and that were considered secondary to the procedure of intrathecal injection and unrelated to the administration of AAV9/AP4M1.

In the biceps femoris, microscopic findings of edema, necrosis/inflammation, myofiber degeneration/atrophy, and fibrosis (with gross correlates of swelling, thickness, dark/pale foci, and/or mottled discoloration) occurred with a similar incidence and severity across dose groups, including control animals. These findings were all considered secondary to the repetitive procedure of intramuscular injection of the immunosuppressant in the thigh, and unrelated to the administration of AAV9/AP4M1.

In the iliac lymph nodes, minimal or mild sinus histiocytosis was also noted with a similar incidence and severity across dose groups, including controls, and was considered to be a physiological response to the inflammatory changes in the biceps femoris.

## 8. CONCLUSION

In conclusion, administration of AAV9/AP4M1 by a single intrathecal injection in monkeys at  $8.4 \times 10^{13}$  and  $1.68 \times 10^{14}$  vg was well tolerated. Adverse findings at  $1.68 \times 10^{14}$  vg included axonal or neuronal degeneration noted microscopically in the spinal cord (including the injection site), lumbar dorsal root ganglion (DRG), dorsal nerve roots, brain, trigeminal ganglion, and peripheral nerves (sciatic, sural, and tibial), with associated decreases in nerve conduction velocity and neurological effects. Based on these results, the no-observed-adverse-effect level (NOAEL) was considered to be  $8.4 \times 10^{13}$  vg.

Furthermore, it was concluded that AAV9 delivered intrathecally can achieve broad distribution as well as expression across the nervous system and peripheral organs without generating any immune response under the immunosuppressant regimen, although the level of gene transfer in the brain is sub-saturating with a minority of cells receiving the transgene.

**9. REFERENCES**

Bee JS, Zhang Y, Phillippi MK, et al. Impact of Time Out of Intended Storage and Freeze-thaw Rates on the Stability of Adeno-associated Virus 8 and 9, *Journal of Pharmaceutical Sciences*, 111(2) (2022).

Gruntman AM, Su L, Su Q, et al. Stability and Compatibility of Recombinant Adeno-Associated Virus Under Conditions Commonly Encountered in Human Gene Therapy Trials, *Human Gene Therapy Methods*, 26(2): 71–76 (2015).

**Appendix 1**

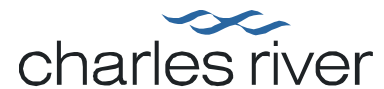

**STUDY PLAN AMENDMENT 6**

**Test Facility Study No. 5550014**

**Sponsor Reference No. UTSW-Gray-SPG50-004**

**A Single-Dose Study of AAV9/AP4M1 by Intrathecal Injection in  
Immunosuppressed Monkeys**

**GLP**

**SPONSOR:**

University of Texas Southwestern Medical Center  
5323 Harry Hines Blvd  
Dallas, TX 75390-9056  
USA

**TEST FACILITY:**

Charles River Laboratories Montreal ULC  
Senneville Site (CR-SEN)  
22022 Transcanadienne  
Senneville, QC H9X 3R3  
Canada

**Appendix 1****SUMMARY OF CHANGES AND JUSTIFICATIONS****Study Plan effective date: 29 Jun 2021**

Note: When applicable, additions are indicated in bold underlined text and deletions are indicated in bold strikethrough text in the affected sections of the document.

| <b>Item or Section(s)</b>                                                                                               | <b>Justification</b>                                                                                                                                                                                                                                                                                                                                                                                                                                                                                                                                   |
|-------------------------------------------------------------------------------------------------------------------------|--------------------------------------------------------------------------------------------------------------------------------------------------------------------------------------------------------------------------------------------------------------------------------------------------------------------------------------------------------------------------------------------------------------------------------------------------------------------------------------------------------------------------------------------------------|
| <b>Amendment 1</b>                                                                                                      | <b>Date: 12 Jul 2021</b>                                                                                                                                                                                                                                                                                                                                                                                                                                                                                                                               |
| Title page,<br>4. RESPONSIBLE PERSONNEL,<br>18. REGULATORY COMPLIANCE,<br>19. QUALITY ASSURANCE –<br><i>NEW SECTION</i> | As requested by the agency, this study will be performed as per GLP; appropriate details were added throughout the document.                                                                                                                                                                                                                                                                                                                                                                                                                           |
| 2. PROPOSED STUDY SCHEDULE                                                                                              | To correct the date of animal transfer to reflect the actual date animals were transferred onto the study.<br>An audited comprehensive Draft report will be provided; report name and dates are updated.                                                                                                                                                                                                                                                                                                                                               |
| 4. RESPONSIBLE PERSONNEL                                                                                                | Due to the absence of Stefania Cinquino, a new Study Director will be assigned effective immediately. The test facility management was also updated.<br>To assign the IS for cytokines and splenocyte preparation.<br>The bioanalytical portion of the study will be performed non-GLP, therefore, the exception was added.                                                                                                                                                                                                                            |
| 7.1. Immunosuppression Material                                                                                         | Due to the availability of the methylprednisolone acetate, the 40 mg/mL concentration will be used in this study.<br>The supplier and storage of Methylprednisolone acetate was updated.                                                                                                                                                                                                                                                                                                                                                               |
| 7.3. Immunosuppressant Preparation Details                                                                              | Methylprednisolone acetate will be used as is; section updated.<br>The storage of Methylprednisolone acetate was updated.                                                                                                                                                                                                                                                                                                                                                                                                                              |
| 10.1. Administration of Test and Reference Item                                                                         | Due to the dose volume, particularly in Group 3, 1 mL of CSF will be removed prior to dosing for all groups.                                                                                                                                                                                                                                                                                                                                                                                                                                           |
| 10.2. Administration of Anti-Inflammatory                                                                               | To update the number of days of meloxicam administration, as per CRL-SEN SOP.                                                                                                                                                                                                                                                                                                                                                                                                                                                                          |
| 10.3. Administration of Immunosuppressant Material                                                                      | The dose volume and concentration of methylprednisolone acetate was updated based on the concentration ordered.<br>The days of rapamycin administration were updated based on the actual day the animals were transferred onto the study, which are considered to be a sufficient number of days for immunosuppression.<br>Due to possible animal replacements; the spare will be administered rapamycin; section updated.<br>To specify that the rapamycin administration will be performed at approximately the same time each day; section updated. |
| 10.3.1. Methylprednisolone Succinate,<br>10.3.2. Methylprednisolone Acetate                                             | To remove reference to warming the immunosuppressants at ambient temperature as these are stored at room temperature.                                                                                                                                                                                                                                                                                                                                                                                                                                  |

**Appendix 1**

| <b>Item or Section(s)</b>                                                                                       | <b>Justification</b>                                                                                                                                                                                                                                                                                                                                                                                     |
|-----------------------------------------------------------------------------------------------------------------|----------------------------------------------------------------------------------------------------------------------------------------------------------------------------------------------------------------------------------------------------------------------------------------------------------------------------------------------------------------------------------------------------------|
| 10.3.3. Rapamycin                                                                                               | The days of rapamycin administration were updated based on the actual day the animals were transferred onto the study, which are considered to be a sufficient number of days for immunosuppression.<br>To specify that the rapamycin administration will be performed at approximately the same time each day; section updated.                                                                         |
| 13.3. Bioanalytical Sample Analysis                                                                             | To include details for the collection and processing of CSF samples                                                                                                                                                                                                                                                                                                                                      |
| 14.7. Tissue Collection for Bioanalysis                                                                         | Section revised to:<br>include animals which are pre-terminally euthanized, to list tissue exceptions where 3 samples are not possible due to the size of the tissue, include the optic nerve which was inadvertently omitted, include PCR techniques for tissue collection, and remove the need for sectioning each punch as duplicate samples are already being provided (right and left hemispheres). |
| 14.8. Tissue Collection for Bioanalysis – <i>NEW SECTION</i>                                                    | Section was added to detail the regions of the brain to be collected and to which punch and slice numbers these correspond.                                                                                                                                                                                                                                                                              |
| 15.3. Pathology Peer Review                                                                                     | To correct the section referenced.                                                                                                                                                                                                                                                                                                                                                                       |
| 22. REPORTING                                                                                                   | A comprehensive Draft report will be provided; section updated.                                                                                                                                                                                                                                                                                                                                          |
| 23.2. Justification of Route and Dose Levels                                                                    | To include reference to the rats study conducted at CRL-SEN.                                                                                                                                                                                                                                                                                                                                             |
| 23.3 Guidelines for Study                                                                                       | To include appropriate guidelines for the study design.                                                                                                                                                                                                                                                                                                                                                  |
| ATTACHMENT A                                                                                                    | To remove the side for brain collection; as the brain is being sectioned.                                                                                                                                                                                                                                                                                                                                |
| ATTACHMENT B                                                                                                    | To correct the sections referenced.                                                                                                                                                                                                                                                                                                                                                                      |
| ATTACHMENT D                                                                                                    | To include a placeholder for the brain slicing diagram                                                                                                                                                                                                                                                                                                                                                   |
| ATTACHMENT E                                                                                                    | To include a placeholder for the spinal cord sampling diagram                                                                                                                                                                                                                                                                                                                                            |
| <b>Amendment 2</b>                                                                                              | <b>Date: 10 Aug 2021</b>                                                                                                                                                                                                                                                                                                                                                                                 |
| 2. PROPOSED STUDY SCHEDULE                                                                                      | Based on feedback from the regulatory agency, the study duration is extended to 94 days. The study dates and reporting schedule are adjusted accordingly.                                                                                                                                                                                                                                                |
| 4. RESPONSIBLE PERSONNEL                                                                                        | Due to their return, the originally assigned Study Director will assume the Study Director responsibilities effective immediately.<br>Due to workload, the pathologist will be reassigned.                                                                                                                                                                                                               |
| 8.2. Animal Identification                                                                                      | To include an alternate method of identification.                                                                                                                                                                                                                                                                                                                                                        |
| 10.3. Administration of Immunosuppressant Material,<br>10.3.2. Methylprednisolone Acetate,<br>10.3.3. Rapamycin | The duration of treatment with each agent is updated based on the extended duration of the study.                                                                                                                                                                                                                                                                                                        |
| 11.1. Nerve Conductivity Velocity (NCV)                                                                         | The occasions are adjusted based on the extended study duration, and to specify that the postdose evaluations will be performed in a blinded manner.                                                                                                                                                                                                                                                     |
| 12.1. Sample Collection                                                                                         | To include an additional clinical pathology occasion based on the extended study duration.                                                                                                                                                                                                                                                                                                               |
| 13.2. Cytokine Sample Analysis                                                                                  | To remove the KC-like as this cytokine is not validated for monkeys. Additionally, to include the details for IP-10 analysis as this cytokine is analyzed with a separate assay.                                                                                                                                                                                                                         |
| 14. TERMINAL PROCEDURES                                                                                         | Based on feedback from the regulatory agency, the study duration is extended to 94 days.; necropsy day is adjusted accordingly.                                                                                                                                                                                                                                                                          |
| 14.7. Tissue Collection for Bioanalysis                                                                         | Tissues for bioanalysis will also be collected from animals found dead; section updated accordingly.                                                                                                                                                                                                                                                                                                     |

**Appendix 1**

| <b>Item or Section(s)</b>                   | <b>Justification</b>                                                                                                                                                                                         |
|---------------------------------------------|--------------------------------------------------------------------------------------------------------------------------------------------------------------------------------------------------------------|
| 14.8. Tissue Collection for Bioanalysis     | The slice numbers indicated were updated to match the brain sampling diagram in Attachment D. In addition, the regions of the brain were re-ordered according to the slice number in which they are located. |
| 15.3. Pathology Peer Review                 | As the pathologist was re-assigned (previously the peer review pathologist), the peer review pathologist was re-assigned as well.                                                                            |
| 17. COMPUTERIZED SYSTEMS                    | To include the software to be used for cytokine analysis.                                                                                                                                                    |
| 18. REGULATORY COMPLIANCE                   | To specify that the nerve conduction velocity assessment is performed outside of GLP.                                                                                                                        |
| ATTACHMENT A                                | To clarify the sampling for the DRGs and spinal cord segments.                                                                                                                                               |
| ATTACHMENT B                                | To clarify the sampling for the brain.                                                                                                                                                                       |
| ATTACHMENT D                                | To include the brain sampling diagram.                                                                                                                                                                       |
| ATTACHMENT E                                | To include the spinal cord sampling diagram.                                                                                                                                                                 |
| <b>Amendment 3</b>                          | <b>Date: 24 Sep 2021</b>                                                                                                                                                                                     |
| 2. PROPOSED STUDY SCHEDULE                  | To include an inlife summary memo.                                                                                                                                                                           |
| 7.1. Immunosuppression Material             | To include an additional supplier for rapamycin.                                                                                                                                                             |
| 11.1. Nerve Conductivity Velocity (NCV)     | A potential effect on NCV was noted on Day 45, however, due to the limited number of animals, an additional occasion will be added to confirm the potential effect.                                          |
| ATTACHMENT D                                | The punch numbers were updated based on the changes made in Amendment 2.                                                                                                                                     |
| ATTACHMENT E                                | Due to formatting issues when converting the amendment to PDF, the spinal cord diagram became unreadable. The diagram is being re-amended.                                                                   |
| <b>Amendment 4</b>                          | <b>Date: 12 Oct 2021</b>                                                                                                                                                                                     |
| 4. RESPONSIBLE PERSONNEL                    | To include the PI for tissue gene expression.<br>To include an IS for clinical pathology.                                                                                                                    |
| 14. TERMINAL PROCEDURES                     | The tissues for microscopic evaluation was updated as per Attachment A.                                                                                                                                      |
| 14.9. Splenocyte Sample Collection Analysis | To correct the analytical procedure.<br>To correct the referenced attachment.                                                                                                                                |
| 15.2. Microscopic Evaluation                | Based on the microscopic findings noted in the previously conducted rat study with the same test item, IHC will be performed on selected tissues.                                                            |
| ATTACHMENT A                                | Based on the microscopic findings noted in the previously conducted rat study with the same test item, additional tissues were added for microscopic evaluation.                                             |
| ATTACHMENT C                                | To include the shipping details of the splenocytes.                                                                                                                                                          |
| <b>Amendment 5</b>                          | <b>Date: 20 Oct 2021</b>                                                                                                                                                                                     |
| 4. RESPONSIBLE PERSONNEL                    | To include an IS for clinical pathology.<br>To include an PI for splenocyte analysis.                                                                                                                        |
| 14.9. Splenocyte Sample Collection Analysis | To include the method for splenocyte analysis.                                                                                                                                                               |
| 16. STATISTICAL ANALYSIS                    | To include the mean and standard deviation for NCV data.                                                                                                                                                     |
| 18. REGULATORY COMPLIANCE                   | Tissue and splenocyte analysis will not be conducted as per GLP; exception was included.                                                                                                                     |
| ATTACHMENT A                                | To defined the abbreviation "DRG".                                                                                                                                                                           |

**Appendix 1**

| <b>Item or Section(s)</b>                                                                                                                                             | <b>Justification</b>                                                                                                  |
|-----------------------------------------------------------------------------------------------------------------------------------------------------------------------|-----------------------------------------------------------------------------------------------------------------------|
| <b>Amendment 6</b>                                                                                                                                                    | <b>Date: 22 Dec 2021</b>                                                                                              |
| 14.7. Tissue Collection for Histopathology, Biodistribution, and Gene Expression,<br>14.8. Tissue Collection for Histopathology, Biodistribution, and Gene Expression | To rename the titles of these sections to accurately capture for which analyses the samples were collected.           |
| 15.3. Pathology Peer Review                                                                                                                                           | To remove reference of the slides being shipped as the pathology peer review was done by a Test Facility pathologist. |
| 21. RETENTION AND DISPOSITION OF RECORDS, SAMPLES, AND SPECIMENS                                                                                                      | To include the disposition of all samples collected on study.                                                         |
| ATTACHMENT A                                                                                                                                                          | To remove reference to macroscopic abnormalities as these were not to be processed and evaluated microscopically.     |

**Appendix 1****TABLE OF CONTENTS**

|                                                                        |    |
|------------------------------------------------------------------------|----|
| SUMMARY OF CHANGES AND JUSTIFICATIONS.....                             | 2  |
| 1. OBJECTIVE.....                                                      | 8  |
| 2. PROPOSED STUDY SCHEDULE .....                                       | 8  |
| 3. SPONSOR .....                                                       | 8  |
| 4. RESPONSIBLE PERSONNEL.....                                          | 9  |
| 5. TEST MATERIALS.....                                                 | 11 |
| 6. DOSE FORMULATION AND ANALYSIS .....                                 | 12 |
| 7. IMMUNOSUPPRESSION FORMULATION.....                                  | 12 |
| 8. TEST SYSTEM.....                                                    | 13 |
| 9. HUSBANDRY .....                                                     | 15 |
| 10. EXPERIMENTAL DESIGN.....                                           | 16 |
| 11. IN-LIFE PROCEDURES, OBSERVATIONS, AND MEASUREMENTS .....           | 19 |
| 12. CLINICAL PATHOLOGY .....                                           | 20 |
| 13. CYTOKINES COLLECTION AND ANALYSIS.....                             | 22 |
| 14. TERMINAL PROCEDURES .....                                          | 23 |
| 15. MICROSCOPIC EVALUATION .....                                       | 27 |
| 16. STATISTICAL ANALYSIS .....                                         | 28 |
| 17. COMPUTERIZED SYSTEMS .....                                         | 29 |
| 18. REGULATORY COMPLIANCE .....                                        | 30 |
| 19. QUALITY ASSURANCE.....                                             | 30 |
| 20. AMENDMENTS AND DEVIATIONS .....                                    | 30 |
| 21. RETENTION AND DISPOSITION OF RECORDS, SAMPLES, AND SPECIMENS ..... | 31 |
| • STUDY CLASSIFICATION .....                                           | 31 |
| 22. REPORTING.....                                                     | 32 |
| 23. JUSTIFICATIONS AND GUIDELINES .....                                | 32 |
| 24. ANIMAL WELFARE .....                                               | 33 |
| 25. REFERENCES .....                                                   | 33 |
| TEST FACILITY APPROVAL.....                                            | 34 |
| SPONSOR APPROVAL .....                                                 | 35 |

**Appendix 1**

|                    |    |
|--------------------|----|
| ATTACHMENT A ..... | 36 |
| ATTACHMENT B ..... | 39 |
| ATTACHMENT C ..... | 41 |
| ATTACHMENT E.....  | 46 |

**Appendix 1****1. OBJECTIVE**

The objectives of this study are to determine the potential toxicity, biodistribution, and gene expression of AAV9/AP4M1, for the treatment of Spastic Paraplegia Type 50 (SPG50) caused by the AP4M1 gene mutation, when given by a single intrathecal injection to monkeys, to evaluate the potential reversibility and/or progression of any findings, and to determine the potential impact of immunosuppressant (IMS) on the toxicity profile of this AAV9 vector.

**2. PROPOSED STUDY SCHEDULE**

Proposed study dates are listed below. Actual dates will be included in the Final Report.

|                               |                                                                                                                             |
|-------------------------------|-----------------------------------------------------------------------------------------------------------------------------|
| Experimental Starting Date:   | 02 Jul 2021<br>(First date of study-specific data collection)                                                               |
| Experimental Completion Date: | 09 May 2022<br>(Last date on which data are collected)                                                                      |
| Animal Transfer:              | 30 Jun 2021                                                                                                                 |
| Initiation of Dosing:         | 13 Jul 2021                                                                                                                 |
| Completion of In-life:        | 14 Oct 2021<br>(Last date of necropsy)                                                                                      |
| In-life Summary Memo:         | 29 Oct 2021<br>(2 weeks following completion of in-life)                                                                    |
| Audited Draft Report:         | 09 Dec 2021<br>(10 weeks following completion of in-life)                                                                   |
| Final Report:                 | 09 Apr 2022<br>(Expected date of Study Director signature of report. Target to be within 6 months of issue of Draft Report) |

**3. SPONSOR**

| Role/Phase                       | Name             | Contact Information                                                                                                                                                                                              |
|----------------------------------|------------------|------------------------------------------------------------------------------------------------------------------------------------------------------------------------------------------------------------------|
| Sponsor Representative           | Steven Gray, PhD | University of Texas Southwestern Medical Center<br>5323 Harry Hines Blvd<br>University of Texas Southwestern Medical Center<br>Dallas, TX 75390<br>Tel: 214.648.0670<br>E-mail: steven.gray@UTsouthwestern.edu   |
| Alternate Sponsor Representative | Roxana Ploski    | University of Texas Southwestern Medical Center<br>5323 Harry Hines Blvd<br>University of Texas Southwestern Medical Center<br>Dallas, TX 75390<br>Tel: 214.648.9828<br>E-mail: roxana.ploski@UTsouthwestern.edu |

**Appendix 1**

| Role/Phase              | Name              | Contact Information                                                                                             |
|-------------------------|-------------------|-----------------------------------------------------------------------------------------------------------------|
| Alternate Study Contact | Terry Pirovolakis | CureSPG50<br>6 Topham Road<br>Toronto, ON M4B 3K2<br>Canada<br>Tel:416.625.1933<br>E-mail: tpirovol@hotmail.com |

**4. RESPONSIBLE PERSONNEL**

| Role/Phase                                                 | Quality Assurance Program (QAP) | Name                                 | Contact Information                                                                                                                                                                                            |
|------------------------------------------------------------|---------------------------------|--------------------------------------|----------------------------------------------------------------------------------------------------------------------------------------------------------------------------------------------------------------|
| Study Director                                             | Charles River                   | Stefania Cinquino, BSc               | Address as cited for Test Facility<br>Tel: 514.630.8200, ext 2151<br>E-mail: stefania.cinquino@crl.com                                                                                                         |
| Test Facility Management                                   | Charles River                   | Julie Douville, PhD                  | Address as cited for Test Facility<br>Tel: 514.630.8200, ext 8309<br>E-mail: julie.douville@crl.com                                                                                                            |
| Test Facility QAP                                          | Charles River                   | Nooshin Davani, BSc, RQAP-GLP        | Address as cited for Test Facility<br>Tel: 514.630.8200, ext 2605<br>E-mail: nooshin.davani@crl.com                                                                                                            |
| <b>Individual Scientist (IS)</b>                           |                                 |                                      |                                                                                                                                                                                                                |
| Nerve Conduction Velocity                                  | Charles River                   | Nataliya Sadekova, MSc, DSP          | Address as cited for Test Facility<br>Tel: 514.630.8200, ext 2334<br>E-mail: nataliya.sadekova@crl.com                                                                                                         |
| Cytokines                                                  | Charles River                   | Hycham Harouchi, BSc                 | Address as cited for Test Facility<br>Tel: 514.630.8200, ext 8847<br>E-mail: hycham.harouchi@crl.com                                                                                                           |
| Pathology                                                  | Charles River                   | Elaine Debien, DVM, DES, MSc, DACVP  | Address as cited for Test Facility<br>Tel: 819.346.8200, ext 7016<br>E-mail: elaine.debien@crl.com                                                                                                             |
| Immuno-toxicology Splenocyte Preparation                   | Charles River                   | Philippe Rousseau, PhD               | Address as cited for Test Facility<br>Tel: (514) 630-8200, ext 2154<br>E-mail: philippe.tousseau@crl.com                                                                                                       |
| Clinical Pathology                                         | Charles River                   | Florence Poitout, DVM, DACVP, DECVCP | Address as cited for Test Facility<br>Tel: 514.630.8200, ext 2201<br>E-mail: florence.poitout@crl.com                                                                                                          |
| <b>Principal Investigator (PI)</b>                         |                                 |                                      |                                                                                                                                                                                                                |
| Tissue Biodistribution Analysis (Bioanalysis) <sup>a</sup> | N/A                             | Steven Gray, PhD                     | University of Texas Southwestern Medical Center<br>5323 Harry Hines Blvd<br>University of Texas Southwestern Medical Center<br>Dallas, TX 75390<br>Tel: 214-648-0670<br>E-mail: steven.gray@UTsouthwestern.edu |

**Appendix 1**

| <b>Role/Phase</b>                            | <b>Quality Assurance Program (QAP)</b> | <b>Name</b>      | <b>Contact Information</b>                                                                                                                                                                                        |
|----------------------------------------------|----------------------------------------|------------------|-------------------------------------------------------------------------------------------------------------------------------------------------------------------------------------------------------------------|
| Tissue Gene expression Analysis <sup>a</sup> | Test Site                              | Steven Gray, PhD | University of Texas Southwestern Medical Center<br>5323 Harry Hines Blvd<br>University of Texas Southwestern Medical Center<br>Dallas, TX 75390<br>Tel: 214-648-0670<br>E-mail:<br>steven.gray@UTsouthwestern.edu |
| Splenocyte Analysis <sup>a</sup>             | Test Site                              | Steven Gray, PhD | University of Texas Southwestern Medical Center<br>5323 Harry Hines Blvd<br>University of Texas Southwestern Medical Center<br>Dallas, TX 75390<br>Tel: 214-648-0670<br>E-mail:<br>steven.gray@UTsouthwestern.edu |

<sup>a</sup> Sponsor.

Each IS and PI is required to report any deviations or other circumstances that could affect the quality or integrity of the study to the Study Director in a timely manner for authorization/acknowledgement. Each IS and PI, with the exception of those listed below, will provide a report addressing their assigned phase of the study, which will be included as an appendix to the Final Report.

The IS phase report will include the following:

- A listing of critical computerized systems used in the conduct and/or interpretation of the assigned study phase

The IS for the Immunotoxicology Splenocyte Preparation phase will not provide a formal report.

The PI phase report will include the following:

- The archive site for all records, samples, specimens and reports generated from the phase or segment (alternatively, details regarding the retention of the materials may be provided to the Study Director for inclusion in the Final Report)
- A listing of critical computerized systems used in the conduct and/or interpretation of the assigned study phase

**Appendix 1****5. TEST MATERIALS****5.1. Test and Reference Item Characterization**

A Certificate of Analysis or equivalent documentation will be provided for inclusion in the Final Report (if available).

**5.2. Test Item Identification****Test Item Identification**

|                                                              | <b>Test Item</b>                                                                               |
|--------------------------------------------------------------|------------------------------------------------------------------------------------------------|
| <b>Identification:</b>                                       | AAV9/AP4M1                                                                                     |
| <b>Alternate Identification:</b>                             | rAAV9.AP4M1                                                                                    |
| <b>Batch/Lot No.:</b>                                        | T-GEMINIS-033                                                                                  |
| <b>Expiration/Retest Date:</b>                               | 22 Dec 2021 (1-year stability time point)<br>Stability concomitant to the study                |
| <b>Physical Description:</b>                                 | Colorless, clear to slightly opalescent, free of visible particles                             |
| <b>Concentration:<br/>(based on ddPCR results)</b>           | 5.43E13 vg/mL                                                                                  |
| <b>Storage Conditions<br/>(temperature set to maintain):</b> | -80°C<br>(upon thawing of a vial, it may be stored at 4°C and used on a subsequent dosing day) |
| <b>Provided by:</b>                                          | Sponsor                                                                                        |

**5.3. Reference Item/Vehicle Identification****Reference Item/Vehicle Identification**

|                                                              | <b>Reference Item</b>                                 |
|--------------------------------------------------------------|-------------------------------------------------------|
| <b>Identification:</b>                                       | PBS containing 5% D-sorbitol and 0.001% pluronic F-68 |
| <b>Storage Conditions<br/>(temperature set to maintain):</b> | -80°C                                                 |
| <b>Provided by:</b>                                          | Sponsor                                               |

**5.4. Test and Reference Item Inventory and Disposition**

Records of the receipt, distribution, storage, and disposition of test materials will be maintained. All unused Sponsor-supplied bulk test materials, with the exception of reserve samples, will be returned to the Sponsor following issuance of the Draft Report unless otherwise requested (documentation will be retained in the study record). An earlier shipment of these materials may also be requested and authorized by the Study Director and Sponsor. See Shipment of Samples and Study Records ([Attachment C](#)) for shipping details.

**5.5. Safety**

The safety precautions for the test item and dose formulations will be documented in a Test Material Safety Data Sheet (TMSDS) based on the SDS or similar document.

**Appendix 1****6. DOSE FORMULATION AND ANALYSIS****6.1. Preparation of Formulations**

Dose formulations will be divided into aliquots, where required, and dispensed on each dosing occasion.

**Preparation Details**

| <b>Dose Formulation</b> | <b>Frequency of Preparation</b> | <b>Storage Conditions<br/>(temperature set to maintain)</b> |
|-------------------------|---------------------------------|-------------------------------------------------------------|
| Reference Item          | Used as received                | 4°C                                                         |
| Test Item               | At least once                   | 4°C                                                         |

Any residual volumes from each dosing occasion will be will be shipped back to the Sponsor; see [Attachment C](#). Residual volumes will be archived by the Sponsor and will be kept for potential future analysis. Analysis, if conducted, will be added by amendment.

**6.2. Preparation Details**

Dosing formulations will be prepared under a laminar flow hood using clean procedures.

Dosing formulations will be prepared based on Sponsor's instructions at appropriate concentrations to meet dose level requirements.

**7. IMMUNOSUPPRESSION FORMULATION****7.1. Immunosuppression Material****Immunosuppression (IMS) Identification**

|                                                              | <b>IMS 1</b>                 | <b>IMS 2</b>               | <b>IMS 3</b>                                |
|--------------------------------------------------------------|------------------------------|----------------------------|---------------------------------------------|
| <b>Identification:</b>                                       | Methylprednisolone succinate | Methylprednisolone acetate | Rapamycin                                   |
| <b>Alternate Identification:</b>                             | Solu-Medrol                  | Depo-Medrol                | -                                           |
| <b>Physical Description:</b>                                 | Liquid                       | Liquid                     | Powder                                      |
| <b>Concentration:</b>                                        | 125 mg/mL                    | 40 mg/mL                   | N/A                                         |
| <b>Storage Conditions<br/>(temperature set to maintain):</b> | 21°C<br>Protected from light | 21°C                       | -20°C<br>Protected from light               |
| <b>Provided by:</b>                                          | Test Facility                | Test Facility              | Test Facility                               |
| <b>Supplier:</b>                                             | Pfizer                       | Zoetis Canada or Pfizer    | Toronto Research<br>Chemicals or Alfa Aesar |

N/A = Not applicable

**Appendix 1****7.2. Immunosuppression Vehicle****Immunosuppressants Vehicle Identification**

|                                                          | <b>Vehicle for Solu-Medrol</b>      | <b>Vehicle Components for Rapamycin</b> |                           |                     |
|----------------------------------------------------------|-------------------------------------|-----------------------------------------|---------------------------|---------------------|
| <b>Identification:</b>                                   | 0.9% sodium chloride injection, USP | N,N-Dimethylacetamide                   | Tween-80                  | Polyethylene Glycol |
| <b>Storage Conditions (temperature set to maintain):</b> | 21°C                                | 21°C                                    | 21°C Protected from light | 21°C                |
| <b>Provided by:</b>                                      | Test Facility                       | Test Facility                           | Test Facility             | Test Facility       |

**7.3. Immunosuppressant Preparation Details**

IMS dose formulations will be divided into aliquots, where required, and dispensed on each dosing occasion.

**Preparation Details**

| <b>Dose Formulation</b>      | <b>Frequency of Preparation</b> | <b>Storage Conditions (temperature set to maintain)</b> |
|------------------------------|---------------------------------|---------------------------------------------------------|
| Methylprednisolone succinate | At least weekly                 | 21°C protected from light                               |
| Methylprednisolone acetate   | Used as is                      | 21°C                                                    |
| Rapamycin                    | At least weekly                 | 4°C Protected from light (in amber glass vials)         |

IMS dosing formulations will be prepared based on Sponsor's instructions at appropriate concentrations to meet dose level requirements.

**7.4. Sample Collection and Analysis**

Samples for test or reference item dose formulation and/or IMS dose formulation analysis will not be collected by the Test Facility.

**8. TEST SYSTEM**

Species: Monkey  
 Strain: Cynomolgus  
 Condition: Purpose-bred, naïve  
 Source: CR-SEN Colony, original source will be documented in the Final Report  
 Continent of Origin: Vietnam  
 Number of Males to be Assigned: 2

**Appendix 1**

Number of Females to 4 (plus 1 alternate)  
be Assigned:

Target Age at the 2 to 4 years of age  
Initiation of Dosing:

Target Weight at the 1.5 to 6 kg  
Initiation of Dosing:

The actual age and weight of the animals at the initiation of dosing will be listed in the Final Report.

**8.1. Animal Screening**

Method: All animals used on study will have documentation to confirm one negative tuberculosis (TB) test. Additional TB testing may be performed as required.

**8.2. Animal Identification**

Method: Subcutaneously implanted electronic identification chip or tattoo.

**8.3. Environmental Acclimation**

Method: At least 2 weeks will be allowed between animal transfer and the start of dosing in order to accustom the animals to the laboratory environment.

**8.4. Selection, Assignment, Replacement, and Disposition of Animals**

Selection: Pre-established pairs will be assigned to groups using a computerized-based randomization procedure. Males and females will be randomized separately.

Replacement: Before the initiation of dosing, any assigned animals considered unsuitable for use in the study will be replaced by alternate animals. After initiation of dosing, study animals may be replaced during the replacement period with alternate animals in the event of accidental injury, non-test item-related health issues, or similar circumstances. The alternate animals may be used as replacements on the study within 2 days. General in-life assessments will include alternate animals until released from study.

Disposition: The disposition of all animals will be documented in the study records.

**Appendix 1****9. HUSBANDRY****9.1. Housing**

|                      |                                                                                  |
|----------------------|----------------------------------------------------------------------------------|
| Housing:             | Group-housed (up to 3 animals of the same sex and same dosing group together).   |
| Caging:              | Stainless steel cages with stainless steel mesh floor                            |
| Cage Identification: | Color-coded cage card indicating study, group, animal/tattoo number(s), and sex. |

Housing set-up is as described in the *Guide for the Care and Use of Laboratory Animals* ([National Research Council, 2011](#)) Animals will be separated during designated procedures/activities or will be separated as required for monitoring and/or health purposes, as deemed appropriate by Study Director and/or Clinical Veterinarian.

**9.2. Animal Enrichment**

|                                                |                                                                                                                                                                                                                                                                                                                                                                                                                         |
|------------------------------------------------|-------------------------------------------------------------------------------------------------------------------------------------------------------------------------------------------------------------------------------------------------------------------------------------------------------------------------------------------------------------------------------------------------------------------------|
| Psychological/<br>Environmental<br>Enrichment: | Animals will be socially housed and will be provided with items such as perches, floor enrichment devices, foraging devices and/or suspended devices, except during study procedures/activities. Additional enrichment, such as music, natural sounds or color videos films will also be provided. Each animal will be offered food supplements (such as certified treats, fruit/vegetables and/or Foraging Crumbles™). |
|------------------------------------------------|-------------------------------------------------------------------------------------------------------------------------------------------------------------------------------------------------------------------------------------------------------------------------------------------------------------------------------------------------------------------------------------------------------------------------|

**9.3. Environmental Conditions**

The targeted conditions for animal room environment will be as follows:

|              |                                                                        |
|--------------|------------------------------------------------------------------------|
| Temperature: | 23 ±3°C                                                                |
| Humidity:    | 30% to 70%                                                             |
| Light Cycle: | 12 hours light and 12 hours dark (except during designated procedures) |

**9.4. Food**

|                   |                                                                                                                                                                                                                                                                                |
|-------------------|--------------------------------------------------------------------------------------------------------------------------------------------------------------------------------------------------------------------------------------------------------------------------------|
| Diet:             | Lab Diet Certified Primate Diet 5048                                                                                                                                                                                                                                           |
| Type:             | Pellets                                                                                                                                                                                                                                                                        |
| Frequency/Ration: | Twice daily, except during designated procedures. The chow will be provided in amounts appropriate for the size and age of the animals.                                                                                                                                        |
| Analysis:         | Results of analysis for nutritional components and environmental contaminants are provided by the supplier and are kept on file at the Test Facility. It is considered that there are no known contaminants in the feed that would interfere with the objectives of the study. |

**Appendix 1****9.5. Water**

Type: Municipal tap water, treated by reverse osmosis and ultraviolet irradiation.

Frequency/Ration: Freely available to each animal via an automatic watering system (except during designated procedures).

Analysis: Periodic analysis of the water is performed, and results of these analyses are kept on file at the Test Facility. It is considered that there are no known contaminants in the water that would interfere with the outcome of the study.

**9.6. Veterinary Care**

Veterinary care will be available throughout the course of the study and animals will be examined by the veterinary staff as warranted by clinical signs or other changes. In the event that animals show signs of illness or distress, the responsible veterinarian may make initial recommendations about treatment of the animal(s) and/or alteration of study procedures, which must be approved by the Study Director or Scientific designate. Treatment of the animal(s) for minor injuries or ailments may be approved without prior consultation with the Sponsor representative when such treatment does not impact fulfillment of the study objectives. If the condition of the animal(s) warrants significant therapeutic intervention or alterations in study procedures, the Sponsor representative will be contacted, when possible, to discuss appropriate action. If the condition of the animal(s) is such that emergency measures must be taken, the Study Director (or Scientific designate) and/or veterinarian will attempt to consult with the Sponsor representative prior to responding to the medical crisis, but the Study Director (or Scientific designate) and/or veterinarian has authority to act immediately at his/her discretion to alleviate suffering. The Sponsor representative will be fully informed of any such events.

**10. EXPERIMENTAL DESIGN****Experimental Design**

| Group No. | Test Material  | Dose Level (vg)       | Dose Volume (mL) | Dose Concentration (vg/mL) | No. of Animals |         |
|-----------|----------------|-----------------------|------------------|----------------------------|----------------|---------|
|           |                |                       |                  |                            | Main Study     |         |
|           |                |                       |                  |                            | Males          | Females |
| 1         | Reference Item | 0                     | 1                | 0                          | 1              | 1       |
| 2         | AAV9/AP4M1     | $8.4 \times 10^{13}$  | 1.55             | $5.43 \times 10^{13}$      | -              | 2       |
| 3         | AAV9/AP4M1     | $1.68 \times 10^{14}$ | 3.10             | $5.43 \times 10^{13}$      | 1              | 1       |

**10.1. Administration of Test and Reference Item**

Dose Route: Percutaneous intrathecal injection (slow bolus, target rate of 1 mL/min) at the lumbar level (target L5-L6 space, L4-L5 may also be used if necessary)

Frequency: Once

**Appendix 1**

Duration: 1 day

Method: The first day of dosing will be designated as Day 1.

Animals will be food deprived at least 6 hours prior to dosing. Animals will be anesthetized with a ketamine/dexmedetomidine/glycopyrrolate cocktail. Tracheal intubation will be performed, oxygen will be provided and anesthesia will then be maintained using isoflurane, if required.

Prior to dose administration, a 1-mL CSF sample will be withdrawn, as per Section 13.3.

Dose formulations will be allowed to warm up to room temperature for at least 30 minutes prior to dosing.

Percutaneous intrathecal injection will be performed using atraumatic spinal needle (e.g. B Braun, 25 Gauge, 1 inch); actual needle will be recorded in the raw data. Animals will remain in a Trendelenberg position for at least 15 minutes after the dosing is completed prior to the administration of the reversal agent (atipamezole), when required.

**10.2. Administration of Anti-Inflammatory**

On days of dose administration and/or CSF collections, animals will receive an anti-inflammatory (Meloxicam) subcutaneously prior to dosing/CSF collection and then orally daily, starting the morning after dosing/CSF collection, for a total of 3 doses.

**Appendix 1****10.3. Administration of Immunosuppressant Material****Immunosuppressant (IMS) Information**

| Group No.           | Test Material                | Study Day | Method                 | Dose Level (mg/kg/dose) | Dose Volume (mL/kg) | Dose Concentration (mg/mL) | Frequency                             |
|---------------------|------------------------------|-----------|------------------------|-------------------------|---------------------|----------------------------|---------------------------------------|
| 1 to 3 <sup>a</sup> | Methylprednisolone succinate | 1         | IV infusion for 30 min | 10                      | 0.5                 | 20                         | Once on Day 1 only                    |
|                     | Methylprednisolone acetate   | 1 to 93   | IM                     | 1                       | 0.025 (25 µL/kg)    | 40                         | SID; first dose morning of surgery    |
|                     | Rapamycin                    | -12 to 93 | IM                     | 0.01                    | 0.067               | 0.15                       | BID, 12 hr ± 3 hrs apart <sup>b</sup> |

min = minute; IV = intravenous; IM = intramuscular; SID = once daily; BID = twice daily

<sup>a</sup> Including spares for the rapamycin administration.

<sup>b</sup> At approximately the same time each day.

**10.3.1. Methylprednisolone Succinate**

**Dose Route:** Intravenous infusion into a lateral tail vein (or alternate peripheral vein if necessary) using an infusion pump connected to a temporary indwelling catheter (Abbocath®)

Following the end of infusion, the Abbocath® will be flushed with 0.5 mL of 0.9% sodium chloride for injection.

**Frequency:** Once on Day 1 for 30 minutes, prior to dosing (within 4 hours of dosing)

**Infusion Rate:** 1 mL/kg/h

**Method:** The animals will be temporarily restrained for dose administration and will not be sedated.

**10.3.2. Methylprednisolone Acetate**

**Dose Route:** Intramuscular injection into the lateral compartment of the thigh

**Duration:** From Days 1 to Day 93

**Frequency:** Once daily; first dose the morning of dosing (within 4 hours of dosing)

**Method:** The animals will be temporarily restrained for dose administration and will not be sedated.

**10.3.3. Rapamycin**

**Dose Route:** Intramuscular injection into the lateral compartment of the thigh

**Appendix 1**

Duration: From Days -12 to Day 93

Frequency: Twice daily; 12 hr  $\pm$  3 hrs apart (at approximately the same time each day)

Method: Dose formulations will be allowed to warm up at ambient temperature for at least 30 minutes prior to dosing, as appropriate. The animals will be temporarily restrained for dose administration and will not be sedated.

**11. IN-LIFE PROCEDURES, OBSERVATIONS, AND MEASUREMENTS****General In-life Assessments – Main Study Animals**

| <b>Parameter</b>                                     | <b>Frequency</b>                                                                                                     | <b>Comments</b>                                                                                                                                      |
|------------------------------------------------------|----------------------------------------------------------------------------------------------------------------------|------------------------------------------------------------------------------------------------------------------------------------------------------|
| <b>Mortality/<br/>Moribundity Checks<sup>a</sup></b> | Twice daily (morning and afternoon) starting upon arrival through termination.                                       | Animals will be observed within their cage unless removal is necessary for identification or confirmation of possible findings.                      |
| <b>Detailed Clinical Observations<sup>a</sup></b>    | Weekly starting Day -1, and at least every 2 weeks during the prestudy period.                                       | Animals are removed from the cage                                                                                                                    |
| <b>Individual Body Weights<sup>a</sup></b>           | Weekly starting Day -1, and at least every 2 weeks during the prestudy period.                                       | Fasted weight on the day of necropsy. No terminal body weights collected from animals found dead or preterminally euthanized.                        |
| <b>Food Evaluation<sup>a</sup></b>                   | Once daily; from at least Week -1 and throughout the study                                                           | Qualitative                                                                                                                                          |
| <b>Neurological Examinations<sup>a</sup></b>         | Once pretreatment, on Day 1 at 4 to 6 hours postdose, on Days 2, 7 and 28, and at the end of the observation period. | Assessment for general attitude and motor function, postural reactions, and cranial and spinal nerve functions; performed on unanesthetized animals. |

<sup>a</sup> Minimum required frequency for this parameter indicated

**Appendix 1****11.1. Nerve Conductivity Velocity (NCV)**

Frequency: Once prestudy and on Days 45, 77, and 92; to be performed blinded on Days 45, 77, and 92.

Anesthesia: An intramuscular injection of ketamine, glycopyrrolate and dexmedetomidine will be administered following an appropriate fasting period. Following the completion of the assessment, a reversal agent, atipamezole, will be administered if required.

Evaluation: Peroneal motor: NCV and Amplitude  
Sural sensory: NCV and Amplitude  
Cauda equina: Onset latency

**12. CLINICAL PATHOLOGY****12.1. Sample Collection****Clinical Pathology Sample Collection – Main Study Animals**

| Group Nos.                                | Occasion/<br>Time Point | Hematology   | Coagulation    | Clinical<br>Chemistry | Urinalysis                                    | Additional<br>Serum |
|-------------------------------------------|-------------------------|--------------|----------------|-----------------------|-----------------------------------------------|---------------------|
| All animals                               | Pretreatment            | X            | X              | X                     | X                                             | X                   |
| 1 to 3                                    | Day 2                   | X            | X              | X                     | X                                             | X                   |
| 1 to 3                                    | Week 1                  | X            | X              | X                     | X                                             | X                   |
| 1 to 3                                    | Week 2                  | -            | -              | X                     | -                                             | X                   |
| 1 to 3                                    | Week 3                  | -            | -              | X                     | -                                             | X                   |
| 1 to 3                                    | Week 4                  | X            | X              | X                     | X                                             | X                   |
| 1 to 3                                    | Week 8                  | X            | X              | X                     | X                                             | X                   |
| 1 to 3                                    | End of<br>recovery      | X            | X              | X                     | X                                             | X                   |
| Unscheduled euthanasia<br>(when possible) |                         | X            | X              | X                     | -                                             | X                   |
| <b>Overnight Fasting:</b>                 |                         | -            | -              | Yes                   | Yes                                           | -                   |
| <b>Method/Comments:</b>                   |                         | Venipuncture | Venipuncture   | Venipuncture          | morning<br>collection while<br>water deprived | Venipuncture        |
| <b>Target Volume (mL)<sup>a</sup>:</b>    |                         | 0.7          | 1.2            | 0.7                   | As available                                  | 1.2                 |
| <b>Anticoagulant:</b>                     |                         | EDTA         | Sodium citrate | None, in SST          | -                                             | None, in SST        |
| <b>Special Requirements:</b>              |                         | -            | -              | -                     | -                                             | -                   |
| <b>Processing:</b>                        |                         | None         | Plasma         | Serum                 | -                                             | Serum               |

X = Sample to be collected; - = Not applicable; SST = Serum separator tube.

<sup>a</sup> Additional samples may be obtained (e.g., due to clotting of non-serum samples) if permissible sampling frequency and volume are not exceeded.

**Appendix 1****12.2. Hematology****Hematology Parameters**

|                                           |                                  |
|-------------------------------------------|----------------------------------|
| Red blood cell count                      | Platelet count                   |
| Hemoglobin concentration                  | White blood cell count           |
| Hematocrit                                | Neutrophil count (absolute)      |
| Mean corpuscular volume                   | Lymphocyte count (absolute)      |
| Red blood cell distribution width         | Monocyte count (absolute)        |
| Mean corpuscular hemoglobin concentration | Eosinophil count (absolute)      |
| Mean corpuscular hemoglobin               | Basophil count (absolute)        |
| Reticulocyte count (absolute)             | Large unstained cells (absolute) |

A blood smear will be prepared from each hematology sample and may be examined for confirmation of hematology results.

**12.3. Coagulation****Coagulation Parameters**

|                                       |                  |
|---------------------------------------|------------------|
| Activated partial thromboplastin time | Prothrombin time |
| Fibrinogen                            | Sample quality   |

**12.4. Clinical Chemistry****Clinical Chemistry Parameters**

|                              |                        |
|------------------------------|------------------------|
| Alanine aminotransferase     | Total protein          |
| Aspartate aminotransferase   | Albumin                |
| Alkaline phosphatase         | Globulin               |
| Gamma-glutamyltransferase    | Albumin/globulin ratio |
| Creatine kinase              | Glucose                |
| Total bilirubin <sup>a</sup> | Cholesterol            |
| Urea nitrogen                | Triglycerides          |
| Creatinine                   | Sodium                 |
| Calcium                      | Potassium              |
| Phosphorus                   | Chloride               |
|                              | Sample quality         |

<sup>a</sup> When total bilirubin is > 1.0 mg/dL, direct bilirubin will also be measured and indirect bilirubin will be calculated.

**12.5. Urinalysis****Urinalysis Parameters**

|                    |                      |
|--------------------|----------------------|
| Color              | Protein <sup>a</sup> |
| Appearance/Clarity | Glucose <sup>a</sup> |
| Specific gravity   | Bilirubin            |
| Volume             | Ketones              |
| pH                 | Blood                |

<sup>a</sup> Semi-quantitative measurement

**Appendix 1****12.6. Additional Serum Sample Processing**

The samples will be centrifuged and the resultant serum will be separated, transferred to 2 uniquely labeled polypropylene tubes, and frozen immediately over dry ice or in a freezer set to maintain -80°C within 2 hours of collection.

Samples will be shipped to the Sponsor for archival. Analysis, if conducted, will be added by amendment.

**12.7. Bone Marrow Smear Evaluation**

Bone marrow smears will be collected and prepared as described in [Attachment A](#) and may be examined for confirmation of results.

**13. CYTOKINES COLLECTION AND ANALYSIS****Cytokines Sample Collection**

| Group Nos.                             | Time Postdose on Day 1 |        |      |       |
|----------------------------------------|------------------------|--------|------|-------|
|                                        | Predose                | 30 min | 4 hr | 24 hr |
| 1 to 3                                 | X                      | X      | X    | X     |
| Unscheduled euthanasia (when possible) | X                      |        |      |       |
| <b>Method/Comments:</b>                | Venipuncture           |        |      |       |
| <b>Target Volume<sup>a</sup>:</b>      | 0.5                    |        |      |       |
| <b>Anticoagulant:</b>                  | K <sub>2</sub> EDTA    |        |      |       |
| <b>Special Requirements:</b>           | -                      |        |      |       |
| <b>Processing:</b>                     | Plasma                 |        |      |       |

X = Sample to be collected; min = Minute; hr = Hour.

<sup>a</sup> Additional blood samples may be obtained (e.g., due to sample quality) if permissible sampling frequency and blood volume are not exceeded.

**13.1. Cytokine Sample Processing**

The samples will be centrifuged and the resultant plasma will be separated, transferred to 2 uniquely labeled polypropylene tubes (target 1 x 75 µL + leftover), and frozen immediately over dry ice or in a freezer set to maintain -80°C within 2 hours of collection.

**13.2. Cytokine Sample Analysis**

Analysis for cytokines (IL-6, IL-8, IL-10, MCP-1, and TNF-α) will be conducted using a multiplex bead-based method (Luminex). The procedures to be followed during the course of this study along with the assay acceptance criteria will be detailed in CR-SEN analytical procedure AP.BMK.mkpCyt.xx, in which “xx” denotes the version number. The cytokine method was validated under CR-SEN Study No. 3600083, however some cytokines have method limitations when used together in a multiplex panel. These limitations will be taken into consideration and discussed in the interpretative phase report.

IP-10 will also be analyzed using an ELISA assay. The procedures to be followed during the course of this study along with the assay acceptance criteria will be detailed in CR-SEN analytical procedure AP.BMK.mkpIP10.xx, in which “xx” denotes the version number. The

**Appendix 1**

ELISA method was validated under CR-SEN Study No. 3600698. The results from this analysis will also be included in the interpretative report for the cytokines analysis.

**13.3. Bioanalytical Sample Analysis****Bioanalytical Sample Collection - Blood**

| Group Nos.                        | Prestudy     |
|-----------------------------------|--------------|
| 1 to 3                            | X            |
| <b>Method/Comments:</b>           | Venipuncture |
| <b>Target Volume<sup>a</sup>:</b> | 1            |
| <b>Anticoagulant:</b>             | None, in SST |
| <b>Special Requirements:</b>      | None         |
| <b>Processing:</b>                | Serum        |

X = Sample to be collected.

<sup>a</sup> Additional blood samples may be obtained (e.g., due to sample quality) if permissible sampling frequency and blood volume are not exceeded.

The samples will be centrifuged and the resultant serum will be separated, transferred to 2 uniquely labeled polypropylene tubes, and frozen immediately over dry ice or in a freezer set to maintain -80°C.

**Bioanalytical Sample Collection - CSF**

| Group Nos.                       | Predose                            |
|----------------------------------|------------------------------------|
| 1 to 3                           | X                                  |
| <b>Target Volume (mL):</b>       | 1 <sup>a</sup>                     |
| <b>At least 6 hours Fasting:</b> | Yes                                |
| <b>Anticoagulant:</b>            | None, in polypropylene tubes       |
| <b>Special Requirements:</b>     | Placed on wet ice after collection |

X = Sample to be collected.

<sup>a</sup> Split into 2 approximately equal aliquots

The CSF samples will be placed on dry ice and then transferred in a freezer set to maintain -80°C.

Samples will be kept for possible future analysis of anti-AAV9 antibodies using a cell-based neutralizing antibody assay.

**14. TERMINAL PROCEDURES**

Terminal procedures are summarized in the following tables:

**Appendix 1****Replaced, Found Dead, and Unscheduled Euthanasia Animals**

| Animals                               | Necropsy Procedures |                          |               | Histology Processing   | Microscopic Evaluation |
|---------------------------------------|---------------------|--------------------------|---------------|------------------------|------------------------|
|                                       | Necropsy            | Tissue Collection        | Organ Weights |                        |                        |
| Animals replaced prestudy             | X                   | Standard Diagnostic List | -             | -                      | -                      |
| Animals replaced after dosing start   | X                   | Full List <sup>a</sup>   | -             | -                      | -                      |
| Unscheduled deaths after dosing start | X                   | Full List <sup>a</sup>   | -             | Full List <sup>a</sup> | Full List <sup>a</sup> |

**Main Study Animals**

| Group No. | Scheduled Euthanasia Day | Necropsy Procedures |                        |                        | Histology Processing   | Microscopic Evaluation      |
|-----------|--------------------------|---------------------|------------------------|------------------------|------------------------|-----------------------------|
|           |                          | Necropsy            | Tissue Collection      | Organ Weights          |                        |                             |
| 1         | 94                       | X                   | Full List <sup>a</sup> | Full List <sup>a</sup> | Full List <sup>a</sup> | Select Tissues <sup>b</sup> |
| 2         |                          |                     |                        |                        |                        |                             |
| 3         |                          |                     |                        |                        |                        |                             |

X = Procedure to be conducted; - = Not applicable.

<sup>a</sup> See Tissue Weighing, Collection, Processing and Evaluation table in [Attachment A](#) for list of tissues applicable to each procedure.

<sup>b</sup> Brain, spinal cord (cervical, thoracic, lumbar), dorsal root ganglia (cervical, thoracic, lumbar), trigeminal ganglion, draining lymph nodes (deep cervical and iliac), liver, spleen, kidney, heart, skeletal muscle (gastrocnemius and biceps femoris), nerves (optic, sciatic, sural, and tibial).

**14.1. Method of Euthanasia**

Exsanguination by incision of the axillary or femoral arteries following anesthesia by intravenous injection of sodium pentobarbital, unless deemed inappropriate by the Study Director and/or the clinical veterinarian. A sedative, ketamine HCl for injection, USP will be administered by intramuscular injection before animals are transported from the animal room to the necropsy area.

**14.2. Unscheduled Euthanasia**

Main Study animals to be euthanized for humane reasons before the scheduled time will undergo sample collection for evaluation of clinical pathology parameters, cytokine analysis, and bioanalysis, if possible as specified in Section [12.1](#), [13](#), and [14.7](#).

Tissues from animal replaced after the start of dosing will be retained (as per Tissue Collection and Preservation section) and any data generated will not be included in the report unless deemed appropriate by the Study Director.

**14.3. Scheduled Euthanasia**

Main Study animals surviving until scheduled euthanasia will be food deprived overnight. When possible, the animals will be euthanized rotating across dose groups such that similar numbers of animals from each group, including controls, will be necropsied throughout the day.

**Appendix 1****14.4. Necropsy**

Animals as detailed in the [Terminal Procedures](#) table will be subjected to a complete necropsy examination, which will include evaluation of the carcass and musculoskeletal system; all external surfaces and orifices; cranial cavity and external surfaces of the brain; and thoracic, abdominal, and pelvic cavities with their associated organs and tissues. Necropsy examinations will be performed by qualified personnel with appropriate training and experience in animal anatomy and gross pathology. A veterinary pathologist, or other suitably qualified person, will be available for consultation.

Images may be generated for illustration of or consultation on gross observations. These images will not be used for data generation or interpretation, and will not be archived or included in the final report.

**14.5. Organ Weights**

The organs detailed in the [Terminal Procedures](#) and [Tissue Weighing, Collection, Processing and Evaluation \(Attachment A\)](#) tables will be weighed at necropsy. Paired organs will be weighed together. In the event of gross abnormalities, in addition to the combined weight, the weight of each organ of a pair may be taken and entered as a tissue comment. Organ weight as a percent of body weight (using the terminal body weight) and organ weight as a percent of brain weight will be calculated.

**14.6. Tissue Collection and Preservation**

Representative samples of tissues will be collected and preserved in 10% neutral buffered formalin, except for tissues requiring alternate fixatives as defined by standard operating procedures, as detailed in the [Terminal Procedures](#) and [Tissue Weighing, Collection, Processing and Evaluation \(Attachment A\)](#) tables. Additional tissue samples may be collected to elucidate abnormal findings.

**14.7. Tissue Collection for Histopathology, Biodistribution, and Gene Expression Bioanalysis**

For all animals, 3 samples of 4x4x4 mm each as applicable, except for testis/ovary, nerve optic and trigeminal ganglion where 1 sample will be collected and DRG where 2 samples/segment will be collected where possible, of the spinal cord (cervical, lumbar, and thoracic), dorsal root ganglia (cervical, lumbar, and thoracic), liver, spleen, kidney, lung, skeletal muscles (gastrocnemius and biceps femoris), optic nerve, sciatic nerve, tibial nerve, trigeminal ganglion, testis/ovary, thymus, and heart will be collected, weighed, placed in PCR clean polypropylene tubes, flash frozen in liquid nitrogen, placed on dry ice, and transferred to a freezer set to maintain -80°C until shipment. Clean removal techniques will be used.

For all animals, the brain (cerebellum, hippocampus, cortex [frontal, parietal, occipital, and temporal lobes], striatum, thalamus, midbrain, pons, medulla) of each animal in all groups will be sectioned at 4-mm coronal slice thickness (see [Attachment B](#)) using clean removal technique.

## Appendix 1

The second slice and every other slice thereafter will be fixed in 10% neutral buffered formalin for histopathological evaluation. The third slice and every other slice thereafter will be used to collect tissue punches (8 x 8 x 4 mm, when possible) for bioanalysis (BA) according to the table in Section 14.8. The sampling of brain slices for histopathology and BA analysis is summarized in Attachment D. All punches for BA will be weighed (before freezing). Tissue punches for BA will be placed in PCR clean vials, flash frozen in liquid nitrogen, placed on dry ice and stored at -80°C until analysis.

When possible, the order of tissue collection will be as follows: spleen, liver, kidney, brain then remaining tissues.

Tissues for histopathology will be collected prior to sample collection for any other parameters.

The samples will be shipped to the University of Texas Southwestern Medical Center, see [Attachment B](#). The bioanalytical laboratory will be notified before shipment of the samples. Samples will be stored at the bioanalytical laboratory in a freezer set to maintain -60°C or below until analysis.

Samples will be analyzed for vector genome biodistribution and transgene expression by qPCR. All analytical work will be conducted by the Sponsor, using an analytical method developed and qualified by that laboratory.

### 14.8. Tissue Collection for Histopathology, Biodistribution, and Gene Expression Bioanalysis

**Tissue Collection - Brain**

| Slice # | Punch # | Description      | Hemisphere |
|---------|---------|------------------|------------|
| 3       | 1       | Frontal Cortex   | Right      |
| 3       | 2       | Frontal Cortex   | Left       |
| 7       | 3       | Striatum         | Right      |
| 7       | 4       | Striatum         | Left       |
| 9       | 5       | Parietal Cortex  | Right      |
| 9       | 6       | Parietal Cortex  | Left       |
| 9       | 7       | Temporal cortex  | Right      |
| 9       | 8       | Temporal cortex  | Left       |
| 9       | 9       | Hippocampus      | Right      |
| 9       | 10      | Hippocampus      | Left       |
| 9       | 11      | Thalamus         | Right      |
| 9       | 12      | Thalamus         | Left       |
| 11      | 13      | Pons             | Right      |
| 11      | 14      | Pons             | Left       |
| 11      | 15      | Midbrain         | Right      |
| 11      | 16      | Midbrain         | Left       |
| 13      | 17      | Medulla          | Right      |
| 13      | 18      | Medulla          | Left       |
| 15      | 19      | Cerebellum       | Right      |
| 15      | 20      | Cerebellum       | Left       |
| 15      | 21      | Occipital Cortex | Right      |

**Appendix 1**

|    |    |                  |      |
|----|----|------------------|------|
| 15 | 22 | Occipital Cortex | Left |
|----|----|------------------|------|

Slice #, Punch # and Description based on Attachment B and D.

**14.9. Splenocyte Sample Collection Analysis**

The spleen will be collected using cell culture clean procedures from all animals at scheduled necropsy. Dissected spleens, a sample of approximately 1x1cm, weighed will be placed into prechilled tubes containing RPMI media and stored at 2°C to 8°C or on wet ice before processing to splenocytes. Splenocytes will then be cryopreserved/frozen until analysis.

Samples will be processed at ambient temperature according to standard CR-SEN SOP and analytical procedure AP.5550014.SPL.xx (where xx denote the version of the procedure), except that all washes will be performed with RPMI-1640 Media and samples will be frozen as follows:

Prepare a sufficient number of 2 mL cryovials to hold the cells at 2e7 cells/mL. Open the vials and add 100 µL of Hybridoma-Grade DMSO (Freezing media is 90% heat-inactivated FBS and 10 % DMSO). Add sufficient heat-inactivated FBS to the cell pellet to put the cells at 2e7/mL when added to the DMSO. Gently resuspend the pellet via pipetting and then add to the tubes containing DMSO. The act of addition and higher density of FBS will mix the FBS and DMSO yielding an evenly distributed freezing media. 1-2 gentle inversions can be used to assure even mixing. If adequate splenocytes are available, 3 aliquots of cells at 2e7/mL will be prepared for each animal. Splenocytes will be stored in the vapor phase of liquid nitrogen until shipped to the Sponsor on dry ice. See [Attachment C](#) for shipping details.

The splenocytes will be analyzed for T-cell responses against AAV9 and AP4M1 using an ELISpot assay. All analytical work will be conducted by the Sponsor, using an analytical method developed and qualified by that laboratory.

**15. MICROSCOPIC EVALUATION****15.1. Histology**

Tissues in the [Terminal Procedures](#) and [Tissue Weighing, Collection, Processing and Evaluation \(Attachment A\)](#) tables from animals identified in the [Terminal Procedures](#) table will be embedded in paraffin, sectioned, mounted on glass slides, and stained with hematoxylin and eosin.

**15.2. Microscopic Evaluation**

Tissues as detailed in the [Terminal Procedures](#) and [Tissue Weighing, Collection, Processing and Evaluation \(Attachment A\)](#) tables will be evaluated histopathologically by a veterinary pathologist with training and experience in laboratory animal pathology.

IBA-1, GFAP (glial fibrillary acidic protein) and Fluoro-Jade B staining will be performed on the lumbar spinal cord and the lumbar DRGs for all animals at scheduled and unscheduled termination.

**Appendix 1**

Immunohistochemistry (IHC) will be performed on the lumbar spinal cord and the lumbar DRGs for all animals at scheduled and unscheduled termination. These slides will be stained for IBA-1, GFAP (glial fibrillary acidic protein) and Fluoro-Jade B and used to identify microglial cells (IBA-1) and astrocytes (GFAP). Immunohistochemistry staining for IBA-1 and GFAP will be detailed in staining procedures HISP.5550014.IBA1.xx and HISP.5550014.GFAP.xx respectively (where xx denotes the version number).

Special stains may be used at the discretion of the pathologist to further characterize lesions and changes identified during routine evaluation of individual animals. Any special stains will be documented in the individual animal data. Any additional stains or evaluations, if deemed necessary by the pathologist, may be added by study plan amendment following discussion with the Study Director and in consultation the Sponsor. Efforts will be made to evaluate all study plan-required tissues microscopically; however, it is not always feasible for every study plan-required tissue to be present on every slide. Study plan-required tissues that are not examined will be documented in the histopathology data and the impact of these missing tissues on the study will be documented in the pathology report.

Images may be generated for illustration of or consultation on histological observations. These images will not be used for data generation or interpretation, and will not be archived or included in the Final Report.

**15.3. Pathology Peer Review**

A pathology peer review, will be conducted by:

|              |                                                                 |
|--------------|-----------------------------------------------------------------|
| Peer Review  | Andre-Jean Lambert, DVM, DES, Vet Pathol, DACVP                 |
| Pathologist: | Charles River Laboratories Montreal ULCSenneville Site (CR-SEN) |
|              | Address as cited for Test Facility                              |
|              | Tel: 514.630.8200, ext 2659                                     |
|              | E-mail: andre-jean.lambert@crl.com                              |

~~Histopathology slides will be shipped to the pathologist, see [Attachment C](#) for shipping details.~~

The peer review statement or equivalent documentation will be included as an appendix to the Final Report.

**16. STATISTICAL ANALYSIS**

Data will be presented as individual values by animal, except for the following.

Means and standard deviations (sexes pooled) will be calculated for NCV data.

**16.1. Constructed Variables**

|                      |                                                                                                                             |
|----------------------|-----------------------------------------------------------------------------------------------------------------------------|
| Body Weight Changes: | Calculated between each scheduled interval as well as between the following intervals: from beginning to end of each phase. |
|----------------------|-----------------------------------------------------------------------------------------------------------------------------|

**Appendix 1**

Organ Weight Relative to Body Weight: Calculated against the terminal body weight for scheduled intervals.

Organ Weight Relative to Brain Weight: Calculated against the brain weight for scheduled intervals.

Additional or alternative body weight intervals may be evaluated to elucidate study results at the discretion of the Study Director.

**17. COMPUTERIZED SYSTEMS**

The following critical computerized systems may be used in the study. The actual computerized systems will be documented in the study data and/or the Final Report.

**Critical Computerized Systems**

| <b>System Name</b>                                                                                         | <b>Description of Data Collected and/or Analyzed</b>                                                                                                                                            |
|------------------------------------------------------------------------------------------------------------|-------------------------------------------------------------------------------------------------------------------------------------------------------------------------------------------------|
| Provantis®                                                                                                 | In-life; clinical pathology; postmortem; Test Material receipt, accountability and/or formulation activities                                                                                    |
| Deviation Information Library                                                                              | Deviations                                                                                                                                                                                      |
| Share Document Management System                                                                           | Reporting                                                                                                                                                                                       |
| M-Files®                                                                                                   | Reporting and collection of 21 CFR Part 11 compliant signature                                                                                                                                  |
| eInfotree                                                                                                  | Excel Module for collection of 21 CFR Part 11 compliance requirements, security, audit trail, and electronic signatures                                                                         |
| DocuSign™                                                                                                  | Collection of 21 CFR Part 11 compliant signature                                                                                                                                                |
| SRS (CR-SEN in-house application built with SAS) and/or in-house reporting software Nevis 2012 (using SAS) | Cytokines                                                                                                                                                                                       |
| Mesa Laboratories AmegaView CMS                                                                            | Continuous Monitoring System. Monitoring of standalone fridges, freezers, incubators, and selected laboratories to measure temperature, relative humidity, and CO <sub>2</sub> , as appropriate |
| Johnson Controls Metasys                                                                                   | Building Automation System. Control of HVAC and other building systems, as well as temperature/humidity control and trending in selected laboratories and animal rooms                          |
| Watson LIMS                                                                                                | Sample management and data regression for cytokines assessment                                                                                                                                  |
| Bio Plex Manager (Luminex)                                                                                 | Data collection for Cytokines                                                                                                                                                                   |
| Softmax Pro GxP                                                                                            | Data collection for Cytokines                                                                                                                                                                   |
| StatLia                                                                                                    | Data collection for Cytokines                                                                                                                                                                   |
| AcqKnowledge                                                                                               | Electrophysiological recording for nerve conduction velocity                                                                                                                                    |
| Excel                                                                                                      | Tabulated data entry for nerve conduction velocity                                                                                                                                              |
| SRS (CR-SEN in-house application built with SAS)                                                           | Table formatting for nerve conduction velocity                                                                                                                                                  |

Data for parameters not required by the Study Plan, which are automatically generated by analytical devices used will be retained on file but not reported. Statistical analysis results that

**Appendix 1**

are generated by the program but are not required by the Study Plan and/or are not scientifically relevant will be retained on file but will not be included in the tabulations.

**18. REGULATORY COMPLIANCE**

The study will be performed in accordance with the OECD Principles of Good Laboratory Practice and as accepted by Regulatory Authorities throughout the European Union, United States of America (FDA), Japan (MHLW), and other countries that are signatories to the OECD Mutual Acceptance of Data Agreement.

Exceptions to GLPs include the following study elements:

- Characterization of the test and reference items will be/were performed by the Sponsor or Sponsor subcontractor according to established SOPs, controls, and approved test methodologies to ensure integrity and validity of the results generated; these analyses will not be/were not conducted in compliance with the GLP or GMP regulations.
- Stability testing of the supplied test and reference items will be/was performed by the Sponsor or Sponsor subcontractor according to established SOPs, controls, and approved test methodologies to ensure integrity and validity of the results generated; these analyses will not be/were not conducted in compliance with the GLP or GMP regulations.
- Concentration and homogeneity of the test and reference item formulations will not be determined in this study.
- Tissue bioanalysis, gene expression, and splenocyte analysis will not be conducted in compliance with GLP regulations.
- Nerve conduction velocity (NCV) will be performed using scientifically sound but non-validated methodologies.

**19. QUALITY ASSURANCE****19.1. Test Facility**

The Test Facility Quality Assurance Program (QAP) will monitor the study to assure the facilities, equipment, personnel, methods, practices, records, and controls are in conformance with Good Laboratory Practice regulations. The QAP will review the Study Plan, conduct inspections at intervals adequate to assure the integrity of the study, and audit the Final Report to assure that it accurately describes the methods and standard operating procedures and that the reported results accurately reflect the raw data of the study.

**20. AMENDMENTS AND DEVIATIONS**

Changes to the approved Study Plan shall be made in the form of an amendment, which will be signed and dated by the Study Director. Every reasonable effort will be made to discuss any necessary study plan changes in advance with the Sponsor. The Study Director will notify the Sponsor of deviations that may result in a significant impact on the study as soon as possible.

**Appendix 1****21. RETENTION AND DISPOSITION OF RECORDS, SAMPLES, AND SPECIMENS**

All study-specific raw data, electronic data, documentation, study plan (and amendments, if any), retained samples and specimens, and interim (if applicable) and final reports will be archived by no later than the date of final report issue. All materials generated by Charles River from this study will be transferred to a Charles River archive. At least 1 year after issue of the Draft Report, the Sponsor will be contacted.

Disposition of residual/retained analytical samples will be as described in the table below.

**Disposition of Residual/Retained Samples**

| Sample Type                                      | Disposition             | Schedule                                                                                                                                                                                                                                                                         |
|--------------------------------------------------|-------------------------|----------------------------------------------------------------------------------------------------------------------------------------------------------------------------------------------------------------------------------------------------------------------------------|
| <u>Cytokine</u>                                  | <u>Discard</u>          | <u>Samples will be maintained for a maximum of 6 months following issuance of the first full Draft Report after which samples will be managed as defined in the 'Disposition' column as requested and authorized by the Study Director and in consultation with the Sponsor.</u> |
| <u>Splenocytes</u>                               |                         |                                                                                                                                                                                                                                                                                  |
| <u>Additional Serum</u>                          | Archived by the Sponsor | Samples to be archived by the Sponsor                                                                                                                                                                                                                                            |
| Bioanalytical ( <u>blood, CSF, and tissues</u> ) |                         |                                                                                                                                                                                                                                                                                  |
| Frozen tissues                                   |                         |                                                                                                                                                                                                                                                                                  |

Records to be maintained will include, but will not be limited to, documentation and data for the following:

- Deviations, study plan, and study plan amendments
- Study schedule
- Study-related correspondence
- Test system receipt, health, and husbandry
- Test and reference item receipt, identification, preparation, and analysis
- In-life measurements and observations
- Clinical pathology sample collection and evaluation
- Cytokine sample collection and evaluation
- Gross and microscopic observations and related data
- Organ weight measurements
- Statistical analysis results

**• STUDY CLASSIFICATION**

Study Category: Toxicology  
Study Type: Single Dose Toxicity  
Study Design: Parallel  
Primary Treatment CAS: Not Available  
Registry Number:

**Appendix 1**

Primary Treatment Unique      Not Available  
Ingredient ID:

Class of Compound:              AAV9 Vector

Administration Dose Form:      Solution

**22. REPORTING**

A comprehensive Draft Report will be prepared following completion of the study and will be finalized following consultation with the Sponsor. The report will include a summary of the experimental methods and all information necessary to provide a complete and accurate description of the results and any circumstances that may have affected the quality or integrity of the study.

The Sponsor will receive an electronic version of the Draft and Final Report provided in Adobe Acrobat PDF format (hyperlinked and searchable) along with a Microsoft Word version of the text. The PDF document will be created from native electronic files to the extent possible, including text and tables generated by the Test Facility. Report components not available in native electronic files and/or original signature pages will be scanned and converted to PDF image files for incorporation.

Reports should be finalized within 6 months of issue of the Draft Report. If the Sponsor has not provided comments to the report within 6 months of draft issue, the report will be finalized by the Test Facility unless other arrangements are made by the Sponsor.

**23. JUSTIFICATIONS AND GUIDELINES****23.1. Justification of Test System and Number of Animals**

At this time, studies in laboratory animals provide the best available basis for extrapolation to humans and are required to support regulatory submissions. Acceptable models that do not use live animals currently do not exist.

The cynomolgus monkey was chosen as the animal model for this study as it is an accepted nonrodent species for nonclinical toxicity testing by regulatory agencies.

The total number of animals to be used in this study is considered to be the minimum required to properly characterize the effects of the test item. This study has been designed such that it does not require an unnecessary number of animals to accomplish its objectives.

**23.2. Justification of Route and Dose Levels**

The intrathecal route of exposure was selected because this is the intended route of human exposure.

The dose levels were selected based on information provided by the Sponsors' prior studies with AAV9/AP4M1 in mice and rats (CRL-SEN Study No. 5550008), as well as prior pharmacology for other similar AAV9 vectors in mice, rats, pigs, and nonhuman primates. Based on those prior

**Appendix 1**

pharmacology studies, the chosen low dose is anticipated to provide efficacy in ongoing mouse studies which should translate to humans. No clear dose-limiting toxicities were observed at doses equivalent to the low or high dose in mice. At one year postdose, 3 out of 10 mice receiving the high dose had hepatocellular adenoma, which could have been caused by the test item. The low dose in this NHP study corresponds to a nearly maximum feasible dose (MFD) due to limitations on injection volume and test item concentration, and this is the target dose for human translation. A 2x higher dose is achieved using a higher injection volume, and is included to evaluate a possible safety margin. None of the doses are expected to generate more than a minimal to moderate toxic effect. If any adverse effects are observed, the range of doses in the study design is an attempt to produce a graded response.

**23.3. Guidelines for Study**

The design of this study was based on the study objective(s) and the overall product development strategy for the test item, and on the following study design guidelines.

- ICH Harmonised Tripartite Guideline S6 (R1). *Preclinical Safety Evaluation of Biotechnology-Derived Pharmaceuticals*.
- Japanese Guidelines for Nonclinical Studies of Drugs Manual (1995). *Guidelines for Toxicity Studies of Drugs (Chapter 2, Single Dose Toxicity Study)*.

**24. ANIMAL WELFARE**

The Study Plan and any amendment(s) or procedures involving the care and use of animals in this study will be reviewed and approved by CR-SEN Institutional Animal Care and Use Committee (IACUC). During the study, the care and use of animals will be conducted with guidance from the USA National Research Council and the Canadian Council on Animal Care (CCAC).

**25. REFERENCES**

Office of Laboratory Animal Welfare. *Public Health Services Policy on Humane Care and Use of Laboratory Animals*. Bethesda, MD: National Institutes of Health. Current edition.

**Appendix 1**

**TEST FACILITY APPROVAL**

All electronic signatures appear at the end of the document upon finalization.

**Appendix 1**

**SPONSOR APPROVAL**

The Study Plan Amendment was approved by the Sponsor by e-mail on the date designated below. The correspondence giving approval will be archived, as appropriate with other Sponsor communications.

21 Dec 2021

---

Date of Sponsor Approval

**Appendix 1****ATTACHMENT A****Tissue Weighing, Collection, Processing, and Evaluation Table**

| <b>Organ</b>                                                                                                   | <b>Weigh</b>   | <b>Macroscopic Evaluation and Collection</b> | <b>Histology Processing</b> | <b>Microscopic Evaluation</b> | <b>Bioanalysis</b>                                                                                                                  |
|----------------------------------------------------------------------------------------------------------------|----------------|----------------------------------------------|-----------------------------|-------------------------------|-------------------------------------------------------------------------------------------------------------------------------------|
| Animal ID                                                                                                      | -              | X                                            | -                           | -                             | -                                                                                                                                   |
| Artery, aorta                                                                                                  | -              | X                                            | X                           | -                             | -                                                                                                                                   |
| Bone marrow, sternum                                                                                           | -              | X                                            | X                           | -                             | -                                                                                                                                   |
| Bone marrow smear                                                                                              | -              | X <sup>a</sup>                               | -                           | -                             | -                                                                                                                                   |
| Bone, femur, right                                                                                             | -              | X                                            | X                           | -                             | -                                                                                                                                   |
| Bone, sternum                                                                                                  | -              | X                                            | X                           | -                             | -                                                                                                                                   |
| Brain                                                                                                          | X              | X                                            | X                           | X                             | X (cerebellum, hippocampus, cortex (frontal, parietal, occipital, and temporal lobes), striatum, thalamus, midbrain, pons, medulla) |
| Epididymis                                                                                                     | X (2)          | X (2)                                        | X (2)                       | -                             | -                                                                                                                                   |
| Esophagus                                                                                                      | -              | X                                            | X                           | -                             | -                                                                                                                                   |
| Eye                                                                                                            | -              | X (2)                                        | X (2)                       | -                             | -                                                                                                                                   |
| Gallbladder                                                                                                    | - <sup>b</sup> | X                                            | X                           | -                             | -                                                                                                                                   |
| Ganglion, dorsal root (DRG), (cervical, lumbar, and thoracic with dorsal and ventral nerve roots) <sup>f</sup> | -              | X (2)                                        | X (2)                       | X (2)                         | Refer to ATTACHMENT E                                                                                                               |
| Ganglion, trigeminal                                                                                           | -              | X                                            | X (left)                    | X (left)                      | X (right)                                                                                                                           |
| Gland, adrenal                                                                                                 | X (2)          | X (2)                                        | X (2)                       | -                             | -                                                                                                                                   |
| Gland, lacrimal                                                                                                | -              | X (2)                                        | -                           | -                             | -                                                                                                                                   |
| Gland, mammary                                                                                                 | -              | X                                            | X                           | -                             | -                                                                                                                                   |
| Gland, parathyroid                                                                                             | - <sup>c</sup> | X (2)                                        | X (2)                       | -                             | -                                                                                                                                   |
| Gland, pituitary                                                                                               | X              | X                                            | X                           | -                             | -                                                                                                                                   |
| Gland, prostate                                                                                                | X              | X                                            | X                           | -                             | -                                                                                                                                   |
| Gland, salivary, submandibular                                                                                 | -              | X (2)                                        | X (1)                       | -                             | -                                                                                                                                   |
| Gland, salivary, sublingual                                                                                    | -              | X (2)                                        | -                           | -                             | -                                                                                                                                   |
| Gland salivary, parotid                                                                                        | -              | X (2)                                        | -                           | -                             | -                                                                                                                                   |
| Gland, seminal vesicle                                                                                         | -              | X (2)                                        | X (2)                       | -                             | -                                                                                                                                   |
| Gland, thyroid                                                                                                 | X (2)          | X (2)                                        | X (2)                       | -                             | -                                                                                                                                   |
| Gut-associated lymphoid tissue <sup>d</sup>                                                                    | -              | X                                            | X                           | -                             | -                                                                                                                                   |
| Heart                                                                                                          | X              | X                                            | X                           | X                             | X                                                                                                                                   |
| Joint, femorotibial, right                                                                                     | -              | X                                            | X                           | -                             | -                                                                                                                                   |
| Kidney                                                                                                         | X (2)          | X (2)                                        | X (2)                       | X (2)                         | X (right)                                                                                                                           |
| Large intestine, cecum                                                                                         | -              | X                                            | X                           | -                             | -                                                                                                                                   |
| Large intestine, colon                                                                                         | -              | X                                            | X                           | -                             | -                                                                                                                                   |
| Large intestine, rectum                                                                                        | -              | X                                            | X                           | -                             | -                                                                                                                                   |

**Appendix 1**

| <b>Organ</b>                                                                        | <b>Weight</b> | <b>Macroscopic Evaluation and Collection</b> | <b>Histology Processing</b> | <b>Microscopic Evaluation</b> | <b>Bioanalysis</b>         |
|-------------------------------------------------------------------------------------|---------------|----------------------------------------------|-----------------------------|-------------------------------|----------------------------|
| Liver                                                                               | X             | X                                            | X                           | X                             | X (left lateral)           |
| Lung                                                                                | -             | X                                            | X                           | -                             | X                          |
| Lymph node(s) draining administration site(s): deep cervical and iliac              | -             | X (2)                                        | X (2)                       | X (2)                         | -                          |
| Lymph node, mandibular                                                              | -             | X (2)                                        | X (1)                       | -                             | -                          |
| Lymph node, mesenteric                                                              | -             | X                                            | X                           | -                             | -                          |
| Muscle, skeletal, gastrocnemius                                                     | -             | X (2)                                        | X (2)                       | X (2)                         | X (1, right)               |
| Muscle, skeletal, biceps femoris                                                    | -             | X (2)                                        | X (2)                       | X (2)                         | X (1, right)               |
| Nerve, optic                                                                        | -             | X (2)                                        | X (2)                       | X (2)                         | X (1, right)               |
| Nerve, sciatic                                                                      | -             | X (2)                                        | X (2)                       | X (2)                         | X (1, right)               |
| Nerve, sural                                                                        | -             | X (2)                                        | X (2)                       | X (2)                         | -                          |
| Nerve, tibial                                                                       | -             | X (2)                                        | X (2)                       | X (2)                         | X (1, right)               |
| Ovary                                                                               | X (2)         | X (2)                                        | X (2)                       | -                             | X (1, right)               |
| Oviduct                                                                             | -             | X (2)                                        | -                           | -                             | -                          |
| Pancreas                                                                            | -             | X                                            | X                           | -                             | -                          |
| Skin                                                                                | -             | X                                            | X                           | -                             | -                          |
| Small intestine, duodenum                                                           | -             | X                                            | X                           | -                             | -                          |
| Small intestine, ileum                                                              | -             | X                                            | X                           | -                             | -                          |
| Small intestine, jejunum                                                            | -             | X                                            | X                           | -                             | -                          |
| Spinal cord (cervical, lumbar, and thoracic, including injection site) <sup>e</sup> | -             | X                                            | X                           | X                             | X<br>Refer to ATTACHMENT E |
| Spleen                                                                              | X             | X                                            | X                           | X                             | X                          |
| Stomach                                                                             | -             | X                                            | X                           | -                             | -                          |
| Testis                                                                              | X (2)         | X (2)                                        | X (2)                       | -                             | X (1, right)               |
| Thymus                                                                              | X             | X                                            | X                           | -                             | X                          |
| Tongue                                                                              | -             | X                                            | X                           | -                             | -                          |
| Trachea                                                                             | -             | X                                            | X                           | -                             | -                          |
| Ureter                                                                              | -             | X (2)                                        | -                           | -                             | -                          |
| Urinary bladder                                                                     | -             | X                                            | X                           | -                             | -                          |
| Uterus/Cervix                                                                       | X             | X                                            | X                           | -                             | -                          |
| Vagina                                                                              | -             | X                                            | X                           | -                             | -                          |

**Appendix 1**

| <b>Organ</b> | <b>Weigh</b> | <b>Macroscopic<br/>Evaluation<br/>and<br/>Collection</b> | <b>Histology<br/>Processing</b> | <b>Microscopic<br/>Evaluation</b> | <b>Bioanalysis</b> |
|--------------|--------------|----------------------------------------------------------|---------------------------------|-----------------------------------|--------------------|
|--------------|--------------|----------------------------------------------------------|---------------------------------|-----------------------------------|--------------------|

X = Procedure to be conducted. - = Not applicable. (1) = one side. (2) = both sides.

**~~Macroscopic abnormalities in the organs listed and in other organs will be sampled at necropsy, processed for histology and examined microscopically.~~**

- <sup>a</sup> Bone marrow smears will be collected from the 5th to 7th rib at scheduled and unscheduled necropsies (for possible examination). Smears will not be collected from animals that are found dead or from animals that were euthanized moribund and then stored in the refrigerator prior to necropsy. Bone marrow smears are allowed to air dry and are not fixed in formalin.
- <sup>b</sup> Weigh with liver.
- <sup>c</sup> Weigh with gland, thyroid.
- <sup>d</sup> From small intestine: Peyer's patch or solitary lymphoid follicle.
- <sup>e</sup> Transverse and/or oblique sections.
- <sup>f</sup> Nerve roots will be examined if present in section of dorsal root ganglia.

**Appendix 1****ATTACHMENT B****Brain Collection Procedure**

1. The brain matrix to be used will be chilled in a saline ice bath. Following collection of the brain, it will be placed in the matrix in the ice bath for approximately 10 minutes to firm up the tissue prior to processing
2. The brain slicing will be performed as per diagram below:

**Slice number**

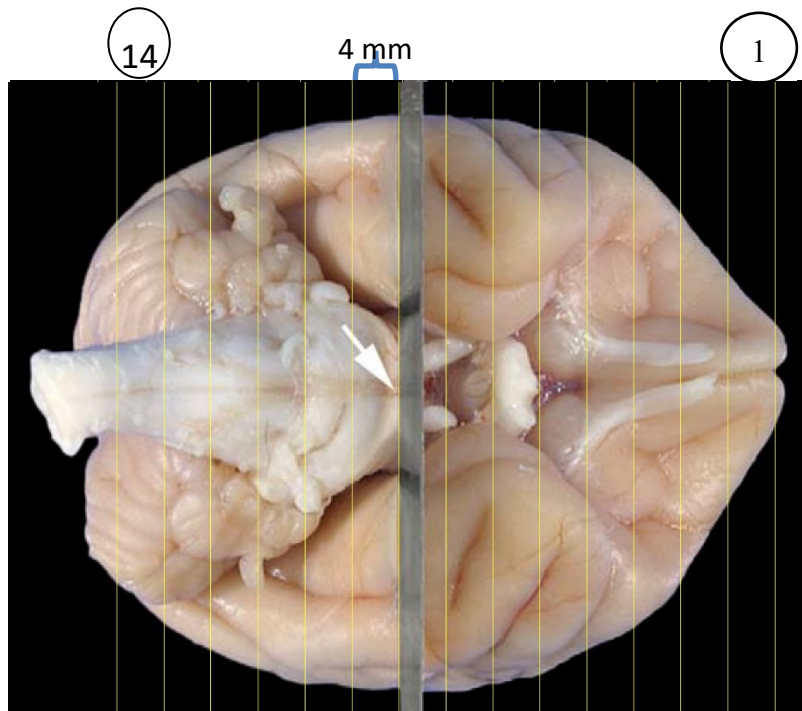

**NOTE:** The initial razor cut should be consistent for all specimens (i.e. start from rostral to pons), with all subsequent slices taken 4mm apart. The starting location for slicing will be recorded with in the study data.

3. Following complete sectioning of the brain within the matrix, the brain will be carefully removed and each individual brain slab will be laid out flat in consecutive order, with the caudal face of each slab oriented against the table/bench (rostral face of each slice will be face up).
4. Each brain slab will then be cut sagittally, to separate the hemispheres Right and Left.
5. Each hemisphere from alternative slabs will then be punched as per Sections 14.7 and 14.8 and Attachment D, and the remaining tissue from both hemispheres will be frozen flat indirectly on dry ice, then placed flat into appropriately sized cassettes labeled with group number, animal number and brain section number and stored at -80°C. Alternate slabs will be subdivided and

**Appendix 1**

placed into appropriately sized cassettes labeled with group number, animal number and brain section number and placed in 10% NBF.

**Appendix 1****ATTACHMENT C****Shipment of Samples and Study Records**

| <b>Matrix</b>                 | <b>Purpose</b>                        | <b>Day/<br/>Week/<br/>Aliquot</b> | <b>Proposed<br/>Shipment<br/>Date</b> | <b>Conditions<br/>for<br/>Shipment</b> | <b>Recipient/Address</b>                                                                                                                                                                                                                                             |
|-------------------------------|---------------------------------------|-----------------------------------|---------------------------------------|----------------------------------------|----------------------------------------------------------------------------------------------------------------------------------------------------------------------------------------------------------------------------------------------------------------------|
| Bulk test item                | Return to<br>Sponsor                  | Not<br>applicable                 | Following<br>completion<br>of dosing  | Dry ice                                | Attention to:<br>Steven Gray, PhD<br>University of Texas Southwestern Medical<br>Center<br>NA2.508<br>5323 Harry Hines Blvd<br>University of Texas Southwestern Medical<br>Center<br>Dallas, TX 75390<br>Tel: 214-648-0670<br>E-mail: steven.gray@UTSouthwestern.edu |
| Residual Dose<br>Formulations |                                       |                                   |                                       |                                        |                                                                                                                                                                                                                                                                      |
| Additional<br>Serum           | Archival                              | Not<br>applicable                 | Following<br>the last<br>collection   | Dry ice                                | Attention to:<br>Juan A. Rodriguez<br>University of Texas Southwestern 5901<br>Forest Park Rd,<br>NA2.508 Receiving – North Campus Dock<br>Dallas, TX 75390<br>Tel: 281-380-5165 E-mail:<br>Juan.Rodriguez@UTSouthwestern                                            |
| Tissues                       | Bioanalysis                           | Not<br>applicable                 | Within 2<br>weeks from<br>collection  | Dry ice                                | Attention to:<br>Juan A. Rodriguez<br>University of Texas Southwestern 5901<br>Forest Park Rd,<br>NA2.508 Receiving – North Campus Dock<br>Dallas, TX 75390<br>Tel: 281-380-5165 E-mail:<br>Juan.Rodriguez@UTSouthwestern                                            |
| Splenocytes                   | Tissue gene<br>expression<br>Analysis | Not<br>applicable                 | Following<br>the last<br>collection   | Dry ice                                | Attention to:<br>Steven Gray, PhD<br>University of Texas Southwestern Medical<br>Center<br>NA2.508<br>5323 Harry Hines Blvd<br>University of Texas Southwestern Medical<br>Center<br>Dallas, TX 75390<br>Tel: 214-648-0670<br>E-mail: steven.gray@UTSouthwestern.edu |

Alternate shipping details may be provided thereafter and will be documented in study correspondence.



**Appendix 1**

**ATTACHMENT D**

**Brain Collection Procedure**

**BRAIN SAMPLING FOR HISTOLOGY AND BIOANALYSIS**

From the left hemisphere of the brain, 12 sections (white rectangles) will be selected for histopathology. From both hemispheres, samples for bioanalysis (dashed rectangles) will be collected as described in Section 14.8. The following images are to be used as a guideline only, and slight variations may occur.

Abbreviation list: P.C.: Parietal Cortex; T.C.: Temporal Cortex; Thal.: Thalamus; Hipp.: Hippocampus.

RIGHT

LEFT

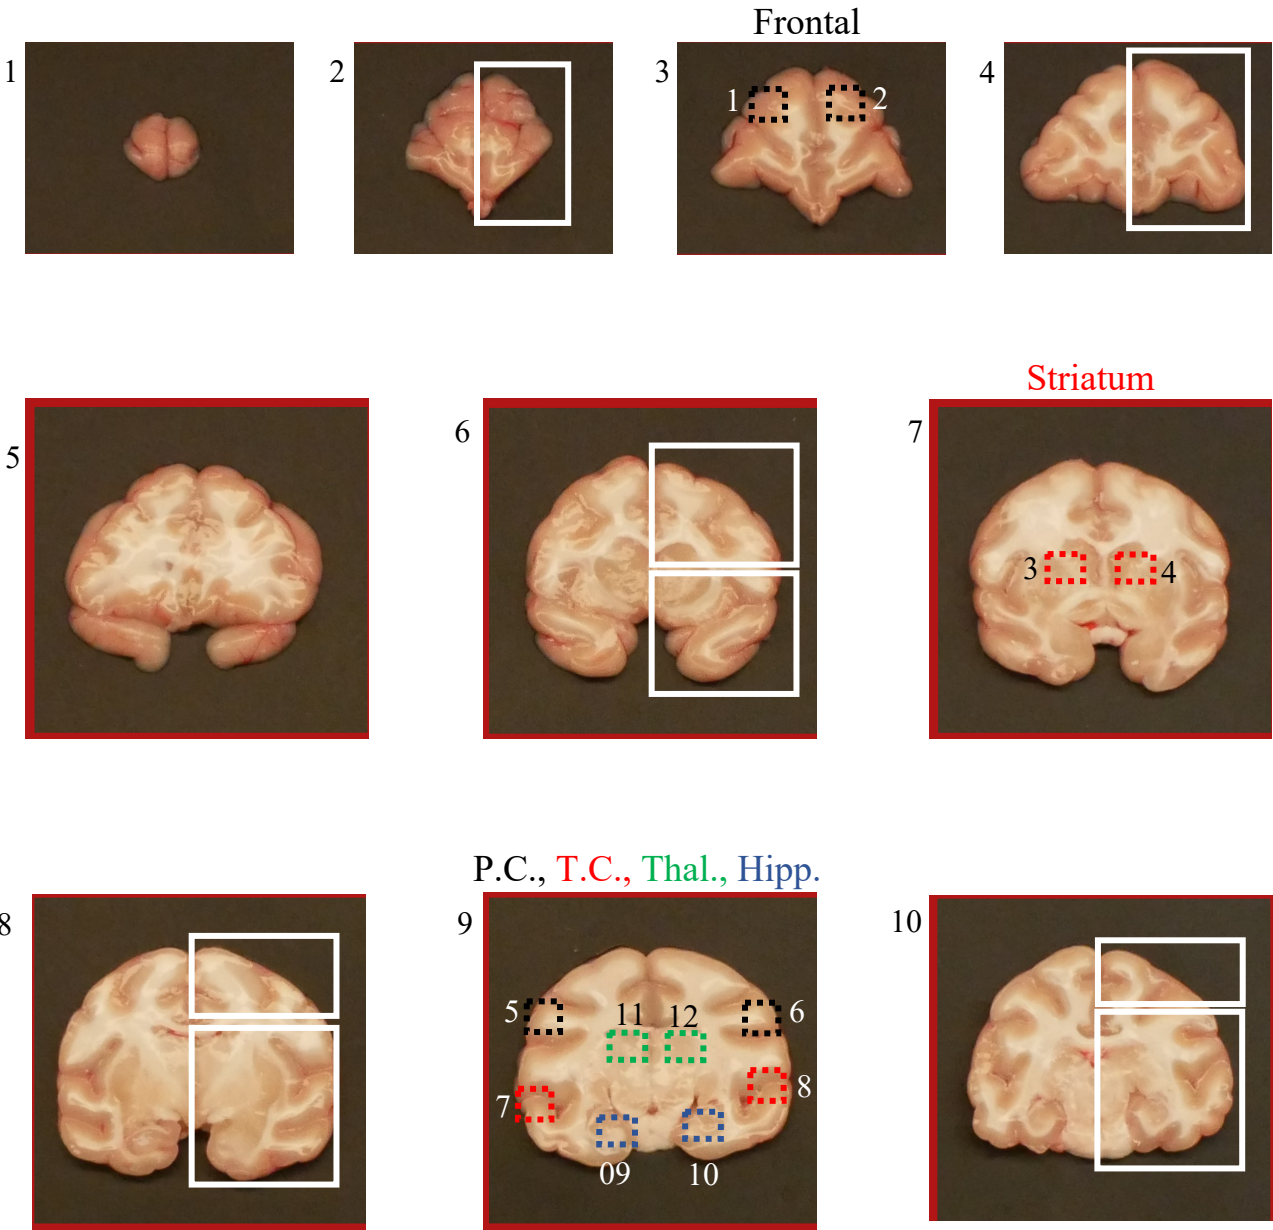

**Appendix 1**

**Pons, Midbrain**

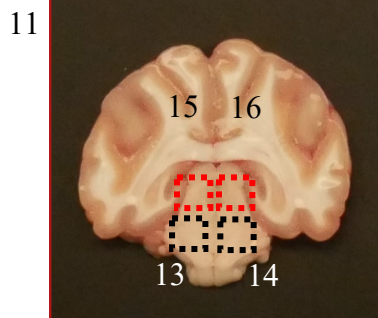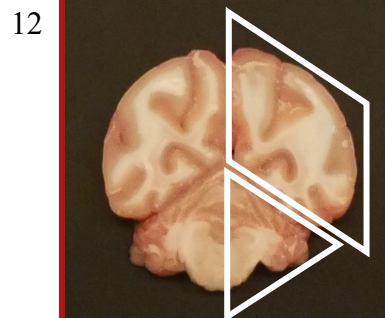

**Medulla**

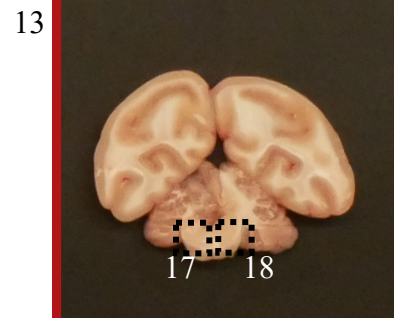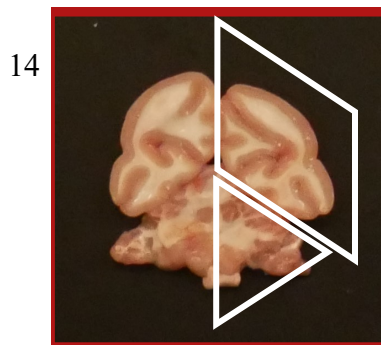

**Occipital, Cerebellum**

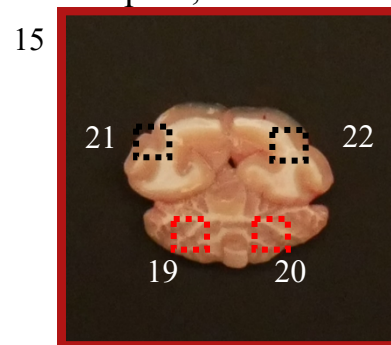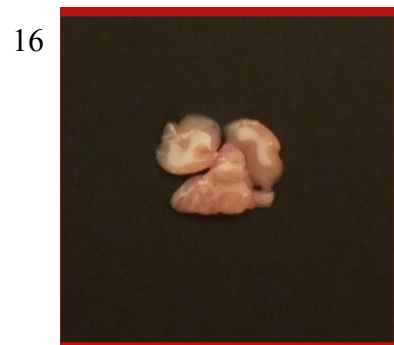

**Appendix 1****ATTACHMENT E****SPINAL CORD COLLECTION PROCEDURE**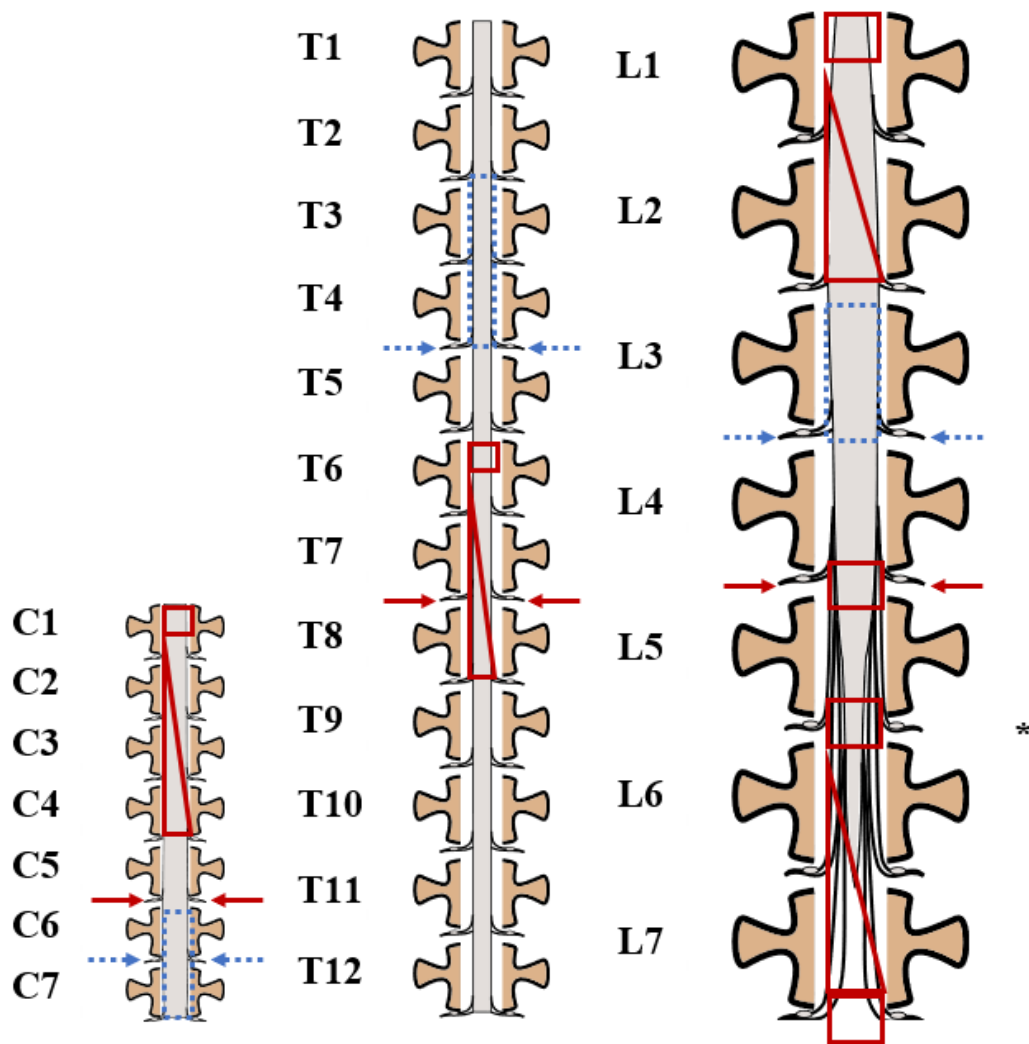

By convention, the last lumbar vertebra is considered to be L7. Red rectangles and arrows represent histology sections for the spinal cord and DRGs respectively, while dashed blue rectangles and arrows represent bioanalysis samples. Levels for the DRGs are given as a guideline and may slightly vary. \* = Injection site.

**Appendix 1**

**SIGNATURE(S) FOR DOCUMENT: 5550014 - Study Plan Amendment 6**

|                                                                                   |                           |
|-----------------------------------------------------------------------------------|---------------------------|
| <b>Study Director</b>                                                             |                           |
| <b>Approval:</b>                                                                  | I approve this document.  |
| Name:                                                                             | <b>Cinquino, Stefania</b> |
| <i>Cinquino, Stefania</i>                                                         |                           |
| 22-Dec-2021 12:38:29 (UTC+00:00)                                                  |                           |
| Electronically Signed in                                                          | Timestamp                 |
| 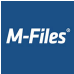 |                           |

**Appendix 1**

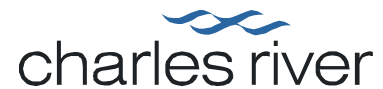

**FINAL STUDY PLAN**

**Test Facility Study No. 5550014**

**Sponsor Reference No. UTSW-Gray-SPG50-004**

**A Single-Dose Study of AAV9/AP4M1 by Intrathecal Injection in  
Immunosuppressed Monkeys**

**Non-GLP**

**SPONSOR:**

University of Texas Southwestern Medical Center  
5323 Harry Hines Blvd  
Dallas, TX 75390-9056  
USA

**TEST FACILITY:**

Charles River Laboratories Montreal ULC  
Senneville Site (CR-SEN)  
22022 Transcanadienne  
Senneville, QC H9X 3R3  
Canada

**Appendix 1****TABLE OF CONTENTS**

|                                                                        |    |
|------------------------------------------------------------------------|----|
| 1. OBJECTIVE.....                                                      | 3  |
| 2. PROPOSED STUDY SCHEDULE .....                                       | 3  |
| 3. SPONSOR .....                                                       | 3  |
| 4. RESPONSIBLE PERSONNEL.....                                          | 4  |
| 5. TEST MATERIALS.....                                                 | 5  |
| 6. DOSE FORMULATION AND ANALYSIS .....                                 | 6  |
| 7. IMMUNOSUPPRESSION FORMULATION.....                                  | 7  |
| 8. TEST SYSTEM.....                                                    | 8  |
| 9. HUSBANDRY .....                                                     | 9  |
| 10. EXPERIMENTAL DESIGN.....                                           | 11 |
| 11. IN-LIFE PROCEDURES, OBSERVATIONS, AND MEASUREMENTS .....           | 13 |
| 12. CLINICAL PATHOLOGY .....                                           | 14 |
| 13. CYTOKINES COLLECTION AND ANALYSIS.....                             | 16 |
| 14. TERMINAL PROCEDURES .....                                          | 17 |
| 15. MICROSCOPIC EVALUATION .....                                       | 20 |
| 16. STATISTICAL ANALYSIS .....                                         | 21 |
| 17. COMPUTERIZED SYSTEMS .....                                         | 21 |
| 18. REGULATORY COMPLIANCE .....                                        | 22 |
| 19. AMENDMENTS AND DEVIATIONS .....                                    | 22 |
| 20. RETENTION AND DISPOSITION OF RECORDS, SAMPLES, AND SPECIMENS ..... | 23 |
| • STUDY CLASSIFICATION .....                                           | 23 |
| 21. REPORTING.....                                                     | 24 |
| 22. JUSTIFICATIONS AND GUIDELINES .....                                | 24 |
| 23. ANIMAL WELFARE .....                                               | 25 |
| 24. REFERENCES .....                                                   | 25 |
| TEST FACILITY APPROVAL.....                                            | 26 |
| SPONSOR APPROVAL .....                                                 | 27 |
| ATTACHMENT A .....                                                     | 28 |
| ATTACHMENT B .....                                                     | 31 |

**Appendix 1****1. OBJECTIVE**

The objectives of this study are to determine the potential toxicity, biodistribution, and gene expression of AAV9/AP4M1, for the treatment of Spastic Paraplegia Type 50 (SPG50) caused by the AP4M1 gene mutation, when given by a single intrathecal injection to monkeys, to evaluate the potential reversibility and/or progression of any findings, and to determine the potential impact of immunosuppressant (IMS) on the toxicity profile of this AAV9 vector.

**2. PROPOSED STUDY SCHEDULE**

Proposed study dates are listed below. Actual dates will be included in the Final Report.

|                               |                                                                                                                             |
|-------------------------------|-----------------------------------------------------------------------------------------------------------------------------|
| Experimental Starting Date:   | 02 Jul 2021<br>(First date of study-specific data collection)                                                               |
| Experimental Completion Date: | 09 May 2022<br>(Last date on which data are collected)                                                                      |
| Animal Transfer:              | 28 Jun 2021                                                                                                                 |
| Initiation of Dosing:         | 13 Jul 2021                                                                                                                 |
| Completion of In-life:        | 13 Sep 2021<br>(Last date of necropsy)                                                                                      |
| Abbreviated Draft Report:     | 09 Nov 2021<br>(8 weeks following completion of in-life)                                                                    |
| Final Report:                 | 09 May 2022<br>(Expected date of Study Director signature of report. Target to be within 6 months of issue of Draft Report) |

**3. SPONSOR**

| Role/Phase                       | Name             | Contact Information                                                                                                                                                                                              |
|----------------------------------|------------------|------------------------------------------------------------------------------------------------------------------------------------------------------------------------------------------------------------------|
| Sponsor Representative           | Steven Gray, PhD | University of Texas Southwestern Medical Center<br>5323 Harry Hines Blvd<br>University of Texas Southwestern Medical Center<br>Dallas, TX 75390<br>Tel: 214.648.0670<br>E-mail: steven.gray@UTsouthwestern.edu   |
| Alternate Sponsor Representative | Roxana Ploski    | University of Texas Southwestern Medical Center<br>5323 Harry Hines Blvd<br>University of Texas Southwestern Medical Center<br>Dallas, TX 75390<br>Tel: 214.648.9828<br>E-mail: roxana.ploski@UTsouthwestern.edu |

**Appendix 1**

| Role/Phase              | Name              | Contact Information                                                                                             |
|-------------------------|-------------------|-----------------------------------------------------------------------------------------------------------------|
| Alternate Study Contact | Terry Pirovolakis | CureSPG50<br>6 Topham Road<br>Toronto, ON M4B 3K2<br>Canada<br>Tel:416.625.1933<br>E-mail: tpirovol@hotmail.com |

**4. RESPONSIBLE PERSONNEL**

| Role/Phase                                                 | Name                                | Contact Information                                                                                                                                                                                            |
|------------------------------------------------------------|-------------------------------------|----------------------------------------------------------------------------------------------------------------------------------------------------------------------------------------------------------------|
| Study Director                                             | Stefania Cinquino, BSc              | Address as cited for Test Facility<br>Tel: 514.630.8200, ext 2151<br>E-mail: stefania.cinquino@crl.com                                                                                                         |
| Test Facility Management                                   | Julie Douville, PhD                 | Address as cited for Test Facility<br>Tel: 514.630.8200, ext 8309<br>E-mail: julie.douville@crl.com                                                                                                            |
| <b>Individual Scientist (IS)</b>                           |                                     |                                                                                                                                                                                                                |
| Nerve Conduction Velocity                                  | Nataliya Sadekova, MSc, DSP         | Address as cited for Test Facility<br>Tel: 514.630.8200, ext 2334<br>E-mail: nataliya.sadekova@crl.com                                                                                                         |
| Cytokines                                                  | Name, Credentials                   | Address as cited for Test Facility<br>Tel:<br>E-mail:                                                                                                                                                          |
| Pathology                                                  | Ryan Schafbuch, BSc, DVM, MS, DACVP | Address as cited for Test Facility<br>Tel: 514.630.8200, ext 8322<br>E-mail: ryan.schafbuch@crl.com                                                                                                            |
| Immuno-toxicology Splenocyte Preparation                   | Name, Credentials                   | Address as cited for Test Facility<br>Tel:<br>E-mail:                                                                                                                                                          |
| <b>Principal Investigator (PI)</b>                         |                                     |                                                                                                                                                                                                                |
| Tissue Biodistribution Analysis (Bioanalysis) <sup>a</sup> | Test Site<br><br>Steven Gray, PhD   | University of Texas Southwestern Medical Center<br>5323 Harry Hines Blvd<br>University of Texas Southwestern Medical Center<br>Dallas, TX 75390<br>Tel: 214-648-0670<br>E-mail: steven.gray@UTsouthwestern.edu |

<sup>a</sup> Sponsor.

Each IS and PI is required to report any deviations or other circumstances that could affect the quality or integrity of the study to the Study Director in a timely manner for authorization/acknowledgement. Each IS and PI, with the exception of those listed below, will provide a report addressing their assigned phase of the study, which will be included as an appendix to the Final Report.

The IS phase report will include the following:

## **Appendix 1**

- A listing of critical computerized systems used in the conduct and/or interpretation of the assigned study phase

The IS for the Immunotoxicology Splenocyte Preparation phase will not provide a formal report.

The PI phase report will include the following:

- The archive site for all records, samples, specimens and reports generated from the phase or segment (alternatively, details regarding the retention of the materials may be provided to the Study Director for inclusion in the Final Report)
- A listing of critical computerized systems used in the conduct and/or interpretation of the assigned study phase

## **5. TEST MATERIALS**

### **5.1. Test and Reference Item Characterization**

A Certificate of Analysis or equivalent documentation will be provided for inclusion in the Final Report (if available).

**Appendix 1****5.2. Test Item Identification****Test Item Identification**

|                                                              | <b>Test Item</b>                                                                               |
|--------------------------------------------------------------|------------------------------------------------------------------------------------------------|
| <b>Identification:</b>                                       | AAV9/AP4M1                                                                                     |
| <b>Alternate Identification:</b>                             | rAAV9.AP4M1                                                                                    |
| <b>Batch/Lot No.:</b>                                        | T-GEMINIS-033                                                                                  |
| <b>Expiration/Retest Date:</b>                               | 22 Dec 2021 (1-year stability time point)<br>Stability concomitant to the study                |
| <b>Physical Description:</b>                                 | Colorless, clear to slightly opalescent, free of visible particles                             |
| <b>Concentration:<br/>(based on ddPCR results)</b>           | 5.43E13 vg/mL                                                                                  |
| <b>Storage Conditions<br/>(temperature set to maintain):</b> | -80°C<br>(upon thawing of a vial, it may be stored at 4°C and used on a subsequent dosing day) |
| <b>Provided by:</b>                                          | Sponsor                                                                                        |

**5.3. Reference Item/Vehicle Identification****Reference Item/Vehicle Identification**

|                                                              | <b>Reference Item</b>                                 |
|--------------------------------------------------------------|-------------------------------------------------------|
| <b>Identification:</b>                                       | PBS containing 5% D-sorbitol and 0.001% pluronic F-68 |
| <b>Storage Conditions<br/>(temperature set to maintain):</b> | -80°C                                                 |
| <b>Provided by:</b>                                          | Sponsor                                               |

**5.4. Test and Reference Item Inventory and Disposition**

Records of the receipt, distribution, storage, and disposition of test materials will be maintained. All unused Sponsor-supplied bulk test materials, with the exception of reserve samples, will be returned to the Sponsor following issuance of the Draft Report unless otherwise requested (documentation will be retained in the study record). An earlier shipment of these materials may also be requested and authorized by the Study Director and Sponsor. See Shipment of Samples and Study Records ([Attachment C](#)) for shipping details.

**5.5. Safety**

The safety precautions for the test item and dose formulations will be documented in a Test Material Safety Data Sheet (TMSDS) based on the SDS or similar document.

**6. DOSE FORMULATION AND ANALYSIS****6.1. Preparation of Formulations**

Dose formulations will be divided into aliquots, where required, and dispensed on each dosing occasion.

**Appendix 1****Preparation Details**

| <b>Dose Formulation</b> | <b>Frequency of Preparation</b> | <b>Storage Conditions<br/>(temperature set to maintain)</b> |
|-------------------------|---------------------------------|-------------------------------------------------------------|
| Reference Item          | Used as received                | 4°C                                                         |
| Test Item               | At least once                   | 4°C                                                         |

Any residual volumes from each dosing occasion will be shipped back to the Sponsor; see [Attachment C](#). Residual volumes will be archived by the Sponsor and will be kept for potential future analysis. Analysis, if conducted, will be added by amendment.

**6.2. Preparation Details**

Dosing formulations will be prepared under a laminar flow hood using clean procedures.

Dosing formulations will be prepared based on Sponsor's instructions at appropriate concentrations to meet dose level requirements.

**7. IMMUNOSUPPRESSION FORMULATION****7.1. Immunosuppression Material****Immunosuppression (IMS) Identification**

|                                                              | <b>IMS 1</b>                 | <b>IMS 2</b>                 | <b>IMS 3</b>                  |
|--------------------------------------------------------------|------------------------------|------------------------------|-------------------------------|
| <b>Identification:</b>                                       | Methylprednisolone succinate | Methylprednisolone acetate   | Rapamycin                     |
| <b>Alternate Identification:</b>                             | Solu-Medrol                  | Depo-Medrol                  | -                             |
| <b>Physical Description:</b>                                 | Liquid                       | Liquid                       | Powder                        |
| <b>Concentration:</b>                                        | 125 mg/mL                    | 20 mg/mL                     | N/A                           |
| <b>Storage Conditions<br/>(temperature set to maintain):</b> | 21°C<br>Protected from light | 21°C<br>Protected from light | -20°C<br>Protected from light |
| <b>Provided by:</b>                                          | Test Facility                | Test Facility                | Test Facility                 |
| <b>Supplier:</b>                                             | Pfizer                       | Pfizer                       | Toronto Research Chemicals    |

N/A = Not applicable

**7.2. Immunosuppression Vehicle****Immunosuppressants Vehicle Identification**

|                                                              | <b>Vehicle for<br/>Solu-Medrol</b>  | <b>Vehicle Components for Rapamycin</b> |                              |                     |
|--------------------------------------------------------------|-------------------------------------|-----------------------------------------|------------------------------|---------------------|
| <b>Identification:</b>                                       | 0.9% sodium chloride injection, USP | N <sub>2</sub> N-Dimethylacetamide      | Tween-80                     | Polyethylene Glycol |
| <b>Storage Conditions<br/>(temperature set to maintain):</b> | 21°C                                | 21°C                                    | 21°C<br>Protected from light | 21°C                |
| <b>Provided by:</b>                                          | Test Facility                       | Test Facility                           | Test Facility                | Test Facility       |

**Appendix 1****7.3. Immunosuppressant Preparation Details**

IMS dose formulations will be divided into aliquots, where required, and dispensed on each dosing occasion.

**Preparation Details**

| <b>Dose Formulation</b>      | <b>Frequency of Preparation</b> | <b>Storage Conditions<br/>(temperature set to maintain)</b> |
|------------------------------|---------------------------------|-------------------------------------------------------------|
| Methylprednisolone succinate | At least weekly                 | 21°C<br>protected from light                                |
| Methylprednisolone acetate   | At least weekly                 | 21°C<br>protected from light                                |
| Rapamycin                    | At least weekly                 | 4°C<br>Protected from light (in amber glass vials)          |

IMS dosing formulations will be prepared based on Sponsor's instructions at appropriate concentrations to meet dose level requirements.

**7.4. Sample Collection and Analysis**

Samples for test or reference item dose formulation and/or IMS dose formulation analysis will not be collected by the Test Facility.

**8. TEST SYSTEM**

Species: Monkey  
Strain: Cynomolgus  
Condition: Purpose-bred, naïve  
Source: CR-SEN Colony, original source will be documented in the Final Report  
Continent of Origin: Vietnam  
Number of Males to be Assigned: 2  
Number of Females to be Assigned: 4 (plus 1 alternate)  
Target Age at the Initiation of Dosing: 2 to 4 years of age  
Target Weight at the Initiation of Dosing: 1.5 to 6 kg

The actual age and weight of the animals at the initiation of dosing will be listed in the Final Report.

**Appendix 1****8.1. Animal Screening**

Method: All animals used on study will have documentation to confirm one negative tuberculosis (TB) test. Additional TB testing may be performed as required.

**8.2. Animal Identification**

Method: Subcutaneously implanted electronic identification chip.

**8.3. Environmental Acclimation**

Method: At least 2 weeks will be allowed between animal transfer and the start of dosing in order to accustom the animals to the laboratory environment.

**8.4. Selection, Assignment, Replacement, and Disposition of Animals**

Selection: Pre-established pairs will be assigned to groups using a computerized-based randomization procedure. Males and females will be randomized separately.

Replacement: Before the initiation of dosing, any assigned animals considered unsuitable for use in the study will be replaced by alternate animals. After initiation of dosing, study animals may be replaced during the replacement period with alternate animals in the event of accidental injury, non-test item-related health issues, or similar circumstances. The alternate animals may be used as replacements on the study within 2 days. General in-life assessments will include alternate animals until released from study.

Disposition: The disposition of all animals will be documented in the study records.

**9. HUSBANDRY****9.1. Housing**

Housing: Group-housed (up to 3 animals of the same sex and same dosing group together).

Caging: Stainless steel cages with stainless steel mesh floor

Cage Identification: Color-coded cage card indicating study, group, animal/tattoo number(s), and sex.

Housing set-up is as described in the *Guide for the Care and Use of Laboratory Animals* ([National Research Council, 2011](#)) Animals will be separated during designated procedures/activities or will be separated as required for monitoring and/or health purposes, as deemed appropriate by Study Director and/or Clinical Veterinarian.

**Appendix 1****9.2. Animal Enrichment**

Psychological/  
Environmental  
Enrichment: Animals will be socially housed and will be provided with items such as perches, floor enrichment devices, foraging devices and/or suspended devices, except during study procedures/activities. Additional enrichment, such as music, natural sounds or color videos films will also be provided. Each animal will be offered food supplements (such as certified treats, fruit/vegetables and/or Foraging Crumbles™).

**9.3. Environmental Conditions**

The targeted conditions for animal room environment will be as follows:

Temperature: 23 ±3°C  
Humidity: 30% to 70%  
Light Cycle: 12 hours light and 12 hours dark (except during designated procedures)

**9.4. Food**

Diet: Lab Diet Certified Primate Diet 5048  
Type: Pellets  
Frequency/Ration: Twice daily, except during designated procedures. The chow will be provided in amounts appropriate for the size and age of the animals.  
Analysis: Results of analysis for nutritional components and environmental contaminants are provided by the supplier and are kept on file at the Test Facility. It is considered that there are no known contaminants in the feed that would interfere with the objectives of the study.

**9.5. Water**

Type: Municipal tap water, treated by reverse osmosis and ultraviolet irradiation.  
Frequency/Ration: Freely available to each animal via an automatic watering system (except during designated procedures).  
Analysis: Periodic analysis of the water is performed, and results of these analyses are kept on file at the Test Facility. It is considered that there are no known contaminants in the water that would interfere with the outcome of the study.

**9.6. Veterinary Care**

Veterinary care will be available throughout the course of the study and animals will be examined by the veterinary staff as warranted by clinical signs or other changes. In the event that

**Appendix 1**

animals show signs of illness or distress, the responsible veterinarian may make initial recommendations about treatment of the animal(s) and/or alteration of study procedures, which must be approved by the Study Director or Scientific designate. Treatment of the animal(s) for minor injuries or ailments may be approved without prior consultation with the Sponsor representative when such treatment does not impact fulfillment of the study objectives. If the condition of the animal(s) warrants significant therapeutic intervention or alterations in study procedures, the Sponsor representative will be contacted, when possible, to discuss appropriate action. If the condition of the animal(s) is such that emergency measures must be taken, the Study Director (or Scientific designate) and/or veterinarian will attempt to consult with the Sponsor representative prior to responding to the medical crisis, but the Study Director (or Scientific designate) and/or veterinarian has authority to act immediately at his/her discretion to alleviate suffering. The Sponsor representative will be fully informed of any such events.

**10. EXPERIMENTAL DESIGN****Experimental Design**

| Group No. | Test Material  | Dose Level (vg)       | Dose Volume (mL) | Dose Concentration (vg/mL) | No. of Animals |         |
|-----------|----------------|-----------------------|------------------|----------------------------|----------------|---------|
|           |                |                       |                  |                            | Main Study     |         |
|           |                |                       |                  |                            | Males          | Females |
| 1         | Reference Item | 0                     | 1                | 0                          | 1              | 1       |
| 2         | AAV9/AP4M1     | $8.4 \times 10^{13}$  | 1.55             | $5.43 \times 10^{13}$      | -              | 2       |
| 3         | AAV9/AP4M1     | $1.68 \times 10^{14}$ | 3.10             | $5.43 \times 10^{13}$      | 1              | 1       |

**10.1. Administration of Test and Reference Item**

**Dose Route:** Percutaneous intrathecal injection (slow bolus, target rate of 1 mL/min) at the lumbar level (target L5-L6 space, L4-L5 may also be used if necessary)

**Frequency:** Once

**Duration:** 1 day

**Method:** The first day of dosing will be designated as Day 1.

Animals will be food deprived at least 6 hours prior to dosing. Animals will be anesthetized with a ketamine/dexmedetomidine/glycopyrrolate cocktail. Tracheal intubation will be performed, oxygen will be provided and anesthesia will then be maintained using isoflurane, if required.

Dose formulations will be allowed to warm up to room temperature for at least 30 minutes prior to dosing.

Percutaneous intrathecal injection will be performed using atraumatic spinal needle (e.g. B Braun, 25 Gauge, 1 inch); actual needle will be recorded in the raw data. Animals will remain in a Trendelenberg

**Appendix 1**

position for at least 15 minutes after the dosing is completed prior to the administration of the reversal agent (atipamezole), when required.

**10.2. Administration of Anti-Inflammatory**

On days of dose administration and/or CSF collections, animals will receive an anti-inflammatory (Meloxicam) subcutaneously prior to dosing/CSF collection and then orally daily, starting the morning after dosing/CSF collection, for a total of 2 doses.

**10.3. Administration of Immunosuppressant Material****Immunosuppressant (IMS) Information**

| Group No. | Test Material                | Study Day | Method                 | Dose Level (mg/kg/dose) | Dose Volume (mL/kg) | Dose Concentration (mg/mL) | Frequency                          |
|-----------|------------------------------|-----------|------------------------|-------------------------|---------------------|----------------------------|------------------------------------|
| 1 to 3    | Methylprednisolone succinate | 1         | IV infusion for 30 min | 10                      | 0.5                 | 20                         | Once on Day 1 only                 |
|           | Methylprednisolone acetate   | 1 to 62   | IM                     | 1                       | 0.05                | 20                         | SID; first dose morning of surgery |
|           | Rapamycin                    | -14 to 62 | IM                     | 0.01                    | 0.067               | 0.15                       | BID, 12 hr $\pm$ 3 hrs apart       |

min = minute; IV = intravenous; IM = intramuscular; SID = once daily; BID = twice daily

**10.3.1. Methylprednisolone Succinate**

**Dose Route:** Intravenous infusion into a lateral tail vein (or alternate peripheral vein if necessary) using an infusion pump connected to a temporary indwelling catheter (Abbocath®)

Following the end of infusion, the Abbocath® will be flushed with 0.5 mL of 0.9% sodium chloride for injection.

**Frequency:** Once on Day 1 for 30 minutes, prior to dosing (within 4 hours of dosing)

**Infusion Rate:** 1 mL/kg/h

**Method:** Dose formulations will be allowed to warm up at ambient temperature for at least 30 minutes prior to dosing, as appropriate. The animals will be temporarily restrained for dose administration and will not be sedated.

**Appendix 1****10.3.2. Methylprednisolone Acetate**

Dose Route: Intramuscular injection into the lateral compartment of the thigh

Duration: From Days 1 to Day 62

Frequency: Once daily; first dose the morning of dosing (within 4 hours of dosing)

Method: Dose formulations will be allowed to warm up at ambient temperature for at least 30 minutes prior to dosing, as appropriate. The animals will be temporarily restrained for dose administration and will not be sedated.

**10.3.3. Rapamycin**

Dose Route: Intramuscular injection into the lateral compartment of the thigh

Duration: From Days -14 to Day 62

Frequency: Twice daily; 12 hr  $\pm$  3 hrs apart

Method: Dose formulations will be allowed to warm up at ambient temperature for at least 30 minutes prior to dosing, as appropriate. The animals will be temporarily restrained for dose administration and will not be sedated.

**11. IN-LIFE PROCEDURES, OBSERVATIONS, AND MEASUREMENTS****General In-life Assessments – Main Study Animals**

| Parameter                                             | Frequency                                                                                                            | Comments                                                                                                                                             |
|-------------------------------------------------------|----------------------------------------------------------------------------------------------------------------------|------------------------------------------------------------------------------------------------------------------------------------------------------|
| <b>Mortality/<br/>Moribundity Checks<sup>a</sup></b>  | Twice daily (morning and afternoon) starting upon arrival through termination.                                       | Animals will be observed within their cage unless removal is necessary for identification or confirmation of possible findings.                      |
| <b>Detailed Clinical<br/>Observations<sup>a</sup></b> | Weekly starting Day -1, and at least every 2 weeks during the prestudy period.                                       | Animals are removed from the cage                                                                                                                    |
| <b>Individual Body<br/>Weights<sup>a</sup></b>        | Weekly starting Day -1, and at least every 2 weeks during the prestudy period.                                       | Fasted weight on the day of necropsy. No terminal body weights collected from animals found dead or preterminally euthanized.                        |
| <b>Food Evaluation<sup>a</sup></b>                    | Once daily; from at least Week -1 and throughout the study                                                           | Qualitative                                                                                                                                          |
| <b>Neurological<br/>Examinations<sup>a</sup></b>      | Once pretreatment, on Day 1 at 4 to 6 hours postdose, on Days 2, 7 and 28, and at the end of the observation period. | Assessment for general attitude and motor function, postural reactions, and cranial and spinal nerve functions; performed on unanesthetized animals. |

<sup>a</sup> Minimum required frequency for this parameter indicated

**Appendix 1****11.1. Nerve Conductivity Velocity (NCV)**

Frequency: Once prestudy and on Days 28 and 56.

Anesthesia: An intramuscular injection of ketamine, glycopyrrolate and dexmedetomidine will be administered following an appropriate fasting period. Following the completion of the assessment, a reversal agent, atipamezole, will be administered if required.

Evaluation: Peroneal motor: NCV and Amplitude  
Sural sensory: NCV and Amplitude  
Cauda equina: Onset latency

**12. CLINICAL PATHOLOGY****12.1. Sample Collection****Clinical Pathology Sample Collection – Main Study Animals**

| Group Nos.                                | Occasion/<br>Time Point | Hematology   | Coagulation    | Clinical<br>Chemistry | Urinalysis                                    | Additional<br>Serum |
|-------------------------------------------|-------------------------|--------------|----------------|-----------------------|-----------------------------------------------|---------------------|
| All animals                               | Pretreatment            | X            | X              | X                     | X                                             | X                   |
| 1 to 3                                    | Day 2                   | X            | X              | X                     | X                                             | X                   |
| 1 to 3                                    | Week 1                  | X            | X              | X                     | X                                             | X                   |
| 1 to 3                                    | Week 2                  | -            | -              | X                     | -                                             | X                   |
| 1 to 3                                    | Week 3                  | -            | -              | X                     | -                                             | X                   |
| 1 to 3                                    | Week 4                  | X            | X              | X                     | X                                             | X                   |
| 1 to 3                                    | End of<br>recovery      | X            | X              | X                     | X                                             | X                   |
| Unscheduled euthanasia<br>(when possible) |                         | X            | X              | X                     | -                                             | X                   |
| <b>Overnight Fasting:</b>                 |                         | -            | -              | Yes                   | Yes                                           | -                   |
| <b>Method/Comments:</b>                   |                         | Venipuncture | Venipuncture   | Venipuncture          | morning<br>collection while<br>water deprived | Venipuncture        |
| <b>Target Volume (mL)<sup>a</sup>:</b>    |                         | 0.7          | 1.2            | 0.7                   | As available                                  | 1.2                 |
| <b>Anticoagulant:</b>                     |                         | EDTA         | Sodium citrate | None, in SST          | -                                             | None, in SST        |
| <b>Special Requirements:</b>              |                         | -            | -              | -                     | -                                             | -                   |
| <b>Processing:</b>                        |                         | None         | Plasma         | Serum                 | -                                             | Serum               |

X = Sample to be collected; - = Not applicable; SST = Serum separator tube.

<sup>a</sup> Additional samples may be obtained (e.g., due to clotting of non-serum samples) if permissible sampling frequency and volume are not exceeded.

**Appendix 1****12.2. Hematology****Hematology Parameters**

|                                           |                                  |
|-------------------------------------------|----------------------------------|
| Red blood cell count                      | Platelet count                   |
| Hemoglobin concentration                  | White blood cell count           |
| Hematocrit                                | Neutrophil count (absolute)      |
| Mean corpuscular volume                   | Lymphocyte count (absolute)      |
| Red blood cell distribution width         | Monocyte count (absolute)        |
| Mean corpuscular hemoglobin concentration | Eosinophil count (absolute)      |
| Mean corpuscular hemoglobin               | Basophil count (absolute)        |
| Reticulocyte count (absolute)             | Large unstained cells (absolute) |

A blood smear will be prepared from each hematology sample and may be examined for confirmation of hematology results.

**12.3. Coagulation****Coagulation Parameters**

|                                       |                  |
|---------------------------------------|------------------|
| Activated partial thromboplastin time | Prothrombin time |
| Fibrinogen                            | Sample quality   |

**12.4. Clinical Chemistry****Clinical Chemistry Parameters**

|                              |                        |
|------------------------------|------------------------|
| Alanine aminotransferase     | Total protein          |
| Aspartate aminotransferase   | Albumin                |
| Alkaline phosphatase         | Globulin               |
| Gamma-glutamyltransferase    | Albumin/globulin ratio |
| Creatine kinase              | Glucose                |
| Total bilirubin <sup>a</sup> | Cholesterol            |
| Urea nitrogen                | Triglycerides          |
| Creatinine                   | Sodium                 |
| Calcium                      | Potassium              |
| Phosphorus                   | Chloride               |
|                              | Sample quality         |

<sup>a</sup> When total bilirubin is > 1.0 mg/dL, direct bilirubin will also be measured and indirect bilirubin will be calculated.

**12.5. Urinalysis****Urinalysis Parameters**

|                    |                      |
|--------------------|----------------------|
| Color              | Protein <sup>a</sup> |
| Appearance/Clarity | Glucose <sup>a</sup> |
| Specific gravity   | Bilirubin            |
| Volume             | Ketones              |
| pH                 | Blood                |

<sup>a</sup> Semi-quantitative measurement

**Appendix 1****12.6. Additional Serum Sample Processing**

The samples will be centrifuged and the resultant serum will be separated, transferred to 2 uniquely labeled polypropylene tubes, and frozen immediately over dry ice or in a freezer set to maintain -80°C within 2 hours of collection.

Samples will be shipped to the Sponsor for archival. Analysis, if conducted, will be added by amendment.

**12.7. Bone Marrow Smear Evaluation**

Bone marrow smears will be collected and prepared as described in [Attachment A](#) and may be examined for confirmation of results.

**13. CYTOKINES COLLECTION AND ANALYSIS****Cytokines Sample Collection**

| Group Nos.                             | Time Postdose on Day 1 |        |      |       |
|----------------------------------------|------------------------|--------|------|-------|
|                                        | Predose                | 30 min | 4 hr | 24 hr |
| 1 to 3                                 | X                      | X      | X    | X     |
| Unscheduled euthanasia (when possible) | X                      |        |      |       |
| <b>Method/Comments:</b>                | Venipuncture           |        |      |       |
| <b>Target Volume<sup>a</sup>:</b>      | 0.5                    |        |      |       |
| <b>Anticoagulant:</b>                  | K <sub>2</sub> EDTA    |        |      |       |
| <b>Special Requirements:</b>           | -                      |        |      |       |
| <b>Processing:</b>                     | Plasma                 |        |      |       |

X = Sample to be collected; min = Minute; hr = Hour.

<sup>a</sup> Additional blood samples may be obtained (e.g., due to sample quality) if permissible sampling frequency and blood volume are not exceeded.

**13.1. Cytokine Sample Processing**

The samples will be centrifuged and the resultant plasma will be separated, transferred to 2 uniquely labeled polypropylene tubes (target 1 x 75 µL + leftover), and frozen immediately over dry ice or in a freezer set to maintain -80°C within 2 hours of collection.

**13.2. Cytokine Sample Analysis**

Analysis for cytokines (IL-6, IL-8, IL-10, IP-10, KC-like, MCP-1, and TNF-α) will be conducted using a multiplex bead-based method (Luminex). The procedures to be followed during the course of this study along with the assay acceptance criteria will be detailed in CR-SEN analytical procedure AP.BMK.mkpCyt.xx, in which “xx” denotes the version number. The cytokine method was validated under CR-SEN Study No. 3600083, however some cytokines have method limitations when used together in a multiplex panel. These limitations will be taken into consideration and discussed in the interpretative phase report.

**Appendix 1****13.3. Bioanalytical Sample Analysis****Bioanalytical Sample Collection**

| Group Nos.                        | Prestudy     |
|-----------------------------------|--------------|
| 1 to 3                            | X            |
| <b>Method/Comments:</b>           | Venipuncture |
| <b>Target Volume<sup>a</sup>:</b> | 1            |
| <b>Anticoagulant:</b>             | None, in SST |
| <b>Special Requirements:</b>      | None         |
| <b>Processing:</b>                | Serum        |

X = Sample to be collected.

<sup>a</sup> Additional blood samples may be obtained (e.g., due to sample quality) if permissible sampling frequency and blood volume are not exceeded.

The samples will be centrifuged and the resultant serum will be separated, transferred to 2 uniquely labeled polypropylene tubes, and frozen immediately over dry ice or in a freezer set to maintain -80°C.

Samples will be kept for possible future analysis of anti-AAV9 antibodies using a cell-based neutralizing antibody assay.

**14. TERMINAL PROCEDURES**

Terminal procedures are summarized in the following tables:

**Replaced, Found Dead, and Unscheduled Euthanasia Animals**

| Animals                               | Necropsy Procedures |                          |               | Histology Processing   | Microscopic Evaluation |
|---------------------------------------|---------------------|--------------------------|---------------|------------------------|------------------------|
|                                       | Necropsy            | Tissue Collection        | Organ Weights |                        |                        |
| Animals replaced prestudy             | X                   | Standard Diagnostic List | -             | -                      | -                      |
| Animals replaced after dosing start   | X                   | Full List <sup>a</sup>   | -             | -                      | -                      |
| Unscheduled deaths after dosing start | X                   | Full List <sup>a</sup>   | -             | Full List <sup>a</sup> | Full List <sup>a</sup> |

**Main Study Animals**

| Group No. | Scheduled Euthanasia Day | Necropsy Procedures |                        |                        | Histology Processing   | Microscopic Evaluation      |
|-----------|--------------------------|---------------------|------------------------|------------------------|------------------------|-----------------------------|
|           |                          | Necropsy            | Tissue Collection      | Organ Weights          |                        |                             |
| 1         | 63                       | X                   | Full List <sup>a</sup> | Full List <sup>a</sup> | Full List <sup>a</sup> | Select Tissues <sup>b</sup> |
| 2         |                          |                     |                        |                        |                        |                             |
| 3         |                          |                     |                        |                        |                        |                             |

X = Procedure to be conducted; - = Not applicable.

<sup>a</sup> See Tissue Weighing, Collection, Processing and Evaluation table in [Attachment A](#) for list of tissues applicable to each procedure.

<sup>b</sup> Brain, spinal cord (cervical, thoracic, lumbar), dorsal root ganglia (cervical, thoracic, lumbar), liver, spleen, lung, kidney, and heart.

**Appendix 1****14.1. Method of Euthanasia**

Exsanguination by incision of the axillary or femoral arteries following anesthesia by intravenous injection of sodium pentobarbital, unless deemed inappropriate by the Study Director and/or the clinical veterinarian. A sedative, ketamine HCl for injection, USP will be administered by intramuscular injection before animals are transported from the animal room to the necropsy area.

**14.2. Unscheduled Euthanasia**

Main Study animals to be euthanized for humane reasons before the scheduled time will undergo sample collection for evaluation of clinical pathology parameters, cytokine analysis, and bioanalysis, if possible as specified in Section 12.1, 13, and 14.7.

Tissues from animal replaced after the start of dosing will be retained (as per Tissue Collection and Preservation section) and any data generated will not be included in the report unless deemed appropriate by the Study Director.

**14.3. Scheduled Euthanasia**

Main Study animals surviving until scheduled euthanasia will be food deprived overnight. When possible, the animals will be euthanized rotating across dose groups such that similar numbers of animals from each group, including controls, will be necropsied throughout the day.

**14.4. Necropsy**

Animals as detailed in the [Terminal Procedures](#) table will be subjected to a complete necropsy examination, which will include evaluation of the carcass and musculoskeletal system; all external surfaces and orifices; cranial cavity and external surfaces of the brain; and thoracic, abdominal, and pelvic cavities with their associated organs and tissues. Necropsy examinations will be performed by qualified personnel with appropriate training and experience in animal anatomy and gross pathology. A veterinary pathologist, or other suitably qualified person, will be available for consultation.

Images may be generated for illustration of or consultation on gross observations. These images will not be used for data generation or interpretation, and will not be archived or included in the final report.

**14.5. Organ Weights**

The organs detailed in the [Terminal Procedures](#) and [Tissue Weighing, Collection, Processing and Evaluation \(Attachment A\)](#) tables will be weighed at necropsy. Paired organs will be weighed together. In the event of gross abnormalities, in addition to the combined weight, the weight of each organ of a pair may be taken and entered as a tissue comment. Organ weight as a percent of body weight (using the terminal body weight) and organ weight as a percent of brain weight will be calculated.

**Appendix 1****14.6. Tissue Collection and Preservation**

Representative samples of tissues will be collected and preserved in 10% neutral buffered formalin, except for tissues requiring alternate fixatives as defined by standard operating procedures, as detailed in the [Terminal Procedures](#) and [Tissue Weighing, Collection, Processing and Evaluation \(Attachment A\)](#) tables. Additional tissue samples may be collected to elucidate abnormal findings.

**14.7. Tissue Collection for Bioanalysis**

3 samples of 4x4x4 mm each, except for DRG where 1 sample/segment will be collected) of the spinal cord (cervical, lumbar, and thoracic), dorsal root ganglia (cervical, lumbar, and thoracic), liver, spleen, kidney, lung, skeletal muscles (gastrocnemius and biceps femoris), sciatic nerve, tibial nerve, trigeminal ganglia, testis/ovaries, thymus, and heart will be collected, weighed, placed in polypropylene tubes on dry ice, and transferred to a freezer set to maintain -80°C until shipment. Clean removal techniques will be used.

At scheduled euthanasia, the brain (cerebellum, hippocampus, cortex [frontal, parietal, occipital, and temporal lobes], striatum, thalamus, midbrain, pons, medulla) of each animal in all groups will be sectioned at 4-mm coronal slice thickness (see [Attachment B](#)) using clean removal technique. The second slice and every other slice thereafter will be fixed in 10% neutral buffered formalin for histopathological evaluation. The third slice and every other slice thereafter will be used to collect tissue punches (8 x 8 x 4 mm, when possible) for bioanalysis (BA) according to the table in Section 14.8. The sampling of brain slices for histopathology and BA analysis is summarized in Attachment D. Each punch will be sectioned in half (sagittal section relative to brain), as to provide duplicate samples of each structure. All punches for BA will be weighed (before freezing). Tissue punches for BA will be placed in PCR clean vials, flash frozen in liquid nitrogen and stored at -80°C until analysis. For animals found dead or euthanized early, the whole brain will be fixed in formalin for histopathology.

When possible, the order of tissue collection will be as follows: spleen, liver, kidney, brain then remaining tissues.

Tissues for histopathology will be collected prior to sample collection for any other parameters.

The samples will be shipped to the University of Texas Southwestern Medical Center, see [Attachment B](#). The bioanalytical laboratory will be notified before shipment of the samples. Samples will be stored at the bioanalytical laboratory in a freezer set to maintain -60°C or below until analysis.

Samples will be analyzed for vector genome biodistribution and transgene expression by qPCR. All analytical work will be conducted by the Sponsor, using an analytical method developed and qualified by that laboratory.

**Appendix 1****14.8. Splenocyte Sample Collection Analysis**

The spleen will be collected using cell culture clean procedures from all animals at scheduled necropsy. Dissected spleens, a sample of approximately 1x1cm, weighed will be placed into prechilled tubes containing RPMI media and stored at 2°C to 8°C or on wet ice before processing to splenocytes. Splenocytes will then be cryopreserved/frozen until analysis.

Samples will be processed at ambient temperature according to standard CR-SEN SOP and analytical procedure AP.5550015.SPL.xx (where xx denote the version of the procedure), except that all washes will be performed with RPMI-1640 Media and samples will be frozen as follows:

Prepare a sufficient number of 2 mL cryovials to hold the cells at  $2 \times 10^7$  cells/mL. Open the vials and add 100  $\mu$ L of Hybridoma-Grade DMSO (Freezing media is 90% heat-inactivated FBS and 10 % DMSO). Add sufficient heat-inactivated FBS to the cell pellet to put the cells at  $2 \times 10^7$ /mL when added to the DMSO. Gently resuspend the pellet via pipetting and then add to the tubes containing DMSO. The act of addition and higher density of FBS will mix the FBS and DMSO yielding an evenly distributed freezing media. 1-2 gentle inversions can be used to assure even mixing. If adequate splenocytes are available, 3 aliquots of cells at  $2 \times 10^7$ /mL will be prepared for each animal. Splenocytes will be stored in the vapor phase of liquid nitrogen until shipped to the Sponsor on dry ice. See Attachment B for shipping details.

The splenocytes will be analyzed for T-cell responses against AAV9 and AP4M1. All analytical work will be conducted by the Sponsor, using an analytical method developed and qualified by that laboratory.

**15. MICROSCOPIC EVALUATION****15.1. Histology**

Tissues in the [Terminal Procedures](#) and [Tissue Weighing, Collection, Processing and Evaluation \(Attachment A\)](#) tables from animals identified in the [Terminal Procedures](#) table will be embedded in paraffin, sectioned, mounted on glass slides, and stained with hematoxylin and eosin.

**15.2. Microscopic Evaluation**

Tissues as detailed in the [Terminal Procedures](#) and [Tissue Weighing, Collection, Processing and Evaluation \(Attachment A\)](#) tables will be evaluated histopathologically by a veterinary pathologist with training and experience in laboratory animal pathology.

Special stains may be used at the discretion of the pathologist to further characterize lesions and changes identified during routine evaluation of individual animals. Any special stains will be documented in the individual animal data. Any additional stains or evaluations, if deemed necessary by the pathologist, may be added by study plan amendment following discussion with the Study Director and in consultation the Sponsor. Efforts will be made to evaluate all study plan-required tissues microscopically; however, it is not always feasible for every study plan-required tissue to be present on every slide. Study plan-required tissues that are not examined

**Appendix 1**

will be documented in the histopathology data and the impact of these missing tissues on the study will be documented in the pathology report.

Images may be generated for illustration of or consultation on histological observations. These images will not be used for data generation or interpretation, and will not be archived or included in the Final Report.

**15.3. Pathology Peer Review**

A pathology peer review, will be conducted by:

|              |                                         |
|--------------|-----------------------------------------|
| Peer Review  | Elaine Debien, DVM, DES, MSc, DACVP     |
| Pathologist: | Charles River Laboratories Montreal ULC |
|              | Senneville Site (CR-SEN)                |
|              | Address as cited for Test Facility      |
|              | Tel: 819.346.8200, ext 7016             |
|              | E-mail: elaine.debien@crl.com           |

Histopathology slides will be shipped to the pathologist, see [Attachment B](#) for shipping details.

The peer review statement or equivalent documentation will be included as an appendix to the Final Report.

**16. STATISTICAL ANALYSIS**

Data will be presented as individual values by animal.

**16.1. Constructed Variables**

|                                        |                                                                                                                             |
|----------------------------------------|-----------------------------------------------------------------------------------------------------------------------------|
| Body Weight Changes:                   | Calculated between each scheduled interval as well as between the following intervals: from beginning to end of each phase. |
| Organ Weight Relative to Body Weight:  | Calculated against the terminal body weight for scheduled intervals.                                                        |
| Organ Weight Relative to Brain Weight: | Calculated against the brain weight for scheduled intervals.                                                                |

Additional or alternative body weight intervals may be evaluated to elucidate study results at the discretion of the Study Director.

**17. COMPUTERIZED SYSTEMS**

The following critical computerized systems may be used in the study. The actual computerized systems will be documented in the study data and/or the Final Report.

**Appendix 1****Critical Computerized Systems**

| <b>System Name</b>                                                                                         | <b>Description of Data Collected and/or Analyzed</b>                                                                                                                                            |
|------------------------------------------------------------------------------------------------------------|-------------------------------------------------------------------------------------------------------------------------------------------------------------------------------------------------|
| Provantis®                                                                                                 | In-life; clinical pathology; postmortem; Test Material receipt, accountability and/or formulation activities                                                                                    |
| Deviation Information Library                                                                              | Deviations                                                                                                                                                                                      |
| Share Document Management System                                                                           | Reporting                                                                                                                                                                                       |
| M-Files®                                                                                                   | Reporting and collection of 21 CFR Part 11 compliant signature                                                                                                                                  |
| eInfotree                                                                                                  | Excel Module for collection of 21 CFR Part 11 compliance requirements, security, audit trail, and electronic signatures                                                                         |
| DocuSign™                                                                                                  | Collection of 21 CFR Part 11 compliant signature                                                                                                                                                |
| SRS (CR-SEN in-house application built with SAS) and/or in-house reporting software Nevis 2012 (using SAS) | Cytokines                                                                                                                                                                                       |
| Mesa Laboratories AmegaView CMS                                                                            | Continuous Monitoring System. Monitoring of standalone fridges, freezers, incubators, and selected laboratories to measure temperature, relative humidity, and CO <sub>2</sub> , as appropriate |
| Johnson Controls Metasys                                                                                   | Building Automation System. Control of HVAC and other building systems, as well as temperature/humidity control and trending in selected laboratories and animal rooms                          |
| Watson LIMS                                                                                                | Sample management and data regression for cytokines assessment                                                                                                                                  |
| Bio Plex Manager (Luminex)                                                                                 | Data collection for Cytokines                                                                                                                                                                   |
| AcqKnowledge                                                                                               | Electrophysiological recording for nerve conduction velocity                                                                                                                                    |
| Excel                                                                                                      | Tabulated data entry for nerve conduction velocity                                                                                                                                              |
| SRS (CR-SEN in-house application built with SAS)                                                           | Table formatting for nerve conduction velocity                                                                                                                                                  |

Data for parameters not required by the Study Plan, which are automatically generated by analytical devices used will be retained on file but not reported. Statistical analysis results that are generated by the program but are not required by the Study Plan and/or are not scientifically relevant will be retained on file but will not be included in the tabulations.

**18. REGULATORY COMPLIANCE**

This study is not within the scope of regulations governing the conduct of nonclinical laboratory studies and is not intended to comply with such regulations.

**19. AMENDMENTS AND DEVIATIONS**

Changes to the approved Study Plan shall be made in the form of an amendment, which will be signed and dated by the Study Director. Every reasonable effort will be made to discuss any necessary study plan changes in advance with the Sponsor. The Study Director will notify the Sponsor of deviations that may result in a significant impact on the study as soon as possible.

**Appendix 1****20. RETENTION AND DISPOSITION OF RECORDS, SAMPLES, AND SPECIMENS**

All study-specific raw data, electronic data, documentation, study plan (and amendments, if any), retained samples and specimens, and interim (if applicable) and final reports will be archived by no later than the date of final report issue. All materials generated by Charles River from this study will be transferred to a Charles River archive. At least 1 year after issue of the Draft Report, the Sponsor will be contacted.

Disposition of residual/retained analytical samples will be as described in the table below.

**Disposition of Residual/Retained Samples**

| <b>Sample Type</b>      | <b>Disposition</b>      | <b>Schedule</b>                       |
|-------------------------|-------------------------|---------------------------------------|
| Bioanalytical (tissues) | Archived by the Sponsor | Samples to be archived by the Sponsor |
| Frozen tissues          |                         |                                       |

Records to be maintained will include, but will not be limited to, documentation and data for the following:

- Deviations, study plan, and study plan amendments
- Study schedule
- Study-related correspondence
- Test system receipt, health, and husbandry
- Test and reference item receipt, identification, preparation, and analysis
- In-life measurements and observations
- Clinical pathology sample collection and evaluation
- Cytokine sample collection and evaluation
- Gross and microscopic observations and related data
- Organ weight measurements
- Statistical analysis results

**• STUDY CLASSIFICATION**

Study Category: Toxicology

Study Type: Single Dose Toxicity

Study Design: Parallel

Primary Treatment CAS Registry Number: Not Available

Primary Treatment Unique Ingredient ID: Not Available

Class of Compound: AAV9 Vector

Administration Dose Form: Solution

**Appendix 1****21. REPORTING**

An abbreviated Draft Report will be prepared following completion of the study and will be finalized following consultation with the Sponsor. The report will include a summary of the experimental methods and all information necessary to provide a complete and accurate description of the results and any circumstances that may have affected the quality or integrity of the study.

The Sponsor will receive an electronic version of the Draft and Final Report provided in Adobe Acrobat PDF format (hyperlinked and searchable) along with a Microsoft Word version of the text. The PDF document will be created from native electronic files to the extent possible, including text and tables generated by the Test Facility. Report components not available in native electronic files and/or original signature pages will be scanned and converted to PDF image files for incorporation.

Reports should be finalized within 6 months of issue of the Draft Report. If the Sponsor has not provided comments to the report within 6 months of draft issue, the report will be finalized by the Test Facility unless other arrangements are made by the Sponsor.

**22. JUSTIFICATIONS AND GUIDELINES****22.1. Justification of Test System and Number of Animals**

At this time, studies in laboratory animals provide the best available basis for extrapolation to humans and are required to support regulatory submissions. Acceptable models that do not use live animals currently do not exist.

The cynomolgus monkey was chosen as the animal model for this study as it is an accepted nonrodent species for nonclinical toxicity testing by regulatory agencies.

The total number of animals to be used in this study is considered to be the minimum required to properly characterize the effects of the test item. This study has been designed such that it does not require an unnecessary number of animals to accomplish its objectives.

**22.2. Justification of Route and Dose Levels**

The intrathecal route of exposure was selected because this is the intended route of human exposure.

The dose levels were selected based on information provided by the Sponsors' prior studies with AAV9/AP4M1 in mice, as well as prior pharmacology for other similar AAV9 vectors in mice, rats, pigs, and nonhuman primates. Based on those prior pharmacology studies, the chosen low dose is anticipated to provide efficacy in ongoing mouse studies which should translate to humans. No clear dose-limiting toxicities were observed at doses equivalent to the low or high dose in mice. At one year postdose, 3 out of 10 mice receiving the high dose had hepatocellular adenoma, which could have been caused by the test item. The low dose in this NHP study corresponds to a nearly maximum feasible dose (MFD) due to limitations on injection volume

**Appendix 1**

and test item concentration, and this is the target dose for human translation. A 2x higher dose is achieved using a higher injection volume, and is included to evaluate a possible safety margin. None of the doses are expected to generate more than a minimal to moderate toxic effect. If any adverse effects are observed, the range of doses in the study design is an attempt to produce a graded response.

**22.3. Guidelines for Study**

The design of this study was based on the study objective(s) and the overall product development strategy for the test item.

**23. ANIMAL WELFARE**

The Study Plan and any amendment(s) or procedures involving the care and use of animals in this study will be reviewed and approved by CR-SEN Institutional Animal Care and Use Committee (IACUC). During the study, the care and use of animals will be conducted with guidance from the USA National Research Council and the Canadian Council on Animal Care (CCAC).

**24. REFERENCES**

Office of Laboratory Animal Welfare. *Public Health Services Policy on Humane Care and Use of Laboratory Animals*. Bethesda, MD: National Institutes of Health. Current edition.

**Appendix 1**

**TEST FACILITY APPROVAL**

All electronic signatures appear at the end of the document upon finalization.

**Appendix 1**

**SPONSOR APPROVAL**

The Study Plan was approved by the Sponsor by e-mail on the date designated below. The correspondence giving approval will be archived, as appropriate with other Sponsor communications.

29 Jun 2021

---

Date of Sponsor Approval

**Appendix 1****ATTACHMENT A****Tissue Weighing, Collection, Processing, and Evaluation Table**

| <b>Organ</b>                                                                                             | <b>Weigh</b>   | <b>Macroscopic<br/>Evaluation<br/>and<br/>Collection</b> | <b>Histology<br/>Processing</b> | <b>Microscopic<br/>Evaluation</b> | <b>Bioanalysis</b>                                                                                                                          |
|----------------------------------------------------------------------------------------------------------|----------------|----------------------------------------------------------|---------------------------------|-----------------------------------|---------------------------------------------------------------------------------------------------------------------------------------------|
| Animal ID                                                                                                | -              | X                                                        | -                               | -                                 | -                                                                                                                                           |
| Artery, aorta                                                                                            | -              | X                                                        | X                               | -                                 | -                                                                                                                                           |
| Bone marrow, sternum                                                                                     | -              | X                                                        | X                               | -                                 | -                                                                                                                                           |
| Bone marrow smear                                                                                        | -              | X <sup>a</sup>                                           | -                               | -                                 | -                                                                                                                                           |
| Bone, femur, right                                                                                       | -              | X                                                        | X                               | -                                 | -                                                                                                                                           |
| Bone, sternum                                                                                            | -              | X                                                        | X                               | -                                 | -                                                                                                                                           |
| Brain                                                                                                    | X              | X                                                        | X                               | X (left)                          | X (right) (cerebellum, hippocampus, cortex (frontal, parietal, occipital, and temporal lobes), striatum, thalamus, midbrain, pons, medulla) |
| Epididymis                                                                                               | X (2)          | X (2)                                                    | X (2)                           | -                                 | -                                                                                                                                           |
| Esophagus                                                                                                | -              | X                                                        | X                               | -                                 | -                                                                                                                                           |
| Eye                                                                                                      | -              | X (2)                                                    | X (2)                           | -                                 | -                                                                                                                                           |
| Gallbladder                                                                                              | - <sup>b</sup> | X                                                        | X                               | -                                 | -                                                                                                                                           |
| Ganglion, dorsal root, (cervical, lumbar, and thoracic with dorsal and ventral nerve roots) <sup>f</sup> | -              | X (2)                                                    | X (2)                           | X (2)                             | X – DRG only (2) (C6-C7, T1-T2, L4)                                                                                                         |
| Ganglion, trigeminal                                                                                     | -              | X                                                        | X (left)                        | X (left)                          | X (right)                                                                                                                                   |
| Gland, adrenal                                                                                           | X (2)          | X (2)                                                    | X (2)                           | -                                 | -                                                                                                                                           |
| Gland, lacrimal                                                                                          | -              | X (2)                                                    | -                               | -                                 | -                                                                                                                                           |
| Gland, mammary                                                                                           | -              | X                                                        | X                               | -                                 | -                                                                                                                                           |
| Gland, parathyroid                                                                                       | - <sup>c</sup> | X (2)                                                    | X (2)                           | -                                 | -                                                                                                                                           |
| Gland, pituitary                                                                                         | X              | X                                                        | X                               | -                                 | -                                                                                                                                           |
| Gland, prostate                                                                                          | X              | X                                                        | X                               | -                                 | -                                                                                                                                           |
| Gland, salivary, submandibular                                                                           | -              | X (2)                                                    | X (1)                           | -                                 | -                                                                                                                                           |
| Gland, salivary, sublingual                                                                              | -              | X (2)                                                    | -                               | -                                 | -                                                                                                                                           |
| Gland salivary, parotid                                                                                  | -              | X (2)                                                    | -                               | -                                 | -                                                                                                                                           |
| Gland, seminal vesicle                                                                                   | -              | X (2)                                                    | X (2)                           | -                                 | -                                                                                                                                           |
| Gland, thyroid                                                                                           | X (2)          | X (2)                                                    | X (2)                           | -                                 | -                                                                                                                                           |
| Gut-associated lymphoid tissue <sup>d</sup>                                                              | -              | X                                                        | X                               | -                                 | -                                                                                                                                           |
| Heart                                                                                                    | X              | X                                                        | X                               | X                                 | X                                                                                                                                           |
| Joint, femorotibial, right                                                                               | -              | X                                                        | X                               | -                                 | -                                                                                                                                           |
| Kidney                                                                                                   | X (2)          | X (2)                                                    | X (2)                           | X (2)                             | X (right)                                                                                                                                   |
| Large intestine, cecum                                                                                   | -              | X                                                        | X                               | -                                 | -                                                                                                                                           |
| Large intestine, colon                                                                                   | -              | X                                                        | X                               | -                                 | -                                                                                                                                           |

**Appendix 1**

| <b>Organ</b>                                                                              | <b>Weight</b> | <b>Macroscopic<br/>Evaluation<br/>and<br/>Collection</b> | <b>Histology<br/>Processing</b> | <b>Microscopic<br/>Evaluation</b> | <b>Bioanalysis</b>       |
|-------------------------------------------------------------------------------------------|---------------|----------------------------------------------------------|---------------------------------|-----------------------------------|--------------------------|
| Large intestine, rectum                                                                   | -             | X                                                        | X                               | -                                 | -                        |
| Liver                                                                                     | X             | X                                                        | X                               | X                                 | X (left lateral)         |
| Lung                                                                                      | -             | X                                                        | X                               | -                                 | X                        |
| Lymph node(s) draining<br>administration site(s): deep<br>cervical and iliac              | -             | X (2)                                                    | X (2)                           | X (2)                             | -                        |
| Lymph node, mandibular                                                                    | -             | X (2)                                                    | X (1)                           | -                                 | -                        |
| Lymph node, mesenteric                                                                    | -             | X                                                        | X                               | -                                 | -                        |
| Muscle, skeletal,<br>gastrocnemius                                                        | -             | X (2)                                                    | X (1)                           | -                                 | X (1, right)             |
| Muscle, skeletal, biceps<br>femoris                                                       | -             | X (2)                                                    | -                               | -                                 | X (1, right)             |
| Nerve, optic                                                                              | -             | X (2)                                                    | X (2)                           | -                                 | X (1, right)             |
| Nerve, sciatic                                                                            | -             | X (2)                                                    | X (1)                           | X (1)                             | X (1, right)             |
| Nerve, tibial                                                                             | -             | X (2)                                                    | -                               | -                                 | X (1, right)             |
| Ovary                                                                                     | X (2)         | X (2)                                                    | X (2)                           | -                                 | X (1, right)             |
| Oviduct                                                                                   | -             | X (2)                                                    | -                               | -                                 | -                        |
| Pancreas                                                                                  | -             | X                                                        | X                               | -                                 | -                        |
| Skin                                                                                      | -             | X                                                        | X                               | -                                 | -                        |
| Small intestine, duodenum                                                                 | -             | X                                                        | X                               | -                                 | -                        |
| Small intestine, ileum                                                                    | -             | X                                                        | X                               | -                                 | -                        |
| Small intestine, jejunum                                                                  | -             | X                                                        | X                               | -                                 | -                        |
| Spinal cord (cervical, lumbar,<br>and thoracic, including<br>injection site) <sup>e</sup> | -             | X                                                        | X                               | X                                 | X<br>(C6-C7, T9-T12, L4) |
| Spleen                                                                                    | X             | X                                                        | X                               | X                                 | X                        |
| Stomach                                                                                   | -             | X                                                        | X                               | -                                 | -                        |
| Testis                                                                                    | X (2)         | X (2)                                                    | X (2)                           | -                                 | X (1, right)             |
| Thymus                                                                                    | X             | X                                                        | X                               | -                                 | X                        |
| Tongue                                                                                    | -             | X                                                        | X                               | -                                 | -                        |
| Trachea                                                                                   | -             | X                                                        | X                               | -                                 | -                        |
| Ureter                                                                                    | -             | X (2)                                                    | -                               | -                                 | -                        |
| Urinary bladder                                                                           | -             | X                                                        | X                               | -                                 | -                        |
| Uterus/Cervix                                                                             | X             | X                                                        | X                               | -                                 | -                        |
| Vagina                                                                                    | -             | X                                                        | X                               | -                                 | -                        |

**Appendix 1**

| <b>Organ</b> | <b>Weigh</b> | <b>Macroscopic<br/>Evaluation<br/>and<br/>Collection</b> | <b>Histology<br/>Processing</b> | <b>Microscopic<br/>Evaluation</b> | <b>Bioanalysis</b> |
|--------------|--------------|----------------------------------------------------------|---------------------------------|-----------------------------------|--------------------|
|--------------|--------------|----------------------------------------------------------|---------------------------------|-----------------------------------|--------------------|

X = Procedure to be conducted. - = Not applicable. (1) = one side. (2) = both sides.

Macroscopic abnormalities in the organs listed and in other organs will be sampled at necropsy, processed for histology and examined microscopically.

- <sup>a</sup> Bone marrow smears will be collected from the 5th to 7th rib at scheduled and unscheduled necropsies (for possible examination). Smears will not be collected from animals that are found dead or from animals that were euthanized moribund and then stored in the refrigerator prior to necropsy. Bone marrow smears are allowed to air dry and are not fixed in formalin.
- <sup>b</sup> Weigh with liver.
- <sup>c</sup> Weigh with gland, thyroid.
- <sup>d</sup> From small intestine: Peyer's patch or solitary lymphoid follicle.
- <sup>e</sup> Transverse and/or oblique sections.
- <sup>f</sup> Nerve roots will be examined if present in section of dorsal root ganglia.

**Appendix 1****ATTACHMENT B****Brain Collection Procedure**

1. The brain matrix to be used will be chilled in a saline ice bath. Following collection of the brain, it will be placed in the matrix in the ice bath for approximately 10 minutes to firm up the tissue prior to processing
2. The brain slicing will be performed as per diagram below:

**Slice number**

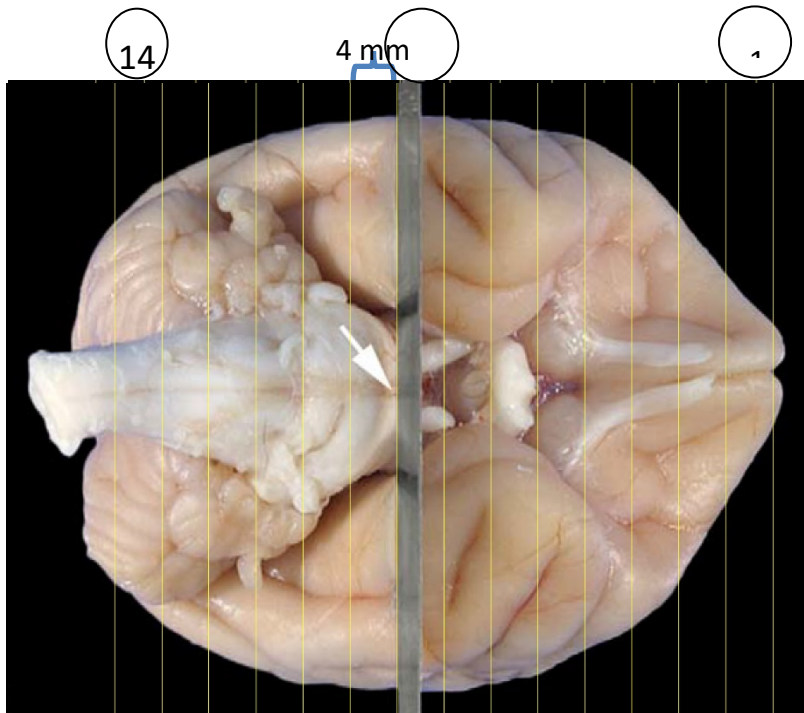

**NOTE:** The initial razor cut should be consistent for all specimens (i.e. start from rostral to pons), with all subsequent slices taken 4mm apart. The starting location for slicing will be recorded with in the study data.

3. Following complete sectioning of the brain within the matrix, the brain will be carefully removed and each individual brain slab will be laid out flat in consecutive order, with the caudal face of each slab oriented against the table/bench (rostral face of each slice will be face up).
4. Each brain slab will then be cut sagittally, to separate the hemispheres Right and Left.
5. The hemisphere will then be punched as per Sections [15.7](#), [15.8](#), [15.9](#) and Attachment D, and the remaining tissue from both hemispheres will be frozen flat indirectly on dry ice, then placed flat into appropriately sized cassettes labeled with group number, animal number and brain section number and stored at -80°C or placed in 10% NBF.

**Appendix 1****ATTACHMENT C****Shipment of Samples and Study Records**

| <b>Matrix</b>                 | <b>Purpose</b>       | <b>Day/<br/>Week/<br/>Aliquot</b> | <b>Proposed<br/>Shipment<br/>Date</b> | <b>Conditions<br/>for<br/>Shipment</b> | <b>Recipient/Address</b>                                                                                                                                                                                                                                             |
|-------------------------------|----------------------|-----------------------------------|---------------------------------------|----------------------------------------|----------------------------------------------------------------------------------------------------------------------------------------------------------------------------------------------------------------------------------------------------------------------|
| Bulk test item                | Return to<br>Sponsor | Not<br>applicable                 | Following<br>completion<br>of dosing  | Dry ice                                | Attention to:<br>Steven Gray, PhD<br>University of Texas Southwestern Medical<br>Center<br>NA2.508<br>5323 Harry Hines Blvd<br>University of Texas Southwestern Medical<br>Center<br>Dallas, TX 75390<br>Tel: 214-648-0670<br>E-mail: steven.gray@UTSouthwestern.edu |
| Residual Dose<br>Formulations |                      |                                   |                                       |                                        |                                                                                                                                                                                                                                                                      |
| Additional<br>Serum           | Archival             | Not<br>applicable                 | Following<br>the last<br>collection   | Dry ice                                | Attention to:<br>Juan A. Rodriguez<br>University of Texas Southwestern 5901<br>Forest Park Rd,<br>NA2.508 Receiving – North Campus Dock<br>Dallas, TX 75390<br>Tel: 281-380-5165 E-mail:<br>Juan.Rodriguez@UTSouthwestern                                            |
| Tissues                       | Bioanalysis          | Not<br>applicable                 | Within 2<br>weeks from<br>collection  | Dry ice                                | Attention to:<br>Juan A. Rodriguez<br>University of Texas Southwestern 5901<br>Forest Park Rd,<br>NA2.508 Receiving – North Campus Dock<br>Dallas, TX 75390<br>Tel: 281-380-5165 E-mail:<br>Juan.Rodriguez@UTSouthwestern                                            |

Alternate shipping details may be provided thereafter and will be documented in study correspondence.

**Appendix 1**

**Signatures:**

|                                                                                   |                                  |
|-----------------------------------------------------------------------------------|----------------------------------|
| <b><u>Testing Facility Management Approval:</u></b>                               |                                  |
| I approve this document.                                                          |                                  |
| Name:                                                                             | <b>Parente, Carmela</b>          |
|                                                                                   | <i>Parente, Carmela</i>          |
|                                                                                   | 29-Jun-2021 13:34:47 (UTC+00:00) |
| Electronically Signed in                                                          | Timestamp                        |
| 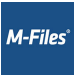 |                                  |

|                                                                                     |                                  |
|-------------------------------------------------------------------------------------|----------------------------------|
| <b><u>Study Director Approval:</u></b>                                              |                                  |
| I approve this document.                                                            |                                  |
| Name:                                                                               | <b>Cinquino, Stefania</b>        |
|                                                                                     | <i>Cinquino, Stefania</i>        |
|                                                                                     | 29-Jun-2021 13:35:35 (UTC+00:00) |
| Electronically Signed in                                                            | Timestamp                        |
| 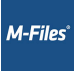 |                                  |

**Appendix 2**

Product: rAAV9-AP4M1  
Batch Number: T-GEMINIS-033

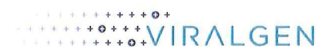**Certificate Of Analysis**

*Research grade - Not for human use.*

**Client identification:** CURE SPG50

**Product Name and type of product:** rAAV9, sterile suspension of rAAV9 vector carrying the AP4M1 therapeutic gene.

**Batch Number:** T-GEMINIS-033

**Quality grade:** Research grade

**Production process:** 50 Liters batch

**Manufacturing date:** 22 December 2020

**Formulation buffer (FMR-T-0043):** MilliQ Water, 1X dPBS, 5% D-Sorbitol, 0.001% Pluronic

**Vials Shipped:** 34 x 0.5 ml vialled in polypropylene Cryotubes

**Shipment Date:** 19 January 2021

**Transport conditions:** Dry ice

**Storage conditions:**  $\leq -60^{\circ}\text{C}$

Performed by: Paz López (QC Coordinator)

Date:

29- APRIL - 2021

Reviewed by: Sandy Douthe (QC Manager)

Date:

29 APRIL 2021

Reviewed by: Begoña Ortega (QA Technician)

Date: 29 - APRIL 2021

**Appendix 2**

Product: rAAV9-AP4M1

Batch Number: T-GEMINIS-033

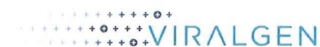**rAAV Purified Bulk / Bulk Drug Substance assays:**

| ASSAY                                                   | METHOD                                                                                      | TEST SITE     | SPECIFICATION  | RESULT                                                                                                                                                         |
|---------------------------------------------------------|---------------------------------------------------------------------------------------------|---------------|----------------|----------------------------------------------------------------------------------------------------------------------------------------------------------------|
| <b>SAFETY ASSAYS</b>                                    |                                                                                             |               |                |                                                                                                                                                                |
| Replication competent AAV                               | PT/133 & PT/025<br>Infection of permissive cell line/Rep2 qPCR (based on ITRqPCR titration) | Genosafe      | Report result  | Not Detected<br><10 rcAAV in 1x10 <sup>11</sup> vg                                                                                                             |
| <b>STRENGTH ASSAYS</b>                                  |                                                                                             |               |                |                                                                                                                                                                |
| Vector genome titer (vg/mL)                             | PNT-CC-005<br>ITR qPCR                                                                      | Viralgen      | report results | 1.71x10 <sup>14</sup>                                                                                                                                          |
| Vector genome titer (vg/ml)                             | PNT-CC-049<br>ITRddPCR                                                                      | Viralgen      | report results | 5.17x10 <sup>13</sup>                                                                                                                                          |
| <b>PURITY ASSAYS</b>                                    |                                                                                             |               |                |                                                                                                                                                                |
| General Purity                                          | PNT-CC-012<br>SDS-Page/<br>silver stain                                                     | Viralgen      | Report result  | Detection VP1, VP2 and VP3. Presence of extra bands between 150-250 KDa                                                                                        |
| Residual Host Cell Protein (ng/mL)                      | PNT-CC-023<br>HEK293 ELISA Assay                                                            | Viralgen      | Report result  | <100                                                                                                                                                           |
| Residual Host Cell DNA (pg/mL with and without DNase)   | PNT-CC-033<br>18S qPCR (123 and 254 bp amplicons)                                           | Viralgen      | Report result  | 123 bp:<br>6.86x10 <sup>6</sup> (+DNase I)<br>7.38x10 <sup>6</sup> (-DNase I)<br>254 bp:<br>5.02x10 <sup>6</sup> (+DNase I)<br>5.21x10 <sup>6</sup> (-DNase I) |
| Residual Host Cell DNA (pg/mL, without DNase)           | SP-M.8303<br>E1A qPCR                                                                       | SGS-Vitrology | Report result  | 2.6x10 <sup>6</sup>                                                                                                                                            |
| Residual Plasmid DNA (copies/mL with and without DNase) | PNT-CC-014<br>KanaR qPCR                                                                    | Viralgen      | Report result  | 9.61x10 <sup>11</sup> (+Dnase I)<br>1.26x10 <sup>12</sup> (-Dnase I)                                                                                           |
| Full/Empty particles ratio                              | V6725<br>CryoTEM                                                                            | Vironova      | >50% full      | Filled: 84%<br>Empty: 9%<br>Uncertain: 7%                                                                                                                      |

**Appendix 2**

Product: rAAV9-AP4M1

Batch Number: T-GEMINIS-033

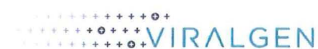

| ASSAY                                          | METHOD                                  | TEST SITE | SPECIFICATION                               | RESULT                                         |
|------------------------------------------------|-----------------------------------------|-----------|---------------------------------------------|------------------------------------------------|
| <b>PURITY ASSAYS</b>                           |                                         |           |                                             |                                                |
| Aggregation                                    | V0149 & V0692<br>nsTEM                  | Vironova  | Report result                               | 92% of the<br>individual particles<br>at <40nm |
| Residual Chemical<br>(Transfection<br>reagent) | Refer to DMF                            | DocuChem  | Report result                               | <25.13 ppm<br>>12.57 ppm                       |
| Residual Chemical<br>(Lysis reagent)           | Refer to DMF                            |           | Report result                               | <LOD (1 ppm)                                   |
| Residual Chemical<br>(Clarifying reagent)      | Refer to DMF                            |           | Report result                               | <1.03 ppm<br>>0.21 ppm                         |
| Residual Chemical<br>(Iodixanol)               | HPLC                                    |           | Report result                               | <3.12 ppm<br>>1.04 ppm                         |
| Residual Chemical<br>(Antifoam)                | Refer to DMF                            |           | Report result                               | <LOD (5 ppm)                                   |
| Residual Affinity<br>Ligand (ng/mL)            | PNT-CC-037<br>ELISA                     | Viralgen  | Report result                               | 511.3                                          |
| <b>IDENTITY ASSAYS</b>                         |                                         |           |                                             |                                                |
| Protein Identity                               | PNT-CC-003<br>SDS-PAGE/<br>Western Blot | Viralgen  | Detection of VP1,<br>VP2 & VP3              | Detection of VP1,<br>VP2 and VP3               |
| Genome identity                                | PNT-143<br>Sequencing (Sanger)          | Secugen   | 100% conform to<br>sequence of<br>reference | Conform                                        |

**Appendix 2**

Product: rAAV9-AP4M1

Batch Number: T-GEMINIS-033

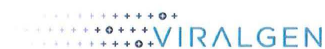**rAAV Final Product / Drug Product assays:**

| ASSAY                        | METHOD                            | TEST SITE  | SPECIFICATION                                                             | RESULT                                                                 |
|------------------------------|-----------------------------------|------------|---------------------------------------------------------------------------|------------------------------------------------------------------------|
| <b>SAFETY ASSAYS</b>         |                                   |            |                                                                           |                                                                        |
| Sterility                    | LTMI-009                          | Biolab S.L | No growth                                                                 | No growth                                                              |
| Endotoxin (EU/ml)            | PNT-CC-015<br>Kinetic chromogenic | Viralgen   | <0.2                                                                      | <0.051                                                                 |
| <sup>1</sup> Mycoplasma      | PNT-CC-001<br>PCR end point       | Viralgen   | Negative                                                                  | Negative                                                               |
| <b>STRENGHT ASSAYS</b>       |                                   |            |                                                                           |                                                                        |
| Vector genome titer (vg/mL)  | PNT-CC-005<br>ITR qPCR            | Viralgen   | 0.75x10 <sup>14</sup> -4x10 <sup>14</sup><br>Target 1.70x10 <sup>14</sup> | 2.17x10 <sup>14</sup>                                                  |
| Vector genome titer (vg/ml)  | PNT-CC-049<br>ITRddPCR            | Viralgen   | Report Result                                                             | 5.43x10 <sup>13</sup>                                                  |
| Infectious titer (TCID50/mL) | PNT-CC-004<br>TCID50/ITRqPCR      | Viralgen   | Report result                                                             | 1.02x10 <sup>10</sup>                                                  |
| vg/TCID50 (ITRqPCR) ratio    | N/A                               | Viralgen   | Report result                                                             | 21237.16                                                               |
| <b>QUALITY ASSAYS</b>        |                                   |            |                                                                           |                                                                        |
| Osmolality (mOsm/Kg)         | PNT-CC-016<br>Freezing point      | Viralgen   | 587 +/-50                                                                 | 570                                                                    |
| pH                           | PNT-CC-044<br>Potentiometry       | Viralgen   | 7.4±0.4                                                                   | 7.21                                                                   |
| Appearance                   | PNT-CC-017<br>Visual inspection   | Viralgen   | Colorless, clear to slightly opalescent, free of visible particles        | Not done because viald in polypropylene cryovials                      |
| Particles size distribution  | PNT-CC-053<br>DLS                 | Viralgen   | Report Results                                                            | 99-99.5% of particulate volume between 23.98-25.25 nm in mean diameter |

<sup>1</sup> Mycoplasma assay performed in the transfection pool.

**Appendix 2**

Product: rAAV9-AP4M1  
Batch Number: T-GEMINIS-033

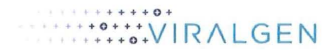**1. Test Information: General purity and protein identity by SDS-PAGE/Silver staining and Western Blot analysis**

According to the standard operating procedure PNT-CC-012\_Pureza del vector por SDS\_PAGE\_TINCION DE PLATA, and the PNT-CC-003\_Identificación de proteínas por Western Blot.

**1.1 Gel Properties: 10% Acrylamide gel****1.2. SDS-PAGE Results:**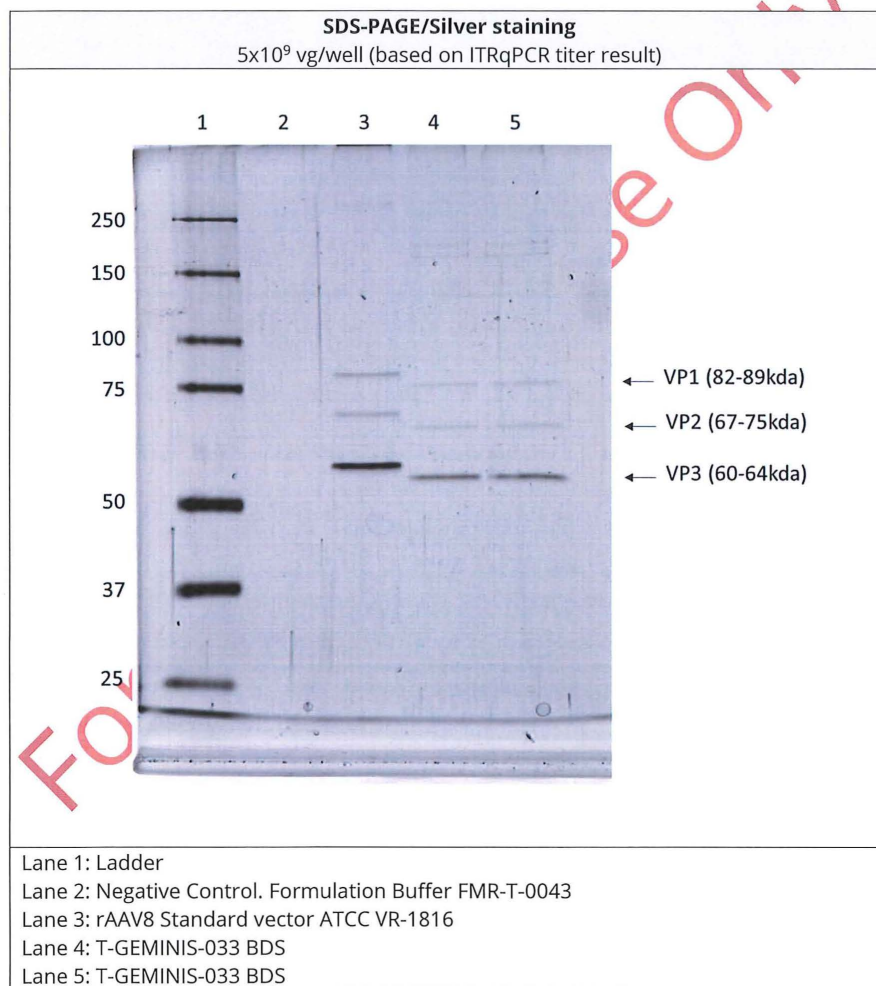

Presence of extra-bands between 150-250 KDa. An investigational analysis was done and the extra bands were identified as encapsidated (or not accessible to DNase) DNA.

**Appendix 2**

Product: rAAV9-AP4M1  
Batch Number: T-GEMINIS-033

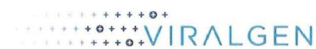**1.3. SDS-PAGE/Western blot Results:**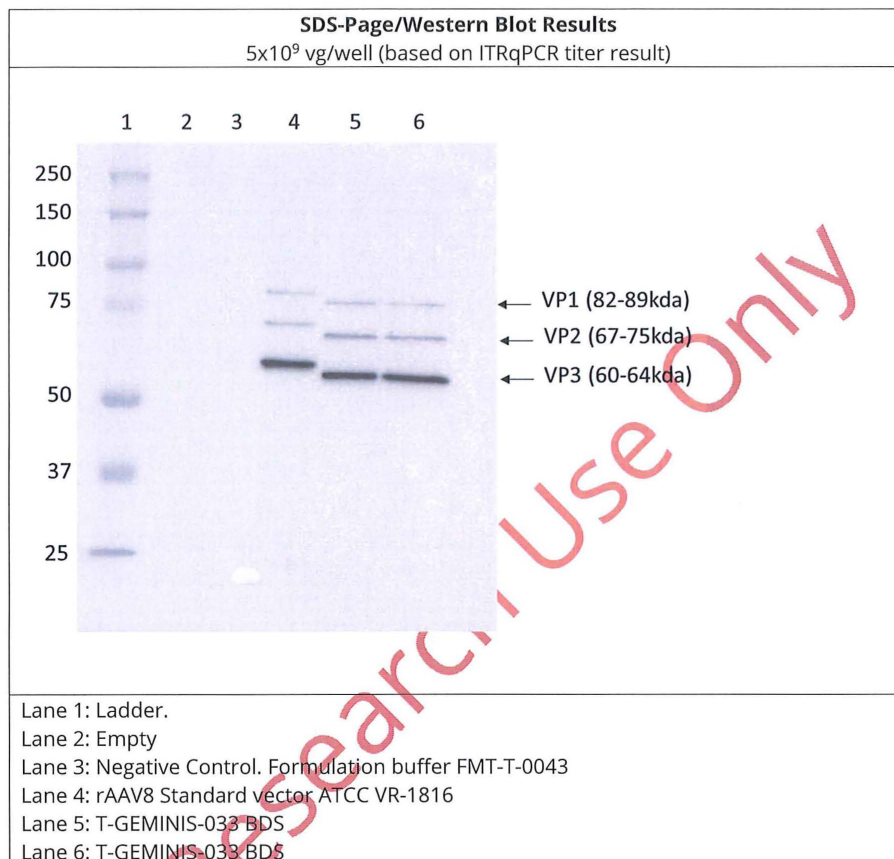

## Appendix 2

**Product Name:** FMR-T-0043

**Batch Number:** 2021-02-09/01

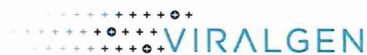

### **Certificate Of Analysis**

*Research grade - Not for human use*

**Name and type of product:** FMR-T-0043/ Formulation buffer

**Batch Number:** 2021-02-09/01

**Date of manufacture:** 9<sup>th</sup> February 2021 (vialing date).

**Composition:** 1xPBS, 5% sorbitol and 0.001% pluronic

**Quality grade:** Research grade

**Primary container:** Polypropylene Cryotubes 1,2 ml

**Batch size:** 30 vials containing 0,5 ml of buffer

**Name and address of the manufacturer:**

VIRALGEN - Parque Tecnológico de Gipuzkoa - Paseo Mikeletegi 83, 2ª Planta.

CP20009 San Sebastián, SPAIN. Tel: +34 943 477 733.

**Appendix 2****Product Name:** FMR-T-0043**Batch Number:** 2021-02-09/01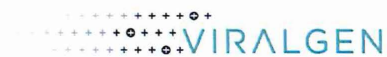

| TEST                                   | METHOD                               | TEST SITE | RESULT      |
|----------------------------------------|--------------------------------------|-----------|-------------|
| <sup>(1)</sup> Bioburden               | PNT-CC-026<br>Filtration             | Viralgen  | <1CFU/10 ml |
| <sup>(1)</sup> Endotoxins (EU/mL)      | PNT-CC-015<br>Kinetic<br>chromogenic | Viralgen  | <0.050      |
| <sup>(2)</sup> pH                      | Potenciometry                        | Viralgen  | 7.35        |
| <sup>(2)</sup> Conductivity<br>(mS/cm) | Conductimetry                        | Viralgen  | 14.08       |

<sup>(1)</sup> Assays done at Viralgen Vector Core Quality Control laboratories<sup>(2)</sup> Assays done at the time of buffer preparation by the downstream Process team following the formulation record procedure described on FMR-T-0043**Performed by:** Paz López (QC Deputy Director)**Date:** 05<sup>th</sup> January 2022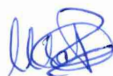  
PLM

**Individual In-life Data Explanation Page****Individual Mortality**

| Abbreviation | Description                                                       | Abbreviation | Description                                                         |
|--------------|-------------------------------------------------------------------|--------------|---------------------------------------------------------------------|
| -            | Not scheduled to be performed / Not seen                          | Path         | Pathology                                                           |
| AM SIR       | Signs of ill health or reaction to treatment check in the morning | PM SIR       | Signs of ill health or reaction to treatment check in the afternoon |
| NR           | Not recorded                                                      |              |                                                                     |

**Individual Clinical Observations**

| Abbreviation | Description                                                       | Abbreviation       | Description                                                         |
|--------------|-------------------------------------------------------------------|--------------------|---------------------------------------------------------------------|
| ./-          | Not scheduled to be performed / Not seen / Dead                   | PAM                | Detailed examination in the afternoon                               |
| AM_S         | Signs of ill health or reaction to treatment check in the morning | Part               | Particles                                                           |
| CAM          | Cage side observation in the morning                              | PM_S               | Signs of ill health or reaction to treatment check in the afternoon |
| Cp #         | Cage side observation post dose                                   | pr #/PR #/Pre (PT) | Observation predose Permanent                                       |
| CPM          | Cage side observation in the afternoon                            |                    |                                                                     |
| Cpr          | Cage side observation predose                                     | Sev Not App        | Severity not applicable                                             |
| CSO          | Cage side observation                                             | Sev Not Rec        | Severity not recorded                                               |
| DAM          | Detailed examination in the morning                               | SIRT               | Signs of ill health or reaction to treatment                        |
| DE/D         | Detailed examination                                              | U #/Up #           | Unscheduled observation post dose                                   |
| DuRx         | Observation during dosing                                         | UDu #              | Unscheduled observation during dosing                               |
| DW           | Detailed examination weekly                                       | Un #/Unsc #        | Unscheduled observation                                             |
| Fev          | Food evaluation                                                   | Upr #              | Unscheduled observation predose                                     |
| IM           | Intramuscular                                                     | Vet                | Anything observed by veterinary staff                               |
| Inj          | Injection                                                         | (VET)              | Symptom recorded by veterinary staff                                |
| Inter        | Internal                                                          | w/                 | with                                                                |
| OTHR         | Other                                                             | #                  | Number to avoid using the same timeslot/animal/day                  |
| p #/ P #     | Observation post dose                                             |                    |                                                                     |

Note: Only animals with findings are presented in this appendix.

**Individual Body Weights**

| Abbreviation | Description                        | Abbreviation | Description                                   |
|--------------|------------------------------------|--------------|-----------------------------------------------|
| ./-          | Not scheduled to be performed/dead | OA           | Omitted activity                              |
| < or >       | Out of range                       | RC           | Result comment                                |
| FC           | Flag comment                       | TERR         | Technical error                               |
| NT           | Not taken                          | UPTD         | Unable to perform due to technical difficulty |

**Individual Body Weight Gains**

| Abbreviation | Description                        | Abbreviation | Description                                   |
|--------------|------------------------------------|--------------|-----------------------------------------------|
| ./-          | Not scheduled to be performed/dead | OA           | Omitted activity                              |
| < or >       | Out of range                       | RC           | Result comment                                |
| FC           | Flag comment                       | TERR         | Technical error                               |
| NT           | Not taken                          | UPTD         | Unable to perform due to technical difficulty |

**Individual Neurological Examinations Explanation Page**

| Abbreviation | Description                   | Abbreviation | Description                        |
|--------------|-------------------------------|--------------|------------------------------------|
| ./-          | Not scheduled to be performed | TERR         | Technical error                    |
| NHP          | Non-human primate             | TNR          | Test not reported                  |
| OA           | Omitted activity              | R            | Right                              |
| Gen Att      | General Attitude              | RC           | Result comment                     |
| Lat Pos      | Lateral recumbency position   | RF           | Right Forelimb                     |
| L            | Left                          | RH/hr        | Right Hindlimb                     |
| LF           | Left Forelimb                 | Reac / Rea   | Reactions                          |
| LH/hl        | Left Hindlimb                 | Ref          | Reflex                             |
| Mot Function | Motor Function                | Tact         | Tactile                            |
| Not Eval     | Not evaluated                 | Vis          | Visual                             |
| Proprio Pos  | Proprioceptive Positioning    | Wheelbarrow  | Wheel barrowing                    |
| hl           | Hand left                     | hr           | Hand right                         |
| DE           | Detailed examination          | 4-6H         | Observation 4 to 6 hours post dose |

Note: This is a comprehensive list of abbreviations. All of the abbreviations listed may not be applicable to this report.

**Dosing Information**

Dosing information is abbreviated on various data outputs; the following represents the dosing information for this study.

| Group No. | Test Material  | Dose Level (vg)       |
|-----------|----------------|-----------------------|
| 1         | Reference Item | 0                     |
| 2         | AAV9/AP4M1     | $8.4 \times 10^{13}$  |
| 3         | AAV9/AP4M1     | $1.68 \times 10^{14}$ |

Sponsor Reference No. UTSW-Gray-SPG50-004

Test Facility Study No. 5550014

**Appendix 3****Individual Mortality****5550014**

Sex: Male Day(s): - Relative to Start Date

|                        |              |              |                        |
|------------------------|--------------|--------------|------------------------|
| 0<br>vg<br><br>Group 1 |              |              |                        |
|                        | Day of Death | Removal Date | Path Removal<br>Reason |
| 1201                   | 94           | 14-Oct-2021  | TERM                   |

TE/TERM = Terminal Euthanasia FD = Found Dead UE/UNSC = Unscheduled Euthanasia

REL = Released

AD/ACCD = Accidental death

IE/INTM = Interim Euthanasia REC = Recovery Euthanasia

Sponsor Reference No. UTSW-Gray-SPG50-004

Test Facility Study No. 5550014

**Appendix 3****Individual Mortality****5550014**

Sex: Male Day(s): - Relative to Start Date

|                                 |              |              |                        |
|---------------------------------|--------------|--------------|------------------------|
| 1.68<br>X10E14<br>vg<br>Group 3 | Day of Death | Removal Date | Path Removal<br>Reason |
| 3201                            | 94           | 14-Oct-2021  | TERM                   |

TE/TERM = Terminal Euthanasia FD = Found Dead UE/UNSC = Unscheduled Euthanasia

REL = Released

AD/ACCD = Accidental death

IE/INTM = Interim Euthanasia REC = Recovery Euthanasia

Sponsor Reference No. UTSW-Gray-SPG50-004

Test Facility Study No. 5550014

**Appendix 3****Individual Mortality****5550014**

Sex: Female Day(s): - Relative to Start Date

|                        |              |              |                        |
|------------------------|--------------|--------------|------------------------|
| 0<br>vg<br><br>Group 1 |              |              |                        |
|                        | Day of Death | Removal Date | Path Removal<br>Reason |
| 1701                   | 94           | 14-Oct-2021  | TERM                   |

TE/TERM = Terminal Euthanasia FD = Found Dead UE/UNSC = Unscheduled Euthanasia

REL = Released

AD/ACCD = Accidental death

IE/INTM = Interim Euthanasia REC = Recovery Euthanasia

Sponsor Reference No. UTSW-Gray-SPG50-004

Test Facility Study No. 5550014

**Appendix 3****Individual Mortality****5550014**

Sex: Female Day(s): - Relative to Start Date

| 8.4<br>X10E13<br>vg<br>Group 2 |              |              |                     |
|--------------------------------|--------------|--------------|---------------------|
|                                | Day of Death | Removal Date | Path Removal Reason |
| 2701                           | 94           | 14-Oct-2021  | TERM                |
| 2702                           | 94           | 14-Oct-2021  | TERM                |

TE/TERM = Terminal Euthanasia FD = Found Dead UE/UNSC = Unscheduled Euthanasia

REL = Released

AD/ACCD = Accidental death

IE/INTM = Interim Euthanasia REC = Recovery Euthanasia

Sponsor Reference No. UTSW-Gray-SPG50-004

Test Facility Study No. 5550014

**Appendix 3****Individual Mortality****5550014**

Sex: Female Day(s): - Relative to Start Date

|                                 |              |              |                        |
|---------------------------------|--------------|--------------|------------------------|
| 1.68<br>X10E14<br>vg<br>Group 3 | Day of Death | Removal Date | Path Removal<br>Reason |
| 3701                            | 94           | 14-Oct-2021  | TERM                   |

TE/TERM = Terminal Euthanasia FD = Found Dead UE/UNSC = Unscheduled Euthanasia

REL = Released

AD/ACCD = Accidental death

IE/INTM = Interim Euthanasia REC = Recovery Euthanasia

Sponsor Reference No. UTSW-Gray-SPG50-004

Test Facility Study No. 5550014

**Appendix 4****Individual Clinical Observations****5550014**

| 0<br>vg<br>Group 1<br>Sex: Male | Observation Type: All Types                | Day(s) Relative to Start Date |          |         |          |          |            |          |
|---------------------------------|--------------------------------------------|-------------------------------|----------|---------|----------|----------|------------|----------|
|                                 |                                            | -8<br>DE                      | -1<br>DE | 7<br>DE | 14<br>DE | 21<br>DE | 25<br>AM_S | 28<br>DE |
| 1201                            | Hunched Posture                            | .                             | .        | .       | .        | .        | .          | .        |
|                                 | Fur, Thin Cover, Dorsal Aspect Generalized | .                             | .        | .       | .        | .        | .          | .        |
|                                 | Fur, Thin Cover, Hindlimb, Left            | .                             | .        | .       | .        | .        | .          | .        |
|                                 | Fur, Thin Cover, Hindlimb, Right           | .                             | .        | .       | .        | .        | .          | .        |
|                                 | Fur, Thin Cover, Tail                      | .                             | .        | .       | .        | .        | .          | .        |
|                                 | Skin, Dry, Tail                            | X                             | X        | X       | X        | X        | .          | X        |
|                                 | Skin, Discolored, Hindlimb, Left, Red      | .                             | .        | .       | .        | .        | .          | X        |
|                                 | Skin, Discolored, Inguinal, Left, Red      | .                             | X        | X       | X        | X        | .          | .        |
|                                 | Skin, Discolored, Inguinal, Right, Red     | .                             | .        | .       | .        | .        | .          | X        |
|                                 | Skin, Scab, Tail                           | .                             | .        | .       | .        | X        | .          | X        |
|                                 | Reduced Appetite, Severity Not Applicable  | .                             | .        | .       | .        | .        | X          | .        |
|                                 | Skin, Bruise, Inguinal, Right, Slight      | .                             | .        | X       | X        | .        | .          | .        |

X=Present

Sponsor Reference No. UTSW-Gray-SPG50-004

Test Facility Study No. 5550014

**Appendix 4****Individual Clinical Observations****5550014**

| 0<br>vg<br>Group 1<br>Sex: Male | Observation Type: All Types                | Day(s) Relative to Start Date |          |            |          |          |          |          |
|---------------------------------|--------------------------------------------|-------------------------------|----------|------------|----------|----------|----------|----------|
|                                 |                                            | 35<br>DE                      | 42<br>DE | 48<br>PM_S | 49<br>DE | 56<br>DE | 63<br>DE | 70<br>DE |
| 1201                            | Hunched Posture                            | .                             | .        | X          | .        | .        | .        | .        |
|                                 | Fur, Thin Cover, Dorsal Aspect Generalized | .                             | .        | .          | .        | .        | X        | X        |
|                                 | Fur, Thin Cover, Hindlimb, Left            | .                             | .        | .          | X        | X        | X        | X        |
|                                 | Fur, Thin Cover, Hindlimb, Right           | .                             | .        | .          | .        | .        | .        | .        |
|                                 | Fur, Thin Cover, Tail                      | .                             | .        | .          | X        | X        | X        | X        |
|                                 | Skin, Dry, Tail                            | X                             | X        | .          | X        | X        | X        | X        |
|                                 | Skin, Discolored, Hindlimb, Left, Red      | .                             | .        | .          | .        | .        | .        | .        |
|                                 | Skin, Discolored, Inguinal, Left, Red      | .                             | .        | .          | .        | .        | .        | .        |
|                                 | Skin, Discolored, Inguinal, Right, Red     | .                             | .        | .          | .        | .        | .        | .        |
|                                 | Skin, Scab, Tail                           | X                             | .        | .          | .        | .        | .        | .        |
|                                 | Reduced Appetite, Severity Not Applicable  | .                             | .        | .          | .        | .        | .        | .        |
|                                 | Skin, Bruise, Inguinal, Right, Slight      | .                             | .        | .          | .        | .        | .        | .        |

X=Present

Sponsor Reference No. UTSW-Gray-SPG50-004

Test Facility Study No. 5550014

**Appendix 4****Individual Clinical Observations****5550014**

| 0<br>vg<br>Group 1<br>Sex: Male | Observation Type: All Types                | Day(s) Relative to Start Date |            |          |            |            |          |          |
|---------------------------------|--------------------------------------------|-------------------------------|------------|----------|------------|------------|----------|----------|
|                                 |                                            | 77<br>DE                      | 79<br>Unsc | 84<br>DE | 86<br>Unsc | 88<br>Unsc | 91<br>DE | 94<br>DE |
| 1201                            | Hunched Posture                            | .                             | .          | .        | .          | X          | .        | .        |
|                                 | Fur, Thin Cover, Dorsal Aspect Generalized | X                             | X          | X        | X          | .          | X        | .        |
|                                 | Fur, Thin Cover, Hindlimb, Left            | X                             | X          | X        | X          | .          | X        | .        |
|                                 | Fur, Thin Cover, Hindlimb, Right           | .                             | .          | .        | .          | .          | .        | X        |
|                                 | Fur, Thin Cover, Tail                      | X                             | X          | X        | X          | .          | X        | X        |
|                                 | Skin, Dry, Tail                            | X                             | X          | X        | X          | .          | X        | X        |
|                                 | Skin, Discolored, Hindlimb, Left, Red      | .                             | .          | .        | .          | .          | .        | .        |
|                                 | Skin, Discolored, Inguinal, Left, Red      | .                             | .          | .        | .          | .          | .        | .        |
|                                 | Skin, Discolored, Inguinal, Right, Red     | .                             | .          | .        | .          | .          | .        | .        |
|                                 | Skin, Scab, Tail                           | .                             | .          | X        | X          | .          | X        | X        |
|                                 | Reduced Appetite, Severity Not Applicable  | .                             | .          | .        | .          | X          | .        | .        |
|                                 | Skin, Bruise, Inguinal, Right, Slight      | .                             | .          | .        | .          | .          | .        | .        |

X=Present

**Appendix 4****Individual Clinical Observations****5550014**

| 1.68<br>X10E14<br>vg<br>Group 3<br>Sex: Male | Observation Type: All Types                | Day(s) Relative to Start Date |          |           |         |          |          |          |
|----------------------------------------------|--------------------------------------------|-------------------------------|----------|-----------|---------|----------|----------|----------|
|                                              |                                            | -8<br>DE                      | -1<br>DE | 1<br>DuRx | 7<br>DE | 14<br>DE | 21<br>DE | 28<br>DE |
| 3201                                         | Tremors, Slight                            | .                             | .        | X         | .       | .        | .        | .        |
|                                              | Muscle Tone, Forelimb, Left, Decreased     | .                             | .        | .         | .       | .        | .        | .        |
|                                              | Muscle Tone, Hindlimb, Right, Decreased    | .                             | .        | .         | .       | .        | .        | .        |
|                                              | Hunched Posture                            | .                             | .        | .         | .       | .        | .        | .        |
|                                              | Fur, Erected                               | .                             | .        | X         | .       | .        | .        | .        |
|                                              | Fur, Staining, Abdominal, Yellow           | .                             | .        | .         | .       | .        | .        | .        |
|                                              | Fur, Thin Cover, Dorsal Aspect Generalized | .                             | .        | .         | .       | .        | .        | .        |
|                                              | Fur, Thin Cover, Hindlimb, Left            | X                             | X        | .         | X       | X        | X        | X        |
|                                              | Fur, Thin Cover, Hindlimb, Right           | X                             | X        | .         | X       | X        | X        | X        |
|                                              | Fur, Thin Cover, Lumbar                    | X                             | X        | .         | .       | .        | .        | .        |
|                                              | Fur, Thin Cover, Tail                      | .                             | .        | .         | .       | .        | .        | .        |
|                                              | Skin, Discolored, Abdominal, Yellow        | X                             | X        | .         | .       | .        | .        | .        |
|                                              | Skin, Discolored, Hindlimb, Left, Red      | .                             | X        | .         | X       | X        | .        | .        |
|                                              | Skin, Discolored, Inguinal, Left, Yellow   | X                             | X        | .         | .       | .        | .        | .        |
|                                              | Skin, Discolored, Inguinal, Right, Red     | .                             | .        | .         | X       | X        | .        | .        |
|                                              | Skin, Discolored, Inguinal, Right, Yellow  | X                             | X        | .         | .       | .        | .        | .        |
|                                              | Skin, Scab, Hindlimb, Right                | .                             | .        | .         | X       | X        | X        | X        |
|                                              | Skin, Scab, Tail                           | .                             | .        | .         | .       | X        | X        | X        |
|                                              | Reduced Appetite, Severity Not Applicable  | .                             | .        | .         | .       | .        | .        | .        |
|                                              | Material Present, Foamy, White, Severe     | .                             | .        | .         | .       | .        | .        | .        |

X=Present

**Appendix 4****Individual Clinical Observations****5550014**

| 1.68<br>X10E14<br>vg<br>Group 3<br>Sex: Male | Observation Type: All Types                | Day(s) Relative to Start Date |          |            |          |          |          |          |
|----------------------------------------------|--------------------------------------------|-------------------------------|----------|------------|----------|----------|----------|----------|
|                                              |                                            | 35<br>DE                      | 42<br>DE | 48<br>PM_S | 49<br>DE | 56<br>DE | 63<br>DE | 70<br>DE |
| 3201                                         | Tremors, Slight                            | .                             | .        | .          | .        | .        | .        | .        |
|                                              | Muscle Tone, Forelimb, Left, Decreased     | .                             | .        | .          | .        | .        | .        | .        |
|                                              | Muscle Tone, Hindlimb, Right, Decreased    | .                             | .        | .          | .        | .        | .        | .        |
|                                              | Hunched Posture                            | .                             | .        | X          | .        | .        | .        | .        |
|                                              | Fur, Erected                               | .                             | .        | X          | .        | .        | .        | .        |
|                                              | Fur, Staining, Abdominal, Yellow           | .                             | .        | .          | .        | .        | .        | .        |
|                                              | Fur, Thin Cover, Dorsal Aspect Generalized | .                             | .        | .          | X        | X        | X        | X        |
|                                              | Fur, Thin Cover, Hindlimb, Left            | X                             | X        | .          | X        | X        | X        | X        |
|                                              | Fur, Thin Cover, Hindlimb, Right           | X                             | X        | .          | X        | X        | X        | X        |
|                                              | Fur, Thin Cover, Lumbar                    | .                             | .        | .          | .        | .        | .        | .        |
|                                              | Fur, Thin Cover, Tail                      | .                             | .        | .          | X        | X        | X        | X        |
|                                              | Skin, Discolored, Abdominal, Yellow        | .                             | .        | .          | .        | .        | .        | .        |
|                                              | Skin, Discolored, Hindlimb, Left, Red      | .                             | .        | .          | .        | .        | .        | X        |
|                                              | Skin, Discolored, Inguinal, Left, Yellow   | .                             | .        | .          | .        | .        | .        | .        |
|                                              | Skin, Discolored, Inguinal, Right, Red     | .                             | .        | .          | .        | .        | .        | .        |
|                                              | Skin, Discolored, Inguinal, Right, Yellow  | .                             | .        | .          | .        | .        | .        | .        |
|                                              | Skin, Scab, Hindlimb, Right                | .                             | .        | .          | .        | .        | .        | .        |
|                                              | Skin, Scab, Tail                           | X                             | X        | .          | X        | X        | X        | X        |
|                                              | Reduced Appetite, Severity Not Applicable  | .                             | .        | .          | .        | .        | .        | .        |
|                                              | Material Present, Foamy, White, Severe     | .                             | .        | .          | .        | .        | .        | .        |

X=Present

**Appendix 4****Individual Clinical Observations****5550014**

| 1.68<br>X10E14<br>vg<br>Group 3<br>Sex: Male | Observation Type: All Types                | Day(s) Relative to Start Date |            |            |          |            |            |          |
|----------------------------------------------|--------------------------------------------|-------------------------------|------------|------------|----------|------------|------------|----------|
|                                              |                                            | 77<br>DE                      | 78<br>Unsc | 79<br>Unsc | 84<br>DE | 86<br>Unsc | 88<br>Unsc | 91<br>DE |
| 3201                                         | Tremors, Slight                            | .                             | .          | .          | .        | .          | .          | .        |
|                                              | Muscle Tone, Forelimb, Left, Decreased     | .                             | .          | X          | .        | .          | .          | .        |
|                                              | Muscle Tone, Hindlimb, Right, Decreased    | .                             | .          | .          | .        | X          | .          | .        |
|                                              | Hunched Posture                            | .                             | .          | .          | .        | .          | X          | .        |
|                                              | Fur, Erected                               | .                             | .          | .          | .        | .          | .          | .        |
|                                              | Fur, Staining, Abdominal, Yellow           | X                             | .          | X          | X        | X          | .          | X        |
|                                              | Fur, Thin Cover, Dorsal Aspect Generalized | X                             | .          | X          | X        | X          | .          | X        |
|                                              | Fur, Thin Cover, Hindlimb, Left            | X                             | .          | X          | X        | X          | .          | X        |
|                                              | Fur, Thin Cover, Hindlimb, Right           | X                             | .          | X          | X        | X          | .          | X        |
|                                              | Fur, Thin Cover, Lumbar                    | .                             | .          | .          | .        | .          | .          | .        |
|                                              | Fur, Thin Cover, Tail                      | X                             | .          | X          | X        | X          | .          | X        |
|                                              | Skin, Discolored, Abdominal, Yellow        | .                             | .          | .          | .        | .          | .          | .        |
|                                              | Skin, Discolored, Hindlimb, Left, Red      | X                             | .          | X          | X        | X          | .          | X        |
|                                              | Skin, Discolored, Inguinal, Left, Yellow   | .                             | .          | .          | .        | .          | .          | .        |
|                                              | Skin, Discolored, Inguinal, Right, Red     | .                             | .          | .          | .        | .          | .          | .        |
|                                              | Skin, Discolored, Inguinal, Right, Yellow  | .                             | .          | .          | .        | .          | .          | .        |
|                                              | Skin, Scab, Hindlimb, Right                | .                             | .          | .          | .        | .          | .          | .        |
|                                              | Skin, Scab, Tail                           | X                             | .          | X          | X        | X          | .          | X        |
|                                              | Reduced Appetite, Severity Not Applicable  | .                             | .          | .          | .        | .          | X          | .        |
|                                              | Material Present, Foamy, White, Severe     | .                             | X          | .          | .        | .          | .          | .        |

X=Present

## Appendix 4

### Individual Clinical Observations

5550014

| 1.68<br>X10E14<br>vg<br>Group 3<br>Sex: Male | Observation Type: All Types                | Day(s) Relative to Start Date |  |  |  |  |  |  |
|----------------------------------------------|--------------------------------------------|-------------------------------|--|--|--|--|--|--|
|                                              |                                            | 94<br>DE                      |  |  |  |  |  |  |
| 3201                                         | Tremors, Slight                            | .                             |  |  |  |  |  |  |
|                                              | Muscle Tone, Forelimb, Left, Decreased     | .                             |  |  |  |  |  |  |
|                                              | Muscle Tone, Hindlimb, Right, Decreased    | .                             |  |  |  |  |  |  |
|                                              | Hunched Posture                            | .                             |  |  |  |  |  |  |
|                                              | Fur, Erected                               | .                             |  |  |  |  |  |  |
|                                              | Fur, Staining, Abdominal, Yellow           | X                             |  |  |  |  |  |  |
|                                              | Fur, Thin Cover, Dorsal Aspect Generalized | .                             |  |  |  |  |  |  |
|                                              | Fur, Thin Cover, Hindlimb, Left            | .                             |  |  |  |  |  |  |
|                                              | Fur, Thin Cover, Hindlimb, Right           | X                             |  |  |  |  |  |  |
|                                              | Fur, Thin Cover, Lumbar                    | .                             |  |  |  |  |  |  |
|                                              | Fur, Thin Cover, Tail                      | X                             |  |  |  |  |  |  |
|                                              | Skin, Discolored, Abdominal, Yellow        | .                             |  |  |  |  |  |  |
|                                              | Skin, Discolored, Hindlimb, Left, Red      | X                             |  |  |  |  |  |  |
|                                              | Skin, Discolored, Inguinal, Left, Yellow   | .                             |  |  |  |  |  |  |
|                                              | Skin, Discolored, Inguinal, Right, Red     | .                             |  |  |  |  |  |  |
|                                              | Skin, Discolored, Inguinal, Right, Yellow  | .                             |  |  |  |  |  |  |
|                                              | Skin, Scab, Hindlimb, Right                | .                             |  |  |  |  |  |  |
|                                              | Skin, Scab, Tail                           | X                             |  |  |  |  |  |  |
|                                              | Reduced Appetite, Severity Not Applicable  | .                             |  |  |  |  |  |  |
|                                              | Material Present, Foamy, White, Severe     | .                             |  |  |  |  |  |  |

X=Present

Sponsor Reference No. UTSW-Gray-SPG50-004

Test Facility Study No. 5550014

**Appendix 4****Individual Clinical Observations****5550014**

| 0<br>vg<br>Group 1<br>Sex: Female | Observation Type: All Types                | Day(s) Relative to Start Date |          |           |           |         |         |          |
|-----------------------------------|--------------------------------------------|-------------------------------|----------|-----------|-----------|---------|---------|----------|
|                                   |                                            | -8<br>DE                      | -1<br>DE | 1<br>DuRx | 1<br>Unsc | 1<br>Up | 7<br>DE | 14<br>DE |
| 1701                              | Tremors, Slight                            | .                             | .        | X         | .         | .       | .       | .        |
|                                   | Fur, Erected                               | .                             | .        | X         | .         | .       | .       | .        |
|                                   | Fur, Thin Cover, Dorsal Aspect Generalized | X                             | X        | .         | X         | X       | X       | X        |
|                                   | Fur, Thin Cover, Hindlimb, Left            | X                             | X        | .         | X         | X       | X       | X        |
|                                   | Fur, Thin Cover, Hindlimb, Right           | X                             | X        | .         | X         | X       | X       | X        |
|                                   | Fur, Thin Cover, Tail                      | .                             | .        | .         | .         | .       | .       | .        |
|                                   | Skin, Dry, Tail                            | X                             | X        | .         | X         | X       | X       | X        |
|                                   | Skin, Discolored, Hindlimb, Left, Red      | .                             | .        | .         | .         | X       | X       | X        |
|                                   | Skin, Discolored, Muzzle, Red              | .                             | .        | .         | .         | .       | .       | X        |
|                                   | Sexual Skin                                | X                             | X        | .         | X         | X       | X       | X        |
|                                   | Swollen, Hindlimb, Left, Moderate, Soft    | .                             | .        | .         | .         | X       | .       | .        |
|                                   | Discharge, Color, Muzzle, Red              | .                             | .        | .         | X         | X       | .       | .        |

X=Present

Sponsor Reference No. UTSW-Gray-SPG50-004

Test Facility Study No. 5550014

**Appendix 4****Individual Clinical Observations****5550014**

| 0<br>vg<br>Group 1<br>Sex: Female | Observation Type: All Types                | Day(s) Relative to Start Date |          |          |          |          |          |          |
|-----------------------------------|--------------------------------------------|-------------------------------|----------|----------|----------|----------|----------|----------|
|                                   |                                            | 21<br>DE                      | 28<br>DE | 35<br>DE | 42<br>DE | 49<br>DE | 56<br>DE | 63<br>DE |
| 1701                              | Tremors, Slight                            | .                             | .        | .        | .        | .        | .        | .        |
|                                   | Fur, Erected                               | .                             | .        | .        | .        | .        | .        | .        |
|                                   | Fur, Thin Cover, Dorsal Aspect Generalized | X                             | X        | X        | X        | X        | X        | X        |
|                                   | Fur, Thin Cover, Hindlimb, Left            | X                             | X        | X        | X        | X        | X        | X        |
|                                   | Fur, Thin Cover, Hindlimb, Right           | X                             | X        | X        | X        | X        | X        | X        |
|                                   | Fur, Thin Cover, Tail                      | .                             | .        | .        | .        | X        | X        | X        |
|                                   | Skin, Dry, Tail                            | X                             | X        | X        | X        | X        | X        | X        |
|                                   | Skin, Discolored, Hindlimb, Left, Red      | .                             | .        | .        | .        | .        | .        | .        |
|                                   | Skin, Discolored, Muzzle, Red              | X                             | .        | .        | .        | .        | .        | .        |
|                                   | Sexual Skin                                | .                             | .        | .        | .        | .        | X        | X        |
|                                   | Swollen, Hindlimb, Left, Moderate, Soft    | .                             | .        | .        | .        | .        | .        | .        |
|                                   | Discharge, Color, Muzzle, Red              | .                             | .        | .        | .        | .        | .        | .        |

X=Present

**Appendix 4****Individual Clinical Observations****5550014**

| 0<br>vg<br>Group 1<br>Sex: Female | Observation Type: All Types                | Day(s) Relative to Start Date |          |            |          |            |          |          |
|-----------------------------------|--------------------------------------------|-------------------------------|----------|------------|----------|------------|----------|----------|
|                                   |                                            | 70<br>DE                      | 77<br>DE | 79<br>Unsc | 84<br>DE | 86<br>Unsc | 91<br>DE | 94<br>DE |
| 1701                              | Tremors, Slight                            | .                             | .        | .          | .        | .          | .        | .        |
|                                   | Fur, Erected                               | .                             | .        | .          | .        | .          | .        | .        |
|                                   | Fur, Thin Cover, Dorsal Aspect Generalized | X                             | X        | X          | X        | X          | X        | .        |
|                                   | Fur, Thin Cover, Hindlimb, Left            | X                             | X        | X          | X        | X          | X        | .        |
|                                   | Fur, Thin Cover, Hindlimb, Right           | X                             | X        | X          | X        | X          | X        | X        |
|                                   | Fur, Thin Cover, Tail                      | X                             | X        | X          | X        | X          | X        | X        |
|                                   | Skin, Dry, Tail                            | X                             | X        | X          | X        | X          | X        | X        |
|                                   | Skin, Discolored, Hindlimb, Left, Red      | X                             | X        | X          | X        | X          | X        | X        |
|                                   | Skin, Discolored, Muzzle, Red              | .                             | .        | .          | .        | .          | .        | .        |
|                                   | Sexual Skin                                | X                             | X        | X          | X        | X          | X        | .        |
|                                   | Swollen, Hindlimb, Left, Moderate, Soft    | .                             | .        | .          | .        | .          | .        | .        |
|                                   | Discharge, Color, Muzzle, Red              | .                             | .        | .          | .        | .          | .        | .        |

X=Present

**Appendix 4****Individual Clinical Observations****5550014**

| 8.4<br>X10E13<br>vg<br>Group 2<br>Sex: Female | Observation Type: All Types                            | Day(s) Relative to Start Date |          |          |         |         |          |          |
|-----------------------------------------------|--------------------------------------------------------|-------------------------------|----------|----------|---------|---------|----------|----------|
|                                               |                                                        | -10<br>AM_S                   | -8<br>DE | -1<br>DE | 1<br>Up | 7<br>DE | 14<br>DE | 21<br>DE |
| 2701                                          | Muscle Tone, Forelimb, Left, Decreased                 | .                             | .        | .        | .       | .       | .        | .        |
|                                               | Muscle Tone, Hindlimb, Right, Decreased                | .                             | .        | .        | .       | .       | .        | .        |
|                                               | Fur, Thin Cover, Cranium                               | .                             | .        | .        | .       | .       | .        | .        |
|                                               | Fur, Thin Cover, Dorsal Aspect Generalized             | .                             | X        | X        | .       | X       | X        | X        |
|                                               | Fur, Thin Cover, Forelimb, Left                        | .                             | X        | X        | .       | X       | X        | X        |
|                                               | Fur, Thin Cover, Forelimb, Right                       | .                             | X        | X        | .       | X       | X        | X        |
|                                               | Fur, Thin Cover, Hindlimb, Left                        | .                             | X        | X        | .       | X       | X        | X        |
|                                               | Fur, Thin Cover, Hindlimb, Right                       | .                             | X        | X        | .       | X       | X        | X        |
|                                               | Fur, Thin Cover, Tail                                  | .                             | .        | .        | .       | .       | .        | .        |
|                                               | Skin, Dry, Tail                                        | .                             | X        | X        | .       | X       | X        | X        |
|                                               | Skin, Discolored, Cranium, Red                         | .                             | .        | X        | .       | .       | .        | .        |
|                                               | Skin, Discolored, Periorbital, Left, Purple, & Red     | .                             | X        | .        | .       | .       | .        | .        |
|                                               | Skin, Scab, Abdominal                                  | .                             | X        | X        | .       | X       | X        | X        |
|                                               | Skin, Scab, Hindlimb, Right                            | .                             | X        | X        | .       | .       | .        | .        |
|                                               | Skin, Scab, Lumbar                                     | .                             | X        | X        | .       | X       | X        | X        |
|                                               | Skin, Scab, Tail                                       | .                             | .        | .        | .       | X       | X        | X        |
|                                               | Sexual Skin                                            | .                             | X        | X        | .       | X       | X        | X        |
|                                               | Thin                                                   | .                             | .        | .        | .       | .       | .        | .        |
|                                               | Feces, Abnormal Consistency, Soft, Slight Group Housed | .                             | .        | .        | .       | .       | .        | .        |
|                                               | Reduced Appetite, Severity Not Applicable              | .                             | .        | .        | .       | .       | .        | .        |
|                                               | Material Present, Dry, Red, Moderate Group Housed      | .                             | .        | .        | .       | .       | .        | .        |
| 2702 !                                        | Fur, Thin Cover, Dorsal Aspect Generalized             | .                             | .        | .        | .       | .       | .        | .        |
|                                               | Fur, Thin Cover, Hindlimb, Left                        | .                             | .        | .        | .       | .       | .        | .        |
|                                               | Fur, Thin Cover, Tail                                  | .                             | .        | .        | .       | .       | .        | .        |

!=Result comment recorded against 1 or more clinical observations. X=Present

**Appendix 4****Individual Clinical Observations****5550014**

| 8.4<br>X10E13<br>vg<br>Group 2<br>Sex: Female | Observation Type: All Types                            | Day(s) Relative to Start Date |          |          |         |         |          |          |
|-----------------------------------------------|--------------------------------------------------------|-------------------------------|----------|----------|---------|---------|----------|----------|
|                                               |                                                        | -10<br>AM_S                   | -8<br>DE | -1<br>DE | 1<br>Up | 7<br>DE | 14<br>DE | 21<br>DE |
| 2702 !                                        | Skin, Lesion, Hindlimb, Left, Moderate                 | .                             | .        | .        | .       | .       | .        | .        |
|                                               | Skin, Dry, Tail                                        | .                             | .        | .        | .       | .       | .        | .        |
|                                               | Skin, Discolored, Hindlimb, Left, Red                  | .                             | .        | .        | X       | X       | X        | .        |
|                                               | Skin, Discolored, Inguinal, Left, Red                  | .                             | X        | X        | .       | .       | X        | .        |
|                                               | Skin, Discolored, Muzzle, Red                          | .                             | .        | .        | .       | X       | X        | X        |
|                                               | Skin, Scab, Hindlimb, Left                             | .                             | .        | .        | .       | .       | .        | .        |
|                                               | Skin, Scab, Tail                                       | .                             | .        | .        | .       | .       | .        | .        |
|                                               | Sexual Skin                                            | .                             | X        | X        | X       | X       | X        | X        |
|                                               | Swollen, Hindlimb, Left, Moderate, Soft                | .                             | .        | .        | X       | .       | .        | .        |
|                                               | Swollen, Hindlimb, Left, Slight, Soft                  | .                             | .        | .        | .       | .       | .        | .        |
|                                               | Feces, Abnormal Consistency, Soft, Slight Group Housed | .                             | .        | .        | .       | .       | .        | .        |
|                                               | Discharge, Color, Site Not Recorded, White             | .                             | .        | .        | .       | .       | .        | .        |
|                                               | Reduced Appetite, Severity Not Applicable              | X                             | .        | .        | .       | .       | .        | .        |
|                                               | Material Present, Dry, Red, Moderate Group Housed      | .                             | .        | .        | .       | .       | .        | .        |

!=Result comment recorded against 1 or more clinical observations. X=Present

**Appendix 4****Individual Clinical Observations****5550014**

| 8.4<br>X10E13<br>vg<br>Group 2<br>Sex: Female | Observation Type: All Types                            | Day(s) Relative to Start Date |          |            |            |          |          |          |
|-----------------------------------------------|--------------------------------------------------------|-------------------------------|----------|------------|------------|----------|----------|----------|
|                                               |                                                        | 25<br>AM_S                    | 28<br>DE | 28<br>PM_S | 30<br>Unsc | 35<br>DE | 42<br>DE | 49<br>DE |
| 2701                                          | Muscle Tone, Forelimb, Left, Decreased                 | .                             | .        | .          | .          | .        | .        | .        |
|                                               | Muscle Tone, Hindlimb, Right, Decreased                | .                             | .        | .          | .          | .        | .        | .        |
|                                               | Fur, Thin Cover, Cranium                               | .                             | .        | .          | .          | .        | .        | .        |
|                                               | Fur, Thin Cover, Dorsal Aspect Generalized             | .                             | X        | .          | .          | X        | X        | X        |
|                                               | Fur, Thin Cover, Forelimb, Left                        | .                             | X        | .          | .          | X        | X        | X        |
|                                               | Fur, Thin Cover, Forelimb, Right                       | .                             | X        | .          | .          | X        | X        | X        |
|                                               | Fur, Thin Cover, Hindlimb, Left                        | .                             | X        | .          | .          | X        | X        | X        |
|                                               | Fur, Thin Cover, Hindlimb, Right                       | .                             | X        | .          | .          | X        | X        | X        |
|                                               | Fur, Thin Cover, Tail                                  | .                             | .        | .          | .          | .        | .        | X        |
|                                               | Skin, Dry, Tail                                        | .                             | X        | .          | .          | X        | X        | X        |
|                                               | Skin, Discolored, Cranium, Red                         | .                             | .        | .          | .          | .        | .        | .        |
|                                               | Skin, Discolored, Periorbital, Left, Purple, & Red     | .                             | .        | .          | .          | .        | .        | .        |
|                                               | Skin, Scab, Abdominal                                  | .                             | .        | .          | .          | .        | .        | .        |
|                                               | Skin, Scab, Hindlimb, Right                            | .                             | .        | .          | .          | .        | .        | .        |
|                                               | Skin, Scab, Lumbar                                     | .                             | X        | .          | .          | X        | .        | .        |
|                                               | Skin, Scab, Tail                                       | .                             | X        | .          | .          | X        | .        | .        |
|                                               | Sexual Skin                                            | .                             | X        | .          | .          | X        | X        | X        |
|                                               | Thin                                                   | .                             | .        | .          | .          | .        | .        | .        |
|                                               | Feces, Abnormal Consistency, Soft, Slight Group Housed | .                             | .        | X          | .          | .        | .        | .        |
|                                               | Reduced Appetite, Severity Not Applicable              | X                             | .        | .          | .          | .        | .        | .        |
|                                               | Material Present, Dry, Red, Moderate Group Housed      | .                             | .        | .          | .          | .        | .        | .        |
| 2702                                          | Fur, Thin Cover, Dorsal Aspect Generalized             | .                             | .        | .          | .          | .        | .        | X        |
|                                               | Fur, Thin Cover, Hindlimb, Left                        | .                             | .        | .          | .          | .        | .        | .        |
|                                               | Fur, Thin Cover, Tail                                  | .                             | .        | .          | .          | .        | .        | X        |

X=Present

**Appendix 4****Individual Clinical Observations****5550014**

| 8.4<br>X10E13<br>vg<br>Group 2<br>Sex: Female | Observation Type: All Types                            | Day(s) Relative to Start Date |          |            |            |          |          |          |
|-----------------------------------------------|--------------------------------------------------------|-------------------------------|----------|------------|------------|----------|----------|----------|
|                                               |                                                        | 25<br>AM_S                    | 28<br>DE | 28<br>PM_S | 30<br>Unsc | 35<br>DE | 42<br>DE | 49<br>DE |
| 2702                                          | Skin, Lesion, Hindlimb, Left, Moderate                 | .                             | .        | X          | .          | .        | .        | .        |
|                                               | Skin, Dry, Tail                                        | .                             | .        | .          | .          | .        | .        | .        |
|                                               | Skin, Discolored, Hindlimb, Left, Red                  | .                             | X        | .          | X          | X        | X        | X        |
|                                               | Skin, Discolored, Inguinal, Left, Red                  | .                             | .        | .          | .          | .        | .        | .        |
|                                               | Skin, Discolored, Muzzle, Red                          | .                             | .        | .          | .          | .        | .        | .        |
|                                               | Skin, Scab, Hindlimb, Left                             | .                             | .        | .          | .          | X        | .        | .        |
|                                               | Skin, Scab, Tail                                       | .                             | .        | .          | .          | .        | .        | .        |
|                                               | Sexual Skin                                            | .                             | X        | .          | X          | X        | X        | X        |
|                                               | Swollen, Hindlimb, Left, Moderate, Soft                | .                             | .        | .          | X          | X        | .        | .        |
|                                               | Swollen, Hindlimb, Left, Slight, Soft                  | .                             | X        | .          | .          | .        | .        | .        |
|                                               | Feces, Abnormal Consistency, Soft, Slight Group Housed | .                             | .        | X          | .          | .        | .        | .        |
|                                               | Discharge, Color, Site Not Recorded, White             | .                             | X        | .          | X          | .        | .        | .        |
|                                               | Reduced Appetite, Severity Not Applicable              | X                             | .        | .          | .          | .        | .        | .        |
|                                               | Material Present, Dry, Red, Moderate Group Housed      | .                             | .        | .          | .          | .        | .        | .        |

X=Present

**Appendix 4****Individual Clinical Observations****5550014**

| 8.4<br>X10E13<br>vg<br>Group 2<br>Sex: Female | Observation Type: All Types                            | Day(s) Relative to Start Date |          |            |          |          |            |          |
|-----------------------------------------------|--------------------------------------------------------|-------------------------------|----------|------------|----------|----------|------------|----------|
|                                               |                                                        | 56<br>DE                      | 63<br>DE | 67<br>AM_S | 70<br>DE | 77<br>DE | 79<br>Unsc | 84<br>DE |
| 2701                                          | Muscle Tone, Forelimb, Left, Decreased                 | .                             | .        | .          | .        | .        | .          | .        |
|                                               | Muscle Tone, Hindlimb, Right, Decreased                | .                             | .        | .          | .        | .        | .          | .        |
|                                               | Fur, Thin Cover, Cranium                               | .                             | X        | .          | X        | X        | X          | X        |
|                                               | Fur, Thin Cover, Dorsal Aspect Generalized             | X                             | X        | .          | X        | X        | X          | X        |
|                                               | Fur, Thin Cover, Forelimb, Left                        | X                             | X        | .          | X        | X        | X          | X        |
|                                               | Fur, Thin Cover, Forelimb, Right                       | X                             | X        | .          | X        | X        | X          | X        |
|                                               | Fur, Thin Cover, Hindlimb, Left                        | X                             | X        | .          | X        | X        | X          | X        |
|                                               | Fur, Thin Cover, Hindlimb, Right                       | X                             | X        | .          | X        | X        | X          | X        |
|                                               | Fur, Thin Cover, Tail                                  | X                             | X        | .          | X        | X        | X          | X        |
|                                               | Skin, Dry, Tail                                        | X                             | X        | .          | X        | X        | X          | X        |
|                                               | Skin, Discolored, Cranium, Red                         | .                             | .        | .          | .        | .        | .          | .        |
|                                               | Skin, Discolored, Periorbital, Left, Purple, & Red     | .                             | .        | .          | .        | .        | .          | .        |
|                                               | Skin, Scab, Abdominal                                  | .                             | .        | .          | .        | .        | .          | .        |
|                                               | Skin, Scab, Hindlimb, Right                            | .                             | .        | .          | .        | .        | .          | .        |
|                                               | Skin, Scab, Lumbar                                     | .                             | .        | .          | .        | .        | .          | .        |
|                                               | Skin, Scab, Tail                                       | X                             | X        | .          | X        | X        | X          | X        |
|                                               | Sexual Skin                                            | X                             | X        | .          | X        | X        | X          | X        |
|                                               | Thin                                                   | .                             | .        | .          | .        | .        | X          | X        |
|                                               | Feces, Abnormal Consistency, Soft, Slight Group Housed | .                             | .        | .          | .        | .        | .          | .        |
|                                               | Reduced Appetite, Severity Not Applicable              | .                             | .        | .          | .        | .        | .          | .        |
|                                               | Material Present, Dry, Red, Moderate Group Housed      | .                             | .        | X          | .        | .        | .          | .        |
| 2702                                          | Fur, Thin Cover, Dorsal Aspect Generalized             | X                             | X        | .          | X        | X        | X          | X        |
|                                               | Fur, Thin Cover, Hindlimb, Left                        | .                             | .        | .          | X        | X        | X          | X        |
|                                               | Fur, Thin Cover, Tail                                  | X                             | X        | .          | X        | X        | X          | X        |

X=Present

**Appendix 4****Individual Clinical Observations****5550014**

| 8.4<br>X10E13<br>vg<br>Group 2<br>Sex: Female | Observation Type: All Types                            | Day(s) Relative to Start Date |          |            |          |          |            |          |
|-----------------------------------------------|--------------------------------------------------------|-------------------------------|----------|------------|----------|----------|------------|----------|
|                                               |                                                        | 56<br>DE                      | 63<br>DE | 67<br>AM_S | 70<br>DE | 77<br>DE | 79<br>Unsc | 84<br>DE |
| 2702                                          | Skin, Lesion, Hindlimb, Left, Moderate                 | .                             | .        | .          | .        | .        | .          | .        |
|                                               | Skin, Dry, Tail                                        | X                             | X        | .          | X        | X        | X          | X        |
|                                               | Skin, Discolored, Hindlimb, Left, Red                  | X                             | X        | .          | X        | X        | X          | X        |
|                                               | Skin, Discolored, Inguinal, Left, Red                  | .                             | .        | .          | .        | .        | .          | .        |
|                                               | Skin, Discolored, Muzzle, Red                          | .                             | .        | .          | .        | .        | .          | .        |
|                                               | Skin, Scab, Hindlimb, Left                             | .                             | .        | .          | .        | .        | .          | .        |
|                                               | Skin, Scab, Tail                                       | .                             | .        | .          | .        | .        | .          | X        |
|                                               | Sexual Skin                                            | X                             | X        | .          | X        | X        | X          | X        |
|                                               | Swollen, Hindlimb, Left, Moderate, Soft                | .                             | .        | .          | .        | .        | .          | .        |
|                                               | Swollen, Hindlimb, Left, Slight, Soft                  | .                             | .        | .          | .        | .        | .          | .        |
|                                               | Feces, Abnormal Consistency, Soft, Slight Group Housed | .                             | .        | .          | .        | .        | .          | .        |
|                                               | Discharge, Color, Site Not Recorded, White             | .                             | .        | .          | .        | .        | .          | .        |
|                                               | Reduced Appetite, Severity Not Applicable              | .                             | .        | .          | .        | .        | .          | .        |
|                                               | Material Present, Dry, Red, Moderate Group Housed      | .                             | .        | X          | .        | .        | .          | .        |

X=Present

**Appendix 4****Individual Clinical Observations****5550014**

| 8.4<br>X10E13<br>vg<br>Group 2<br>Sex: Female | Observation Type: All Types                            | Day(s) Relative to Start Date |          |          |  |  |  |  |
|-----------------------------------------------|--------------------------------------------------------|-------------------------------|----------|----------|--|--|--|--|
|                                               |                                                        | 86<br>Unsc                    | 91<br>DE | 94<br>DE |  |  |  |  |
| 2701                                          | Muscle Tone, Forelimb, Left, Decreased                 | X                             | X        | .        |  |  |  |  |
|                                               | Muscle Tone, Hindlimb, Right, Decreased                | X                             | X        | .        |  |  |  |  |
| 2702                                          | Fur, Thin Cover, Cranium                               | X                             | X        | .        |  |  |  |  |
|                                               | Fur, Thin Cover, Dorsal Aspect Generalized             | X                             | X        | .        |  |  |  |  |
|                                               | Fur, Thin Cover, Forelimb, Left                        | X                             | X        | .        |  |  |  |  |
|                                               | Fur, Thin Cover, Forelimb, Right                       | X                             | X        | .        |  |  |  |  |
|                                               | Fur, Thin Cover, Hindlimb, Left                        | X                             | X        | .        |  |  |  |  |
|                                               | Fur, Thin Cover, Hindlimb, Right                       | X                             | X        | X        |  |  |  |  |
|                                               | Fur, Thin Cover, Tail                                  | X                             | X        | X        |  |  |  |  |
|                                               | Skin, Dry, Tail                                        | X                             | X        | X        |  |  |  |  |
|                                               | Skin, Discolored, Cranium, Red                         | .                             | .        | .        |  |  |  |  |
|                                               | Skin, Discolored, Periorbital, Left, Purple, & Red     | .                             | .        | .        |  |  |  |  |
|                                               | Skin, Scab, Abdominal                                  | .                             | .        | .        |  |  |  |  |
|                                               | Skin, Scab, Hindlimb, Right                            | .                             | .        | .        |  |  |  |  |
|                                               | Skin, Scab, Lumbar                                     | .                             | .        | .        |  |  |  |  |
|                                               | Skin, Scab, Tail                                       | X                             | X        | X        |  |  |  |  |
|                                               | Sexual Skin                                            | X                             | X        | .        |  |  |  |  |
|                                               | Thin                                                   | X                             | X        | X        |  |  |  |  |
|                                               | Feces, Abnormal Consistency, Soft, Slight Group Housed | .                             | .        | .        |  |  |  |  |
|                                               | Reduced Appetite, Severity Not Applicable              | .                             | .        | .        |  |  |  |  |
|                                               | Material Present, Dry, Red, Moderate Group Housed      | .                             | .        | .        |  |  |  |  |
|                                               | Fur, Thin Cover, Dorsal Aspect Generalized             | X                             | X        | .        |  |  |  |  |
|                                               | Fur, Thin Cover, Hindlimb, Left                        | X                             | X        | .        |  |  |  |  |
|                                               | Fur, Thin Cover, Tail                                  | X                             | X        | X        |  |  |  |  |

X=Present

**Appendix 4****Individual Clinical Observations****5550014**

| 8.4<br>X10E13<br>vg<br>Group 2<br>Sex: Female | Observation Type: All Types                            | Day(s) Relative to Start Date |          |          |  |  |  |  |
|-----------------------------------------------|--------------------------------------------------------|-------------------------------|----------|----------|--|--|--|--|
|                                               |                                                        | 86<br>Unsc                    | 91<br>DE | 94<br>DE |  |  |  |  |
| 2702                                          | Skin, Lesion, Hindlimb, Left, Moderate                 | .                             | .        | .        |  |  |  |  |
|                                               | Skin, Dry, Tail                                        | X                             | X        | X        |  |  |  |  |
|                                               | Skin, Discolored, Hindlimb, Left, Red                  | X                             | X        | X        |  |  |  |  |
|                                               | Skin, Discolored, Inguinal, Left, Red                  | .                             | .        | .        |  |  |  |  |
|                                               | Skin, Discolored, Muzzle, Red                          | .                             | .        | .        |  |  |  |  |
|                                               | Skin, Scab, Hindlimb, Left                             | .                             | .        | .        |  |  |  |  |
|                                               | Skin, Scab, Tail                                       | X                             | X        | .        |  |  |  |  |
|                                               | Sexual Skin                                            | X                             | X        | .        |  |  |  |  |
|                                               | Swollen, Hindlimb, Left, Moderate, Soft                | .                             | .        | .        |  |  |  |  |
|                                               | Swollen, Hindlimb, Left, Slight, Soft                  | .                             | .        | .        |  |  |  |  |
|                                               | Feces, Abnormal Consistency, Soft, Slight Group Housed | .                             | .        | .        |  |  |  |  |
|                                               | Discharge, Color, Site Not Recorded, White             | .                             | .        | .        |  |  |  |  |
|                                               | Reduced Appetite, Severity Not Applicable              | .                             | .        | .        |  |  |  |  |
|                                               | Material Present, Dry, Red, Moderate Group Housed      | .                             | .        | .        |  |  |  |  |

X=Present

Sponsor Reference No. UTSW-Gray-SPG50-004

Test Facility Study No. 5550014

**Appendix 4****Individual Clinical Observations****5550014**Comment Information

| <u>Group</u>    | <u>Sex</u> | <u>Animal</u> | <u>Day</u> | <u>Observation Type</u> | <u>Comment</u>   |
|-----------------|------------|---------------|------------|-------------------------|------------------|
| 2: 8.4X10E13 vg | Female     | 2702          | 1 (Up)     | All Types               | SWOLLEN AFTER IM |
| 2: 8.4X10E13 vg | Female     | 2702          | 7 (DE)     | All Types               | SWOLLEN AFTER IM |

**Appendix 4****Individual Clinical Observations****5550014**

| 1.68<br>X10E14<br>vg<br>Group 3<br>Sex: Female | Observation Type: All Types                  | Day(s) Relative to Start Date |          |          |           |          |         |         |
|------------------------------------------------|----------------------------------------------|-------------------------------|----------|----------|-----------|----------|---------|---------|
|                                                |                                              | -11<br>Upr                    | -8<br>DE | -1<br>DE | 1<br>DuRx | 1<br>UDu | 1<br>Up | 7<br>DE |
| 3701 !                                         | Retching                                     | X                             | .        | .        | .         | .        | .       | .       |
|                                                | Tremors (Localized), Hindlimb, Right, Slight | .                             | .        | .        | .         | .        | X       | .       |
|                                                | Tremors, Moderate                            | .                             | .        | .        | X         | .        | .       | .       |
|                                                | Tremors, Slight                              | X                             | .        | .        | .         | X        | .       | .       |
|                                                | Muscle Tone, Hindlimb, Left, Increased       | .                             | .        | .        | .         | .        | X       | .       |
|                                                | Muscle Tone, Hindlimb, Right, Increased      | .                             | .        | .        | .         | .        | X       | .       |
|                                                | Muscle Tone, Site Not Recorded, Increased    | .                             | .        | .        | .         | .        | X       | .       |
|                                                | Hunched Posture                              | .                             | .        | .        | .         | .        | .       | .       |
|                                                | Fur, Erected                                 | .                             | .        | .        | X         | .        | .       | .       |
|                                                | Fur, Thin Cover, Dorsal Aspect Generalized   | .                             | .        | .        | .         | .        | .       | .       |
|                                                | Fur, Thin Cover, Hindlimb, Left              | .                             | .        | .        | .         | .        | .       | .       |
|                                                | Fur, Thin Cover, Hindlimb, Right             | .                             | .        | .        | .         | .        | .       | X       |
|                                                | Fur, Thin Cover, Tail                        | .                             | .        | .        | .         | .        | .       | .       |
|                                                | Skin, Dry, Tail                              | .                             | X        | X        | .         | .        | .       | X       |
|                                                | Skin, Discolored, Hindlimb, Left, Red        | .                             | .        | .        | .         | .        | .       | .       |
|                                                | Skin, Discolored, Periorbital, Left, Red     | .                             | .        | X        | .         | .        | .       | X       |
|                                                | Skin, Scab, Hindlimb, Left                   | .                             | .        | .        | .         | .        | .       | .       |
|                                                | Skin, Scab, Tail                             | .                             | .        | .        | .         | .        | .       | X       |
|                                                | Sexual Skin                                  | .                             | X        | X        | .         | .        | .       | X       |
|                                                | Swollen, Hindlimb, Left, Slight, Firm        | .                             | .        | .        | .         | .        | .       | .       |
|                                                | Sneezing                                     | .                             | .        | .        | .         | .        | .       | .       |
|                                                | Activity Decreased                           | .                             | .        | .        | .         | .        | .       | .       |
|                                                | Skin, Bruise, Inguinal, Left, Slight         | .                             | .        | .        | .         | .        | .       | X       |

!=Result comment recorded against 1 or more clinical observations. X=Present

**Appendix 4****Individual Clinical Observations****5550014**

| 1.68<br>X10E14<br>vg<br>Group 3<br>Sex: Female | Observation Type: All Types                  | Day(s) Relative to Start Date |          |          |          |          |          |          |
|------------------------------------------------|----------------------------------------------|-------------------------------|----------|----------|----------|----------|----------|----------|
|                                                |                                              | 14<br>DE                      | 21<br>DE | 28<br>DE | 35<br>DE | 42<br>DE | 49<br>DE | 56<br>DE |
| 3701                                           | Retching                                     | .                             | .        | .        | .        | .        | .        | .        |
|                                                | Tremors (Localized), Hindlimb, Right, Slight | .                             | .        | .        | .        | .        | .        | .        |
|                                                | Tremors, Moderate                            | .                             | .        | .        | .        | .        | .        | .        |
|                                                | Tremors, Slight                              | .                             | .        | .        | .        | .        | .        | .        |
|                                                | Muscle Tone, Hindlimb, Left, Increased       | .                             | .        | .        | .        | .        | .        | .        |
|                                                | Muscle Tone, Hindlimb, Right, Increased      | .                             | .        | .        | .        | .        | .        | .        |
|                                                | Muscle Tone, Site Not Recorded, Increased    | .                             | .        | .        | .        | .        | .        | .        |
|                                                | Hunched Posture                              | .                             | .        | .        | .        | .        | .        | .        |
|                                                | Fur, Erected                                 | .                             | .        | .        | .        | .        | .        | .        |
|                                                | Fur, Thin Cover, Dorsal Aspect Generalized   | .                             | .        | .        | .        | .        | .        | X        |
|                                                | Fur, Thin Cover, Hindlimb, Left              | .                             | .        | .        | .        | .        | X        | X        |
|                                                | Fur, Thin Cover, Hindlimb, Right             | X                             | X        | X        | X        | X        | X        | X        |
|                                                | Fur, Thin Cover, Tail                        | .                             | .        | .        | .        | .        | X        | X        |
|                                                | Skin, Dry, Tail                              | X                             | X        | X        | X        | X        | X        | X        |
|                                                | Skin, Discolored, Hindlimb, Left, Red        | .                             | .        | .        | .        | .        | .        | .        |
|                                                | Skin, Discolored, Periorbital, Left, Red     | X                             | .        | .        | .        | .        | .        | .        |
|                                                | Skin, Scab, Hindlimb, Left                   | .                             | .        | .        | .        | .        | .        | .        |
|                                                | Skin, Scab, Tail                             | X                             | X        | X        | X        | .        | .        | .        |
|                                                | Sexual Skin                                  | X                             | X        | X        | X        | X        | X        | X        |
|                                                | Swollen, Hindlimb, Left, Slight, Firm        | .                             | .        | .        | .        | .        | .        | .        |
|                                                | Sneezing                                     | .                             | .        | .        | .        | .        | .        | .        |
|                                                | Activity Decreased                           | .                             | .        | .        | .        | .        | .        | .        |
|                                                | Skin, Bruise, Inguinal, Left, Slight         | X                             | .        | .        | .        | .        | .        | .        |

X=Present

**Appendix 4****Individual Clinical Observations****5550014**

| 1.68<br>X10E14<br>vg<br>Group 3<br>Sex: Female | Observation Type: All Types                  | Day(s) Relative to Start Date |            |          |          |          |            |          |
|------------------------------------------------|----------------------------------------------|-------------------------------|------------|----------|----------|----------|------------|----------|
|                                                |                                              | 57<br>AM_S                    | 61<br>AM_S | 63<br>DE | 70<br>DE | 77<br>DE | 79<br>Unsc | 84<br>DE |
| 3701                                           | Retching                                     | .                             | .          | .        | .        | .        | .          | .        |
|                                                | Tremors (Localized), Hindlimb, Right, Slight | X                             | X          | .        | .        | .        | .          | .        |
|                                                | Tremors, Moderate                            | .                             | .          | .        | .        | .        | .          | .        |
|                                                | Tremors, Slight                              | .                             | .          | .        | .        | .        | .          | .        |
|                                                | Muscle Tone, Hindlimb, Left, Increased       | .                             | .          | .        | .        | .        | .          | .        |
|                                                | Muscle Tone, Hindlimb, Right, Increased      | .                             | .          | .        | .        | .        | .          | .        |
|                                                | Muscle Tone, Site Not Recorded, Increased    | .                             | .          | .        | .        | .        | .          | .        |
|                                                | Hunched Posture                              | X                             | X          | .        | .        | .        | .          | .        |
|                                                | Fur, Erected                                 | .                             | .          | .        | .        | .        | .          | .        |
|                                                | Fur, Thin Cover, Dorsal Aspect Generalized   | .                             | .          | X        | X        | X        | X          | X        |
|                                                | Fur, Thin Cover, Hindlimb, Left              | .                             | .          | X        | X        | X        | X          | X        |
|                                                | Fur, Thin Cover, Hindlimb, Right             | .                             | .          | X        | X        | X        | X          | X        |
|                                                | Fur, Thin Cover, Tail                        | .                             | .          | X        | X        | X        | X          | X        |
|                                                | Skin, Dry, Tail                              | .                             | .          | X        | X        | X        | X          | X        |
|                                                | Skin, Discolored, Hindlimb, Left, Red        | .                             | .          | .        | .        | .        | .          | .        |
|                                                | Skin, Discolored, Periorbital, Left, Red     | .                             | .          | .        | .        | .        | .          | .        |
|                                                | Skin, Scab, Hindlimb, Left                   | .                             | .          | .        | .        | .        | .          | X        |
|                                                | Skin, Scab, Tail                             | .                             | .          | .        | .        | .        | .          | X        |
|                                                | Sexual Skin                                  | .                             | .          | X        | X        | X        | X          | X        |
|                                                | Swollen, Hindlimb, Left, Slight, Firm        | .                             | .          | .        | .        | .        | .          | .        |
|                                                | Sneezing                                     | .                             | X          | .        | .        | .        | .          | .        |
|                                                | Activity Decreased                           | X                             | X          | .        | .        | .        | .          | .        |
|                                                | Skin, Bruise, Inguinal, Left, Slight         | .                             | .          | .        | .        | .        | .          | .        |

X=Present

**Appendix 4****Individual Clinical Observations****5550014**

| 1.68<br>X10E14<br>vg<br>Group 3<br>Sex: Female | Observation Type: All Types                  | Day(s) Relative to Start Date |            |          |          |  |  |  |
|------------------------------------------------|----------------------------------------------|-------------------------------|------------|----------|----------|--|--|--|
|                                                |                                              | 86<br>Unsc                    | 89<br>Unsc | 91<br>DE | 94<br>DE |  |  |  |
| 3701                                           | Retching                                     | .                             | .          | .        | .        |  |  |  |
|                                                | Tremors (Localized), Hindlimb, Right, Slight | .                             | .          | .        | .        |  |  |  |
|                                                | Tremors, Moderate                            | .                             | .          | .        | .        |  |  |  |
|                                                | Tremors, Slight                              | .                             | .          | .        | .        |  |  |  |
|                                                | Muscle Tone, Hindlimb, Left, Increased       | .                             | .          | .        | .        |  |  |  |
|                                                | Muscle Tone, Hindlimb, Right, Increased      | .                             | .          | .        | .        |  |  |  |
|                                                | Muscle Tone, Site Not Recorded, Increased    | .                             | .          | .        | .        |  |  |  |
|                                                | Hunched Posture                              | .                             | .          | .        | .        |  |  |  |
|                                                | Fur, Erected                                 | .                             | .          | .        | .        |  |  |  |
|                                                | Fur, Thin Cover, Dorsal Aspect Generalized   | X                             | X          | X        | .        |  |  |  |
|                                                | Fur, Thin Cover, Hindlimb, Left              | X                             | X          | X        | .        |  |  |  |
|                                                | Fur, Thin Cover, Hindlimb, Right             | X                             | X          | X        | X        |  |  |  |
|                                                | Fur, Thin Cover, Tail                        | X                             | X          | X        | X        |  |  |  |
|                                                | Skin, Dry, Tail                              | X                             | X          | X        | X        |  |  |  |
|                                                | Skin, Discolored, Hindlimb, Left, Red        | .                             | X          | X        | X        |  |  |  |
|                                                | Skin, Discolored, Periorbital, Left, Red     | .                             | .          | .        | .        |  |  |  |
|                                                | Skin, Scab, Hindlimb, Left                   | X                             | X          | X        | .        |  |  |  |
|                                                | Skin, Scab, Tail                             | X                             | X          | X        | X        |  |  |  |
|                                                | Sexual Skin                                  | X                             | X          | X        | X        |  |  |  |
|                                                | Swollen, Hindlimb, Left, Slight, Firm        | .                             | X          | .        | .        |  |  |  |
|                                                | Sneezing                                     | .                             | .          | .        | .        |  |  |  |
|                                                | Activity Decreased                           | .                             | .          | .        | .        |  |  |  |
|                                                | Skin, Bruise, Inguinal, Left, Slight         | .                             | .          | .        | .        |  |  |  |

X=Present

Sponsor Reference No. UTSW-Gray-SPG50-004

Test Facility Study No. 5550014

**Appendix 4****Individual Clinical Observations****5550014**Comment Information

| <u>Group</u>     | <u>Sex</u> | <u>Animal</u> | <u>Day</u> | <u>Observation Type</u> | <u>Comment</u>             |
|------------------|------------|---------------|------------|-------------------------|----------------------------|
| 3: 1.68X10E14 vg | Female     | 3701          | 1 (Up)     | All Types               | MUSCLE TONE INCREASED TAIL |

Sponsor Reference No. UTSW-Gray-SPG50-004

Test Facility Study No. 5550014

**Appendix 5****Individual Body Weights****5550014**

Sex: Male Bodyweight (kg)

| 0<br>vg<br><br>Group 1 | Day(s) Relative<br>to Start Date |     |     |     |     |     |     |
|------------------------|----------------------------------|-----|-----|-----|-----|-----|-----|
|                        | -13                              | -8  | -1  | 7   | 14  | 21  | 28  |
| 1201                   | 3.0                              | 3.0 | 3.2 | 3.0 | 3.1 | 3.0 | 3.0 |

Sponsor Reference No. UTSW-Gray-SPG50-004

Test Facility Study No. 5550014

**Appendix 5****Individual Body Weights****5550014**

Sex: Male Bodyweight (kg)

| 0<br>vg<br><br>Group 1 | Day(s) Relative<br>to Start Date |     |     |     |     |     |     |
|------------------------|----------------------------------|-----|-----|-----|-----|-----|-----|
|                        | 35                               | 42  | 49  | 56  | 63  | 70  | 77  |
| 1201                   | 3.0                              | 3.1 | 3.0 | 3.0 | 3.1 | 3.1 | 3.1 |

**Appendix 5****Individual Body Weights****5550014**

Sex: Male Bodyweight (kg)

| 0<br>vg<br><br>Group 1 | Day(s) Relative<br>to Start Date |     |     |
|------------------------|----------------------------------|-----|-----|
|                        | 84                               | 91  | 94  |
| 1201                   | 3.1                              | 3.1 | 3.1 |

Sponsor Reference No. UTSW-Gray-SPG50-004

Test Facility Study No. 5550014

**Appendix 5****Individual Body Weights****5550014**

Sex: Male Bodyweight (kg)

| 1.68<br>X10E14<br>vg<br>Group 3 | Day(s) Relative<br>to Start Date |     |     |     |     |     |     |
|---------------------------------|----------------------------------|-----|-----|-----|-----|-----|-----|
|                                 | -13                              | -8  | -1  | 7   | 14  | 21  | 28  |
| 3201                            | 2.9                              | 2.9 | 3.1 | 3.1 | 3.1 | 2.9 | 2.9 |

Sponsor Reference No. UTSW-Gray-SPG50-004

Test Facility Study No. 5550014

**Appendix 5****Individual Body Weights****5550014**

Sex: Male Bodyweight (kg)

| 1.68<br>X10E14<br>vg<br>Group 3 | Day(s) Relative<br>to Start Date |     |     |     |     |     |     |
|---------------------------------|----------------------------------|-----|-----|-----|-----|-----|-----|
|                                 | 35                               | 42  | 49  | 56  | 63  | 70  | 77  |
| 3201                            | 2.9                              | 3.0 | 3.0 | 3.0 | 3.0 | 3.1 | 3.0 |

Sponsor Reference No. UTSW-Gray-SPG50-004

Test Facility Study No. 5550014

**Appendix 5****Individual Body Weights****5550014**

Sex: Male Bodyweight (kg)

|                                 |                                  |     |     |
|---------------------------------|----------------------------------|-----|-----|
| 1.68<br>X10E14<br>vg<br>Group 3 | Day(s) Relative<br>to Start Date |     |     |
|                                 | 84                               | 91  | 94  |
| 3201                            | 3.1                              | 3.0 | 2.9 |

Sponsor Reference No. UTSW-Gray-SPG50-004

Test Facility Study No. 5550014

**Appendix 5****Individual Body Weights****5550014**

Sex: Female Bodyweight (kg)

| 0<br>vg<br><br>Group 1 | Day(s) Relative<br>to Start Date |                  |                  |     |     |     |     |
|------------------------|----------------------------------|------------------|------------------|-----|-----|-----|-----|
|                        | -13                              | -8               | -1               | 7   | 14  | 21  | 28  |
| 1701                   | 2.9                              | 2.7 <sup>a</sup> | 3.0 <sup>a</sup> | 2.7 | 2.9 | 2.7 | 2.7 |

<sup>a</sup> [RC:Value Confirmed]

Sponsor Reference No. UTSW-Gray-SPG50-004

Test Facility Study No. 5550014

**Appendix 5****Individual Body Weights****5550014**

Sex: Female Bodyweight (kg)

| 0<br>vg<br><br>Group 1 | Day(s) Relative<br>to Start Date |     |     |     |     |     |     |
|------------------------|----------------------------------|-----|-----|-----|-----|-----|-----|
|                        | 35                               | 42  | 49  | 56  | 63  | 70  | 77  |
| 1701                   | 2.7                              | 2.7 | 2.7 | 2.7 | 2.8 | 2.8 | 2.7 |

Sponsor Reference No. UTSW-Gray-SPG50-004

Test Facility Study No. 5550014

**Appendix 5****Individual Body Weights****5550014**

Sex: Female Bodyweight (kg)

| 0<br>vg<br><br>Group 1 | Day(s) Relative<br>to Start Date |     |     |
|------------------------|----------------------------------|-----|-----|
|                        | 84                               | 91  | 94  |
| 1701                   | 2.7                              | 2.7 | 2.6 |

Sponsor Reference No. UTSW-Gray-SPG50-004

Test Facility Study No. 5550014

**Appendix 5****Individual Body Weights****5550014**

Sex: Female Bodyweight (kg)

| 8.4<br>X10E13<br>vg<br>Group 2 | Day(s) Relative<br>to Start Date |     |     |     |     |                  |     |
|--------------------------------|----------------------------------|-----|-----|-----|-----|------------------|-----|
|                                | -13                              | -8  | -1  | 7   | 14  | 21               | 28  |
| 2701                           | 2.7                              | 2.6 | 2.6 | 2.4 | 2.6 | 2.4 <sup>a</sup> | 2.5 |
| 2702                           | 3.5                              | 3.4 | 3.4 | 3.4 | 3.5 | 3.3              | 3.2 |

<sup>a</sup> [RC:2.4 kg weight verified]

Sponsor Reference No. UTSW-Gray-SPG50-004

Test Facility Study No. 5550014

**Appendix 5****Individual Body Weights****5550014**

Sex: Female Bodyweight (kg)

| 8.4<br>X10E13<br>vg<br>Group 2 | Day(s) Relative<br>to Start Date |     |     |     |     |     |                  |
|--------------------------------|----------------------------------|-----|-----|-----|-----|-----|------------------|
|                                | 35                               | 42  | 49  | 56  | 63  | 70  | 77               |
| 2701                           | 2.5                              | 2.6 | 2.5 | 2.4 | 2.6 | 2.8 | 2.6 <sup>a</sup> |
| 2702                           | 3.2                              | 3.3 | 3.4 | 3.3 | 3.5 | 3.6 | 3.5              |

<sup>a</sup> [RC:2.6 kg weight verified]

Sponsor Reference No. UTSW-Gray-SPG50-004

Test Facility Study No. 5550014

**Appendix 5****Individual Body Weights****5550014**

Sex: Female Bodyweight (kg)

| 8.4<br>X10E13<br>vg<br>Group 2 | Day(s) Relative<br>to Start Date |     |     |
|--------------------------------|----------------------------------|-----|-----|
|                                | 84                               | 91  | 94  |
| 2701                           | 2.5                              | 2.5 | 2.4 |
| 2702                           | 3.5                              | 3.4 | 3.3 |

Sponsor Reference No. UTSW-Gray-SPG50-004

Test Facility Study No. 5550014

**Appendix 5****Individual Body Weights****5550014**

Sex: Female Bodyweight (kg)

| 1.68<br>X10E14<br>vg<br>Group 3 | Day(s) Relative<br>to Start Date |     |     |     |     |                  |     |
|---------------------------------|----------------------------------|-----|-----|-----|-----|------------------|-----|
|                                 | -13                              | -8  | -1  | 7   | 14  | 21               | 28  |
| 3701                            | 2.8                              | 2.8 | 2.9 | 2.7 | 2.9 | 2.6 <sup>a</sup> | 2.6 |

<sup>a</sup> [RC:2.6 kg weight verified]

Sponsor Reference No. UTSW-Gray-SPG50-004

Test Facility Study No. 5550014

**Appendix 5****Individual Body Weights****5550014**

Sex: Female Bodyweight (kg)

| 1.68<br>X10E14<br>vg<br>Group 3 | Day(s) Relative<br>to Start Date |     |     |     |     |     |     |
|---------------------------------|----------------------------------|-----|-----|-----|-----|-----|-----|
|                                 | 35                               | 42  | 49  | 56  | 63  | 70  | 77  |
| 3701                            | 2.6                              | 2.8 | 2.7 | 2.6 | 2.8 | 2.9 | 2.9 |

**Appendix 5****Individual Body Weights****5550014**

Sex: Female Bodyweight (kg)

|                                 |                                  |     |     |
|---------------------------------|----------------------------------|-----|-----|
| 1.68<br>X10E14<br>vg<br>Group 3 | Day(s) Relative<br>to Start Date |     |     |
|                                 | 84                               | 91  | 94  |
| 3701                            | 2.9                              | 2.8 | 2.8 |

Sponsor Reference No. UTSW-Gray-SPG50-004

Test Facility Study No. 5550014

**Appendix 6****Individual Body Weight Gains (kg)****5550014**

Sex: Male Bodyweight Gain (Interval)

| 0<br>vg<br><br>Group 1 | Day(s) Relative<br>to Start Date |         |        |        |         |         |         |
|------------------------|----------------------------------|---------|--------|--------|---------|---------|---------|
|                        | -13 → -8                         | -8 → -1 | -1 → 7 | 7 → 14 | 14 → 21 | 21 → 28 | 28 → 35 |
| 1201                   | 0.0                              | 0.2     | -0.2   | 0.1    | -0.1    | 0.0     | 0.0     |

Sponsor Reference No. UTSW-Gray-SPG50-004

Test Facility Study No. 5550014

**Appendix 6****Individual Body Weight Gains (kg)****5550014**

Sex: Male Bodyweight Gain (Interval)

| 0<br>vg<br><br>Group 1 | Day(s) Relative<br>to Start Date |         |         |         |         |         |         |
|------------------------|----------------------------------|---------|---------|---------|---------|---------|---------|
|                        | 35 → 42                          | 42 → 49 | 49 → 56 | 56 → 63 | 63 → 70 | 70 → 77 | 77 → 84 |
| 1201                   | 0.1                              | -0.1    | 0.0     | 0.1     | 0.0     | 0.0     | 0.0     |

Sponsor Reference No. UTSW-Gray-SPG50-004

Test Facility Study No. 5550014

**Appendix 6****Individual Body Weight Gains (kg)****5550014**

Sex: Male Bodyweight Gain (Interval)

| 0<br>vg<br><br>Group 1 | Day(s) Relative<br>to Start Date |         |         |
|------------------------|----------------------------------|---------|---------|
|                        | 84 → 91                          | -1 → 91 | 91 → 94 |
| 1201                   | 0.0                              | -0.1    | 0.0     |

Sponsor Reference No. UTSW-Gray-SPG50-004

Test Facility Study No. 5550014

**Appendix 6****Individual Body Weight Gains (kg)****5550014**

Sex: Male Bodyweight Gain (Interval)

| 1.68<br>X10E14<br>vg<br>Group 3 | Day(s) Relative<br>to Start Date |         |        |        |         |         |         |
|---------------------------------|----------------------------------|---------|--------|--------|---------|---------|---------|
|                                 | -13 → -8                         | -8 → -1 | -1 → 7 | 7 → 14 | 14 → 21 | 21 → 28 | 28 → 35 |
| 3201                            | 0.0                              | 0.2     | 0.0    | 0.0    | -0.2    | 0.0     | 0.0     |

Sponsor Reference No. UTSW-Gray-SPG50-004

Test Facility Study No. 5550014

**Appendix 6****Individual Body Weight Gains (kg)****5550014**

Sex: Male Bodyweight Gain (Interval)

| 1.68<br>X10E14<br>vg<br>Group 3 | Day(s) Relative<br>to Start Date |         |         |         |         |         |         |
|---------------------------------|----------------------------------|---------|---------|---------|---------|---------|---------|
|                                 | 35 → 42                          | 42 → 49 | 49 → 56 | 56 → 63 | 63 → 70 | 70 → 77 | 77 → 84 |
| 3201                            | 0.1                              | 0.0     | 0.0     | 0.0     | 0.1     | -0.1    | 0.1     |

**Appendix 6****Individual Body Weight Gains (kg)****5550014**

Sex: Male Bodyweight Gain (Interval)

| 1.68<br>X10E14<br>vg<br>Group 3 | Day(s) Relative<br>to Start Date |         |         |
|---------------------------------|----------------------------------|---------|---------|
|                                 | 84 → 91                          | -1 → 91 | 91 → 94 |
| 3201                            | -0.1                             | -0.1    | -0.1    |

Sponsor Reference No. UTSW-Gray-SPG50-004

Test Facility Study No. 5550014

**Appendix 6****Individual Body Weight Gains (kg)****5550014**

Sex: Female Bodyweight Gain (Interval)

| 0<br>vg<br><br>Group 1 | Day(s) Relative<br>to Start Date |         |        |        |         |         |         |
|------------------------|----------------------------------|---------|--------|--------|---------|---------|---------|
|                        | -13 → -8                         | -8 → -1 | -1 → 7 | 7 → 14 | 14 → 21 | 21 → 28 | 28 → 35 |
| 1701                   | -0.2                             | 0.3     | -0.3   | 0.2    | -0.2    | 0.0     | 0.0     |

Sponsor Reference No. UTSW-Gray-SPG50-004

Test Facility Study No. 5550014

**Appendix 6****Individual Body Weight Gains (kg)****5550014**

Sex: Female Bodyweight Gain (Interval)

| 0<br>vg<br><br>Group 1 | Day(s) Relative<br>to Start Date |         |         |         |         |         |         |
|------------------------|----------------------------------|---------|---------|---------|---------|---------|---------|
|                        | 35 → 42                          | 42 → 49 | 49 → 56 | 56 → 63 | 63 → 70 | 70 → 77 | 77 → 84 |
| 1701                   | 0.0                              | 0.0     | 0.0     | 0.1     | 0.0     | -0.1    | 0.0     |

Sponsor Reference No. UTSW-Gray-SPG50-004

Test Facility Study No. 5550014

**Appendix 6****Individual Body Weight Gains (kg)****5550014**

Sex: Female Bodyweight Gain (Interval)

| 0<br>vg<br><br>Group 1 | Day(s) Relative<br>to Start Date |         |         |
|------------------------|----------------------------------|---------|---------|
|                        | 84 → 91                          | -1 → 91 | 91 → 94 |
| 1701                   | 0.0                              | -0.3    | -0.1    |

Sponsor Reference No. UTSW-Gray-SPG50-004

Test Facility Study No. 5550014

**Appendix 6****Individual Body Weight Gains (kg)****5550014**

Sex: Female Bodyweight Gain (Interval)

| 8.4<br>X10E13<br>vg<br>Group 2 | Day(s) Relative<br>to Start Date |         |        |        |         |         |         |
|--------------------------------|----------------------------------|---------|--------|--------|---------|---------|---------|
|                                | -13 → -8                         | -8 → -1 | -1 → 7 | 7 → 14 | 14 → 21 | 21 → 28 | 28 → 35 |
| 2701                           | -0.1                             | 0.0     | -0.2   | 0.2    | -0.2    | 0.1     | 0.0     |
| 2702                           | -0.1                             | 0.0     | 0.0    | 0.1    | -0.2    | -0.1    | 0.0     |

Sponsor Reference No. UTSW-Gray-SPG50-004

Test Facility Study No. 5550014

**Appendix 6****Individual Body Weight Gains (kg)****5550014**

Sex: Female Bodyweight Gain (Interval)

| 8.4<br>X10E13<br>vg<br>Group 2 | Day(s) Relative<br>to Start Date |         |         |         |         |         |         |
|--------------------------------|----------------------------------|---------|---------|---------|---------|---------|---------|
|                                | 35 → 42                          | 42 → 49 | 49 → 56 | 56 → 63 | 63 → 70 | 70 → 77 | 77 → 84 |
| 2701                           | 0.1                              | -0.1    | -0.1    | 0.2     | 0.2     | -0.2    | -0.1    |
| 2702                           | 0.1                              | 0.1     | -0.1    | 0.2     | 0.1     | -0.1    | 0.0     |

Sponsor Reference No. UTSW-Gray-SPG50-004

Test Facility Study No. 5550014

**Appendix 6****Individual Body Weight Gains (kg)****5550014**

Sex: Female Bodyweight Gain (Interval)

| 8.4<br>X10E13<br>vg<br>Group 2 | Day(s) Relative<br>to Start Date |         |         |
|--------------------------------|----------------------------------|---------|---------|
|                                | 84 → 91                          | -1 → 91 | 91 → 94 |
| 2701                           | 0.0                              | -0.1    | -0.1    |
| 2702                           | -0.1                             | 0.0     | -0.1    |

Sponsor Reference No. UTSW-Gray-SPG50-004

Test Facility Study No. 5550014

**Appendix 6****Individual Body Weight Gains (kg)****5550014**

Sex: Female Bodyweight Gain (Interval)

| 1.68<br>X10E14<br>vg<br>Group 3 | Day(s) Relative<br>to Start Date |         |        |        |         |         |         |
|---------------------------------|----------------------------------|---------|--------|--------|---------|---------|---------|
|                                 | -13 → -8                         | -8 → -1 | -1 → 7 | 7 → 14 | 14 → 21 | 21 → 28 | 28 → 35 |
| 3701                            | 0.0                              | 0.1     | -0.2   | 0.2    | -0.3    | 0.0     | 0.0     |

Sponsor Reference No. UTSW-Gray-SPG50-004

Test Facility Study No. 5550014

**Appendix 6****Individual Body Weight Gains (kg)****5550014**

Sex: Female Bodyweight Gain (Interval)

| 1.68<br>X10E14<br>vg<br>Group 3 | Day(s) Relative<br>to Start Date |         |         |         |         |         |         |
|---------------------------------|----------------------------------|---------|---------|---------|---------|---------|---------|
|                                 | 35 → 42                          | 42 → 49 | 49 → 56 | 56 → 63 | 63 → 70 | 70 → 77 | 77 → 84 |
| 3701                            | 0.2                              | -0.1    | -0.1    | 0.2     | 0.1     | 0.0     | 0.0     |

Sponsor Reference No. UTSW-Gray-SPG50-004

Test Facility Study No. 5550014

**Appendix 6****Individual Body Weight Gains (kg)****5550014**

Sex: Female Bodyweight Gain (Interval)

|                                 |                                  |         |         |
|---------------------------------|----------------------------------|---------|---------|
| 1.68<br>X10E14<br>vg<br>Group 3 | Day(s) Relative<br>to Start Date |         |         |
|                                 | 84 → 91                          | -1 → 91 | 91 → 94 |
| 3701                            | -0.1                             | -0.1    | 0.0     |

Sponsor Reference No. UTSW-Gray-SPG50-004

Test Facility Study No. 5550014

**Appendix 7****Individual Neurological Examinations****5550014**

Sex: Male

| 0<br>vg<br><br>Group 1      Day(s) Relative to<br>Start Date |          | Neuro (NHP)             |                           |                           |                           |                           |                            |
|--------------------------------------------------------------|----------|-------------------------|---------------------------|---------------------------|---------------------------|---------------------------|----------------------------|
|                                                              |          | Gen Att/Mot<br>Function | Proprio Pos<br>L Hindlimb | Proprio Pos<br>R Hindlimb | Placing Reac<br>Visual LH | Placing Reac<br>Visual RH | Placing Reac<br>Tactile LH |
| 1201                                                         | -7       | Normal                  | Normal                    | Normal                    | Normal                    | Normal                    | Normal                     |
|                                                              | 1 (4-6H) | Normal                  | Normal                    | Normal                    | Normal                    | Normal                    | Normal                     |
|                                                              | 2        | Normal                  | Normal                    | Normal                    | Normal                    | Normal                    | Normal                     |
|                                                              | 7 (DE)   | Normal                  | Normal                    | Normal                    | Normal                    | Normal                    | Normal                     |
|                                                              | 28 (DE)  | Normal                  | Normal                    | Normal                    | Normal                    | Normal                    | Normal                     |
|                                                              | 94       | Normal                  | Normal                    | Normal                    | Normal                    | Normal                    | Normal                     |

Sponsor Reference No. UTSW-Gray-SPG50-004

Test Facility Study No. 5550014

**Appendix 7****Individual Neurological Examinations****5550014**

Sex: Male

| 0<br>vg<br><br>Group 1      Day(s) Relative to<br>Start Date |          | Neuro (NHP)                |                  |                   |                  |                      |                       |
|--------------------------------------------------------------|----------|----------------------------|------------------|-------------------|------------------|----------------------|-----------------------|
|                                                              |          | Placing Reac<br>Tactile RH | Head<br>Movement | Pupil<br>Symmetry | Head<br>Symmetry | Eye Position<br>Left | Eye Position<br>Right |
| 1201                                                         | -7       | Normal                     | Normal           | Normal            | Normal           | Normal               | Normal                |
|                                                              | 1 (4-6H) | Normal                     | Normal           | Normal            | Normal           | Normal               | Normal                |
|                                                              | 2        | Normal                     | Normal           | Normal            | Normal           | Normal               | Normal                |
|                                                              | 7 (DE)   | Normal                     | Normal           | Normal            | Normal           | Normal               | Normal                |
|                                                              | 28 (DE)  | Normal                     | Normal           | Normal            | Normal           | Normal               | Normal                |
|                                                              | 94       | Normal                     | Normal           | Normal            | Normal           | Normal               | Normal                |

Sponsor Reference No. UTSW-Gray-SPG50-004

Test Facility Study No. 5550014

**Appendix 7****Individual Neurological Examinations****5550014**

Sex: Male

| 0<br>vg<br><br>Group 1      Day(s) Relative to<br>Start Date |          | Neuro (NHP)              |                           |                       |                        |                     |                          |
|--------------------------------------------------------------|----------|--------------------------|---------------------------|-----------------------|------------------------|---------------------|--------------------------|
|                                                              |          | Palpebral<br>Reflex Left | Palpebral<br>Reflex Right | Menace<br>Reflex Left | Menace<br>Reflex Right | Head Muscle<br>Tone | Pupillary<br>Light Ref L |
| 1201                                                         | -7       | Normal                   | Normal                    | Normal                | Normal                 | Normal              | Normal                   |
|                                                              | 1 (4-6H) | Normal                   | Normal                    | Normal                | Normal                 | Normal              | Normal                   |
|                                                              | 2        | Normal                   | Normal                    | Normal                | Normal                 | Normal              | Normal                   |
|                                                              | 7 (DE)   | Normal                   | Normal                    | Normal                | Normal                 | Normal              | Normal                   |
|                                                              | 28 (DE)  | Normal                   | Normal                    | Normal                | Normal                 | Normal              | Normal                   |
|                                                              | 94       | Normal                   | Normal                    | Normal                | Normal                 | Normal              | Normal                   |

Sponsor Reference No. UTSW-Gray-SPG50-004

Test Facility Study No. 5550014

**Appendix 7****Individual Neurological Examinations****5550014**

Sex: Male

| 0<br>vg<br><br>Group 1      Day(s) Relative to<br>Start Date |          | Neuro (NHP)              |                         |                           |                           |                     |                     |
|--------------------------------------------------------------|----------|--------------------------|-------------------------|---------------------------|---------------------------|---------------------|---------------------|
|                                                              |          | Pupillary<br>Light Ref R | Vestibular<br>Nystagmus | Muscle Tone<br>L Hindlimb | Muscle Tone<br>R Hindlimb | Flexor<br>Reflex LH | Flexor<br>Reflex RH |
| 1201                                                         | -7       | Normal                   | Normal                  | Normal                    | Normal                    | Normal              | Normal              |
|                                                              | 1 (4-6H) | Normal                   | Normal                  | Normal                    | Normal                    | Normal              | Normal              |
|                                                              | 2        | Normal                   | Normal                  | Normal                    | Normal                    | Normal              | Normal              |
|                                                              | 7 (DE)   | Normal                   | Normal                  | Normal                    | Normal                    | Normal              | Normal              |
|                                                              | 28 (DE)  | Normal                   | Normal                  | Normal                    | Normal                    | Normal              | Normal              |
|                                                              | 94       | Normal                   | Normal                  | Normal                    | Normal                    | Normal              | Normal              |

**Appendix 7****Individual Neurological Examinations****5550014**

Sex: Male

| 0<br>vg<br><br>Group 1      Day(s) Relative to<br>Start Date |          | Neuro (NHP)         |                     |                    |             |
|--------------------------------------------------------------|----------|---------------------|---------------------|--------------------|-------------|
|                                                              |          | Flexor<br>Reflex LF | Flexor<br>Reflex RF | Perineal<br>Reflex | Jaw<br>Tone |
| 1201                                                         | -7       | Normal              | Normal              | Normal             | Normal      |
|                                                              | 1 (4-6H) | Normal              | Normal              | Normal             | Normal      |
|                                                              | 2        | Normal              | Normal              | Normal             | Normal      |
|                                                              | 7 (DE)   | Normal              | Normal              | Normal             | Normal      |
|                                                              | 28 (DE)  | Normal              | Normal              | Normal             | Normal      |
|                                                              | 94       | Normal              | Normal              | Normal             | Normal      |

**Appendix 7****Individual Neurological Examinations****5550014**

Sex: Male

| 1.68<br>X10E14<br>vg<br>Group 3      Day(s) Relative to<br>Start Date |          | Neuro (NHP)             |                           |                           |                           |                           |                            |
|-----------------------------------------------------------------------|----------|-------------------------|---------------------------|---------------------------|---------------------------|---------------------------|----------------------------|
|                                                                       |          | Gen Att/Mot<br>Function | Proprio Pos<br>L Hindlimb | Proprio Pos<br>R Hindlimb | Placing Reac<br>Visual LH | Placing Reac<br>Visual RH | Placing Reac<br>Tactile LH |
| 3201                                                                  | -7       | Normal                  | Normal                    | Normal                    | Normal                    | Normal                    | Normal                     |
|                                                                       | 1 (4-6H) | Normal                  | Normal                    | Normal                    | Normal                    | Normal                    | Normal                     |
|                                                                       | 2        | Normal                  | Normal                    | Normal                    | Normal                    | Normal                    | Normal                     |
|                                                                       | 7 (DE)   | Normal                  | Normal                    | Normal                    | Normal                    | Normal                    | Normal                     |
|                                                                       | 28 (DE)  | Normal                  | Normal                    | Normal                    | Normal                    | Normal                    | Normal                     |
|                                                                       | 94       | Abnormal <sup>a</sup>   | Decreased                 | Normal                    | Normal                    | Normal                    | Normal                     |

<sup>a</sup> [RC:tremors slight hl, hr]

**Appendix 7****Individual Neurological Examinations****5550014**

Sex: Male

| 1.68<br>X10E14<br>vg<br>Group 3      Day(s) Relative to<br>Start Date |          | Neuro (NHP)                |                  |                   |                  |                      |                       |
|-----------------------------------------------------------------------|----------|----------------------------|------------------|-------------------|------------------|----------------------|-----------------------|
|                                                                       |          | Placing Reac<br>Tactile RH | Head<br>Movement | Pupil<br>Symmetry | Head<br>Symmetry | Eye Position<br>Left | Eye Position<br>Right |
| 3201                                                                  | -7       | Normal                     | Normal           | Normal            | Normal           | Normal               | Normal                |
|                                                                       | 1 (4-6H) | Normal                     | Normal           | Normal            | Normal           | Normal               | Normal                |
|                                                                       | 2        | Normal                     | Normal           | Normal            | Normal           | Normal               | Normal                |
|                                                                       | 7 (DE)   | Normal                     | Normal           | Normal            | Normal           | Normal               | Normal                |
|                                                                       | 28 (DE)  | Normal                     | Normal           | Normal            | Normal           | Normal               | Normal                |
|                                                                       | 94       | Normal                     | Normal           | Normal            | Normal           | Normal               | Normal                |

Sponsor Reference No. UTSW-Gray-SPG50-004

Test Facility Study No. 5550014

**Appendix 7****Individual Neurological Examinations****5550014**

Sex: Male

| 1.68<br>X10E14<br>vg<br>Group 3      Day(s) Relative to<br>Start Date |          | Neuro (NHP)              |                           |                       |                        |                     |                          |
|-----------------------------------------------------------------------|----------|--------------------------|---------------------------|-----------------------|------------------------|---------------------|--------------------------|
|                                                                       |          | Palpebral<br>Reflex Left | Palpebral<br>Reflex Right | Menace<br>Reflex Left | Menace<br>Reflex Right | Head Muscle<br>Tone | Pupillary<br>Light Ref L |
| 3201                                                                  | -7       | Normal                   | Normal                    | Normal                | Normal                 | Normal              | Normal                   |
|                                                                       | 1 (4-6H) | Normal                   | Normal                    | Normal                | Normal                 | Normal              | Normal                   |
|                                                                       | 2        | Normal                   | Normal                    | Normal                | Normal                 | Normal              | Normal                   |
|                                                                       | 7 (DE)   | Normal                   | Normal                    | Normal                | Normal                 | Normal              | Normal                   |
|                                                                       | 28 (DE)  | Normal                   | Normal                    | Normal                | Normal                 | Normal              | Normal                   |
|                                                                       | 94       | Normal                   | Normal                    | Normal                | Normal                 | Normal              | Normal                   |

**Appendix 7****Individual Neurological Examinations****5550014**

Sex: Male

| 1.68<br>X10E14<br>vg<br>Group 3      Day(s) Relative to<br>Start Date |          | Neuro (NHP)              |                         |                           |                           |                     |                     |
|-----------------------------------------------------------------------|----------|--------------------------|-------------------------|---------------------------|---------------------------|---------------------|---------------------|
|                                                                       |          | Pupillary<br>Light Ref R | Vestibular<br>Nystagmus | Muscle Tone<br>L Hindlimb | Muscle Tone<br>R Hindlimb | Flexor<br>Reflex LH | Flexor<br>Reflex RH |
| 3201                                                                  | -7       | Normal                   | Normal                  | Normal                    | Normal                    | Normal              | Normal              |
|                                                                       | 1 (4-6H) | Normal                   | Normal                  | Normal                    | Normal                    | Normal              | Normal              |
|                                                                       | 2        | Normal                   | Normal                  | Normal                    | Normal                    | Normal              | Normal              |
|                                                                       | 7 (DE)   | Normal                   | Normal                  | Normal                    | Normal                    | Normal              | Normal              |
|                                                                       | 28 (DE)  | Normal                   | Normal                  | Normal                    | Normal                    | Normal              | Normal              |
|                                                                       | 94       | Normal                   | Normal                  | Normal                    | Normal                    | Normal              | Normal              |

**Appendix 7****Individual Neurological Examinations****5550014**

Sex: Male

| 1.68<br>X10E14<br>vg<br>Group 3      Day(s) Relative to<br>Start Date |          | Neuro (NHP)         |                     |                    |             |
|-----------------------------------------------------------------------|----------|---------------------|---------------------|--------------------|-------------|
|                                                                       |          | Flexor<br>Reflex LF | Flexor<br>Reflex RF | Perineal<br>Reflex | Jaw<br>Tone |
| 3201                                                                  | -7       | Normal              | Normal              | Normal             | Normal      |
|                                                                       | 1 (4-6H) | Normal              | Normal              | Normal             | Normal      |
|                                                                       | 2        | Normal              | Normal              | Normal             | Normal      |
|                                                                       | 7 (DE)   | Normal              | Normal              | Normal             | Normal      |
|                                                                       | 28 (DE)  | Normal              | Normal              | Normal             | Normal      |
|                                                                       | 94       | Normal              | Normal              | Normal             | Normal      |

**Appendix 7****Individual Neurological Examinations****5550014**

Sex: Female

| 0<br>vg<br><br>Group 1      Day(s) Relative to<br>Start Date |          | Neuro (NHP)             |                           |                           |                           |                           |                            |
|--------------------------------------------------------------|----------|-------------------------|---------------------------|---------------------------|---------------------------|---------------------------|----------------------------|
|                                                              |          | Gen Att/Mot<br>Function | Proprio Pos<br>L Hindlimb | Proprio Pos<br>R Hindlimb | Placing Reac<br>Visual LH | Placing Reac<br>Visual RH | Placing Reac<br>Tactile LH |
| 1701                                                         | -7       | Normal                  | Normal                    | Normal                    | Normal                    | Normal                    | Normal                     |
|                                                              | 1 (4-6H) | Normal                  | Normal                    | Normal                    | Normal                    | Normal                    | Normal                     |
|                                                              | 2        | Normal                  | Normal                    | Normal                    | Normal                    | Normal                    | Normal                     |
|                                                              | 7 (DE)   | Normal                  | Normal                    | Normal                    | Normal                    | Normal                    | Normal                     |
|                                                              | 28 (DE)  | Normal                  | Normal                    | Normal                    | Normal                    | Normal                    | Normal                     |
|                                                              | 94       | Normal                  | Normal                    | Normal                    | Normal                    | Normal                    | Normal                     |

Sponsor Reference No. UTSW-Gray-SPG50-004

Test Facility Study No. 5550014

**Appendix 7****Individual Neurological Examinations****5550014**

Sex: Female

| 0<br>vg<br><br>Group 1      Day(s) Relative to<br>Start Date |          | Neuro (NHP)                |                  |                   |                  |                      |                       |
|--------------------------------------------------------------|----------|----------------------------|------------------|-------------------|------------------|----------------------|-----------------------|
|                                                              |          | Placing Reac<br>Tactile RH | Head<br>Movement | Pupil<br>Symmetry | Head<br>Symmetry | Eye Position<br>Left | Eye Position<br>Right |
| 1701                                                         | -7       | Normal                     | Normal           | Normal            | Normal           | Normal               | Normal                |
|                                                              | 1 (4-6H) | Normal                     | Normal           | Normal            | Normal           | Normal               | Normal                |
|                                                              | 2        | Normal                     | Normal           | Normal            | Normal           | Normal               | Normal                |
|                                                              | 7 (DE)   | Normal                     | Normal           | Normal            | Normal           | Normal               | Normal                |
|                                                              | 28 (DE)  | Normal                     | Normal           | Normal            | Normal           | Normal               | Normal                |
|                                                              | 94       | Normal                     | Normal           | Normal            | Normal           | Normal               | Normal                |

Sponsor Reference No. UTSW-Gray-SPG50-004

Test Facility Study No. 5550014

**Appendix 7****Individual Neurological Examinations****5550014**

Sex: Female

| 0<br>vg<br><br>Group 1      Day(s) Relative to<br>Start Date |          | Neuro (NHP)              |                           |                       |                        |                     |                          |
|--------------------------------------------------------------|----------|--------------------------|---------------------------|-----------------------|------------------------|---------------------|--------------------------|
|                                                              |          | Palpebral<br>Reflex Left | Palpebral<br>Reflex Right | Menace<br>Reflex Left | Menace<br>Reflex Right | Head Muscle<br>Tone | Pupillary<br>Light Ref L |
| 1701                                                         | -7       | Normal                   | Normal                    | Normal                | Normal                 | Normal              | Normal                   |
|                                                              | 1 (4-6H) | Normal                   | Normal                    | Normal                | Normal                 | Normal              | Normal                   |
|                                                              | 2        | Normal                   | Normal                    | Normal                | Normal                 | Normal              | Normal                   |
|                                                              | 7 (DE)   | Normal                   | Normal                    | Normal                | Normal                 | Normal              | Normal                   |
|                                                              | 28 (DE)  | Normal                   | Normal                    | Normal                | Normal                 | Normal              | Normal                   |
|                                                              | 94       | Normal                   | Normal                    | Normal                | Normal                 | Normal              | Normal                   |

Sponsor Reference No. UTSW-Gray-SPG50-004

Test Facility Study No. 5550014

**Appendix 7****Individual Neurological Examinations****5550014**

Sex: Female

| 0<br>vg<br><br>Group 1      Day(s) Relative to<br>Start Date |          | Neuro (NHP)              |                         |                           |                           |                     |                     |
|--------------------------------------------------------------|----------|--------------------------|-------------------------|---------------------------|---------------------------|---------------------|---------------------|
|                                                              |          | Pupillary<br>Light Ref R | Vestibular<br>Nystagmus | Muscle Tone<br>L Hindlimb | Muscle Tone<br>R Hindlimb | Flexor<br>Reflex LH | Flexor<br>Reflex RH |
| 1701                                                         | -7       | Normal                   | Normal                  | Normal                    | Normal                    | Normal              | Normal              |
|                                                              | 1 (4-6H) | Normal                   | Normal                  | Normal                    | Normal                    | Normal              | Normal              |
|                                                              | 2        | Normal                   | Normal                  | Normal                    | Normal                    | Normal              | Normal              |
|                                                              | 7 (DE)   | Normal                   | Normal                  | Normal                    | Normal                    | Normal              | Normal              |
|                                                              | 28 (DE)  | Normal                   | Normal                  | Normal                    | Normal                    | Normal              | Normal              |
|                                                              | 94       | Normal                   | Normal                  | Normal                    | Normal                    | Normal              | Normal              |

**Appendix 7****Individual Neurological Examinations****5550014**

Sex: Female

| 0<br>vg<br><br>Group 1      Day(s) Relative to<br>Start Date |          | Neuro (NHP)         |                     |                    |             |
|--------------------------------------------------------------|----------|---------------------|---------------------|--------------------|-------------|
|                                                              |          | Flexor<br>Reflex LF | Flexor<br>Reflex RF | Perineal<br>Reflex | Jaw<br>Tone |
| 1701                                                         | -7       | Normal              | Normal              | Normal             | Normal      |
|                                                              | 1 (4-6H) | Normal              | Normal              | Normal             | Normal      |
|                                                              | 2        | Normal              | Normal              | Normal             | Normal      |
|                                                              | 7 (DE)   | Normal              | Normal              | Normal             | Normal      |
|                                                              | 28 (DE)  | Normal              | Normal              | Normal             | Normal      |
|                                                              | 94       | Normal              | Normal              | Normal             | Normal      |

**Appendix 7****Individual Neurological Examinations****5550014**

Sex: Female

| 8.4<br>X10E13<br>vg<br>Group 2      Day(s) Relative to<br>Start Date |          | Neuro (NHP)             |                           |                           |                           |                           |                            |
|----------------------------------------------------------------------|----------|-------------------------|---------------------------|---------------------------|---------------------------|---------------------------|----------------------------|
|                                                                      |          | Gen Att/Mot<br>Function | Proprio Pos<br>L Hindlimb | Proprio Pos<br>R Hindlimb | Placing Reac<br>Visual LH | Placing Reac<br>Visual RH | Placing Reac<br>Tactile LH |
| 2701                                                                 | -7       | Normal                  | Normal                    | Normal                    | Normal                    | Normal                    | Normal                     |
|                                                                      | 1 (4-6H) | Normal                  | Normal                    | Normal                    | Normal                    | Normal                    | Normal                     |
|                                                                      | 2        | Normal                  | Normal                    | Normal                    | Normal                    | Normal                    | Normal                     |
|                                                                      | 7 (DE)   | Normal                  | Normal                    | Normal                    | Normal                    | Normal                    | Normal                     |
|                                                                      | 28 (DE)  | Normal                  | Normal                    | Normal                    | Normal                    | Normal                    | Normal                     |
|                                                                      | 94       | Normal                  | Normal                    | Normal                    | Normal                    | Normal                    | Normal                     |
| 2702                                                                 | -7       | Normal                  | Normal                    | Normal                    | Normal                    | Normal                    | Normal                     |
|                                                                      | 1 (4-6H) | Normal                  | Normal                    | Normal                    | Normal                    | Normal                    | Normal                     |
|                                                                      | 2        | Normal                  | Normal                    | Normal                    | Normal                    | Normal                    | Normal                     |
|                                                                      | 7 (DE)   | Normal                  | Normal                    | Normal                    | Normal                    | Normal                    | Normal                     |
|                                                                      | 28 (DE)  | Normal                  | Normal                    | Normal                    | Normal                    | Normal                    | Normal                     |
|                                                                      | 94       | Normal                  | Normal                    | Normal                    | Normal                    | Normal                    | Normal                     |

**Appendix 7****Individual Neurological Examinations****5550014**

Sex: Female

| 8.4<br>X10E13<br>vg<br>Group 2      Day(s) Relative to<br>Start Date |          | Neuro (NHP)                |                  |                   |                  |                      |                       |
|----------------------------------------------------------------------|----------|----------------------------|------------------|-------------------|------------------|----------------------|-----------------------|
|                                                                      |          | Placing Reac<br>Tactile RH | Head<br>Movement | Pupil<br>Symmetry | Head<br>Symmetry | Eye Position<br>Left | Eye Position<br>Right |
| 2701                                                                 | -7       | Normal                     | Normal           | Normal            | Normal           | Normal               | Normal                |
|                                                                      | 1 (4-6H) | Normal                     | Normal           | Normal            | Normal           | Normal               | Normal                |
|                                                                      | 2        | Normal                     | Normal           | Normal            | Normal           | Normal               | Normal                |
|                                                                      | 7 (DE)   | Normal                     | Normal           | Normal            | Normal           | Normal               | Normal                |
|                                                                      | 28 (DE)  | Normal                     | Normal           | Normal            | Normal           | Normal               | Normal                |
|                                                                      | 94       | Normal                     | Normal           | Normal            | Normal           | Normal               | Normal                |
| 2702                                                                 | -7       | Normal                     | Normal           | Normal            | Normal           | Normal               | Normal                |
|                                                                      | 1 (4-6H) | Normal                     | Normal           | Normal            | Normal           | Normal               | Normal                |
|                                                                      | 2        | Normal                     | Normal           | Normal            | Normal           | Normal               | Normal                |
|                                                                      | 7 (DE)   | Normal                     | Normal           | Normal            | Normal           | Normal               | Normal                |
|                                                                      | 28 (DE)  | Normal                     | Normal           | Normal            | Normal           | Normal               | Normal                |
|                                                                      | 94       | Normal                     | Normal           | Normal            | Normal           | Normal               | Normal                |

**Appendix 7****Individual Neurological Examinations****5550014**

Sex: Female

| 8.4<br>X10E13<br>vg<br>Group 2      Day(s) Relative to<br>Start Date |          | Neuro (NHP)              |                           |                       |                        |                     |                          |
|----------------------------------------------------------------------|----------|--------------------------|---------------------------|-----------------------|------------------------|---------------------|--------------------------|
|                                                                      |          | Palpebral<br>Reflex Left | Palpebral<br>Reflex Right | Menace<br>Reflex Left | Menace<br>Reflex Right | Head Muscle<br>Tone | Pupillary<br>Light Ref L |
| 2701                                                                 | -7       | Normal                   | Normal                    | Normal                | Normal                 | Normal              | Normal                   |
|                                                                      | 1 (4-6H) | Normal                   | Normal                    | Normal                | Normal                 | Normal              | Normal                   |
|                                                                      | 2        | Normal                   | Normal                    | Normal                | Normal                 | Normal              | Normal                   |
|                                                                      | 7 (DE)   | Normal                   | Normal                    | Normal                | Normal                 | Normal              | Normal                   |
|                                                                      | 28 (DE)  | Normal                   | Normal                    | Normal                | Normal                 | Normal              | Normal                   |
|                                                                      | 94       | Normal                   | Normal                    | Normal                | Normal                 | Normal              | Normal                   |
| 2702                                                                 | -7       | Normal                   | Normal                    | Normal                | Normal                 | Normal              | Normal                   |
|                                                                      | 1 (4-6H) | Normal                   | Normal                    | Normal                | Normal                 | Normal              | Normal                   |
|                                                                      | 2        | Normal                   | Normal                    | Normal                | Normal                 | Normal              | Normal                   |
|                                                                      | 7 (DE)   | Normal                   | Normal                    | Normal                | Normal                 | Normal              | Normal                   |
|                                                                      | 28 (DE)  | Normal                   | Normal                    | Normal                | Normal                 | Normal              | Normal                   |
|                                                                      | 94       | Normal                   | Normal                    | Normal                | Normal                 | Normal              | Normal                   |

**Appendix 7****Individual Neurological Examinations****5550014**

Sex: Female

| 8.4<br>X10E13<br>vg<br>Group 2      Day(s) Relative to<br>Start Date |          | Neuro (NHP)              |                         |                           |                           |                     |                     |
|----------------------------------------------------------------------|----------|--------------------------|-------------------------|---------------------------|---------------------------|---------------------|---------------------|
|                                                                      |          | Pupillary<br>Light Ref R | Vestibular<br>Nystagmus | Muscle Tone<br>L Hindlimb | Muscle Tone<br>R Hindlimb | Flexor<br>Reflex LH | Flexor<br>Reflex RH |
| 2701                                                                 | -7       | Normal                   | Normal                  | Normal                    | Normal                    | Normal              | Normal              |
|                                                                      | 1 (4-6H) | Normal                   | Normal                  | Normal                    | Normal                    | Normal              | Normal              |
|                                                                      | 2        | Normal                   | Normal                  | Normal                    | Normal                    | Normal              | Normal              |
|                                                                      | 7 (DE)   | Normal                   | Normal                  | Normal                    | Normal                    | Normal              | Normal              |
|                                                                      | 28 (DE)  | Normal                   | Normal                  | Normal                    | Normal                    | Normal              | Normal              |
|                                                                      | 94       | Normal                   | Normal                  | Normal                    | Normal                    | Normal              | Normal              |
| 2702                                                                 | -7       | Normal                   | Normal                  | Normal                    | Normal                    | Normal              | Normal              |
|                                                                      | 1 (4-6H) | Normal                   | Normal                  | Normal                    | Normal                    | Normal              | Normal              |
|                                                                      | 2        | Normal                   | Normal                  | Normal                    | Normal                    | Normal              | Normal              |
|                                                                      | 7 (DE)   | Normal                   | Normal                  | Normal                    | Normal                    | Normal              | Normal              |
|                                                                      | 28 (DE)  | Normal                   | Normal                  | Normal                    | Normal                    | Normal              | Normal              |
|                                                                      | 94       | Normal                   | Normal                  | Normal                    | Normal                    | Normal              | Normal              |

**Appendix 7****Individual Neurological Examinations****5550014**

Sex: Female

| 8.4<br>X10E13<br>vg<br>Group 2      Day(s) Relative to<br>Start Date |          | Neuro (NHP)         |                     |                    |             |
|----------------------------------------------------------------------|----------|---------------------|---------------------|--------------------|-------------|
|                                                                      |          | Flexor<br>Reflex LF | Flexor<br>Reflex RF | Perineal<br>Reflex | Jaw<br>Tone |
| 2701                                                                 | -7       | Normal              | Normal              | Normal             | Normal      |
|                                                                      | 1 (4-6H) | Normal              | Normal              | Normal             | Normal      |
|                                                                      | 2        | Normal              | Normal              | Normal             | Normal      |
|                                                                      | 7 (DE)   | Normal              | Normal              | Normal             | Normal      |
|                                                                      | 28 (DE)  | Normal              | Normal              | Normal             | Normal      |
|                                                                      | 94       | Normal              | Normal              | Normal             | Normal      |
| 2702                                                                 | -7       | Normal              | Normal              | Normal             | Normal      |
|                                                                      | 1 (4-6H) | Normal              | Normal              | Normal             | Normal      |
|                                                                      | 2        | Normal              | Normal              | Normal             | Normal      |
|                                                                      | 7 (DE)   | Normal              | Normal              | Normal             | Normal      |
|                                                                      | 28 (DE)  | Normal              | Normal              | Normal             | Normal      |
|                                                                      | 94       | Normal              | Normal              | Normal             | Normal      |

Sponsor Reference No. UTSW-Gray-SPG50-004

Test Facility Study No. 5550014

**Appendix 7****Individual Neurological Examinations****5550014**

Sex: Female

| 1.68<br>X10E14<br>vg<br>Group 3      Day(s) Relative to<br>Start Date |          | Neuro (NHP)             |                           |                           |                           |                           |                            |
|-----------------------------------------------------------------------|----------|-------------------------|---------------------------|---------------------------|---------------------------|---------------------------|----------------------------|
|                                                                       |          | Gen Att/Mot<br>Function | Proprio Pos<br>L Hindlimb | Proprio Pos<br>R Hindlimb | Placing Reac<br>Visual LH | Placing Reac<br>Visual RH | Placing Reac<br>Tactile LH |
| 3701                                                                  | -7       | Normal                  | Normal                    | Normal                    | Normal                    | Normal                    | Normal                     |
|                                                                       | 1 (4-6H) | Normal                  | Normal                    | Normal                    | Normal                    | Normal                    | Normal                     |
|                                                                       | 2        | Normal                  | Normal                    | Normal                    | Normal                    | Normal                    | Normal                     |
|                                                                       | 7 (DE)   | Normal                  | Normal                    | Normal                    | Normal                    | Normal                    | Normal                     |
|                                                                       | 28 (DE)  | Normal                  | Normal                    | Normal                    | Normal                    | Normal                    | Normal                     |
|                                                                       | 94       | Normal                  | Normal                    | Normal                    | Normal                    | Normal                    | Normal                     |

**Appendix 7****Individual Neurological Examinations****5550014**

Sex: Female

| 1.68<br>X10E14<br>vg<br>Group 3      Day(s) Relative to<br>Start Date |          | Neuro (NHP)                |                  |                   |                  |                      |                       |
|-----------------------------------------------------------------------|----------|----------------------------|------------------|-------------------|------------------|----------------------|-----------------------|
|                                                                       |          | Placing Reac<br>Tactile RH | Head<br>Movement | Pupil<br>Symmetry | Head<br>Symmetry | Eye Position<br>Left | Eye Position<br>Right |
| 3701                                                                  | -7       | Normal                     | Normal           | Normal            | Normal           | Normal               | Normal                |
|                                                                       | 1 (4-6H) | Normal                     | Normal           | Normal            | Normal           | Normal               | Normal                |
|                                                                       | 2        | Normal                     | Normal           | Normal            | Normal           | Normal               | Normal                |
|                                                                       | 7 (DE)   | Normal                     | Normal           | Normal            | Normal           | Normal               | Normal                |
|                                                                       | 28 (DE)  | Normal                     | Normal           | Normal            | Normal           | Normal               | Normal                |
|                                                                       | 94       | Normal                     | Normal           | Normal            | Normal           | Normal               | Normal                |

Sponsor Reference No. UTSW-Gray-SPG50-004

Test Facility Study No. 5550014

**Appendix 7****Individual Neurological Examinations****5550014**

Sex: Female

| 1.68<br>X10E14<br>vg<br>Group 3      Day(s) Relative to<br>Start Date |          | Neuro (NHP)              |                           |                       |                        |                     |                          |
|-----------------------------------------------------------------------|----------|--------------------------|---------------------------|-----------------------|------------------------|---------------------|--------------------------|
|                                                                       |          | Palpebral<br>Reflex Left | Palpebral<br>Reflex Right | Menace<br>Reflex Left | Menace<br>Reflex Right | Head Muscle<br>Tone | Pupillary<br>Light Ref L |
| 3701                                                                  | -7       | Normal                   | Normal                    | Normal                | Normal                 | Normal              | Normal                   |
|                                                                       | 1 (4-6H) | Normal                   | Normal                    | Normal                | Normal                 | Normal              | Normal                   |
|                                                                       | 2        | Normal                   | Normal                    | Normal                | Normal                 | Normal              | Normal                   |
|                                                                       | 7 (DE)   | Normal                   | Normal                    | Normal                | Normal                 | Normal              | Normal                   |
|                                                                       | 28 (DE)  | Normal                   | Normal                    | Normal                | Normal                 | Normal              | Normal                   |
|                                                                       | 94       | Normal                   | Normal                    | Normal                | Normal                 | Normal              | Normal                   |

Sponsor Reference No. UTSW-Gray-SPG50-004

Test Facility Study No. 5550014

**Appendix 7****Individual Neurological Examinations****5550014**

Sex: Female

| 1.68<br>X10E14<br>vg<br>Group 3      Day(s) Relative to<br>Start Date |          | Neuro (NHP)              |                         |                           |                           |                     |                     |
|-----------------------------------------------------------------------|----------|--------------------------|-------------------------|---------------------------|---------------------------|---------------------|---------------------|
|                                                                       |          | Pupillary<br>Light Ref R | Vestibular<br>Nystagmus | Muscle Tone<br>L Hindlimb | Muscle Tone<br>R Hindlimb | Flexor<br>Reflex LH | Flexor<br>Reflex RH |
| 3701                                                                  | -7       | Normal                   | Normal                  | Normal                    | Normal                    | Normal              | Normal              |
|                                                                       | 1 (4-6H) | Normal                   | Normal                  | Normal                    | Normal                    | Normal              | Normal              |
|                                                                       | 2        | Normal                   | Normal                  | Normal                    | Normal                    | Normal              | Normal              |
|                                                                       | 7 (DE)   | Normal                   | Normal                  | Normal                    | Normal                    | Normal              | Normal              |
|                                                                       | 28 (DE)  | Normal                   | Normal                  | Normal                    | Normal                    | Normal              | Normal              |
|                                                                       | 94       | Normal                   | Normal                  | Normal                    | Normal                    | Normal              | Normal              |

Sponsor Reference No. UTSW-Gray-SPG50-004

Test Facility Study No. 5550014

**Appendix 7****Individual Neurological Examinations****5550014**

Sex: Female

| 1.68<br>X10E14<br>vg<br>Group 3      Day(s) Relative to<br>Start Date |          | Neuro (NHP)         |                     |                    |             |
|-----------------------------------------------------------------------|----------|---------------------|---------------------|--------------------|-------------|
|                                                                       |          | Flexor<br>Reflex LF | Flexor<br>Reflex RF | Perineal<br>Reflex | Jaw<br>Tone |
| 3701                                                                  | -7       | Normal              | Normal              | Normal             | Normal      |
|                                                                       | 1 (4-6H) | Normal              | Normal              | Normal             | Normal      |
|                                                                       | 2        | Normal              | Normal              | Normal             | Normal      |
|                                                                       | 7 (DE)   | Normal              | Normal              | Normal             | Normal      |
|                                                                       | 28 (DE)  | Normal              | Normal              | Normal             | Normal      |
|                                                                       | 94       | Normal              | Normal              | Normal             | Normal      |

**Appendix 8**

DocuSign Envelope ID: 6741D4CA-D260-42D8-B645-F9F63978E090

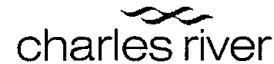

|                                                                                                                                                                                                                                                                                                                   |                                  |                                       |
|-------------------------------------------------------------------------------------------------------------------------------------------------------------------------------------------------------------------------------------------------------------------------------------------------------------------|----------------------------------|---------------------------------------|
| <b>Title:</b><br><b>NEUROLOGICAL ASSESSMENTS - NON-RODENTS</b>                                                                                                                                                                                                                                                    | <b>SOP Number:</b><br>TB08-03-01 | <b>Effective Date:</b><br>28-Apr-2021 |
|                                                                                                                                                                                                                                                                                                                   | <b>Version Number:</b><br>9.0    | <b>Site:</b> CR-SEN/SHB               |
| <b>Management Approval:</b><br>DocuSigned by:<br>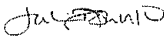<br><b>Signer Name:</b> Julie Douville<br><b>Signing Reason:</b> I approve this document<br><b>Signing Time:</b> 16-Apr-2021   11:40:06 EDT<br>B2DF78DE59474E8493719FA388399F90 |                                  |                                       |

**1.0 Purpose**

To outline the method of evaluating the neurological status of non-rodent animals. Covers the list of possible tests to be performed for an evaluation of the nervous system of dogs, cats, swine and NHP. This SOP could be used as a complete list from which the appropriate tests to be done on a given study can be selected (study specific required tests would be indicated in the Study Plan).

**2.0 Scope**

This SOP applies to all trained personnel performing neurological assessments on non-rodent animals.

**3.0 Responsibilities**

- 3.1 The Toxicology Technician and Clinical Veterinarian staff is responsible for proper execution of this procedure.
- 3.2 The Research Associate / Team Leader (or delegate) is responsible for preparing a master form of Appendix 1 or Appendix 5 (as appropriate) for the tests to be performed for a given study, based on the Study Plan and/or SOP.
- 3.3 The Study Director (or delegate) is responsible for approving the master form that will be used for the data collection on the study.

**4.0 Definitions/ Abbreviations**

NHP: Non-Human Primates

**5.0 Materials****5.1 Required Forms (as appropriate)**

|                                                                                   |                                      |
|-----------------------------------------------------------------------------------|--------------------------------------|
| Appendix 1 - Neurological Assessment Results                                      | Issue Date: 28-Apr-2021 (TB08-03-01) |
| Appendix 2 - Neurological Assessment and Observational Battery Exam Comment Sheet |                                      |
|                                                                                   | Issue Date: 21-Mar-2016 (TB08-03-01) |
| Appendix 5 - Observational Battery – Non-Human Primates                           |                                      |
|                                                                                   | Issue Date: 21-Mar-2016 (TB08-03-01) |
| Appendix 6 - Neurological Assessment – Non-Rodents - Legend                       |                                      |
|                                                                                   | Issue Date: 21-Mar-2016 (TB08-03-01) |

**Appendix 8**

DocuSign Envelope ID: 6741D4CA-D260-42D8-8645-F9F63978E090

|                                                             |                           |                                |
|-------------------------------------------------------------|---------------------------|--------------------------------|
| Title:<br><br><b>NEUROLOGICAL ASSESSMENTS - NON-RODENTS</b> | SOP Number:<br>TB08-03-01 | Effective Date:<br>28-Apr-2021 |
|                                                             | Version Number:<br>9.0    | Site: CR-SEN-SHB               |

**5.2 Required Material**

Gauze  
Forceps  
Light pen  
Rubber neurology hammer  
Provantis PC with computer cart

**6.0 Procedure**

- 6.1 The master form (Appendix 1 or Appendix 5) will be prepared with the Study Number and the tests to be performed for the study. "NE – Not Evaluated" will be entered for the tests that are not applicable or not to be performed. The master form must be approved by the Study Director (or delegate) prior to the first use on study.
- 6.2 The approved master form will be kept in the Raw Data book and will be used to prepare the sheets for the offline recording, or a copy will be given to the technician as a guideline for online recording.
- 6.3 If the neurological assessment is performed offline prior to the randomization, Appendix 1 will be prepared using the animals' Arrival Number. Following the randomization, if the animal is assigned to a study group, the animal number will be added on the form.
- 6.4 When possible, staff performing the neurological assessment should be the same at each occurrence as to reduce variances in scoring.
- 6.5 The result of each test to be performed is recorded in Provantis, on Appendix 1 or Appendix 5 by the Technician or the Clinical Veterinarian. When performed online, a positive entry will be made for all tests; NE - Not Evaluated will be entered for the tests that are not required by the Study Plan or SOP.
- 6.6 Any results scored as abnormal are detailed in a comment in Provantis when performed online, or on Appendix 2 when performed offline. Abbreviations can be used but are restricted to those listed in the Appendix 6 for the identification of tests and sites. The inclusion of these abbreviations in the glossary does not exclude the use of the unabbreviated terms. Comments should also be used to describe what aspect of the result is abnormal, e.g. left or right when a single test is used for both left and right.
- 6.7 For any test where a single score entered represents two observations (e.g. left and right), all observations must be normal to record "1". If one observation is not normal, the appropriate score is entered and a comment entered, identifying the side, limb, etc.
- 6.8 The results are reviewed by the Research Associate / Team Leader (or delegate), the Study Director (or delegate) or the Clinical Veterinarian, or other appropriately trained personnel.
- 6.9 The neurological examination can consist of one or more of the following tests depending on the Study Plan requirements.

**Appendix 8**

DocuSign Envelope ID: 6741D4CA-D260-42D8-8645-F9F63978E090

|                                                         |                           |                                |
|---------------------------------------------------------|---------------------------|--------------------------------|
| Title:<br><b>NEUROLOGICAL ASSESSMENTS - NON-RODENTS</b> | SOP Number:<br>TB08-03-01 | Effective Date:<br>28-Apr-2021 |
|                                                         | Version Number:<br>9.0    | Site: CR-SEN-SHB               |

6.10 Scoring is recorded as per specific test and is defined as follows:

| Scoring |                                     |
|---------|-------------------------------------|
| 1       | Normal                              |
| 2       | Abnormal (details added in comment) |
| 3       | Decreased                           |
| 4       | Increased                           |
| 5       | None                                |
| NE      | Not Evaluated                       |

**7.0 General Attitude and Motor Function (dogs, cats, swine and NHP)**

7.1 Except for NHP which are only examined in their cage, the animal's general behavior and awareness of the environment is assessed in both the cage and the examination area. For the Motor Function, limb movements and position are assessed by reference to their rate, range, force and direction. All steps are recorded as one entry.

| Scoring |                                     |
|---------|-------------------------------------|
| 1       | Normal                              |
| 2       | Abnormal (details added in comment) |
| NE      | Not Evaluated                       |

**8.0 Postural Reactions**

8.1 Proprioceptive Positioning (dogs, cats, swine and NHP (NHP: hindlimbs only))

8.1.1 Each limb is flexed so the dorsal surface of the paw touches a solid horizontal surface (do not put the weight of the animal on the paw). The animal should return its paw to its normal position. The test is performed up to 3 times if required. The most often recorded response will be considered the score for this test. For chair restrained NHP, the test is performed while observing the animal cage side prior to placement in chair, as appropriate.

| Scoring |               |
|---------|---------------|
| 1       | Normal        |
| 3       | Decreased     |
| 5       | None          |
| NE      | Not Evaluated |

**Appendix 8**

DocuSign Envelope ID: 6741D4CA-D260-42D8-8645-F9F63978E090

|                                                         |                           |                                |
|---------------------------------------------------------|---------------------------|--------------------------------|
| Title:<br><b>NEUROLOGICAL ASSESSMENTS - NON-RODENTS</b> | SOP Number:<br>TB08-03-01 | Effective Date:<br>28-Apr-2021 |
|                                                         | Version Number:<br>9.0    | Site: CR-SEN-SHB               |

**8.2 Extensor Thrust (dogs, cats and swine)**

- 8.2.1 The animal is lifted off the ground and then lowered back to the ground, allowing the rear feet to touch the ground first. The animal should extend the limb in an attempt to touch the surface. The test is performed for left and right hindlimbs.

| Scoring |               |
|---------|---------------|
| 1       | Normal        |
| 3       | Decreased     |
| 4       | Increased     |
| NE      | Not Evaluated |

**8.3 Placing Reactions-Visual (dogs, cats, swine and NHP (NHP: hindlimbs only))**

- 8.3.1 The animal is carried toward a table top and observed if it reaches out to support itself as it approaches the table. This is done by supporting all limbs except one (then each limb is tested). For chair restrained NHP, the test is performed while observing the animal cage side prior to placement in chair, as appropriate.

| Scoring |               |
|---------|---------------|
| 1       | Normal        |
| 3       | Decreased     |
| 5       | None          |
| NE      | Not Evaluated |

**8.4 Placing Reactions-Tactile (dogs, cats, swine and NHP (NHP: hindlimbs only; not conducted on chaired NHP))**

- 8.4.1 The same tests as above (step 8.3) are done but the eyes of the animals are covered.

| Scoring |               |
|---------|---------------|
| 1       | Normal        |
| 3       | Decreased     |
| 5       | None          |
| NE      | Not Evaluated |

**8.5 Righting Reaction (dogs, cats and swine)**

- 8.5.1 With the animal placed in a lateral recumbency position, observe the animal's righting ability - this will be scored individually for each lateral aspects of the animal.

| Scoring |               |
|---------|---------------|
| 1       | Normal        |
| 3       | Decreased     |
| 5       | None          |
| NE      | Not Evaluated |

**Appendix 8**

DocuSign Envelope ID: 6741D4CA-D260-42D8-8645-F9F63978E090

|                                                         |                           |                                |
|---------------------------------------------------------|---------------------------|--------------------------------|
| Title:<br><b>NEUROLOGICAL ASSESSMENTS - NON-RODENTS</b> | SOP Number:<br>TB08-03-01 | Effective Date:<br>28-Apr-2021 |
|                                                         | Version Number:<br>9.0    | Site: CR-SEN-SHB               |

**8.6 Eye Tracking (dogs, 5 weeks and older)**

8.6.1 In a normal standing position, the eyes should track an object with head movement.

| Scoring |                                                        |
|---------|--------------------------------------------------------|
| 1       | Normal (gaze pursuit with head movement)               |
| 5       | None (does not follow target, unable to get attention) |
| NE      | Not Evaluated                                          |

**9.0 Cranial Nerves****9.1 Head Movement (dogs, cats, swine and NHP)**

9.1.1 Observe the head for any evidence of head tilt, or involuntary movements.

| Scoring |                                       |
|---------|---------------------------------------|
| 1       | Normal                                |
| 2       | Abnormal (details added in a comment) |
| NE      | Not Evaluated                         |

**9.2 Head Symmetry (dogs, cats, swine and NHP)**

9.2.1 Observe the head for any evidence of facial muscle asymmetry.

| Scoring |                                     |
|---------|-------------------------------------|
| 1       | Normal                              |
| 2       | Abnormal (details added in comment) |
| NE      | Not Evaluated                       |

**9.3 Head Muscle Tone (dogs, cats, swine and NHP (not conducted on chaired NHP))**

9.3.1 Palpate the muscles of the head for tone and/or atrophy.

| Scoring |               |
|---------|---------------|
| 1       | Normal        |
| 3       | Decreased     |
| 4       | Increased     |
| 5       | None          |
| NE      | Not Evaluated |

**Appendix 8**

DocuSign Envelope ID: 6741D4CA-D260-42D8-8645-F9F63978E090

|                                                         |                           |                                |
|---------------------------------------------------------|---------------------------|--------------------------------|
| Title:<br><b>NEUROLOGICAL ASSESSMENTS - NON-RODENTS</b> | SOP Number:<br>TB08-03-01 | Effective Date:<br>28-Apr-2021 |
|                                                         | Version Number:<br>9.0    | Site: CR-SEN-SHB               |

- 9.4 Menace Reflex (Eye Reactions) (dogs, cats, swine and NHP). For chaired NHP, the test is done for both eyes at once using one hand.

- 9.4.1 With one eye of the animal covered, threaten the opposite eye with a menacing gesture of the hand, being careful to avoid striking the animal or stimulating the area with air currents, test each side. The animal should close its eye.

| Scoring |               |
|---------|---------------|
| 1       | Normal        |
| 3       | Decreased     |
| 4       | Increased     |
| 5       | None          |
| NE      | Not Evaluated |

- 9.5 Jaw Tone (dogs, cats and NHP)

- 9.5.1 Palpate the muscles of the jaw for tone and/or atrophy. This can also be done via observation of mastication and/or vocalization.

| Scoring |               |
|---------|---------------|
| 1       | Normal        |
| 3       | Decreased     |
| 4       | Increased     |
| 5       | None          |
| NE      | Not Evaluated |

- 9.6 Pupil Symmetry (dogs, cats, swine and NHP)

- 9.6.1 Observe the symmetry of the pupil's position.

| Scoring |                                     |
|---------|-------------------------------------|
| 1       | Normal                              |
| 2       | Abnormal (details added in comment) |
| NE      | Not Evaluated                       |

- 9.7 Eye Position (dogs, cats, swine and NHP (not conducted on chaired NHP))

- 9.7.1 The nose will be elevated when the animal is in the normal standing position. The eyes should remain in the middle of the palpebral fissure.

| Scoring |                                     |
|---------|-------------------------------------|
| 1       | Normal                              |
| 2       | Abnormal (details added in comment) |
| NE      | Not Evaluated                       |

**Appendix 8**

DocuSign Envelope ID: 6741D4CA-D260-42D8-8645-F9F63978E090

|                                                         |                           |                                |
|---------------------------------------------------------|---------------------------|--------------------------------|
| Title:<br><b>NEUROLOGICAL ASSESSMENTS - NON-RODENTS</b> | SOP Number:<br>TB08-03-01 | Effective Date:<br>28-Apr-2021 |
|                                                         | Version Number:<br>9.0    | Site: CR-SEN-SHB               |

## 9.8 Palpebral Reflex (dogs, cats, swine and NHP (not conducted on chaired NHP))

- 9.8.1 The periphery of the cornea will be gently touched with the edge of a clean gauze pad for each animal. The animal should blink its eyelids including the nictitating membrane if applicable.

| Scoring |               |
|---------|---------------|
| 1       | Normal        |
| 3       | Decreased     |
| 5       | None          |
| NE      | Not Evaluated |

## 9.9 Pupillary Light Reflex (dogs, cats, swine and NHP (not conducted on chaired NHP))

- 9.9.1 In a dimly lit room, if possible, a bright focal light source will be directed from the temporal or lateral aspect of the eye through the pupil towards the retina.
- The direct light reflex will consist of observing the pupil for degree, speed and symmetry of constriction.
- 9.9.2 Each eye will be checked for the direct reflex.
- 9.9.3 In a normally lit room, the response may be tested by shading both eyes with the hand prior to exposure to the focal light source. The activity is entered as a single score.

| Scoring |                                     |
|---------|-------------------------------------|
| 1       | Normal                              |
| 2       | Abnormal (details added in comment) |
| 5       | None                                |
| NE      | Not Evaluated                       |

## 9.10 Vestibular Nystagmus (dogs, cats, swine and NHP (not conducted on chaired NHP))

- Move the head from side to side to generate normal vestibular nystagmus. The eyes should follow the direction of the head in sudden movements.

| Scoring |                                     |
|---------|-------------------------------------|
| 1       | Normal                              |
| 2       | Abnormal (details added in comment) |
| NE      | Not Evaluated                       |

**Appendix 8**

DocuSign Envelope ID: 6741D4CA-D260-42D8-8645-F9F63978E090

|                                                         |                           |                                |
|---------------------------------------------------------|---------------------------|--------------------------------|
| Title:<br><b>NEUROLOGICAL ASSESSMENTS - NON-RODENTS</b> | SOP Number:<br>TB08-03-01 | Effective Date:<br>28-Apr-2021 |
|                                                         | Version Number:<br>9.0    | Site: CR-SEN-SHB               |

**10.0 Spinal Nerves**

## 10.1 Muscle Tone (dogs, cats, swine and NHP (NHP: hindlimbs only))

10.1.1 Using gentle manipulation of each limb, the degree of resistance is determined. A normal animal should have a slight resistance.

| Scoring |               |
|---------|---------------|
| 1       | Normal        |
| 3       | Decreased     |
| 4       | Increased     |
| 5       | None          |
| NE      | Not Evaluated |

## 10.2 Patellar Reflexes (dogs, cats and swine)

10.2.1 With the animal in a relaxed position (lateral recumbency for cats and dogs) place the upper hindlimb in a semi flexed position. The patellar tendon below the knee is lightly tapped with a rubber neurology hammer. The stifle joint should quickly extend.

| Scoring |               |
|---------|---------------|
| 1       | Normal        |
| 3       | Decreased     |
| 4       | Increased     |
| 5       | None          |
| NE      | Not Evaluated |

## 10.3 Flexor Reflex (dogs, cats, swine and NHP (chaired NHP: hindlimbs only))

10.3.1 The base of the nail (one) of each limb is quickly and lightly pinched with a haemostat. The animal should react with motion or retract its limb.

| Scoring |               |
|---------|---------------|
| 1       | Normal        |
| 3       | Decreased     |
| 4       | Increased     |
| 5       | None          |
| NE      | Not Evaluated |

**Appendix 8**

DocuSign Envelope ID: 6741D4CA-D260-42D8-8645-F9F63978E090

|                                                         |                           |                                |
|---------------------------------------------------------|---------------------------|--------------------------------|
| Title:<br><b>NEUROLOGICAL ASSESSMENTS - NON-RODENTS</b> | SOP Number:<br>TB08-03-01 | Effective Date:<br>28-Apr-2021 |
|                                                         | Version Number:<br>9.0    | Site: CR-SEN-SHB               |

**10.4 Panniculus Reflex (dogs, cats and swine)**

- 10.4.1 Starting in the cranial region of the thorax and going caudally, gently stimulate the different areas of the skin with a forcep. The cutaneous trunci muscle should contract making the skin of the area move. The evaluations will be performed for each side of the body (right and left). A single score is entered for both assessments.

| Scoring |                                     |
|---------|-------------------------------------|
| 1       | Normal                              |
| 2       | Abnormal (details added in comment) |
| NE      | Not Evaluated                       |

**10.5 Perineal Reflex (dogs, cats, swine and NHP)**

- 10.5.1 The anus is gently stimulated with a forcep. The normal reflex will make the anal sphincter contract and/or the tail flex.

| Scoring |               |
|---------|---------------|
| 1       | Normal        |
| 5       | None          |
| NE      | Not Evaluated |

**11.0 Additional Optional Assessments**

Note:

- The following assessments are additional assessments when required by Study Plan.

**11.1 Postural Reactions****11.1.1 Hemihopping and Hemistanding (dogs, cats and swine)**

- The limbs on one side are held off the ground while the animal is forced to walk sideways on its two remaining limbs. A normal animal should maintain itself straight. Both sides are tested. A single score is entered for both sides.

| Scoring |               |
|---------|---------------|
| 1       | Normal        |
| 3       | Decreased     |
| 5       | None          |
| NE      | Not Evaluated |

**Appendix 8**

DocuSign Envelope ID: 6741D4CA-D260-42D8-8645-F9F63978E090

|                                                         |                           |                                |
|---------------------------------------------------------|---------------------------|--------------------------------|
| Title:<br><b>NEUROLOGICAL ASSESSMENTS - NON-RODENTS</b> | SOP Number:<br>TB08-03-01 | Effective Date:<br>28-Apr-2021 |
|                                                         | Version Number:<br>9.0    | Site: CR-SEN-SHB               |

## 11.1.2 Wheel Barrowing (dogs, cats and swine)

- Thoracic or pelvic limbs are held off the ground while the animal is moved forwards (holding pelvic limbs) and then backwards (holding thoracic limbs) on its two remaining limbs. A normal animal should support itself during the test. A single score is entered for both tests.

| Scoring |               |
|---------|---------------|
| 1       | Normal        |
| 3       | Decreased     |
| 5       | None          |
| NE      | Not Evaluated |

## 11.1.3 Hopping (dogs, cats and swine)

- All limbs except one are supported, making the animal hop on that limb. A normal animal should support itself on its limb. A single score is entered for all limbs.

| Scoring |               |
|---------|---------------|
| 1       | Normal        |
| 3       | Decreased     |
| 5       | None          |
| NE      | Not Evaluated |

## 11.2 Cranial Nerves

## 11.2.1 Tongue Test (dogs, cats and swine)

- Pull the tongue and observe its size (symmetry), movement and strength.

| Scoring |                                     |
|---------|-------------------------------------|
| 1       | Normal                              |
| 2       | Abnormal (details added in comment) |
| NE      | Not Evaluated                       |

## 11.2.2 Pharynx Test (dogs, cats and swine)

- Probe the pharynx with a finger and verify if animal is able to swallow or gag.

| Scoring |               |
|---------|---------------|
| 1       | Normal        |
| 3       | Decreased     |
| 5       | None          |
| NE      | Not Evaluated |

**Appendix 8**

DocuSign Envelope ID: 6741D4CA-D260-42D8-8645-F9F63978E090

|                                                         |                           |                                |
|---------------------------------------------------------|---------------------------|--------------------------------|
| Title:<br><b>NEUROLOGICAL ASSESSMENTS - NON-RODENTS</b> | SOP Number:<br>TB08-03-01 | Effective Date:<br>28-Apr-2021 |
|                                                         | Version Number:<br>9.0    | Site: CR-SEN-SHB               |

**12.0 Non-Human Primate Specific Battery****12.1 General Notes**

- 12.1.1 When possible, staff performing the observational battery should be the same at each occurrence as to reduce variance in response by the animal and in scoring. The testing Technician should be blind to the study groups and not be familiar with study animals in order to not be biased.
- 12.1.2 The animal cage card indicating the study group number will be removed and replaced with the animal arrival number. The study Team Leader or delegate will fill in the animal study number on Appendix 1 once the evaluation is completed.
- 12.1.3 Observations will occur in random order throughout the room.
- 12.1.4 During the evaluation, outside disturbances should be kept to a minimum. It is recommended to post a door sheet stating "Testing in Progress". In addition, the room door windows should be covered in order to minimize disturbances.
- 12.1.5 The observational battery, (OB) should be performed between 1-3 hours post feeding.
- 12.1.6 Animal separation (if not already performed) and cage tray rinse is performed a minimum of 30 minutes prior to observations. The cage/room wash should not be performed within 2 hours before observations. Should excessive cage or self-licking be observed, indicate the time of the tray or cage wash on the appropriate Appendix.
- 12.1.7 The results are recorded on the appropriate Appendix by the Technician or the Clinical Veterinarian. Values in parentheses represent "Normal" or "None".
- 12.1.8 When the letter "C" is entered as a value or is separated by a comma after a score, and a check (✓) is made in the Comments box, the details of the observation will be recorded on the Comment Sheet (Appendix 2). Otherwise if only, a check (✓) is placed in the comment section this will indicate a general comment. In the "Test" column of the appendix, indicate the test number as found in the SOP. E.g. Arousal level = 7.4. If a comment is not test specific, the Test box is to be crossed out.

**12.2 Body Position**

| Scoring |                               |
|---------|-------------------------------|
| 1       | Lying down - Sternal          |
| 2       | Lying down - Lateral          |
| 3       | Sitting                       |
| 4       | Quadrupedal standing          |
| 5       | Hanging or bipedal standing   |
| 6       | Climbing                      |
| 7       | Hunched posture               |
| C       | Other: refer to Comment sheet |

**Appendix 8**

DocuSign Envelope ID: 6741D4CA-D260-42D8-8645-F9F63978E090

|                                                         |                           |                                |
|---------------------------------------------------------|---------------------------|--------------------------------|
| Title:<br><b>NEUROLOGICAL ASSESSMENTS - NON-RODENTS</b> | SOP Number:<br>TB08-03-01 | Effective Date:<br>28-Apr-2021 |
|                                                         | Version Number:<br>9.0    | Site: CR-SEN-SHB               |

## 12.3 Arousal level

| Scoring |                               |
|---------|-------------------------------|
| 1       | None: resting or sleeping     |
| 2       | Slight movement               |
| 0       | Normal movement               |
| 3       | Vigorous, constant movement   |
| 4       | Sudden, erratic movement      |
| C       | Other: refer to Comment sheet |

## 12.4 Locomotion

12.4.1 In the case where the animal has not moved during the observation period, the Technician is to stimulate the animal to move in order to assess locomotion. The locomotion is scored as follows (e.g.: S1).

| Scoring |                                                             |
|---------|-------------------------------------------------------------|
| 0       | Normal                                                      |
| 1       | Abnormal gait                                               |
| 2       | Limited usage of limb(s) (indicate limb(s)): LF, RF, LH, RH |
| 3       | Animal did not move                                         |
| S       | Animal stimulated to move                                   |

## 12.5 Tremors: involuntary trembling motions of body, head or limbs

| Scoring |                                             |
|---------|---------------------------------------------|
| 0       | None                                        |
| 1       | Slight                                      |
| 2       | Moderate                                    |
| 3       | Severe                                      |
| B       | Body                                        |
| H       | Head                                        |
| L*      | Limb (s) (*indicate limb(s)) LF, RF, LH, RH |

## 12.6 Twitches: sudden involuntary jerk of limbs

| Scoring |          |
|---------|----------|
| 0       | None     |
| 1       | Slight   |
| 2       | Moderate |
| 3       | Severe   |

**Appendix 8**

DocuSign Envelope ID: 6741D4CA-D260-42D8-8645-F9F63978E090

|                                                         |                           |                                |
|---------------------------------------------------------|---------------------------|--------------------------------|
| Title:<br><b>NEUROLOGICAL ASSESSMENTS - NON-RODENTS</b> | SOP Number:<br>TB08-03-01 | Effective Date:<br>28-Apr-2021 |
|                                                         | Version Number:<br>9.0    | Site: CR-SEN-SHB               |

## 12.7 Convulsions

| Scoring                                                                                     |                                                                                  |
|---------------------------------------------------------------------------------------------|----------------------------------------------------------------------------------|
| 0                                                                                           | None                                                                             |
| <b>Clonic-Type convulsions:</b> persistent contractions and relaxation of voluntary muscles |                                                                                  |
| CL                                                                                          | Clonic: a violent contraction and relaxation of muscles of the head and/or limbs |
| CH                                                                                          | Chomping: clonus of jaws, "chewing" motion                                       |
| <b>Tonic-Type convulsions:</b> persistent contraction of voluntary muscles                  |                                                                                  |
| T                                                                                           | Tonic: sustained extension of limbs                                              |
| OP                                                                                          | Opisthotonos: head and body arched backwards                                     |
| EM                                                                                          | Emprostotonos: head and body extended forward                                    |

**Appendix 8**

DocuSign Envelope ID: 6741D4CA-D260-42D8-8645-F9F63978E090

|                                                         |                           |                                |
|---------------------------------------------------------|---------------------------|--------------------------------|
| Title:<br><b>NEUROLOGICAL ASSESSMENTS - NON-RODENTS</b> | SOP Number:<br>TB08-03-01 | Effective Date:<br>28-Apr-2021 |
|                                                         | Version Number:<br>9.0    | Site: CR-SEN-SHB               |

**12.8 Bizarre/Stereotypic Behavior****12.8.1 Additional detail or clarification may be provided in the Comments (Appendix 2)**

| Scoring                                            |                                                                           |
|----------------------------------------------------|---------------------------------------------------------------------------|
| 0                                                  | None                                                                      |
| <b>If present, record description and severity</b> |                                                                           |
| L                                                  | Compulsive licking                                                        |
| R                                                  | Retropulsion: backward walking                                            |
| P                                                  | Polidipsia (excessive drinking)                                           |
| BO                                                 | Biting objects: frequently bites objects or cage                          |
| CG                                                 | Circling                                                                  |
| EP                                                 | Eye poking                                                                |
| HG                                                 | Hand/Foot gesture, holding or maintaining hand/foot in an atypical manner |
| HS                                                 | Head search: stereotypic turning from side to side                        |
| SB                                                 | Self-biting: bites limbs or body                                          |
| SP                                                 | Stereotypic pacing                                                        |
| SW                                                 | Staring at cage wall, self or other object                                |
| C                                                  | Other: description recorded on Comment sheet                              |
| <b>Severity</b>                                    |                                                                           |
| 1                                                  | Slight (occasional)                                                       |
| 2                                                  | Moderate (about half the time of observation)                             |
| 3                                                  | Severe (over half the time of the observation)                            |

**12.8.2 Facial Observations**

| Scoring |              |
|---------|--------------|
| 1       | Symmetrical  |
| 2       | Asymmetrical |

**12.9 Vocalization**

| Scoring |                                                   |
|---------|---------------------------------------------------|
| 0       | None                                              |
| 1       | Slight (Less than half the time of observation)   |
| 2       | Moderate (More than half the time of observation) |
| 3       | Severe (Non-stop during observation)              |

**12.10 Palpebral Closure**

| Scoring |                         |
|---------|-------------------------|
| 0       | Normal (both eyes open) |
| 1       | ½ closed                |
| 2       | Completely closed       |

**Appendix 8**

DocuSign Envelope ID: 6741D4CA-D260-42D8-8645-F9F63978E090

|                                                         |                           |                                |
|---------------------------------------------------------|---------------------------|--------------------------------|
| Title:<br><b>NEUROLOGICAL ASSESSMENTS - NON-RODENTS</b> | SOP Number:<br>TB08-03-01 | Effective Date:<br>28-Apr-2021 |
|                                                         | Version Number:<br>9.0    | Site: CR-SEN-SHB               |

## 12.11 Respiratory Rate/Pattern

| Scoring |                 |
|---------|-----------------|
| 0       | Normal          |
| 1       | Decreased       |
| 2       | Increased       |
| L       | Labored         |
| D       | Dyspneic        |
| G       | Gasping         |
| A       | Abnormal sounds |

## 12.12 Vomiting: Must see animal vomit

| Scoring |                                |
|---------|--------------------------------|
| 0       | None                           |
| R       | Retching                       |
| #       | Record number of times vomited |
| M       | Material in tray               |

## 12.13 Defecation: Must see animal defecate

| Scoring |                         |
|---------|-------------------------|
| 0       | None                    |
| #       | Record number of stools |
| D       | Diarrhea                |
| M       | Material in tray        |

## 12.14 Urination: Must see animal urinate

| Scoring |                  |
|---------|------------------|
| 0       | None             |
| 1       | Normal urination |
| 2       | Severe/Polyuria  |

## 12.15 Lacrimation

| Scoring |                     |
|---------|---------------------|
| 0       | None                |
| 1       | Present (both eyes) |
| 2       | Left eye only       |
| 3       | Right eye only      |

**Appendix 8**

DocuSign Envelope ID: 6741D4CA-D260-42D8-B645-F9F63978E090

|                                                         |                           |                                |
|---------------------------------------------------------|---------------------------|--------------------------------|
| Title:<br><b>NEUROLOGICAL ASSESSMENTS - NON-RODENTS</b> | SOP Number:<br>TB08-03-01 | Effective Date:<br>28-Apr-2021 |
|                                                         | Version Number:<br>9.0    | Site: CR-SEN-SHB               |

## 12.16 Salivation

| Scoring |          |
|---------|----------|
| 0       | None     |
| 1       | Slight   |
| 2       | Moderate |
| 3       | Severe   |

**13.0 References**

N/A

**14.0 Revision History**

| Version | Date        | Reason For Revision                                                                                                                                                                                                                                                                                                     |
|---------|-------------|-------------------------------------------------------------------------------------------------------------------------------------------------------------------------------------------------------------------------------------------------------------------------------------------------------------------------|
| 9.0     | 28-Apr-2021 | Section 6.0 clarified to indicate that a master form needs to be approved at the beginning of the study.<br>Minor typographical/formatting fixed throughout the document.<br>Section 9.10 added Vestibular Nystagmus (and removed from Section 11.2.1)<br>Appendix 1 Vestibular Nystagmus added as a default parameter. |

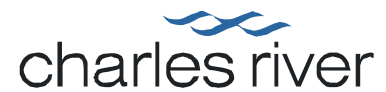

**FINAL REPORT**

**Study Phase: Nerve Conduction Velocity**

**Test Facility Study No. 5550014**

**Sponsor Reference No. UTSW-Gray-SPG50-004**

**GLP**

**TEST FACILITY:**

Charles River Laboratories Montreal ULC  
Senneville Site (CR-SEN)

**Appendix 9**

**TABLE OF CONTENTS**

|                                            |   |
|--------------------------------------------|---|
| LIST OF APPENDICES.....                    | 3 |
| 1. INTRODUCTION .....                      | 4 |
| 2. MATERIALS AND METHODS.....              | 4 |
| 2.1. Experimental Design.....              | 4 |
| 2.2. Nerve Conduction Velocity (NCV) ..... | 4 |
| 2.3. Systems .....                         | 4 |
| 2.4. Statistical Analysis.....             | 5 |
| 3. RESULTS AND DISCUSSION .....            | 5 |
| 4. CONCLUSION.....                         | 8 |
| 5. REPORT APPROVAL .....                   | 9 |

**Appendix 9**

**LIST OF APPENDICES**

|            |                                                                 |    |
|------------|-----------------------------------------------------------------|----|
| Appendix 1 | Individual and Summary of Nerve Conduction Velocity (NCV) ..... | 11 |
|------------|-----------------------------------------------------------------|----|

**Appendix 9****1. INTRODUCTION**

This report presents the nerve conduction velocity summary findings in monkeys assigned to Study No. 5550014: *A Single-Dose Study of AAV9/AP4M1 by Intrathecal Injection in Immunosuppressed Monkeys*. The objectives of this study were to determine the potential toxicity, biodistribution, and gene expression of AAV9/AP4M1, for the treatment of Spastic Paraplegia Type 50 (SPG50) caused by the AP4M1 gene mutation, when given by a single intrathecal injection to monkeys, to evaluate the potential reversibility and/or progression of any findings, and to determine the potential impact of immunosuppressant (IMS) on the toxicity profile of this AAV9 vector.

For the work detailed in this report, the phase start date was 05 Jul 2021, and the phase completion date was 12 Oct 2021.

**2. MATERIALS AND METHODS****2.1. Experimental Design**

Experimental design applicable to nerve conduction velocity evaluations are summarized in [Text Table 1](#).

Text Table 1  
Experimental Design

| Group No. | Test Material  | Dose Level (vg)       | Dose Volume (mL) | Dose Concentration (vg/mL) | Animal Nos. |           |
|-----------|----------------|-----------------------|------------------|----------------------------|-------------|-----------|
|           |                |                       |                  |                            | Main Study  |           |
|           |                |                       |                  |                            | Males       | Females   |
| 1         | Reference Item | 0                     | 1                | 0                          | 1201        | 1701      |
| 2         | AAV9/AP4M1     | $8.4 \times 10^{13}$  | 1.55             | $5.43 \times 10^{13}$      | -           | 2701-2702 |
| 3         | AAV9/AP4M1     | $1.68 \times 10^{14}$ | 3.10             | $5.43 \times 10^{13}$      | 3201        | 3701      |

**2.2. Nerve Conduction Velocity (NCV)**

Frequency: Once prestudy and on Days 45, 77, and 92.

Anesthesia: An intramuscular injection of ketamine, glycopyrrolate and dexmedetomidine was administered following an appropriate fasting period. Following the completion of the assessment, a reversal agent, atipamezole, was administered.

Evaluation: Peroneal motor: NCV and Amplitude  
Sural sensory: NCV and Amplitude  
Cauda equina: Onset latency

**2.3. Systems**

Critical computerized systems used in this study phase are listed below.

**Appendix 9**

Text Table 2  
Computerized Systems

| System Name         | Version No. | Description of Data Collected and/or Analyzed |
|---------------------|-------------|-----------------------------------------------|
| <i>AcqKnowledge</i> | 4.4         | Electrophysiological recording                |
| Excel               | 2016        | Tabulated data entry                          |

**2.4. Statistical Analysis**

The data was presented as individual and mean values along with standard deviation for each measurement.

**3. RESULTS AND DISCUSSION**

Prior to initiation of dosing, all measurements for the peroneal motor nerve, sural sensory nerve and the cauda equina were comparable with concurrent control assessments.

Following a single intrathecal administration of AAV9/AP4M1 at  $8.4 \times 10^{13}$  and  $1.68 \times 10^{14}$  vg, no changes in peroneal nerve conduction velocity or amplitude and no changes in the onset latency of the cauda equina were noted up to Day 92. In addition, there were no changes in conduction velocity or amplitude for the sural nerve at  $8.4 \times 10^{13}$  vg. All measurements were comparable to the concurrent control.

Intrathecal administration of AAV9/AP4M1 at  $1.68 \times 10^{14}$  vg resulted in a slight decrease in sural nerve conduction velocity of 11% on Day 45, relative to the control group, accompanied by a decrease in response amplitude of 27%. Animal no. 3201 exhibited the most significant change with nerve conduction velocity of 44 m/sec compared to 52 m/sec in control animals.

Intrathecal administration of AAV9/AP4M1 at  $1.68 \times 10^{14}$  vg resulted in significant decreases in sural nerve conduction velocity of 26% on Day 77 and of 28% on Day 92, relative to control. The changes in conduction velocity were accompanied by associated decreases in sural nerve response amplitude which was reduced by 69% on Day 77 and by 74% on Day 92.

Animal no. 3201 was the most impacted animal exhibiting the most pronounced changes with nerve conduction velocity of 34 m/sec (35% change relative to control) on Day 77 and 32 m/sec (39% change relative to control) on Day 92 compared to 52-53 m/sec in control animals. The most pronounced decrease in response amplitude was also noted in Animal no. 3201, especially on Day 92, during which an amplitude of 1.2  $\mu$ V was noted compared to a mean amplitude of 10.2  $\mu$ V in control animals.

The changes in sural nerve conduction velocity are presented in figures below:

**Appendix 9**

Text Figures 1-6  
Individual Sural Nerve Conduction Velocity across occasions

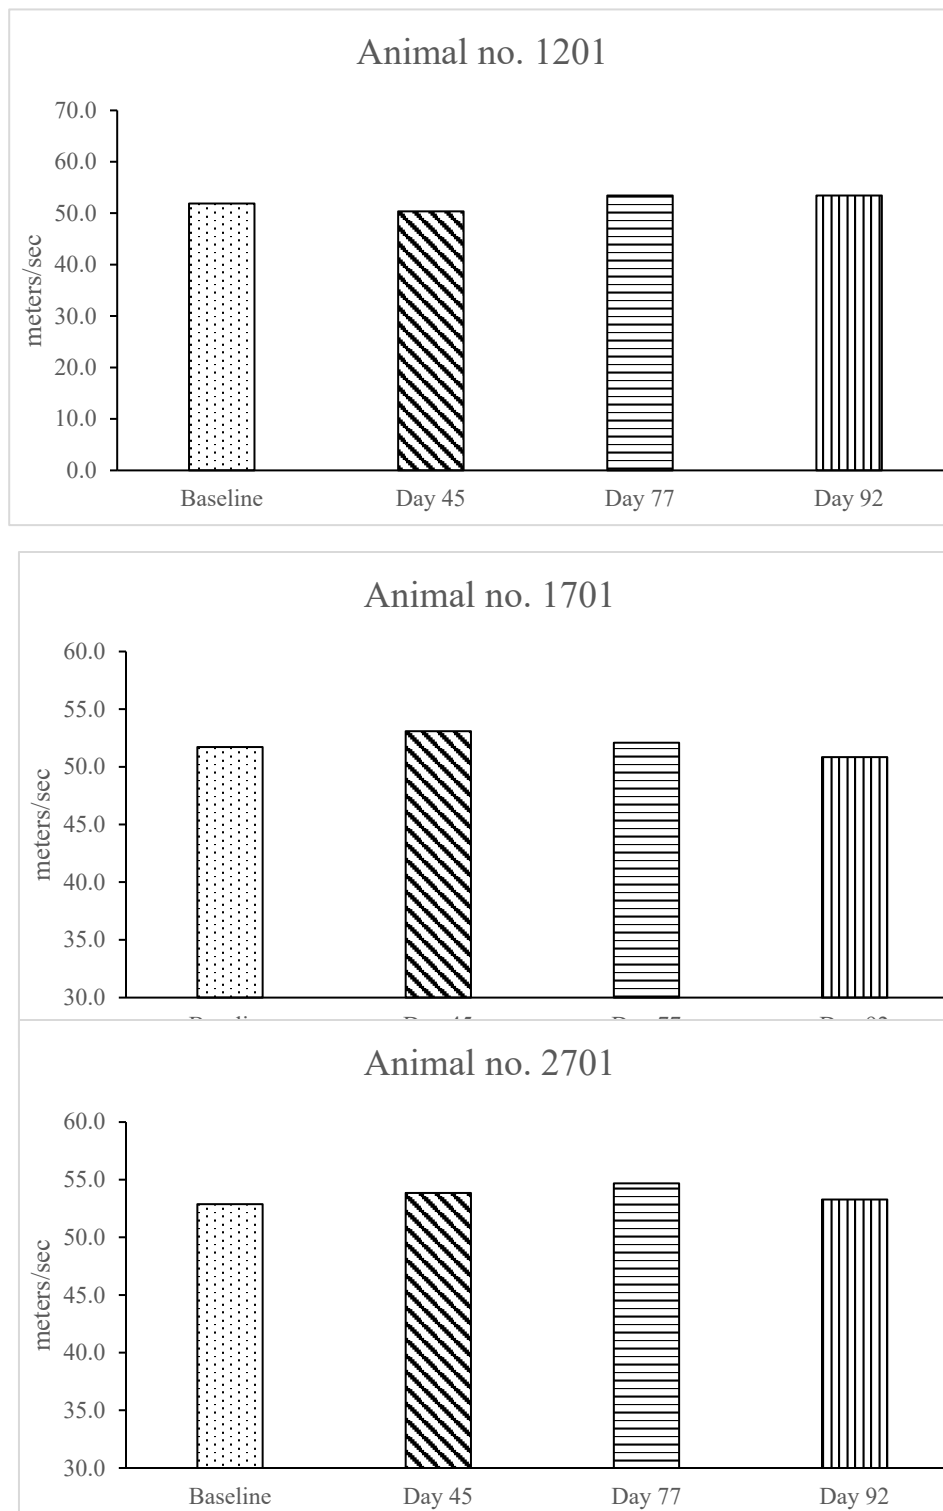

**Appendix 9**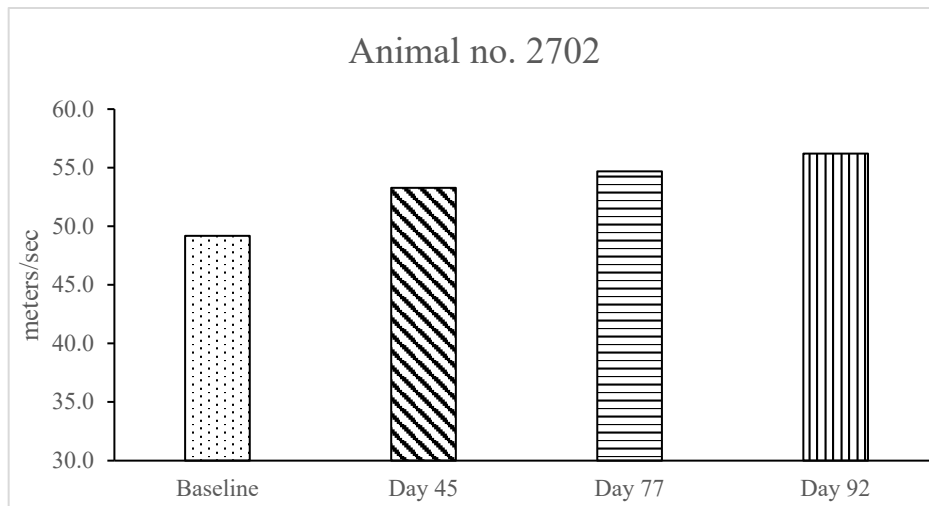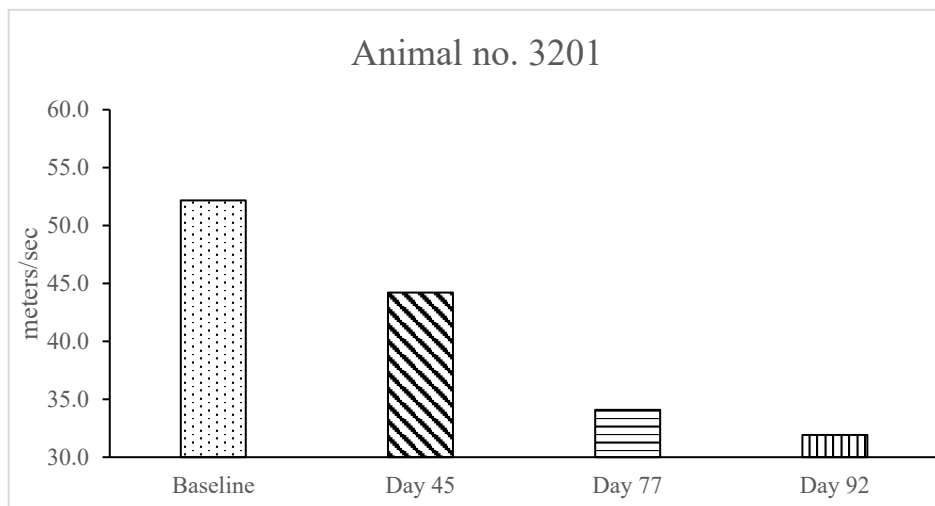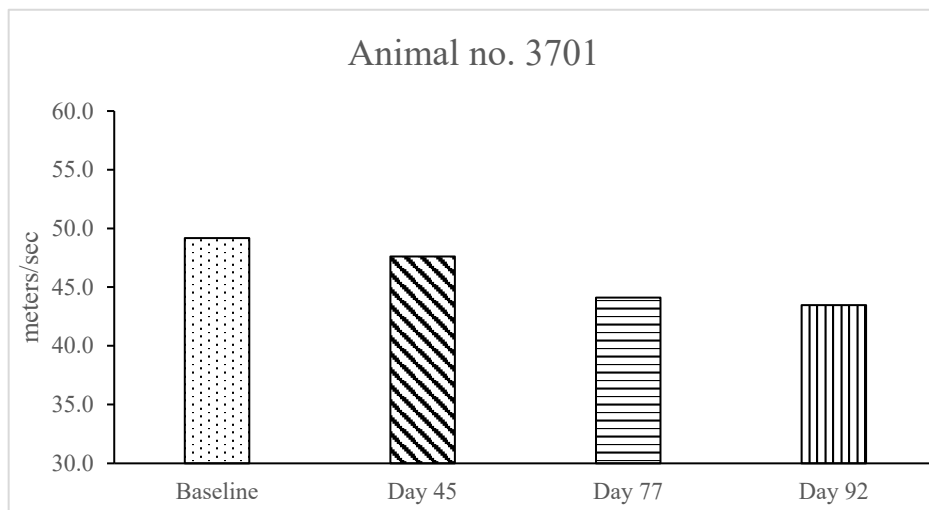

**Appendix 9****4. CONCLUSION**

Intrathecal administration of AAV9/AP4M1 at  $1.68 \times 10^{14}$  vg resulted in a decrease in nerve conduction velocity and response amplitude of the sural nerve on Day 45, 77 and 92 with no deficits noted in peroneal or cauda equina nerves. Intrathecal administration of AAV9/AP4M1 at  $8.4 \times 10^{13}$  vg resulted in no deficits in any of the nerves assessed.

**Appendix 9**

**5. REPORT APPROVAL**

All electronic signatures appear at the end of the document upon finalization.

**Appendix 9****Individual Nerve Conduction Velocity (NCV) Explanation Page**

| Abbreviation | Description                        | Abbreviation | Description        |
|--------------|------------------------------------|--------------|--------------------|
| ./-          | Not scheduled to be performed/dead | M            | Male               |
| Diff         | Difference                         | NR           | Not recorded       |
| F            | Female                             | Temp         | Temperature        |
| Lat          | Latency                            | X            | Excluded from mean |

Note: This is a comprehensive list of abbreviations. All of the abbreviations listed may not be applicable to this report.

**Dosing Information**

Dosing information is abbreviated on various data outputs; the following represents the dosing information for this study.

| Group No. | Test Material  | Dose Level (vg)       |
|-----------|----------------|-----------------------|
| 1         | Reference Item | 0                     |
| 2         | AAV9/AP4M1     | $8.4 \times 10^{13}$  |
| 3         | AAV9/AP4M1     | $1.68 \times 10^{14}$ |

**Appendix 9****Appendix 1****Individual and Summary of Nerve Conduction Velocity (NCV)**

Prestudy

| Group 1           | Peroneal Motor Response - Left |                               |                             |                             |      |                  |                | Sural Nerve Response - Left |                         |                  |                | Cauda Equina               | Temp                    |
|-------------------|--------------------------------|-------------------------------|-----------------------------|-----------------------------|------|------------------|----------------|-----------------------------|-------------------------|------------------|----------------|----------------------------|-------------------------|
| Animal ID/<br>Sex | Proximal<br>on. Lat<br>(msec)  | Proximal<br>Amplitude<br>(mV) | Distal<br>on. Lat<br>(msec) | Distal<br>Amplitude<br>(mV) | Diff | Distance<br>(mm) | NCV<br>(m/sec) | Onset<br>Latency<br>(msec)  | Amplitude<br>( $\mu$ V) | Distance<br>(mm) | NCV<br>(m/sec) | Onset<br>Latency<br>(msec) | Temp<br>( $^{\circ}$ C) |
| 1201 M            | 4.5                            | 17.8                          | 2.8                         | 16.9                        | 1.7  | 110              | 65.7           | 1.1                         | 23.6                    | 55               | 51.9           | 2.8                        | 37.0                    |
| 1701 F            | 5.1                            | 20.3                          | 3.3                         | 19.5                        | 1.8  | 105              | 57.5           | 1.2                         | 10.7                    | 60               | 51.7           | 2.9                        | 36.2                    |
| Mean              | 4.8                            | 19.0                          | 3.0                         | 18.2                        | 1.8  | 107.5            | 61.6           | 1.1                         | 17.2                    | 57.5             | 51.8           | 2.8                        | 36.6                    |
| SD                | 0.5                            | 1.7                           | 0.4                         | 1.9                         | 0.1  | 3.5              | 5.8            | 0.1                         | 9.1                     | 3.5              | 0.1            | 0.1                        | 0.6                     |
| N                 | 2                              | 2                             | 2                           | 2                           | 2    | 2                | 2              | 2                           | 2                       | 2                | 2              | 2                          | 2                       |

| Group 2           | Peroneal Motor Response - Left |                               |                             |                             |      |                  |                | Sural Nerve Response - Left |                         |                  |                | Cauda Equina               | Temp                    |
|-------------------|--------------------------------|-------------------------------|-----------------------------|-----------------------------|------|------------------|----------------|-----------------------------|-------------------------|------------------|----------------|----------------------------|-------------------------|
| Animal ID/<br>Sex | Proximal<br>on. Lat<br>(msec)  | Proximal<br>Amplitude<br>(mV) | Distal<br>on. Lat<br>(msec) | Distal<br>Amplitude<br>(mV) | Diff | Distance<br>(mm) | NCV<br>(m/sec) | Onset<br>Latency<br>(msec)  | Amplitude<br>( $\mu$ V) | Distance<br>(mm) | NCV<br>(m/sec) | Onset<br>Latency<br>(msec) | Temp<br>( $^{\circ}$ C) |
| 2701 F            | 4.3                            | 19.8                          | 2.6                         | 17.6                        | 1.8  | 108              | 60.8           | 1.0                         | 16.9                    | 55               | 52.9           | 2.6                        | 37.4                    |
| 2702 F            | 4.1                            | 20.3                          | 2.3                         | 19.1                        | 1.8  | 110              | 60.3           | 1.2                         | 24.2                    | 60               | 49.2           | 2.9                        | 38.2                    |
| Mean              | 4.2                            | 20.1                          | 2.4                         | 18.4                        | 1.8  | 109              | 60.6           | 1.1                         | 20.6                    | 58               | 51.0           | 2.7                        | 37.8                    |
| SD                | 0.1                            | 0.3                           | 0.2                         | 1.1                         | 0.0  | 1.4              | 0.4            | 0.1                         | 5.2                     | 3.5              | 2.6            | 0.2                        | 0.6                     |
| N                 | 2                              | 2                             | 2                           | 2                           | 2    | 2                | 2              | 2                           | 2                       | 2                | 2              | 2                          | 2                       |

| Group 3           | Peroneal Motor Response - Left |                               |                             |                             |      |                  |                | Sural Nerve Response - Left |                         |                  |                | Cauda Equina               | Temp                    |
|-------------------|--------------------------------|-------------------------------|-----------------------------|-----------------------------|------|------------------|----------------|-----------------------------|-------------------------|------------------|----------------|----------------------------|-------------------------|
| Animal ID/<br>Sex | Proximal<br>on. Lat<br>(msec)  | Proximal<br>Amplitude<br>(mV) | Distal<br>on. Lat<br>(msec) | Distal<br>Amplitude<br>(mV) | Diff | Distance<br>(mm) | NCV<br>(m/sec) | Onset<br>Latency<br>(msec)  | Amplitude<br>( $\mu$ V) | Distance<br>(mm) | NCV<br>(m/sec) | Onset<br>Latency<br>(msec) | Temp<br>( $^{\circ}$ C) |
| 3201 M            | 4.5                            | 19.8                          | 2.6                         | 0.0                         | 1.9  | 112              | 59.7           | 1.2                         | 19.0                    | 60               | 52.2           | 2.8                        | 38.2                    |
| 3701 F            | 5.1                            | 19.7                          | 3.1                         | 0.0                         | 2.0  | 118              | 58.3           | 1.2                         | 21.6                    | 60               | 49.2           | 2.8                        | 37.9                    |
| Mean              | 4.8                            | 19.7                          | 2.8                         | 0.0                         | 2.0  | 115.0            | 59.0           | 1.2                         | 20.3                    | 60.0             | 50.7           | 2.8                        | 38.1                    |
| SD                | 0.4                            | 0.1                           | 0.3                         | 0.0                         | 0.1  | 4.2              | 1.0            | 0.0                         | 1.8                     | 0.0              | 2.1            | 0.0                        | 0.2                     |
| N                 | 2                              | 2                             | 2                           | 2                           | 2    | 2                | 2              | 2                           | 2                       | 2                | 2              | 2                          | 2                       |

Sponsor Reference No. UTSW-Gray-SPG50-004

Test Facility Study No. 5550014

**Appendix 9****Appendix 1****Individual and Summary of Nerve Conduction Velocity (NCV)**

Day 45

| Group 1           | Peroneal Motor Response - Left |                               |                             |                             |      |                  |                | Sural Nerve Response - Left |                         |                  |                | Cauda Equina               | Temp |
|-------------------|--------------------------------|-------------------------------|-----------------------------|-----------------------------|------|------------------|----------------|-----------------------------|-------------------------|------------------|----------------|----------------------------|------|
| Animal ID/<br>Sex | Proximal<br>on. Lat<br>(msec)  | Proximal<br>Amplitude<br>(mV) | Distal<br>on. Lat<br>(msec) | Distal<br>Amplitude<br>(mV) | Diff | Distance<br>(mm) | NCV<br>(m/sec) | Onset<br>Latency<br>(msec)  | Amplitude<br>( $\mu$ V) | Distance<br>(mm) | NCV<br>(m/sec) | Onset<br>Latency<br>(msec) | (°C) |
| 1201 M            | 4.6                            | 7.1                           | 2.7                         | 8.5                         | 1.9  | 115              | 61.3           | 1.4                         | 27.0                    | 70               | 50.4           | 3.0                        | 37.4 |
| 1701 F            | 4.6                            | 20.0                          | 3.1                         | 15.2                        | 1.5  | 90               | 60.0           | 1.1                         | 12.6                    | 60               | 53.1           | 2.9                        | 37.5 |
| Mean              | 4.6                            | 13.5                          | 2.9                         | 11.9                        | 1.7  | 102.5            | 60.7           | 1.3                         | 19.8                    | 65.0             | 51.7           | 2.9                        | 37.5 |
| SD                | 0.0                            | 9.2                           | 0.3                         | 4.8                         | 0.3  | 17.7             | 0.9            | 0.2                         | 10.2                    | 7.1              | 1.9            | 0.0                        | 0.1  |
| N                 | 2                              | 2                             | 2                           | 2                           | 2    | 2                | 2              | 2                           | 2                       | 2                | 2              | 2                          | 2    |

| Group 2           | Peroneal Motor Response - Left |                               |                             |                             |      |                  |                | Sural Nerve Response - Left |                         |                  |                | Cauda Equina               | Temp |
|-------------------|--------------------------------|-------------------------------|-----------------------------|-----------------------------|------|------------------|----------------|-----------------------------|-------------------------|------------------|----------------|----------------------------|------|
| Animal ID/<br>Sex | Proximal<br>on. Lat<br>(msec)  | Proximal<br>Amplitude<br>(mV) | Distal<br>on. Lat<br>(msec) | Distal<br>Amplitude<br>(mV) | Diff | Distance<br>(mm) | NCV<br>(m/sec) | Onset<br>Latency<br>(msec)  | Amplitude<br>( $\mu$ V) | Distance<br>(mm) | NCV<br>(m/sec) | Onset<br>Latency<br>(msec) | (°C) |
| 2701 F            | 4.6                            | 17.6                          | 3.0                         | 18.4                        | 1.6  | 100              | 61.5           | 1.3                         | 22.7                    | 70               | 53.8           | 2.7                        | 37.0 |
| 2702 F            | 4.4                            | 17.9                          | 2.4                         | 19.1                        | 2.1  | 120              | 58.5           | 1.2                         | 26.5                    | 65               | 53.3           | 2.9                        | 37.5 |
| Mean              | 4.5                            | 17.7                          | 2.7                         | 18.7                        | 1.8  | 110              | 60.0           | 1.3                         | 24.6                    | 68               | 53.6           | 2.8                        | 37.3 |
| SD                | 0.1                            | 0.2                           | 0.4                         | 0.5                         | 0.3  | 14.1             | 2.1            | 0.1                         | 2.7                     | 3.5              | 0.4            | 0.2                        | 0.4  |
| N                 | 2                              | 2                             | 2                           | 2                           | 2    | 2                | 2              | 2                           | 2                       | 2                | 2              | 2                          | 2    |

| Group 3           | Peroneal Motor Response - Left |                               |                             |                             |      |                  |                | Sural Nerve Response - Left |                         |                  |                | Cauda Equina               | Temp |
|-------------------|--------------------------------|-------------------------------|-----------------------------|-----------------------------|------|------------------|----------------|-----------------------------|-------------------------|------------------|----------------|----------------------------|------|
| Animal ID/<br>Sex | Proximal<br>on. Lat<br>(msec)  | Proximal<br>Amplitude<br>(mV) | Distal<br>on. Lat<br>(msec) | Distal<br>Amplitude<br>(mV) | Diff | Distance<br>(mm) | NCV<br>(m/sec) | Onset<br>Latency<br>(msec)  | Amplitude<br>( $\mu$ V) | Distance<br>(mm) | NCV<br>(m/sec) | Onset<br>Latency<br>(msec) | (°C) |
| 3201 M            | 4.5                            | 15.2                          | 2.5                         | 18.2                        | 2.0  | 115              | 57.5           | 1.5                         | 16.0                    | 65               | 44.2           | 3.3                        | 37.2 |
| 3701 F            | 4.4                            | 17.6                          | 2.5                         | 15.6                        | 1.9  | 110              | 59.5           | 1.3                         | 13.0                    | 60               | 47.6           | 3.0                        | 36.5 |
| Mean              | 4.5                            | 16.4                          | 2.5                         | 16.9                        | 1.9  | 112.5            | 58.5           | 1.4                         | 14.5                    | 62.5             | 45.9           | 3.1                        | 36.9 |
| SD                | 0.1                            | 1.7                           | 0.0                         | 1.9                         | 0.1  | 3.5              | 1.4            | 0.1                         | 2.1                     | 3.5              | 2.4            | 0.2                        | 0.5  |
| N                 | 2                              | 2                             | 2                           | 2                           | 2    | 2                | 2              | 2                           | 2                       | 2                | 2              | 2                          | 2    |

Test Facility Study No. 5550014

Sponsor Reference No. UTSW-Gray-SPG50-004

**Appendix 9****Appendix 1****Individual and Summary of Nerve Conduction Velocity (NCV)**

Day 77

| Group 1           | Peroneal Motor Response - Left |                               |                             |                             |      |                  |                | Sural Nerve Response - Left |                         |                  |                | Cauda Equina               | Temp |
|-------------------|--------------------------------|-------------------------------|-----------------------------|-----------------------------|------|------------------|----------------|-----------------------------|-------------------------|------------------|----------------|----------------------------|------|
| Animal ID/<br>Sex | Proximal<br>on. Lat<br>(msec)  | Proximal<br>Amplitude<br>(mV) | Distal<br>on. Lat<br>(msec) | Distal<br>Amplitude<br>(mV) | Diff | Distance<br>(mm) | NCV<br>(m/sec) | Onset<br>Latency<br>(msec)  | Amplitude<br>( $\mu$ V) | Distance<br>(mm) | NCV<br>(m/sec) | Onset<br>Latency<br>(msec) | (°C) |
| 1201 M            | 4.3                            | 11.5                          | 2.5                         | 12.9                        | 1.8  | 115              | 65.7           | 1.3                         | 14.2                    | 70               | 53.4           | 2.9                        | 37.1 |
| 1701 F            | 4.9                            | 10.6                          | 2.9                         | 16.9                        | 2.0  | 110              | 55.7           | 1.2                         | 14.5                    | 62               | 52.1           | 2.8                        | 37.0 |
| Mean              | 4.6                            | 11.0                          | 2.7                         | 14.9                        | 1.9  | 112.5            | 60.7           | 1.3                         | 14.4                    | 66.0             | 52.8           | 2.8                        | 37.1 |
| SD                | 0.4                            | 0.7                           | 0.3                         | 2.8                         | 0.2  | 3.5              | 7.1            | 0.1                         | 0.2                     | 5.7              | 0.9            | 0.1                        | 0.1  |
| N                 | 2                              | 2                             | 2                           | 2                           | 2    | 2                | 2              | 2                           | 2                       | 2                | 2              | 2                          | 2    |

| Group 2           | Peroneal Motor Response - Left |                               |                             |                             |      |                  |                | Sural Nerve Response - Left |                         |                  |                | Cauda Equina               | Temp |
|-------------------|--------------------------------|-------------------------------|-----------------------------|-----------------------------|------|------------------|----------------|-----------------------------|-------------------------|------------------|----------------|----------------------------|------|
| Animal ID/<br>Sex | Proximal<br>on. Lat<br>(msec)  | Proximal<br>Amplitude<br>(mV) | Distal<br>on. Lat<br>(msec) | Distal<br>Amplitude<br>(mV) | Diff | Distance<br>(mm) | NCV<br>(m/sec) | Onset<br>Latency<br>(msec)  | Amplitude<br>( $\mu$ V) | Distance<br>(mm) | NCV<br>(m/sec) | Onset<br>Latency<br>(msec) | (°C) |
| 2701 F            | 4.3                            | 19.8                          | 2.4                         | 19.7                        | 1.9  | 110              | 58.7           | 1.3                         | 14.7                    | 70               | 54.7           | 2.7                        | 37.9 |
| 2702 F            | 4.2                            | 19.7                          | 2.4                         | 19.6                        | 1.9  | 105              | 56.8           | 1.3                         | 20.4                    | 70               | 54.7           | 2.8                        | 36.8 |
| Mean              | 4.2                            | 19.7                          | 2.4                         | 19.7                        | 1.9  | 108              | 57.7           | 1.3                         | 17.6                    | 70               | 54.7           | 2.7                        | 37.4 |
| SD                | 0.1                            | 0.0                           | 0.0                         | 0.1                         | 0.0  | 3.5              | 1.4            | 0.0                         | 4.0                     | 0.0              | 0.0            | 0.0                        | 0.8  |
| N                 | 2                              | 2                             | 2                           | 2                           | 2    | 2                | 2              | 2                           | 2                       | 2                | 2              | 2                          | 2    |

| Group 3           | Peroneal Motor Response - Left |                               |                             |                             |      |                  |                | Sural Nerve Response - Left |                         |                  |                | Cauda Equina               | Temp |
|-------------------|--------------------------------|-------------------------------|-----------------------------|-----------------------------|------|------------------|----------------|-----------------------------|-------------------------|------------------|----------------|----------------------------|------|
| Animal ID/<br>Sex | Proximal<br>on. Lat<br>(msec)  | Proximal<br>Amplitude<br>(mV) | Distal<br>on. Lat<br>(msec) | Distal<br>Amplitude<br>(mV) | Diff | Distance<br>(mm) | NCV<br>(m/sec) | Onset<br>Latency<br>(msec)  | Amplitude<br>( $\mu$ V) | Distance<br>(mm) | NCV<br>(m/sec) | Onset<br>Latency<br>(msec) | (°C) |
| 3201 M            | 4.4                            | 15.6                          | 2.5                         | 18.5                        | 1.9  | 110              | 57.9           | 1.8                         | 5.0                     | 60               | 34.1           | 2.9                        | 38.1 |
| 3701 F            | 4.3                            | 16.7                          | 2.5                         | 15.4                        | 1.8  | 100              | 56.3           | 1.4                         | 4.0                     | 60               | 44.1           | 2.6                        | 37.3 |
| Mean              | 4.3                            | 16.2                          | 2.5                         | 17.0                        | 1.8  | 105.0            | 57.1           | 1.6                         | 4.5                     | 60.0             | 39.1           | 2.8                        | 37.7 |
| SD                | 0.1                            | 0.8                           | 0.0                         | 2.2                         | 0.1  | 7.1              | 1.1            | 0.3                         | 0.7                     | 0.0              | 7.1            | 0.2                        | 0.6  |
| N                 | 2                              | 2                             | 2                           | 2                           | 2    | 2                | 2              | 2                           | 2                       | 2                | 2              | 2                          | 2    |

**Appendix 9****Appendix 1****Individual and Summary of Nerve Conduction Velocity (NCV)**

Day 92

| Group 1           | Peroneal Motor Response - Left |                               |                             |                             |      |                  |                | Sural Nerve Response - Left |                         |                  |                | Cauda Equina               | Temp            |
|-------------------|--------------------------------|-------------------------------|-----------------------------|-----------------------------|------|------------------|----------------|-----------------------------|-------------------------|------------------|----------------|----------------------------|-----------------|
| Animal ID/<br>Sex | Proximal<br>on. Lat<br>(msec)  | Proximal<br>Amplitude<br>(mV) | Distal<br>on. Lat<br>(msec) | Distal<br>Amplitude<br>(mV) | Diff | Distance<br>(mm) | NCV<br>(m/sec) | Onset<br>Latency<br>(msec)  | Amplitude<br>( $\mu$ V) | Distance<br>(mm) | NCV<br>(m/sec) | Onset<br>Latency<br>(msec) | ( $^{\circ}$ C) |
| 1201 M            | 4.9                            | 12.8                          | 2.8                         | 11.3                        | 2.1  | 115              | 55.4           | 1.3                         | 12.1                    | 70               | 53.4           | 2.8                        | 38.0            |
| 1701 F            | 4.5                            | 10.5                          | 2.5                         | 10.6                        | 1.9  | 110              | 57.1           | 1.2                         | 8.3                     | 60               | 50.8           | 2.9                        | 36.9            |
| Mean              | 4.7                            | 11.6                          | 2.7                         | 11.0                        | 2.0  | 112.5            | 56.3           | 1.2                         | 10.2                    | 65.0             | 52.1           | 2.9                        | 37.5            |
| SD                | 0.3                            | 1.6                           | 0.2                         | 0.5                         | 0.1  | 3.5              | 1.2            | 0.1                         | 2.7                     | 7.1              | 1.8            | 0.1                        | 0.8             |
| N                 | 2                              | 2                             | 2                           | 2                           | 2    | 2                | 2              | 2                           | 2                       | 2                | 2              | 2                          | 2               |

| Group 2           | Peroneal Motor Response - Left |                               |                             |                             |      |                  |                | Sural Nerve Response - Left |                         |                  |                | Cauda Equina               | Temp            |
|-------------------|--------------------------------|-------------------------------|-----------------------------|-----------------------------|------|------------------|----------------|-----------------------------|-------------------------|------------------|----------------|----------------------------|-----------------|
| Animal ID/<br>Sex | Proximal<br>on. Lat<br>(msec)  | Proximal<br>Amplitude<br>(mV) | Distal<br>on. Lat<br>(msec) | Distal<br>Amplitude<br>(mV) | Diff | Distance<br>(mm) | NCV<br>(m/sec) | Onset<br>Latency<br>(msec)  | Amplitude<br>( $\mu$ V) | Distance<br>(mm) | NCV<br>(m/sec) | Onset<br>Latency<br>(msec) | ( $^{\circ}$ C) |
| 2701 F            | 4.3                            | 20.7                          | 2.7                         | 17.1                        | 1.6  | 110              | 68.8           | 1.2                         | 12.6                    | 65               | 53.3           | 2.6                        | 37.5            |
| 2702 F            | 4.1                            | 22.4                          | 2.1                         | 19.2                        | 1.9  | 105              | 54.5           | 1.2                         | 11.1                    | 68               | 56.2           | 2.7                        | 38.2            |
| Mean              | 4.2                            | 21.5                          | 2.4                         | 18.1                        | 1.8  | 108              | 61.6           | 1.2                         | 11.9                    | 67               | 54.7           | 2.6                        | 37.9            |
| SD                | 0.1                            | 1.2                           | 0.4                         | 1.5                         | 0.2  | 3.5              | 10.0           | 0.0                         | 1.1                     | 2.1              | 2.1            | 0.1                        | 0.5             |
| N                 | 2                              | 2                             | 2                           | 2                           | 2    | 2                | 2              | 2                           | 2                       | 2                | 2              | 2                          | 2               |

| Group 3           | Peroneal Motor Response - Left |                               |                             |                             |      |                  |                | Sural Nerve Response - Left |                         |                  |                | Cauda Equina               | Temp            |
|-------------------|--------------------------------|-------------------------------|-----------------------------|-----------------------------|------|------------------|----------------|-----------------------------|-------------------------|------------------|----------------|----------------------------|-----------------|
| Animal ID/<br>Sex | Proximal<br>on. Lat<br>(msec)  | Proximal<br>Amplitude<br>(mV) | Distal<br>on. Lat<br>(msec) | Distal<br>Amplitude<br>(mV) | Diff | Distance<br>(mm) | NCV<br>(m/sec) | Onset<br>Latency<br>(msec)  | Amplitude<br>( $\mu$ V) | Distance<br>(mm) | NCV<br>(m/sec) | Onset<br>Latency<br>(msec) | ( $^{\circ}$ C) |
| 3201 M            | 4.6                            | 13.4                          | 2.7                         | 14.6                        | 1.9  | 110              | 57.1           | 1.9                         | 1.2                     | 60               | 31.9           | 3.1                        | 36.6            |
| 3701 F            | 4.4                            | 13.2                          | 2.4                         | 15.0                        | 2.1  | 120              | 57.8           | 1.4                         | 4.3                     | 60               | 43.5           | 2.8                        | 37.3            |
| Mean              | 4.5                            | 13.3                          | 2.5                         | 14.8                        | 2.0  | 115.0            | 57.5           | 1.6                         | 2.7                     | 60.0             | 37.7           | 2.9                        | 37.0            |
| SD                | 0.1                            | 0.1                           | 0.2                         | 0.3                         | 0.1  | 7.1              | 0.5            | 0.4                         | 2.1                     | 0.0              | 8.2            | 0.2                        | 0.5             |
| N                 | 2                              | 2                             | 2                           | 2                           | 2    | 2                | 2              | 2                           | 2                       | 2                | 2              | 2                          | 2               |

**Appendix 9**

**SIGNATURE(S) FOR DOCUMENT: 5550014 - 5550014 Other Final Report Nerve Conduction Velocity**

|                                     |                                                                                   |                                  |
|-------------------------------------|-----------------------------------------------------------------------------------|----------------------------------|
| <b><u>Individual Scientist:</u></b> | I approve this document.                                                          |                                  |
| Name:                               | <b>Sadekova, Nataliya</b>                                                         |                                  |
|                                     | 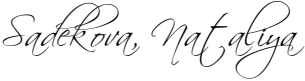 |                                  |
| <hr/>                               |                                                                                   | <hr/>                            |
| Electronically Signed in            |  | Timestamp                        |
|                                     |                                                                                   | 03-Mar-2022 19:48:36 (UTC+00:00) |

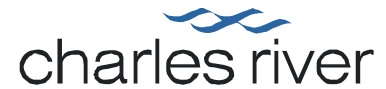

**FINAL REPORT**

**Study Phase: Clinical Pathology**

**Test Facility Study No. 5550014**

**Sponsor Reference No. UTSW-Gray-SPG50-004**

**GLP**

**TEST FACILITY:**

Charles River Laboratories Montreal ULC  
Senneville Site (CR-SEN)

**Appendix 10****TABLE OF CONTENTS**

|                                 |   |
|---------------------------------|---|
| LIST OF APPENDICES.....         | 3 |
| 1. SUMMARY .....                | 4 |
| 2. INTRODUCTION .....           | 5 |
| 3. MATERIALS AND METHODS.....   | 5 |
| 3.1. Experimental Design.....   | 5 |
| 3.2. Computerized Systems ..... | 5 |
| 4. RESULTS AND DISCUSSIONS..... | 6 |
| 4.1. Hematology .....           | 6 |
| 4.2. Coagulation .....          | 6 |
| 4.3. Clinical Chemistry .....   | 7 |
| 4.4. Urinalysis .....           | 7 |
| 5. CONCLUSIONS.....             | 8 |
| 6. REPORT APPROVAL .....        | 9 |

**Appendix 10**

**LIST OF APPENDICES**

|            |                                            |    |
|------------|--------------------------------------------|----|
| Appendix 1 | Individual Hematology Values.....          | 17 |
| Appendix 2 | Individual Coagulation Values.....         | 42 |
| Appendix 3 | Individual Clinical Chemistry Values ..... | 47 |
| Appendix 4 | Individual Urinalysis Values.....          | 67 |

**Appendix 10****1. SUMMARY**

The objectives of this study were to determine the potential toxicity, biodistribution, and gene expression of AAV9/AP4M1, for the treatment of Spastic Paraplegia Type 50 (SPG50) caused by the AP4M1 gene mutation, when given by a single intrathecal injection to monkeys, to evaluate the potential reversibility and/or progression of any findings, and to determine the potential impact of immunosuppressant (IMS) on the toxicity profile of this AAV9 vector.

Three groups of monkeys were administered AAV9/AP4M1 via a single percutaneous intrathecal injection at doses of 0 (Reference),  $8.4 \times 10^{13}$ , or  $1.68 \times 10^{14}$  vg. Blood and urine samples were collected for the evaluation of clinical pathology parameters (hematology, coagulation, clinical chemistry and urinalysis). Animals designated for the terminal necropsy (1/sex in Groups 1 and 3 and 2 females in Group 2) were euthanized on Day 94.

No AAV9/AP4M1-related hematology, clinical chemistry and urinalysis changes were noted at any dose level.

Equivocal mild increases in fibrinogen concentration were noted in male and female administered AAV9/AP4M1 at  $1.68 \times 10^{14}$  vg on Days 52 and 94 (1.82x to 2.55x, individual values compared to respective pretreatment), of higher magnitude than the increases observed in control animals (1.15x to 1.47x). These increases were not associated with relevant changes in globulins or leukocytes and may have been associated with the microscopic necrosis/inflammation observed in the biceps femoris at injection sites and remain of an uncertain relationship to AAV9/AP4M1.

On Day 24 only, one female administered AAV9/AP4M1 at  $8.4 \times 10^{13}$  vg presented transient mild increases in neutrophil (1.56x, individual value compared to respective Day -8 pretreatment) and monocyte (3.77x) counts, a mild increase in fibrinogen concentration (2.11x), mild increases in globulins (1.32x), triglycerides (4.31x), and mild decreases in albumin (0.81x) and albumin/globulin ratio (0.57x). These changes were supportive of inflammation and were possibly related to a moderate skin lesion of the left hindlimb observed on Day 28 in this animal. They were not observed on Day 52 or Day 94, after resolution of the skin lesion. This individual had no particular microscopic findings observed at the end of the study; hence these changes were unlikely AAV9/AP4M1-related.

**Appendix 10****2. INTRODUCTION**

This report presents the clinical pathology findings in monkeys assigned to Study No. 5550014. The objectives of this study were to determine the potential toxicity, biodistribution, and gene expression of AAV9/AP4M1, for the treatment of Spastic Paraplegia Type 50 (SPG50) caused by the AP4M1 gene mutation, when given by a single intrathecal injection to monkeys, to evaluate the potential reversibility and/or progression of any findings, and to determine the potential impact of immunosuppressant (IMS) on the toxicity profile of this AAV9 vector.

This study phase was started on 05 Jul 2021 and completed on 14 Oct 2021.

**3. MATERIALS AND METHODS****3.1. Experimental Design**

Experimental procedures applicable to clinical pathology are summarized in [Text Table 1](#).

Text Table 1  
Experimental Design

| Group No. | Test Material  | Dose Level (vg)       | Dose Volume (mL) | Dose Concentration (vg/mL) | No. of Animals |         |
|-----------|----------------|-----------------------|------------------|----------------------------|----------------|---------|
|           |                |                       |                  |                            | Main Study     |         |
|           |                |                       |                  |                            | Males          | Females |
| 1         | Reference Item | 0                     | 1                | 0                          | 1              | 1       |
| 2         | AAV9/AP4M1     | $8.4 \times 10^{13}$  | 1.55             | $5.43 \times 10^{13}$      | -              | 2       |
| 3         | AAV9/AP4M1     | $1.68 \times 10^{14}$ | 3.10             | $5.43 \times 10^{13}$      | 1              | 1       |

Text Table 2  
Clinical Pathology Evaluation

| Group Nos.  | Occasion/ Time Point | Hematology | Coagulation | Clinical Chemistry | Urinalysis |
|-------------|----------------------|------------|-------------|--------------------|------------|
| All animals | Pretreatment         | X          | X           | X                  | X          |
| 1 to 3      | Day 2                | X          | X           | X                  | X          |
| 1 to 3      | Week 1               | X          | X           | X                  | X          |
| 1 to 3      | Week 2               | -          | -           | X                  | -          |
| 1 to 3      | Week 3               | -          | -           | X                  | -          |
| 1 to 3      | Week 4               | X          | X           | X                  | X          |
| 1 to 3      | Week 8               | X          | X           | X                  | X          |
| 1 to 3      | End of recovery      | X          | X           | X                  | X          |

X = Sample collected; - = Not applicable;

**3.2. Computerized Systems**

Critical computerized systems used in this study phase are listed in [Text Table 3](#).

**Appendix 10**

Text Table 3  
Computerized Systems

| System Name                | Version No. | Description of Data Collected and/or Analyzed                                                     |
|----------------------------|-------------|---------------------------------------------------------------------------------------------------|
| Provantis®                 | 10          | Hematology, coagulation, clinical chemistry and urinalysis.<br>Analysis of numerical in-life data |
| Advia Multispecies System  | 6.9.0 MS    | Hematology parameters                                                                             |
| Cobas 6000 c501 Analyzer   | 06-01       | Clinical chemistry parameters (serum)                                                             |
| STA Compact Stago Analyzer | 108.06      | Coagulation parameters                                                                            |
| Clinitek NOVUS             | 1.3.3       | Urinalysis parameters                                                                             |
| M-Files®                   | 21          | Reporting and collection of 21 CFR Part 11 compliant signature                                    |

**4. RESULTS AND DISCUSSIONS**

For the purpose of this report, treated animals' values were compared to baseline values and control values. Fold change (x) in clinical pathology parameters were determined by comparing the AAV9/AP4M1 individual value to the respective baseline individual value unless otherwise noted.

**4.1. Hematology**

([Appendix 1](#))

No AAV9/AP4M1-related hematology changes were noted at any dose level.

On Day 24 only, one female administered AAV9/AP4M1 at  $8.4 \times 10^{13}$  vg (No. 2702) presented mild increases in neutrophil (1.56x, individual value compared to respective Day-8 pretreatment) and monocyte (3.77x) counts, correlating with changes in coagulation and clinical chemistry parameters. Similar changes in neutrophil and monocyte counts were observed in other animals including one control female (No. 1701) at other timepoints.

All differences in hematology parameters were not considered AAV9/AP4M1-related based on their small magnitude, inconsistent direction, absence of a dose response, general overlap of individual values with the range of control and baseline values, and/or were of a magnitude of change commonly observed in monkeys under similar study conditions.

**4.2. Coagulation**

([Appendix 2](#))

On Day 24 only, one female administered AAV9/AP4M1 at  $8.4 \times 10^{13}$  vg (No. 2702) presented a transient mild increase in fibrinogen concentration (2.11x individual value compared to Day -3 pretreatment), correlating with changes in hematology and clinical chemistry parameters.

A gradual increase in fibrinogen concentration was observed in all individual animals, including control animals between Day 2 and Day 94 compared to their respective Day -8 (Day -3 for Animal No. 1201) pretreatment values. On Days 52 and 94, male and female administered AAV9/AP4M1 at  $1.68 \times 10^{14}$  vg (Nos. 3201 and 3701) presented mild increases in fibrinogen

**Appendix 10**

concentration (1.82x to 2.55x, individual values compared to respective pretreatment) that were of higher magnitude than the increases observed in control animals (1.15x to 1.47x, individual values compared to pretreatment). These increases were not associated with relevant changes in globulins or leukocytes. They occurred several weeks after the administration of AAV9/AP4M1 and may have been associated with the microscopic necrosis/inflammation observed in the biceps femoris at injection sites, they remain of an uncertain relationship to AAV9/AP4M1.

Remaining differences in coagulation parameters were not considered AAV9/AP4M1-related based on their small magnitude, inconsistent direction, absence of a dose response, general overlap of individual values with the range of control and baseline values, and/or were of a magnitude of change commonly observed in monkeys under similar study conditions.

**4.3. Clinical Chemistry**

(Appendix 3)

No AAV9/AP4M1-related clinical chemistry changes were noted at any dose level.

On Day 24 only, one female administered AAV9/AP4M1 at  $8.4 \times 10^{13}$  vg (No. 2702) presented transient mild increases in globulins (1.32x, individual values compared to Day -8 pretreatment), triglycerides (4.31x), and decreases in albumin (0.81x) and albumin/globulin ratio (0.57x). These changes correlated with increases in neutrophil and monocyte counts, and an increase in fibrinogen concentration. They were supportive of inflammation and were possibly related to a moderate skin lesion of the left hindlimb observed on Day 28 in this animal. These changes were not observed on Day 52 or Day 94, after resolution of the skin lesion. This individual had no particular microscopic findings observed at the end of the study; hence these changes were unlikely AAV9/AP4M1-related.

Remaining differences in clinical chemistry parameters were not considered AAV9/AP4M1-related based on their small magnitude, inconsistent direction, absence of a dose response, general overlap of individual values with the range of control and baseline values, and/or were of a magnitude of change commonly observed in monkeys under similar study conditions.

**4.4. Urinalysis**

(Appendix 4)

No AAV9/AP4M1-related urinalysis changes were noted at any dose level.

All differences in urinalysis parameters were not considered AAV9/AP4M1-related based on their small magnitude, inconsistent direction, absence of a dose response, general overlap of individual values with the range of control and baseline values, and/or were of a magnitude of change commonly observed in monkeys under similar study conditions.

**Appendix 10****5. CONCLUSIONS**

Administration of AAV9/AP4M1 to monkeys when given by a single intrathecal injection at  $8.4 \times 10^{13}$  or  $1.68 \times 10^{14}$  vg elicited equivocal mild increases in fibrinogen concentration in male and female administered AAV9/AP4M1 at  $1.68 \times 10^{14}$  vg on Days 52 and 94. These increases may have been associated with microscopic necrosis/inflammation observed in the biceps femoris at injection sites and remain of an uncertain relationship to AAV9/AP4M1. No AAV9/AP4M1-related hematology, clinical chemistry or urinalysis changes were noted at any dose level.

On Day 24 only, one female administered AAV9/AP4M1 at  $8.4 \times 10^{13}$  vg presented transient mild increases in neutrophil and monocyte counts, fibrinogen concentration, globulins and triglycerides, and mild decreases in albumin and albumin/globulin ratio. These changes were supportive of inflammation and were possibly related to a moderate skin lesion of the left hindlimb observed on Day 28 in this animal. Changes were not observed on Day 52 or Day 94, after resolution of the skin lesion. This individual had no particular microscopic findings observed at the end of the study; hence these changes were unlikely AAV9/AP4M1-related.

## **6. REPORT APPROVAL**

All electronic signatures appear at the end of the document upon finalization.

**Appendix 10****Individual Clinical Pathology Explanation Page****Hematology****ADVIA Analyzer**

## Analyzed Parameter Descriptions

| <b>Parameter</b>                          | <b>Abbreviation</b> | <b>Units</b>              | <b>Methodology</b> |
|-------------------------------------------|---------------------|---------------------------|--------------------|
| Hematocrit                                | HCT                 | %                         | Calculated         |
| Hemoglobin                                | HGB                 | g/dL                      | Colorimetric       |
| Mean Corpuscular Hemoglobin               | MCH                 | pg                        | Calculated         |
| Mean Corpuscular Hemoglobin Concentration | MCHC                | g/dL                      | Calculated         |
| Mean Corpuscular Volume                   | MCV                 | fL                        | Calculated         |
| Mean Platelet Volume                      | MPV                 | fL                        | Calculated         |
| Platelet Distribution Width               | PDW                 | %                         | Calculated         |
| Platelet Count                            | PLT                 | $\times 10^3/\mu\text{L}$ | Light scatter      |
| Red Blood Cell Count                      | RBC                 | $\times 10^6/\mu\text{L}$ | Light scatter      |
| Red Blood Cell Distribution Width         | RDW                 | %                         | Calculated         |
| Reticulocytes                             | RETIC               | $\times 10^9/\text{L}$    | Calculated         |
| Reticulocytes Percent                     | RETIC               | %                         | Light scatter      |
| White Blood Cell Count                    | WBC                 | $\times 10^3/\mu\text{L}$ | Light scatter      |
| White Blood Cell Differential Count       |                     |                           |                    |
| Neutrophils Percent                       | NEUT                | %                         | Light scatter      |
| Lymphocytes Percent                       | LYMPH               | %                         | Light scatter      |
| Monocytes Percent                         | MONO                | %                         | Light scatter      |
| Eosinophils Percent                       | EOS                 | %                         | Light scatter      |
| Basophils Percent                         | BASO                | %                         | Light scatter      |
| Large Unstained Cells Percent             | LUC                 | %                         | Light scatter      |
| Neutrophils                               | NEUT                | $\times 10^3/\mu\text{L}$ | Calculated         |
| Lymphocytes                               | LYMPH               | $\times 10^3/\mu\text{L}$ | Calculated         |
| Monocytes                                 | MONO                | $\times 10^3/\mu\text{L}$ | Calculated         |
| Eosinophils                               | EOS                 | $\times 10^3/\mu\text{L}$ | Calculated         |
| Basophils                                 | BASO                | $\times 10^3/\mu\text{L}$ | Calculated         |
| Large Unstained Cells                     | LUC                 | $\times 10^3/\mu\text{L}$ | Calculated         |

**Manual and Visual**

## Analyzed Parameter Descriptions

| <b>Parameter</b>                           | <b>Abbreviation</b> | <b>Units</b>                          | <b>Methodology</b>                           |
|--------------------------------------------|---------------------|---------------------------------------|----------------------------------------------|
| <u>White Blood Cell Differential Count</u> |                     | % and/or<br>$\times 10^3/\mu\text{L}$ | Microscopic enumeration<br>(100 white cells) |
| - Immature Neutrophils Count               | IMM NEUT            |                                       |                                              |
| - Immature Neutrophils Percent             | IMM NEUT            |                                       |                                              |
| - Immature Cells Percent                   | IMM CELL            |                                       |                                              |
| - Immature Cells Count                     | IMM CELL            |                                       |                                              |
| - Large Platelets                          | LPLT                |                                       |                                              |
| - Neutrophils Band Form                    | NEUT BAND           |                                       |                                              |

**Appendix 10**

|                                            |              |               |                                                                                                      |
|--------------------------------------------|--------------|---------------|------------------------------------------------------------------------------------------------------|
| - Neutrophils Band Form Percent            | NEUT BAND    |               |                                                                                                      |
| - Packed Cell Volume                       | PCV          |               |                                                                                                      |
| - Neutrophils                              | NEUT         |               |                                                                                                      |
| - Lymphocytes                              | LYMPH        |               |                                                                                                      |
| - Monocytes                                | MONO         |               |                                                                                                      |
| - Eosinophils                              | EOS          |               |                                                                                                      |
| - Basophils                                | BASO         |               |                                                                                                      |
| Others                                     |              |               |                                                                                                      |
| Bone Marrow Stain                          |              | None          | Manual, Wright-Giemsa stain                                                                          |
| Bone Marrow Slide Fixation                 |              | None          | Manual, Fixative                                                                                     |
| - Nucleated Red Blood Cells/100 Leukocytes | RBCNUCLE     | #/100 WBC     | Microscopic enumeration (100 white cells)<br>Reported as Number but not included in WBC Differential |
| CELL MORPHOLOGY                            |              |               |                                                                                                      |
| - Cytoplasmic Basophilia Neutrophil        | CYTO BASO    | 1+ (Minimal)  | Microscopic Examination                                                                              |
|                                            | NEUT         | 2+ (Mild)     |                                                                                                      |
|                                            | POLY         | 3+ (Moderate) |                                                                                                      |
|                                            | ANISO        | 4+ (Marked)   |                                                                                                      |
| - Polychromasia                            | POLY         |               |                                                                                                      |
| - Anisocytosis                             | ANISO        |               |                                                                                                      |
| - Hypochromasia                            | HYPO         |               |                                                                                                      |
| - Reactive Lymphocytes                     | REACTIVE     |               |                                                                                                      |
|                                            | LYMPH        |               |                                                                                                      |
| - Megakaryocytes                           | MEGAK        |               |                                                                                                      |
| - Smudge Cells                             | SMUDGE CELL  |               |                                                                                                      |
| - Microcytes                               | MICROCYTES   |               |                                                                                                      |
| - Macrocytes                               | MACROCYTES   |               |                                                                                                      |
| - Poikilocytosis                           | POIK         |               |                                                                                                      |
| - Rouleaux Formation                       | ROULEAUX     |               |                                                                                                      |
| - Agglutination                            | AGGL         |               |                                                                                                      |
| - Red Blood Cell Clumping                  | RBC Clumping |               |                                                                                                      |
| - Acanthocytes                             | ACAN         |               |                                                                                                      |
| - Codocytes                                | CODO         |               |                                                                                                      |
| - Dacryocytes                              | DACR         |               |                                                                                                      |
| - Platelet Clumps                          | PLATELET     |               |                                                                                                      |
|                                            | CLUMPS       |               |                                                                                                      |
| - Eccentricocytes                          | ECCENTCY     |               |                                                                                                      |
| - Schistocytes                             | SCHZ         |               |                                                                                                      |
| - Spherocytes                              | SPHR         |               |                                                                                                      |
| - Stomatocytes                             | STOM         |               |                                                                                                      |
| - Howell Jolly Bodies                      | HJB          |               |                                                                                                      |
| - Basophilic Stippling                     | BASO STIP    |               |                                                                                                      |
| - Echinocytes                              | ECHINO       |               |                                                                                                      |
| - Vacuolated Neutrophils                   | VAC NEUT     |               |                                                                                                      |
| - Vacuolated Lymphocytoid                  | VAC LYM      |               |                                                                                                      |
| - Döhle Bodies                             | DOHLE BODY   |               |                                                                                                      |
| - Degenerated Cells                        | DEG CELL     |               |                                                                                                      |
| - Ovalocytes                               | OVAL         |               |                                                                                                      |
| - Large Platelets Alpha                    | LARGE        |               |                                                                                                      |
|                                            | PLATELETS    |               |                                                                                                      |

**Appendix 10**

|                                    |                 |   |                                                                      |
|------------------------------------|-----------------|---|----------------------------------------------------------------------|
| - Immature Neutrophils Morphology  | IMM NEUT MORPH  |   |                                                                      |
| - Heinz Bodies                     | HEINZ BODY      |   |                                                                      |
| - Plasmodium                       | PLASMOD         |   |                                                                      |
| - Kurloff Cell                     | KURL            |   |                                                                      |
| - Burr Cells                       | BURR            |   |                                                                      |
| - Neutrophils Band Form Morphology | NEUT BAND MORPH |   |                                                                      |
| - Nuclear Swelling                 | NUC SWELL NEUT  |   |                                                                      |
| - Red Blood Cell Morphology        | RBC MORPH       |   |                                                                      |
| - White Blood Cell Morphology      | WBC MORPH       |   |                                                                      |
| - Toxic Granulation                | TOXG            |   |                                                                      |
| - Platelet Morphology              | PLT MORPH       |   |                                                                      |
| Heinz Bodies Percent               | HEINZ BODY      | % | Microscopic examination.<br>Methyl violet in<br>physiological saline |
| Reticulocyte Percent               | RETIC           | % | Microscopic enumeration,<br>new methylene blue stain                 |

**Aerospray Automated Slide Stainer**

## Analyzed Parameter Descriptions

| Parameter                           | Abbreviation | Units | Methodology                           |
|-------------------------------------|--------------|-------|---------------------------------------|
| White Blood Cell Differential Stain |              | None  | 2 parts aqueous stain (Eosin-Thiazin) |

**Midas III Slide Stainer**

## Analyzed Parameter Descriptions

| Parameter                           | Abbreviation | Units | Methodology         |
|-------------------------------------|--------------|-------|---------------------|
| White Blood Cell Differential Stain |              | None  | Wright-Giemsa stain |
| Bone Marrow Stain                   |              | None  | Wright-Giemsa stain |
| Bone Marrow Slide Fixation          |              | None  | Fixative            |

**Coagulation****START 4 Compact Stago Analyzer**

## Analyzed Parameter Descriptions

| Parameter                             | Abbreviation | Units | Methodology |
|---------------------------------------|--------------|-------|-------------|
| Activated Partial Thromboplastin Time | APTT         | sec   | Viscosity   |
| Fibrinogen                            | FIB          | mg/dL | Viscosity   |
| Prothrombin Time                      | PT           | sec   | Viscosity   |

**STA Compact Stago Analyzer**

## Analyzed Parameter Descriptions

| Parameter                             | Abbreviation | Units | Methodology |
|---------------------------------------|--------------|-------|-------------|
| Activated Partial Thromboplastin Time | APTT         | sec   | Viscosity   |
| Fibrinogen                            | FIB          | mg/dL | Viscosity   |

**Appendix 10**

Prothrombin Time

PT

sec

Viscosity

**Plasma Appearance****(Reported as SAMQ Coagulation)**

## Analyzed Parameter Descriptions

| Parameter        | Abbreviation | Degree is graded as                                                                              | Methodology       |
|------------------|--------------|--------------------------------------------------------------------------------------------------|-------------------|
| Normal sample    | N            | Normal                                                                                           | Manual and visual |
| Hemolyzed sample | H            | + = slight (pale/light red)<br>++ = moderate (red)<br>+++ = severe (dark red)                    | Manual and visual |
| Lipemic sample   | L            | + = slight (cloudy)<br>++ = moderate (turbid)<br>+++ = severe (lactescent)                       | Manual and visual |
| Icterus sample   | I            | + = slight (dark yellow)<br>++ = moderate (very dark yellow)<br>+++ = severe (dark yellow-green) | Manual and visual |

**Clinical Chemistry****Cobas 6000 Analyzer**

## Analyzed Parameter Descriptions

| Parameter                           | Abbreviation | Units  | Methodology                                              |
|-------------------------------------|--------------|--------|----------------------------------------------------------|
| Alanine Aminotransferase            | ALT          | U/L    | ALT IFCC UV                                              |
| Albumin                             | ALB          | g/dL   | Bromcresol green colorimetric                            |
| Alkaline Phosphatase                | ALP          | U/L    | ALP IFCC liquid colorimetric                             |
| Amylase                             | AMYL         | U/L    | Enzymatic colorimetric                                   |
| Aspartate Aminotransferase          | AST          | U/L    | AST IFCC UV                                              |
| Calcium (Alternate)                 | CA           | mg/dL  | O-cresolphthalein complexone colorimetric                |
| Cholesterol                         | CHOL         | mg/dL  | CHOD-PAP enzymatic colorimetric                          |
| Creatinine                          | CREAT        | mg/dL  | Jaffe kinetic colorimetric. Rate-blanked and compensated |
| Creatine Kinase                     | CK           | U/L    | NAC activated UV                                         |
| C-Reactive Protein                  | CRP          | mg/L   | Immunoturbidimetric                                      |
| C-Reactive Protein High Sensitivity | CRP HS       | mg/L   | Immunoturbidimetric                                      |
| Direct Bilirubin                    | DBIL         | mg/dL  | Jendrassik colorimetric                                  |
| GAMMA-Glutamyl Transferase          | GGT          | U/L    | Nitro-Anilide, Glycylglycine; enzymatic colorimetric     |
| Glutamate Dehydrogenase             | GLDH         | U/L    | Kinetic UV                                               |
| Glucose                             | GLUC         | mg/dL  | Hexokinase UV                                            |
| Iron                                | FE           | µg/dL  | Colorimetric                                             |
| Lactate                             | LACT         | mg/dL  | Enzymatic colorimetric                                   |
| Magnesium                           | MG           | mg/dL  | Colorimetric                                             |
| Phosphorus                          | PHOS         | mg/dL  | Molybdate UV                                             |
| Sodium, Potassium, Chloride (SI)    | NA,K,CL      | mmol/L | Indirect measurement (Ion selective electrode)           |
| Total Bilirubin                     | TBIL         | mg/dL  | DPD colorimetric                                         |
| Total Protein                       | TPROT        | g/dL   | Biuret colorimetric                                      |

**Appendix 10**

|               |       |       |                                |
|---------------|-------|-------|--------------------------------|
| Triglycerides | TRIG  | mg/dL | GPO-PAP enzymatic colorimetric |
| Urea Nitrogen | UREAN | mg/dL | Urease kinetic UV              |

**Calculations**

## Analyzed Parameter Descriptions

| Parameter                        | Abbreviation | Units | Calculation                        |
|----------------------------------|--------------|-------|------------------------------------|
| Albumin/Globulin ratio           | A/G          | ratio | Albumin / Globulin                 |
| Globulin                         | GLOB         | g/dL  | Total Protein - Albumin            |
| Indirect Bilirubin               | IBIL         | mg/dL | Total Bilirubin - Direct Bilirubin |
| Urea Nitrogen / Creatinine ratio | UREAN/CREAT  | None  | Urea Nitrogen / Creatinine         |

**Serum Appearance (Reported as SAMQ)**

## Analyzed Parameter Descriptions

| Parameter        | Abbreviation | Key to Results (Code)                                                                            | Methodology       |
|------------------|--------------|--------------------------------------------------------------------------------------------------|-------------------|
| Normal sample    | N            | Normal                                                                                           | Manual and visual |
| Hemolyzed sample | H            | + = slight (pale/light red)<br>++ = moderate (red)<br>+++ = severe (dark red)                    | Manual and visual |
| Lipemic sample   | L            | + = slight (cloudy)<br>++ = moderate (turbid)<br>+++ = severe (lactescent)                       | Manual and visual |
| Icterus sample   | I            | + = slight (dark yellow)<br>++ = moderate (very dark yellow)<br>+++ = severe (dark yellow-green) | Manual and visual |

**Urinalysis****Clinitek**

## Analyzed Parameter Descriptions

| Parameter                     | Abbreviation | Key to Results (Code)                                                                                                                | Methodology                             |
|-------------------------------|--------------|--------------------------------------------------------------------------------------------------------------------------------------|-----------------------------------------|
| <b>Macroscopic Urinalysis</b> |              |                                                                                                                                      |                                         |
| Urine Bilirubin               | BIL          | Negative (Neg), 1+ (small), 2+ (Moderate), 3+ (Large)                                                                                | Automated reflectance spectrophotometer |
| Urine Blood                   | BLD          | Negative (Neg), 1+ (Trace), 2+ (Small), 3+ (Moderate), 4+ (Large)                                                                    | Automated reflectance spectrophotometer |
| Urine Color                   | COLOR        | Co = Colorless, LY = Light Yellow, DY = Dark Yellow, Or = Orange, Re = Red, Br = Brown, Gr = Green, Ot = Other (color is identified) | Automated reflectance spectrophotometer |
| Urine Clarity                 | CLARITY      | Clr = Clear, Cld = Cloudy, Tur = Turbid                                                                                              | Automated reflectance spectrophotometer |
| Urine Glucose Alpha           | GLUC         | Negative (Neg), 1+ (5.5 mmol/L), 2+ (14 mmol/L), 3+ (28 mmol/L), 4+ (≥55 mmol/L)                                                     | Automated reflectance spectrophotometer |
| Urine Ketones                 | KET          | Negative (Neg), 1+ (Trace), 2+ (1.5 mmol/L), 3+ (3.9 mmol/L), 4+ (≥ 7.8 mmol/L)                                                      | Automated reflectance spectrophotometer |

**Appendix 10**

|                        |                  |                                                                                                             |                                         |
|------------------------|------------------|-------------------------------------------------------------------------------------------------------------|-----------------------------------------|
| Urine Nitrite          | NIT              | mmol /L)<br>Negative (Neg) (-),<br>Positive (Pos) (+)                                                       | Automated reflectance spectrophotometer |
| Urine pH               | URINE pH         | 4.5, 5.0, 5.5, 6.0, 6.5, 7.0, 7.5, 8.0, 8.5, 9.0, $\geq 9.0$                                                | Automated reflectance spectrophotometer |
| Urine Protein Alpha    | PROT             | Negative (Neg), 1+ (Trace), 2+ (0.3g/L), 3+ (1.0 g/L), 4+ ( $\geq 3.0$ g/L)                                 | Automated reflectance spectrophotometer |
| Urine Specific Gravity | SPECIFIC GRAVITY | 1.000 to 1.099 ( $\geq 1.099$ )                                                                             | Automated reflectance spectrophotometer |
| Urine Urobilinogen     | UROBIL           | Negative (Neg), 1+ (16 $\mu$ mol/L), 2+ (33 $\mu$ mol/L), 3+ (66 $\mu$ mol/L), 4+ ( $\geq 131$ $\mu$ mol/L) | Automated reflectance spectrophotometer |

**Manual and Visual**

## Analyzed Parameter Descriptions

| Parameter              | Abbreviation     | Key to Results (Code)/Unit                                                                                                          | Methodology                                               |
|------------------------|------------------|-------------------------------------------------------------------------------------------------------------------------------------|-----------------------------------------------------------|
| Urine Bilirubin        | BIL              | Negative (Neg), 1+ (small), 2+ (Moderate), 3+ (Large)                                                                               | Manual Results – Multistix strip                          |
| Urine Blood            | BLD              | Negative (Neg), 1+ (Trace), 2+ (Small), 3+ (Moderate), 4+ (Large)                                                                   | Manual Results – Multistix strip                          |
| Urine Color            | COLOR            | Co = Colorless, LY = Light Yellow, DY = Dark Yellow, Or = Orange, Re= Red, Br = Brown, Gr = Green, Ot = Other (color is identified) | Manual and visual                                         |
| Urine Clarity          | CLARITY          | Clr = Clear, Cld = Cloudy, Tur= Turbid                                                                                              | Manual and visual                                         |
| Urine Glucose Alpha    | GLUC             | Negative (Neg), 1+ (5.5 mmol/L), 2+ (14 mmol/L) 3+ (28 mmol/L), 4+ (55 mmol/L or $\geq 111$ mmol/L)                                 | Manual Results – Multistix strip                          |
| Urine Ketones          | KET              | Negative (Neg), 1+ (0.5 mmol/L), 2+ (1.5 mmol/L), 3+ (4.0 mmol /L), 4+ (8 mmol /L or 16 mmol/L)                                     | Manual Results – Multistix strip                          |
| Urine Nitrite          | NIT              | Negative (Neg) (-),<br>Positive (Pos) (+)                                                                                           | Manual Results – Multistix strip                          |
| Urine pH               | URINE pH         | 4.5, 5.0, 5.5, 6.0, 6.5, 7.0, 7.5, 8.0, 8.5                                                                                         | Manual Results – Multistix strip                          |
| Urine Protein Alpha    | PROT             | Negative (Neg), 1+ (Trace), 2+ (0.3g/L), 3+ (1.0 g/L), 4+ ( $\geq 3.0$ g/L or $\geq 20.0$ g/L)                                      | Manual Results – Multistix strip                          |
| Urine Specific Gravity | SPECIFIC GRAVITY | None                                                                                                                                | Manual Results – Refractive index using the Refractometer |
| Urine Urobilinogen     | UROBIL           | Neg (3.2 $\mu$ mol/L ), 1+ (16 $\mu$ mol/L), 2+ (33 $\mu$ mol/L), 3+ (66 $\mu$ mol/L), 4+ (131 $\mu$ mol/L)                         | Manual Results – Multistix strip                          |
| Urine Volume           | VOLUME           | mL                                                                                                                                  | Manual and visual                                         |

**Appendix 10****Other Abbreviations**

| <b>Abbreviation</b> | <b>Description</b>                                                                                          | <b>Abbreviation</b> | <b>Description</b>                                                                                                        |
|---------------------|-------------------------------------------------------------------------------------------------------------|---------------------|---------------------------------------------------------------------------------------------------------------------------|
| ./-                 | Not required for veterinary monitoring / Not scheduled to be performed / No findings / Not evaluated / Dead | NT                  | Not taken                                                                                                                 |
| ADQ                 | Adequate                                                                                                    | OA                  | Omitted activity                                                                                                          |
| CLOT                | Sample clotted                                                                                              | QNS                 | Quantity not sufficient                                                                                                   |
| COM                 | Contaminated with organic material                                                                          | RC                  | Result comment                                                                                                            |
| COMM                | Comment added                                                                                               | SC                  | Sample comment                                                                                                            |
| DEC                 | Decreased                                                                                                   | SNR                 | Sample not received                                                                                                       |
| FC                  | Flag comment                                                                                                | TNR                 | Test not reported                                                                                                         |
| GFC                 | Gross fecal contamination present                                                                           | TTSM                | Sample was analyzed 3 times (original, 1 <sup>st</sup> and 2 <sup>nd</sup> repeats), values not comparable (not reported) |
| INC                 | Increased                                                                                                   | U/#                 | U/collection period                                                                                                       |
| LIF                 | Laboratory Investigation Form                                                                               | Unsc                | Unscheduled                                                                                                               |
| LLOQ                | Less than lower limit of quantitation                                                                       | UPTD                | Unable to perform due to technical difficulty                                                                             |
| MDIFF               | Manual differential                                                                                         | UTD                 | Unable to determine                                                                                                       |
| mg/#                | mg/collection period                                                                                        | UTDH                | Unable to determine due to marked hemolysis                                                                               |
| NAF                 | No abnormal findings                                                                                        | UTDL                | Unable to determine due to marked lipemia                                                                                 |
| NC                  | Not calculable                                                                                              | UTDM                | Unable to determine, not confirmed by microscopy                                                                          |
| NCD                 | No clot detected                                                                                            | UTDR                | Unable to determine, results not reproducible                                                                             |
| NSCH                | Not scheduled to be performed                                                                               | Vet                 | Collection for veterinary monitoring                                                                                      |

Note: This is a comprehensive list of systems, parameters and/or abbreviations. Everything listed above may not be applicable to this report.

Note: Additional morphology for flagged samples may be reported if applicable.

**Dosing Information**

Dosing information is abbreviated on various data outputs; the following represents the dosing information for this study.

| <b>Group No.</b> | <b>Test Material</b> | <b>Dose Level (vg)</b> |
|------------------|----------------------|------------------------|
| 1                | Reference Item       | 0                      |
| 2                | AAV9/AP4M1           | 8.4x10 <sup>13</sup>   |
| 3                | AAV9/AP4M1           | 1.68x10 <sup>14</sup>  |

Sponsor Reference No. UTSW-Gray-SPG50-004

Test Facility Study No. 5550014

**Appendix 10****Appendix 1****Individual Hematology Values****5550014**

Sex: Male

| 0<br>vg |                                  | Reporting Hematology         |                               |                                |                               |
|---------|----------------------------------|------------------------------|-------------------------------|--------------------------------|-------------------------------|
| Group 1 | Day(s) Relative to<br>Start Date | WBC<br>(10 <sup>3</sup> /uL) | NEUT<br>(10 <sup>3</sup> /uL) | LYMPH<br>(10 <sup>3</sup> /uL) | MONO<br>(10 <sup>3</sup> /uL) |
| 1201    | -8                               | 12.31                        | 8.30                          | 3.22                           | 0.58                          |
|         | 2                                | 8.92                         | 5.55                          | 2.93                           | 0.38                          |
|         | 6                                | 7.36                         | 3.68                          | 3.24                           | 0.29                          |
|         | 24                               | 9.89                         | 6.18                          | 2.94                           | 0.66                          |
|         | 52                               | 11.27                        | 6.27                          | 4.17                           | 0.70                          |
|         | 94                               | 11.06                        | 6.28                          | 4.16                           | 0.50                          |

Test Facility Study No. 5550014

Sponsor Reference No. UTSW-Gray-SPG50-004

**Appendix 10****Appendix 1****Individual Hematology Values****5550014**

Sex: Male

| 0<br>vg |                                  | Reporting Hematology         |                               |                              |                              |
|---------|----------------------------------|------------------------------|-------------------------------|------------------------------|------------------------------|
| Group 1 | Day(s) Relative to<br>Start Date | EOS<br>(10 <sup>3</sup> /uL) | BASO<br>(10 <sup>3</sup> /uL) | LUC<br>(10 <sup>3</sup> /uL) | RBC<br>(10 <sup>6</sup> /uL) |
| 1201    | -8                               | 0.11                         | 0.06                          | 0.04                         | 6.27                         |
|         | 2                                | 0.03                         | 0.01                          | 0.02                         | 5.95                         |
|         | 6                                | 0.15                         | 0.00                          | MDIFF                        | 5.81                         |
|         | 24                               | 0.06                         | 0.02                          | 0.03                         | 5.95                         |
|         | 52                               | 0.06                         | 0.04                          | 0.04                         | 6.31                         |
|         | 94                               | 0.04                         | 0.03                          | 0.04                         | 6.85                         |

**Appendix 10****Appendix 1****Individual Hematology Values****5550014**

Sex: Male

| 0<br>vg<br><br>Group 1      Day(s) Relative to<br>Start Date |    | Reporting Hematology |            |             |             |
|--------------------------------------------------------------|----|----------------------|------------|-------------|-------------|
|                                                              |    | HGB<br>(g/dL)        | HCT<br>(%) | MCV<br>(fL) | MCH<br>(pg) |
| 1201                                                         | -8 | 14.5                 | 45.7       | 72.8        | 23.1        |
|                                                              | 2  | 13.8                 | 45.0       | 75.6        | 23.1        |
|                                                              | 6  | 13.4                 | 43.9       | 75.5        | 23.0        |
|                                                              | 24 | 13.3                 | 42.2       | 71.0        | 22.3        |
|                                                              | 52 | 14.2                 | 45.8       | 72.6        | 22.4        |
|                                                              | 94 | 14.8                 | 49.6       | 72.5        | 21.6        |

Sponsor Reference No. UTSW-Gray-SPG50-004

Test Facility Study No. 5550014

**Appendix 10****Appendix 1****Individual Hematology Values****5550014**

Sex: Male

| 0<br>vg |                                  | Reporting Hematology |            |                              |                               |
|---------|----------------------------------|----------------------|------------|------------------------------|-------------------------------|
| Group 1 | Day(s) Relative to<br>Start Date | MCHC<br>(g/dL)       | RDW<br>(%) | PLT<br>(10 <sup>3</sup> /uL) | RETIC<br>(10 <sup>9</sup> /L) |
| 1201    | -8                               | 31.7                 | 12.6       | 305                          | 49.2                          |
|         | 2                                | 30.5                 | 12.0       | 603                          | 52.4                          |
|         | 6                                | 30.5                 | 11.3       | 492                          | 86.0                          |
|         | 24                               | 31.5                 | 11.2       | 382                          | 83.2                          |
|         | 52                               | 30.9                 | 11.8       | 449                          | 64.3                          |
|         | 94                               | 29.9                 | 11.8       | 391                          | 76.1                          |

Test Facility Study No. 5550014

Sponsor Reference No. UTSW-Gray-SPG50-004

Sponsor Reference No. UTSW-Gray-SPG50-004

Test Facility Study No. 5550014

**Appendix 10****Appendix 1****Individual Hematology Values****5550014**

Sex: Male

| 0<br>vg<br><br>Group 1      Day(s) Relative to<br>Start Date |    | Reporting Hematology |                    |              |
|--------------------------------------------------------------|----|----------------------|--------------------|--------------|
|                                                              |    | ANISO                | PLATELET<br>CLUMPS | WBC<br>MORPH |
| 1201                                                         | -8 | -                    | -                  | -            |
|                                                              | 2  | -                    | -                  | -            |
|                                                              | 6  | 1+                   | 4+                 | NAF          |
|                                                              | 24 | -                    | -                  | -            |
|                                                              | 52 | -                    | -                  | -            |
|                                                              | 94 | -                    | -                  | -            |

Test Facility Study No. 5550014

Sponsor Reference No. UTSW-Gray-SPG50-004

Sponsor Reference No. UTSW-Gray-SPG50-004

Test Facility Study No. 5550014

**Appendix 10****Appendix 1****Individual Hematology Values****5550014**

Sex: Male

| 1.68<br>X10E14<br>vg<br>Group 3  |    | Reporting Hematology         |                               |                                |                               |
|----------------------------------|----|------------------------------|-------------------------------|--------------------------------|-------------------------------|
| Day(s) Relative to<br>Start Date |    | WBC<br>(10 <sup>3</sup> /uL) | NEUT<br>(10 <sup>3</sup> /uL) | LYMPH<br>(10 <sup>3</sup> /uL) | MONO<br>(10 <sup>3</sup> /uL) |
| 3201                             | -8 | 13.03                        | 4.78                          | 7.72                           | 0.17                          |
|                                  | 2  | 11.72                        | 6.82                          | 4.42                           | 0.28                          |
|                                  | 6  | 10.82                        | 4.23                          | 5.92                           | 0.32                          |
|                                  | 24 | 12.50                        | 6.67                          | 5.27                           | 0.40                          |
|                                  | 52 | 14.37                        | 8.37                          | 5.36                           | 0.46                          |
|                                  | 94 | 16.67                        | 10.45                         | 5.71                           | 0.38                          |

Test Facility Study No. 5550014

Sponsor Reference No. UTSW-Gray-SPG50-004

Sponsor Reference No. UTSW-Gray-SPG50-004

Test Facility Study No. 5550014

**Appendix 10****Appendix 1****Individual Hematology Values****5550014**

Sex: Male

| 1.68<br>X10E14<br>vg<br>Group 3  |    | Reporting Hematology         |                               |                              |                              |
|----------------------------------|----|------------------------------|-------------------------------|------------------------------|------------------------------|
| Day(s) Relative to<br>Start Date |    | EOS<br>(10 <sup>3</sup> /uL) | BASO<br>(10 <sup>3</sup> /uL) | LUC<br>(10 <sup>3</sup> /uL) | RBC<br>(10 <sup>6</sup> /uL) |
| 3201                             | -8 | 0.26                         | 0.07                          | 0.04                         | 5.93                         |
|                                  | 2  | 0.15                         | 0.02                          | 0.03                         | 5.23                         |
|                                  | 6  | 0.24                         | 0.04                          | 0.07                         | 5.34                         |
|                                  | 24 | 0.08                         | 0.02                          | 0.07                         | 5.38                         |
|                                  | 52 | 0.05                         | 0.07                          | 0.06                         | 5.22                         |
|                                  | 94 | 0.05                         | 0.04                          | 0.04                         | 5.74                         |

Test Facility Study No. 5550014

Sponsor Reference No. UTSW-Gray-SPG50-004

**Appendix 10****Appendix 1****Individual Hematology Values****5550014**

Sex: Male

| 1.68<br>X10E14<br>vg<br>Group 3  |    | Reporting Hematology |            |             |             |
|----------------------------------|----|----------------------|------------|-------------|-------------|
| Day(s) Relative to<br>Start Date |    | HGB<br>(g/dL)        | HCT<br>(%) | MCV<br>(fL) | MCH<br>(pg) |
| 3201                             | -8 | 14.7                 | 45.8       | 77.3        | 24.8        |
|                                  | 2  | 13.1                 | 40.8       | 77.9        | 25.0        |
|                                  | 6  | 13.3                 | 41.5       | 77.7        | 24.9        |
|                                  | 24 | 13.0                 | 41.0       | 76.1        | 24.2        |
|                                  | 52 | 12.8                 | 39.9       | 76.4        | 24.5        |
|                                  | 94 | 13.8                 | 42.9       | 74.8        | 24.0        |

**Appendix 10****Appendix 1****Individual Hematology Values****5550014**

Sex: Male

| 1.68<br>X10E14<br>vg<br>Group 3  |    | Reporting Hematology |            |                              |                               |
|----------------------------------|----|----------------------|------------|------------------------------|-------------------------------|
| Day(s) Relative to<br>Start Date |    | MCHC<br>(g/dL)       | RDW<br>(%) | PLT<br>(10 <sup>3</sup> /uL) | RETIC<br>(10 <sup>9</sup> /L) |
| 3201                             | -8 | 32.0                 | 13.2       | 311                          | 66.6                          |
|                                  | 2  | 32.2                 | 12.4       | 309                          | 57.6                          |
|                                  | 6  | 32.1                 | 12.1       | 381                          | 47.0                          |
|                                  | 24 | 31.8                 | 11.9       | 309                          | 41.5                          |
|                                  | 52 | 32.1                 | 12.7       | 336                          | 71.3                          |
|                                  | 94 | 32.1                 | 12.2       | 332                          | 73.1                          |

Sponsor Reference No. UTSW-Gray-SPG50-004

Test Facility Study No. 5550014

**Appendix 10****Appendix 1****Individual Hematology Values****5550014**

Sex: Male

| 1.68<br>X10E14<br>vg<br>Group 3      Day(s) Relative to<br>Start Date |    | Reporting Hematology |                    |              |
|-----------------------------------------------------------------------|----|----------------------|--------------------|--------------|
|                                                                       |    | ANISO                | PLATELET<br>CLUMPS | WBC<br>MORPH |
| 3201                                                                  | -8 | -                    | -                  | -            |
|                                                                       | 2  | -                    | -                  | -            |
|                                                                       | 6  | -                    | -                  | -            |
|                                                                       | 24 | -                    | -                  | -            |
|                                                                       | 52 | -                    | -                  | -            |
|                                                                       | 94 | -                    | -                  | -            |

Test Facility Study No. 5550014

Sponsor Reference No. UTSW-Gray-SPG50-004

**Appendix 10****Appendix 1****Individual Hematology Values****5550014**

Sex: Female

| 0<br>vg<br><br>Group 1      Day(s) Relative to<br>Start Date |    | Reporting Hematology         |                               |                                |                               |
|--------------------------------------------------------------|----|------------------------------|-------------------------------|--------------------------------|-------------------------------|
|                                                              |    | WBC<br>(10 <sup>3</sup> /uL) | NEUT<br>(10 <sup>3</sup> /uL) | LYMPH<br>(10 <sup>3</sup> /uL) | MONO<br>(10 <sup>3</sup> /uL) |
| 1701                                                         | -8 | 12.60                        | 6.04                          | 5.96                           | 0.33                          |
|                                                              | 2  | 16.37                        | 12.26                         | 3.33                           | 0.68                          |
|                                                              | 6  | 11.33                        | 6.43                          | 4.08                           | 0.52                          |
|                                                              | 24 | 8.73                         | 4.86                          | 3.47                           | 0.27                          |
|                                                              | 52 | 21.63                        | 14.83                         | 5.30                           | 1.10                          |
|                                                              | 94 | 12.83                        | 7.18                          | 5.02                           | 0.36                          |

**Appendix 10****Appendix 1****Individual Hematology Values****5550014**

Sex: Female

| 0<br>vg |                                  | Reporting Hematology         |                               |                              |                              |
|---------|----------------------------------|------------------------------|-------------------------------|------------------------------|------------------------------|
| Group 1 | Day(s) Relative to<br>Start Date | EOS<br>(10 <sup>3</sup> /uL) | BASO<br>(10 <sup>3</sup> /uL) | LUC<br>(10 <sup>3</sup> /uL) | RBC<br>(10 <sup>6</sup> /uL) |
| 1701    | -8                               | 0.16                         | 0.07                          | 0.05                         | 5.07                         |
|         | 2                                | 0.04                         | 0.02                          | 0.04                         | 4.34                         |
|         | 6                                | 0.20                         | 0.02                          | 0.07                         | 4.39                         |
|         | 24                               | 0.10                         | 0.01                          | 0.02                         | 5.01                         |
|         | 52                               | 0.21                         | 0.12                          | 0.07                         | 5.51                         |
|         | 94                               | 0.22                         | 0.02                          | 0.02                         | 5.48                         |

**Appendix 10****Appendix 1****Individual Hematology Values****5550014**

Sex: Female

| 0<br>vg |                                  | Reporting Hematology |            |             |             |
|---------|----------------------------------|----------------------|------------|-------------|-------------|
| Group 1 | Day(s) Relative to<br>Start Date | HGB<br>(g/dL)        | HCT<br>(%) | MCV<br>(fL) | MCH<br>(pg) |
| 1701    | -8                               | 12.5                 | 40.0       | 79.0        | 24.7        |
|         | 2                                | 10.8                 | 33.4       | 77.0        | 24.8        |
|         | 6                                | 10.8                 | 35.6       | 81.2        | 24.6        |
|         | 24                               | 12.4                 | 40.0       | 79.8        | 24.7        |
|         | 52                               | 13.5                 | 44.7       | 81.2        | 24.5        |
|         | 94                               | 12.9                 | 43.7       | 79.7        | 23.6        |

Sponsor Reference No. UTSW-Gray-SPG50-004

Test Facility Study No. 5550014

**Appendix 10****Appendix 1****Individual Hematology Values****5550014**

Sex: Female

| 0<br>vg |                                  | Reporting Hematology |            |                              |                               |
|---------|----------------------------------|----------------------|------------|------------------------------|-------------------------------|
| Group 1 | Day(s) Relative to<br>Start Date | MCHC<br>(g/dL)       | RDW<br>(%) | PLT<br>(10 <sup>3</sup> /uL) | RETIC<br>(10 <sup>9</sup> /L) |
| 1701    | -8                               | 31.3                 | 12.9       | 484                          | 81.5                          |
|         | 2                                | 32.2                 | 12.2       | 509                          | 64.9                          |
|         | 6                                | 30.3                 | 11.9       | 574                          | 110.2                         |
|         | 24                               | 31.0                 | 11.7       | 505                          | 77.9                          |
|         | 52                               | 30.2                 | 11.9       | 455                          | 76.2                          |
|         | 94                               | 29.6                 | 11.8       | 465                          | 87.2                          |

Test Facility Study No. 5550014

Sponsor Reference No. UTSW-Gray-SPG50-004

Sponsor Reference No. UTSW-Gray-SPG50-004

Test Facility Study No. 5550014

**Appendix 10****Appendix 1****Individual Hematology Values****5550014**

Sex: Female

| 0<br>vg<br><br>Group 1      Day(s) Relative to<br>Start Date |    | Reporting Hematology |                    |              |
|--------------------------------------------------------------|----|----------------------|--------------------|--------------|
|                                                              |    | ANISO                | PLATELET<br>CLUMPS | WBC<br>MORPH |
| 1701                                                         | -8 | -                    | -                  | -            |
|                                                              | 2  | -                    | -                  | -            |
|                                                              | 6  | -                    | -                  | -            |
|                                                              | 24 | -                    | -                  | -            |
|                                                              | 52 | -                    | -                  | -            |
|                                                              | 94 | -                    | -                  | -            |

Test Facility Study No. 5550014

Sponsor Reference No. UTSW-Gray-SPG50-004

**Appendix 10****Appendix 1****Individual Hematology Values****5550014**

Sex: Female

| 8.4<br>X10E13<br>vg<br>Group 2   |    | Reporting Hematology         |                               |                                |                               |
|----------------------------------|----|------------------------------|-------------------------------|--------------------------------|-------------------------------|
| Day(s) Relative to<br>Start Date |    | WBC<br>(10 <sup>3</sup> /uL) | NEUT<br>(10 <sup>3</sup> /uL) | LYMPH<br>(10 <sup>3</sup> /uL) | MONO<br>(10 <sup>3</sup> /uL) |
| 2701                             | -8 | 9.86                         | 5.22                          | 3.98                           | 0.42                          |
|                                  | 2  | 13.64                        | 9.08                          | 3.73                           | 0.69                          |
|                                  | 6  | 10.67                        | 5.35                          | 4.28                           | 0.81                          |
|                                  | 24 | 11.05                        | 6.46                          | 3.88                           | 0.52                          |
|                                  | 52 | 20.44                        | 13.81                         | 5.13                           | 1.00                          |
| 2702                             | 94 | 18.73                        | 11.11                         | 6.38                           | 0.85                          |
|                                  | -8 | 13.72                        | 9.72                          | 3.50                           | 0.35                          |
|                                  | 2  | 16.06                        | 12.04                         | 3.05                           | 0.88                          |
|                                  | 6  | 13.75                        | 9.53                          | 3.37                           | 0.67                          |
|                                  | 24 | 19.77                        | 15.19                         | 3.01                           | 1.32                          |
|                                  | 52 | 16.71                        | 9.97                          | 5.86                           | 0.71                          |
|                                  | 94 | 12.22                        | 6.76                          | 4.95                           | 0.44                          |

**Appendix 10****Appendix 1****Individual Hematology Values****5550014**

Sex: Female

| 8.4<br>X10E13<br>vg<br>Group 2   |    | Reporting Hematology         |                               |                              |                              |
|----------------------------------|----|------------------------------|-------------------------------|------------------------------|------------------------------|
| Day(s) Relative to<br>Start Date |    | EOS<br>(10 <sup>3</sup> /uL) | BASO<br>(10 <sup>3</sup> /uL) | LUC<br>(10 <sup>3</sup> /uL) | RBC<br>(10 <sup>6</sup> /uL) |
| 2701                             | -8 | 0.12                         | 0.05                          | 0.07                         | 5.39                         |
|                                  | 2  | 0.05                         | 0.02                          | 0.07                         | 4.67                         |
|                                  | 6  | 0.12                         | 0.01                          | 0.10                         | 4.84                         |
|                                  | 24 | 0.14                         | 0.01                          | 0.05                         | 5.11                         |
|                                  | 52 | 0.37                         | 0.06                          | 0.08                         | 4.87                         |
|                                  | 94 | 0.27                         | 0.04                          | 0.08                         | 5.68                         |
| 2702                             | -8 | 0.04                         | 0.05                          | 0.06                         | 5.16                         |
|                                  | 2  | 0.05                         | 0.01                          | 0.02                         | 4.63                         |
|                                  | 6  | 0.05                         | 0.02                          | 0.12                         | 4.76                         |
|                                  | 24 | 0.02                         | 0.01                          | 0.23                         | 4.29                         |
|                                  | 52 | 0.08                         | 0.05                          | 0.04                         | 4.94                         |
|                                  | 94 | 0.03                         | 0.03                          | 0.03                         | 5.61                         |

**Appendix 10****Appendix 1****Individual Hematology Values****5550014**

Sex: Female

| 8.4<br>X10E13<br>vg<br>Group 2   |    | Reporting Hematology |            |             |             |
|----------------------------------|----|----------------------|------------|-------------|-------------|
| Day(s) Relative to<br>Start Date |    | HGB<br>(g/dL)        | HCT<br>(%) | MCV<br>(fL) | MCH<br>(pg) |
| 2701                             | -8 | 12.8                 | 40.6       | 75.4        | 23.8        |
|                                  | 2  | 11.2                 | 35.1       | 75.2        | 24.0        |
|                                  | 6  | 11.6                 | 37.1       | 76.5        | 24.0        |
|                                  | 24 | 11.9                 | 37.6       | 73.7        | 23.4        |
|                                  | 52 | 12.1                 | 34.3       | 70.4        | 24.9        |
|                                  | 94 | 12.9                 | 40.5       | 71.3        | 22.8        |
| 2702                             | -8 | 12.4                 | 41.1       | 79.7        | 24.0        |
|                                  | 2  | 11.3                 | 36.3       | 78.4        | 24.5        |
|                                  | 6  | 11.6                 | 38.0       | 79.7        | 24.3        |
|                                  | 24 | 9.9                  | 34.3       | 79.9        | 23.2        |
|                                  | 52 | 11.8                 | 38.1       | 77.1        | 23.9        |
|                                  | 94 | 13.1                 | 42.7       | 76.2        | 23.3        |

**Appendix 10****Appendix 1****Individual Hematology Values****5550014**

Sex: Female

| 8.4<br>X10E13<br>vg<br>Group 2   |    | Reporting Hematology |            |                              |                               |
|----------------------------------|----|----------------------|------------|------------------------------|-------------------------------|
| Day(s) Relative to<br>Start Date |    | MCHC<br>(g/dL)       | RDW<br>(%) | PLT<br>(10 <sup>3</sup> /uL) | RETIC<br>(10 <sup>9</sup> /L) |
| 2701                             | -8 | 31.6                 | 11.9       | 401                          | 64.6                          |
|                                  | 2  | 31.9                 | 10.9       | 448                          | 59.7                          |
|                                  | 6  | 31.3                 | 10.8       | 561                          | 113.6                         |
|                                  | 24 | 31.7                 | 10.8       | 446                          | 52.9                          |
|                                  | 52 | 35.3                 | 11.4       | 401                          | 59.4                          |
|                                  | 94 | 31.9                 | 10.8       | 410                          | 42.8                          |
| 2702                             | -8 | 30.1                 | 13.0       | 350                          | 54.8                          |
|                                  | 2  | 31.3                 | 11.9       | 373                          | 51.8                          |
|                                  | 6  | 30.4                 | 11.9       | 459                          | 80.8                          |
|                                  | 24 | 29.0                 | 11.4       | 409                          | 77.1                          |
|                                  | 52 | 31.0                 | 13.5       | 375                          | 92.4                          |
|                                  | 94 | 30.6                 | 13.0       | 367                          | 73.4                          |

**Appendix 10****Appendix 1****Individual Hematology Values****5550014**

Sex: Female

| 8.4<br>X10E13<br>vg<br>Group 2      Day(s) Relative to<br>Start Date |    | Reporting Hematology |                    |              |
|----------------------------------------------------------------------|----|----------------------|--------------------|--------------|
|                                                                      |    | ANISO                | PLATELET<br>CLUMPS | WBC<br>MORPH |
| 2701                                                                 | -8 | -                    | -                  | -            |
|                                                                      | 2  | -                    | -                  | -            |
|                                                                      | 6  | -                    | -                  | -            |
|                                                                      | 24 | -                    | -                  | -            |
|                                                                      | 52 | -                    | -                  | -            |
|                                                                      | 94 | -                    | -                  | -            |
| 2702                                                                 | -8 | -                    | -                  | -            |
|                                                                      | 2  | -                    | -                  | -            |
|                                                                      | 6  | -                    | -                  | -            |
|                                                                      | 24 | -                    | -                  | -            |
|                                                                      | 52 | -                    | -                  | -            |
|                                                                      | 94 | -                    | -                  | -            |

Sponsor Reference No. UTSW-Gray-SPG50-004

Test Facility Study No. 5550014

**Appendix 10****Appendix 1****Individual Hematology Values****5550014**

Sex: Female

| 1.68<br>X10E14<br>vg<br>Group 3  |    | Reporting Hematology         |                               |                                |                               |
|----------------------------------|----|------------------------------|-------------------------------|--------------------------------|-------------------------------|
| Day(s) Relative to<br>Start Date |    | WBC<br>(10 <sup>3</sup> /uL) | NEUT<br>(10 <sup>3</sup> /uL) | LYMPH<br>(10 <sup>3</sup> /uL) | MONO<br>(10 <sup>3</sup> /uL) |
| 3701                             | -8 | 14.84                        | 9.42                          | 4.85                           | 0.26                          |
|                                  | 2  | 17.08                        | 12.92                         | 3.52                           | 0.43                          |
|                                  | 6  | 18.00                        | 11.27                         | 5.71                           | 0.57                          |
|                                  | 24 | 12.71                        | 8.54                          | 3.72                           | 0.32                          |
|                                  | 52 | 21.57                        | 15.94                         | 4.87                           | 0.47                          |
|                                  | 94 | 18.86                        | 13.17                         | 4.73                           | 0.57                          |

Test Facility Study No. 5550014

Sponsor Reference No. UTSW-Gray-SPG50-004

Sponsor Reference No. UTSW-Gray-SPG50-004

Test Facility Study No. 5550014

**Appendix 10****Appendix 1****Individual Hematology Values****5550014**

Sex: Female

| 1.68<br>X10E14<br>vg<br>Group 3  |    | Reporting Hematology         |                               |                              |                              |
|----------------------------------|----|------------------------------|-------------------------------|------------------------------|------------------------------|
| Day(s) Relative to<br>Start Date |    | EOS<br>(10 <sup>3</sup> /uL) | BASO<br>(10 <sup>3</sup> /uL) | LUC<br>(10 <sup>3</sup> /uL) | RBC<br>(10 <sup>6</sup> /uL) |
| 3701                             | -8 | 0.19                         | 0.08                          | 0.04                         | 5.14                         |
|                                  | 2  | 0.15                         | 0.01                          | 0.04                         | 4.68                         |
|                                  | 6  | 0.33                         | 0.05                          | 0.07                         | 4.55                         |
|                                  | 24 | 0.08                         | 0.00                          | 0.04                         | 4.72                         |
|                                  | 52 | 0.20                         | 0.04                          | 0.03                         | 4.61                         |
|                                  | 94 | 0.32                         | 0.02                          | 0.04                         | 5.32                         |

Test Facility Study No. 5550014

Sponsor Reference No. UTSW-Gray-SPG50-004

Sponsor Reference No. UTSW-Gray-SPG50-004

Test Facility Study No. 5550014

**Appendix 10****Appendix 1****Individual Hematology Values****5550014**

Sex: Female

| 1.68<br>X10E14<br>vg<br>Group 3  |    | Reporting Hematology |            |             |             |
|----------------------------------|----|----------------------|------------|-------------|-------------|
| Day(s) Relative to<br>Start Date |    | HGB<br>(g/dL)        | HCT<br>(%) | MCV<br>(fL) | MCH<br>(pg) |
| 3701                             | -8 | 12.8                 | 40.6       | 79.0        | 24.8        |
|                                  | 2  | 11.7                 | 36.2       | 77.3        | 25.1        |
|                                  | 6  | 11.0                 | 35.6       | 78.2        | 24.2        |
|                                  | 24 | 11.6                 | 37.3       | 79.1        | 24.6        |
|                                  | 52 | 11.4                 | 37.2       | 80.6        | 24.6        |
|                                  | 94 | 12.5                 | 41.8       | 78.5        | 23.5        |

Test Facility Study No. 5550014

Sponsor Reference No. UTSW-Gray-SPG50-004

Sponsor Reference No. UTSW-Gray-SPG50-004

Test Facility Study No. 5550014

**Appendix 10****Appendix 1****Individual Hematology Values****5550014**

Sex: Female

| 1.68<br>X10E14<br>vg<br>Group 3  |    | Reporting Hematology |            |                              |                               |
|----------------------------------|----|----------------------|------------|------------------------------|-------------------------------|
| Day(s) Relative to<br>Start Date |    | MCHC<br>(g/dL)       | RDW<br>(%) | PLT<br>(10 <sup>3</sup> /uL) | RETIC<br>(10 <sup>9</sup> /L) |
| 3701                             | -8 | 31.4                 | 13.7       | 297                          | 47.7                          |
|                                  | 2  | 32.4                 | 13.2       | 417                          | 44.6                          |
|                                  | 6  | 30.9                 | 13.1       | 437                          | 90.5                          |
|                                  | 24 | 31.1                 | 13.1       | 379                          | 76.1                          |
|                                  | 52 | 30.6                 | 13.0       | 387                          | 84.4                          |
|                                  | 94 | 29.9                 | 13.3       | 330                          | 73.2                          |

Test Facility Study No. 5550014

Sponsor Reference No. UTSW-Gray-SPG50-004

Sponsor Reference No. UTSW-Gray-SPG50-004

Test Facility Study No. 5550014

**Appendix 10****Appendix 1****Individual Hematology Values****5550014**

Sex: Female

| 1.68<br>X10E14<br>vg<br>Group 3      Day(s) Relative to<br>Start Date |    | Reporting Hematology |                    |              |
|-----------------------------------------------------------------------|----|----------------------|--------------------|--------------|
|                                                                       |    | ANISO                | PLATELET<br>CLUMPS | WBC<br>MORPH |
| 3701                                                                  | -8 | -                    | -                  | -            |
|                                                                       | 2  | -                    | -                  | -            |
|                                                                       | 6  | -                    | -                  | -            |
|                                                                       | 24 | -                    | -                  | -            |
|                                                                       | 52 | -                    | -                  | -            |
|                                                                       | 94 | -                    | -                  | -            |

Test Facility Study No. 5550014

Sponsor Reference No. UTSW-Gray-SPG50-004

Sponsor Reference No. UTSW-Gray-SPG50-004

Test Facility Study No. 5550014

**Appendix 10****Appendix 2****Individual Coagulation Values****5550014**

Sex: Male

| 0<br>vg<br><br>Group 1      Day(s) Relative to<br>Start Date |    | Reporting Coagulation |               |                |                     |
|--------------------------------------------------------------|----|-----------------------|---------------|----------------|---------------------|
|                                                              |    | PT<br>(sec)           | APTT<br>(sec) | FIB<br>(mg/dL) | SAMQ<br>Coagulation |
| 1201                                                         | -3 | 10.9                  | 22.7          | 327            | L+                  |
|                                                              | 2  | 11.3                  | 20.2          | 373            | N                   |
|                                                              | 7  | 10.5                  | 21.0          | 379            | N                   |
|                                                              | 24 | 10.4                  | 23.0          | 344            | N                   |
|                                                              | 52 | 10.7                  | 21.9          | 398            | N                   |
|                                                              | 94 | 10.5                  | 21.0          | 481            | N                   |

Test Facility Study No. 5550014

Sponsor Reference No. UTSW-Gray-SPG50-004

Sponsor Reference No. UTSW-Gray-SPG50-004

Test Facility Study No. 5550014

**Appendix 10****Appendix 2****Individual Coagulation Values****5550014**

Sex: Male

| 1.68<br>X10E14<br>vg<br>Group 3  |    | Reporting Coagulation |               |                |                     |
|----------------------------------|----|-----------------------|---------------|----------------|---------------------|
| Day(s) Relative to<br>Start Date |    | PT<br>(sec)           | APTT<br>(sec) | FIB<br>(mg/dL) | SAMQ<br>Coagulation |
| 3201                             | -8 | 11.1                  | 21.6          | 232            | N                   |
|                                  | 2  | 11.5                  | 19.3          | 370            | N                   |
|                                  | 6  | 10.9                  | 20.5          | 368            | N                   |
|                                  | 24 | 10.1                  | 20.8          | 420            | N                   |
|                                  | 52 | 10.7                  | 20.1          | 484            | N                   |
|                                  | 94 | 10.7                  | 19.4          | 592            | L+                  |

Test Facility Study No. 5550014

Sponsor Reference No. UTSW-Gray-SPG50-004

Sponsor Reference No. UTSW-Gray-SPG50-004

Test Facility Study No. 5550014

**Appendix 10****Appendix 2****Individual Coagulation Values****5550014**

Sex: Female

| 0<br>vg |                                  | Reporting Coagulation |               |                |                     |
|---------|----------------------------------|-----------------------|---------------|----------------|---------------------|
| Group 1 | Day(s) Relative to<br>Start Date | PT<br>(sec)           | APTT<br>(sec) | FIB<br>(mg/dL) | SAMQ<br>Coagulation |
| 1701    | -8                               | 11.2                  | 23.0          | 316            | N                   |
|         | 2                                | 12.1                  | 22.1          | 373            | N                   |
|         | 6                                | 11.4                  | 22.4          | 439            | N                   |
|         | 24                               | 10.9                  | 22.7          | 310            | N                   |
|         | 52                               | 10.7                  | 21.4          | 362            | N                   |
|         | 94                               | 11.0                  | 21.9          | 409            | N                   |

Test Facility Study No. 5550014

Sponsor Reference No. UTSW-Gray-SPG50-004

Sponsor Reference No. UTSW-Gray-SPG50-004

Test Facility Study No. 5550014

**Appendix 10****Appendix 2****Individual Coagulation Values****5550014**

Sex: Female

| 8.4<br>X10E13<br>vg<br>Group 2   |    | Reporting Coagulation |               |                |                     |
|----------------------------------|----|-----------------------|---------------|----------------|---------------------|
| Day(s) Relative to<br>Start Date |    | PT<br>(sec)           | APTT<br>(sec) | FIB<br>(mg/dL) | SAMQ<br>Coagulation |
| 2701                             | -8 | 10.8                  | 19.1          | 312            | N                   |
|                                  | 2  | 11.6                  | 18.3          | 386            | N                   |
|                                  | 6  | 11.1                  | 19.2          | 420            | N                   |
|                                  | 24 | 10.5                  | 19.4          | 300            | N                   |
|                                  | 52 | 11.2                  | 19.5          | 344            | N                   |
|                                  | 94 | 10.9                  | 17.9          | 468            | H+                  |
| 2702                             | -3 | 10.7                  | 21.2          | 389            | N                   |
|                                  | 2  | 11.6                  | 21.0          | 461            | N                   |
|                                  | 6  | 11.4                  | 21.6          | 439            | N                   |
|                                  | 24 | 11.6                  | 23.7          | 819            | N                   |
|                                  | 53 | 10.5                  | 20.2          | 402            | L++                 |
|                                  | 94 | 10.5                  | 20.5          | 427            | N                   |

Test Facility Study No. 5550014

Sponsor Reference No. UTSW-Gray-SPG50-004

Sponsor Reference No. UTSW-Gray-SPG50-004

Test Facility Study No. 5550014

**Appendix 10****Appendix 2****Individual Coagulation Values****5550014**

Sex: Female

| 1.68<br>X10E14<br>vg<br>Group 3  |    | Reporting Coagulation |               |                |                     |
|----------------------------------|----|-----------------------|---------------|----------------|---------------------|
| Day(s) Relative to<br>Start Date |    | PT<br>(sec)           | APTT<br>(sec) | FIB<br>(mg/dL) | SAMQ<br>Coagulation |
| 3701                             | -8 | 11.4                  | 21.8          | 280            | N                   |
|                                  | 2  | 11.7                  | 20.7          | 402            | N                   |
|                                  | 6  | 11.6                  | 23.0          | 461            | N                   |
|                                  | 24 | 11.5                  | 24.2          | 443            | N                   |
|                                  | 52 | 12.0                  | 22.3          | 510            | N                   |
|                                  | 94 | 11.1                  | 21.5          | 614            | L+                  |

Test Facility Study No. 5550014

Sponsor Reference No. UTSW-Gray-SPG50-004

Sponsor Reference No. UTSW-Gray-SPG50-004

Test Facility Study No. 5550014

**Appendix 10****Appendix 3****Individual Clinical Chemistry Values****5550014**

Sex: Male

| 0<br>vg |                                  | Reporting Biochemistry |              |              |              |             |                 |
|---------|----------------------------------|------------------------|--------------|--------------|--------------|-------------|-----------------|
| Group 1 | Day(s) Relative to<br>Start Date | AST<br>(U/L)           | ALT<br>(U/L) | ALP<br>(U/L) | GGT<br>(U/L) | CK<br>(U/L) | TBIL<br>(mg/dL) |
| 1201    | -8                               | 54                     | 67           | 444          | 88           | 715         | 0.15            |
|         | 2                                | 94                     | 95           | 469          | 98           | 3197        | 0.20            |
|         | 6                                | 68                     | 93           | 411          | 90           | 1691        | 0.20            |
|         | 10                               | 77                     | 83           | 385          | 86           | 1662        | 0.10            |
|         | 17                               | 57                     | 77           | 402          | 86           | 762         | 0.17            |
|         | 24                               | 41                     | 67           | 339          | 73           | 444         | 0.10            |
|         | 52                               | 43                     | 68           | 275          | 68           | 577         | 0.10            |
|         | 94                               | 53                     | 60           | 248          | 71           | 2625        | 0.09            |

Test Facility Study No. 5550014

Sponsor Reference No. UTSW-Gray-SPG50-004

Sponsor Reference No. UTSW-Gray-SPG50-004

Test Facility Study No. 5550014

**Appendix 10****Appendix 3****Individual Clinical Chemistry Values****5550014**

Sex: Male

| 0<br>vg |                                  | Reporting Biochemistry |                  |                 |                 |                 |                 |
|---------|----------------------------------|------------------------|------------------|-----------------|-----------------|-----------------|-----------------|
| Group 1 | Day(s) Relative to<br>Start Date | UREAN<br>(mg/dL)       | CREAT<br>(mg/dL) | GLUC<br>(mg/dL) | CHOL<br>(mg/dL) | TRIG<br>(mg/dL) | TPROT<br>(g/dL) |
| 1201    | -8                               | 23                     | 0.6              | 96              | 143             | 64              | 7.2             |
|         | 2                                | 19                     | 0.9              | 147             | 136             | 28              | 7.8             |
|         | 6                                | 20                     | 0.8              | 125             | 150             | 48              | 7.6             |
|         | 10                               | 24                     | 0.6              | 99              | 148             | 51              | 7.9             |
|         | 17                               | 18                     | 0.7              | 103             | 169             | 34              | 7.7             |
|         | 24                               | 19                     | 0.6              | 100             | 131             | 85              | 7.4             |
|         | 52                               | 17                     | 0.7              | 118             | 129             | 93              | 7.7             |
|         | 94                               | 16                     | 0.9              | 190             | 135             | 60              | 8.3             |

Test Facility Study No. 5550014

Sponsor Reference No. UTSW-Gray-SPG50-004

Sponsor Reference No. UTSW-Gray-SPG50-004

Test Facility Study No. 5550014

**Appendix 10****Appendix 3****Individual Clinical Chemistry Values****5550014**

Sex: Male

| 0<br>vg |                                  | Reporting Biochemistry |                |                |               |                 |                |
|---------|----------------------------------|------------------------|----------------|----------------|---------------|-----------------|----------------|
| Group 1 | Day(s) Relative to<br>Start Date | ALB<br>(g/dL)          | GLOB<br>(g/dL) | A/G<br>(ratio) | CA<br>(mg/dL) | PHOS<br>(mg/dL) | NA<br>(mmol/L) |
| 1201    | -8                               | 4.5                    | 2.7            | 1.7            | 9.0           | 4.7             | 145            |
|         | 2                                | 4.5                    | 3.3            | 1.4            | 9.4           | 5.8             | 153            |
|         | 6                                | 4.6                    | 3.0            | 1.5            | 9.5           | 5.7             | 151            |
|         | 10                               | 4.6                    | 3.3            | 1.4            | 9.8           | 6.1             | 147            |
|         | 17                               | 4.7                    | 3.0            | 1.6            | 9.8           | 6.1             | 145            |
|         | 24                               | 4.4                    | 3.0            | 1.5            | 9.3           | 5.2             | 146            |
|         | 52                               | 4.7                    | 3.0            | 1.6            | 9.5           | 5.5             | 150            |
|         | 94                               | 4.8                    | 3.5            | 1.4            | 9.9           | 5.7             | 150            |

Test Facility Study No. 5550014

Sponsor Reference No. UTSW-Gray-SPG50-004

Sponsor Reference No. UTSW-Gray-SPG50-004

Test Facility Study No. 5550014

**Appendix 10****Appendix 3****Individual Clinical Chemistry Values****5550014**

Sex: Male

| 0<br>vg |                                  | Reporting Biochemistry |                |      |
|---------|----------------------------------|------------------------|----------------|------|
| Group 1 | Day(s) Relative to<br>Start Date | K<br>(mmol/L)          | CL<br>(mmol/L) | SAMQ |
| 1201    | -8                               | 4.9                    | 103            | N    |
|         | 2                                | 5.8                    | 104            | H+   |
|         | 6                                | 5.0                    | 104            | N    |
|         | 10                               | 6.0                    | 99             | N    |
|         | 17                               | 4.9                    | 100            | N    |
|         | 24                               | 4.2                    | 102            | N    |
|         | 52                               | 4.5                    | 98             | N    |
|         | 94                               | 4.5                    | 99             | N    |

Test Facility Study No. 5550014

Sponsor Reference No. UTSW-Gray-SPG50-004

Sponsor Reference No. UTSW-Gray-SPG50-004

Test Facility Study No. 5550014

**Appendix 10****Appendix 3****Individual Clinical Chemistry Values****5550014**

Sex: Male

| 1.68<br>X10E14<br>vg<br>Group 3  |    | Reporting Biochemistry |              |              |              |             |                 |
|----------------------------------|----|------------------------|--------------|--------------|--------------|-------------|-----------------|
| Day(s) Relative to<br>Start Date |    | AST<br>(U/L)           | ALT<br>(U/L) | ALP<br>(U/L) | GGT<br>(U/L) | CK<br>(U/L) | TBIL<br>(mg/dL) |
| 3201                             | -8 | 63                     | 61           | 607          | 98           | 955         | 0.15            |
|                                  | 2  | 83                     | 93           | 544          | 93           | 1490        | 0.14            |
|                                  | 6  | 73                     | 90           | 533          | 84           | 932         | 0.11            |
|                                  | 10 | 52                     | 67           | 463          | 75           | 277         | 0.08            |
|                                  | 17 | 57                     | 67           | 460          | 70           | 360         | 0.13            |
|                                  | 24 | 44                     | 54           | 394          | 59           | 245         | 0.05            |
|                                  | 52 | 62                     | 54           | 245          | 49           | 1259        | 0.11            |
|                                  | 94 | 41                     | 48           | 159          | 48           | 579         | 0.04            |

Test Facility Study No. 5550014

Sponsor Reference No. UTSW-Gray-SPG50-004

Sponsor Reference No. UTSW-Gray-SPG50-004

Test Facility Study No. 5550014

**Appendix 10****Appendix 3****Individual Clinical Chemistry Values****5550014**

Sex: Male

| 1.68<br>X10E14<br>vg<br>Group 3  |    | Reporting Biochemistry |                  |                 |                 |                 |                 |
|----------------------------------|----|------------------------|------------------|-----------------|-----------------|-----------------|-----------------|
| Day(s) Relative to<br>Start Date |    | UREAN<br>(mg/dL)       | CREAT<br>(mg/dL) | GLUC<br>(mg/dL) | CHOL<br>(mg/dL) | TRIG<br>(mg/dL) | TPROT<br>(g/dL) |
| 3201                             | -8 | 24                     | 0.6              | 71              | 112             | 60              | 7.1             |
|                                  | 2  | 27                     | 0.7              | 79              | 114             | 31              | 7.6             |
|                                  | 6  | 23                     | 0.6              | 76              | 130             | 71              | 7.1             |
|                                  | 10 | 24                     | 0.5              | 70              | 138             | 106             | 7.3             |
|                                  | 17 | 21                     | 0.6              | 67              | 163             | 50              | 7.5             |
|                                  | 24 | 26                     | 0.6              | 63              | 129             | 149             | 7.4             |
|                                  | 52 | 23                     | 0.7              | 69              | 131             | 107             | 7.6             |
|                                  | 94 | 20                     | 0.8              | 90              | 114             | 106             | 7.8             |

Test Facility Study No. 5550014

Sponsor Reference No. UTSW-Gray-SPG50-004

Sponsor Reference No. UTSW-Gray-SPG50-004

Test Facility Study No. 5550014

**Appendix 10****Appendix 3****Individual Clinical Chemistry Values****5550014**

Sex: Male

| 1.68<br>X10E14<br>vg<br>Group 3  |    | Reporting Biochemistry |                |                |               |                 |                |
|----------------------------------|----|------------------------|----------------|----------------|---------------|-----------------|----------------|
| Day(s) Relative to<br>Start Date |    | ALB<br>(g/dL)          | GLOB<br>(g/dL) | A/G<br>(ratio) | CA<br>(mg/dL) | PHOS<br>(mg/dL) | NA<br>(mmol/L) |
| 3201                             | -8 | 4.5                    | 2.6            | 1.7            | 9.0           | 5.8             | 144            |
|                                  | 2  | 4.5                    | 3.1            | 1.5            | 9.0           | 5.3             | 150            |
|                                  | 6  | 4.5                    | 2.6            | 1.7            | 9.5           | 6.2             | 148            |
|                                  | 10 | 4.6                    | 2.7            | 1.7            | 9.8           | 6.9             | 144            |
|                                  | 17 | 4.7                    | 2.8            | 1.7            | 9.9           | 6.6             | 149            |
|                                  | 24 | 4.6                    | 2.8            | 1.6            | 9.6           | 5.3             | 147            |
|                                  | 52 | 4.6                    | 3.0            | 1.5            | 9.7           | 5.2             | 147            |
|                                  | 94 | 4.6                    | 3.2            | 1.4            | 9.6           | 4.7             | 146            |

Test Facility Study No. 5550014

Sponsor Reference No. UTSW-Gray-SPG50-004

Sponsor Reference No. UTSW-Gray-SPG50-004

Test Facility Study No. 5550014

**Appendix 10****Appendix 3****Individual Clinical Chemistry Values****5550014**

Sex: Male

| 1.68<br>X10E14<br>vg<br>Group 3      Day(s) Relative to<br>Start Date |    | Reporting Biochemistry |                |      |
|-----------------------------------------------------------------------|----|------------------------|----------------|------|
|                                                                       |    | K<br>(mmol/L)          | CL<br>(mmol/L) | SAMQ |
| 3201                                                                  | -8 | 4.4                    | 106            | N    |
|                                                                       | 2  | 4.4                    | 111            | N    |
|                                                                       | 6  | 4.6                    | 109            | N    |
|                                                                       | 10 | 5.1                    | 106            | N    |
|                                                                       | 17 | 4.8                    | 104            | N    |
|                                                                       | 24 | 4.4                    | 104            | N    |
|                                                                       | 52 | 4.5                    | 103            | N    |
|                                                                       | 94 | 3.6                    | 103            | N    |

Test Facility Study No. 5550014

Sponsor Reference No. UTSW-Gray-SPG50-004

Sponsor Reference No. UTSW-Gray-SPG50-004

Test Facility Study No. 5550014

**Appendix 10****Appendix 3****Individual Clinical Chemistry Values****5550014**

Sex: Female

| 0<br>vg |                                  | Reporting Biochemistry |              |              |              |             |                 |
|---------|----------------------------------|------------------------|--------------|--------------|--------------|-------------|-----------------|
| Group 1 | Day(s) Relative to<br>Start Date | AST<br>(U/L)           | ALT<br>(U/L) | ALP<br>(U/L) | GGT<br>(U/L) | CK<br>(U/L) | TBIL<br>(mg/dL) |
| 1701    | -8                               | 105                    | 102          | 447          | 36           | 2177        | 0.06            |
|         | 2                                | 147                    | 159          | 440          | 36           | 2806        | 0.07            |
|         | 6                                | 124                    | 159          | 425          | 40           | 963         | 0.10            |
|         | 10                               | 123                    | 180          | 437          | 55           | 1813        | 0.06            |
|         | 17                               | 69                     | 136          | 477          | 64           | 375         | 0.10            |
|         | 24                               | 76                     | 140          | 387          | 51           | 385         | 0.05            |
|         | 52                               | 131                    | 120          | 312          | 34           | 1403        | 0.05            |
|         | 94                               | 52                     | 84           | 251          | 34           | 432         | 0.08            |

Test Facility Study No. 5550014

Sponsor Reference No. UTSW-Gray-SPG50-004

Sponsor Reference No. UTSW-Gray-SPG50-004

Test Facility Study No. 5550014

**Appendix 10****Appendix 3****Individual Clinical Chemistry Values****5550014**

Sex: Female

| 0<br>vg |                                  | Reporting Biochemistry |                  |                 |                 |                 |                 |
|---------|----------------------------------|------------------------|------------------|-----------------|-----------------|-----------------|-----------------|
| Group 1 | Day(s) Relative to<br>Start Date | UREAN<br>(mg/dL)       | CREAT<br>(mg/dL) | GLUC<br>(mg/dL) | CHOL<br>(mg/dL) | TRIG<br>(mg/dL) | TPROT<br>(g/dL) |
| 1701    | -8                               | 20                     | 0.7              | 105             | 138             | 48              | 6.8             |
|         | 2                                | 22                     | 0.8              | 87              | 132             | 20              | 7.0             |
|         | 6                                | 22                     | 0.7              | 80              | 143             | 48              | 6.7             |
|         | 10                               | 21                     | 0.6              | 93              | 139             | 96              | 7.1             |
|         | 17                               | 24                     | 0.7              | 74              | 171             | 37              | 7.5             |
|         | 24                               | 22                     | 0.6              | 80              | 153             | 151             | 7.2             |
|         | 52                               | 26                     | 0.7              | 93              | 133             | 104             | 7.1             |
|         | 94                               | 14                     | 0.8              | 120             | 152             | 56              | 7.4             |

Test Facility Study No. 5550014

Sponsor Reference No. UTSW-Gray-SPG50-004

Sponsor Reference No. UTSW-Gray-SPG50-004

Test Facility Study No. 5550014

**Appendix 10****Appendix 3****Individual Clinical Chemistry Values****5550014**

Sex: Female

| 0<br>vg |                                  | Reporting Biochemistry |                |                |               |                 |                |
|---------|----------------------------------|------------------------|----------------|----------------|---------------|-----------------|----------------|
| Group 1 | Day(s) Relative to<br>Start Date | ALB<br>(g/dL)          | GLOB<br>(g/dL) | A/G<br>(ratio) | CA<br>(mg/dL) | PHOS<br>(mg/dL) | NA<br>(mmol/L) |
| 1701    | -8                               | 4.1                    | 2.7            | 1.5            | 9.1           | 5.0             | 145            |
|         | 2                                | 3.9                    | 3.1            | 1.3            | 8.9           | 4.9             | 145            |
|         | 6                                | 3.9                    | 2.8            | 1.4            | 9.2           | 5.1             | 146            |
|         | 10                               | 4.1                    | 3.0            | 1.4            | 9.1           | 5.4             | 146            |
|         | 17                               | 4.3                    | 3.2            | 1.3            | 9.4           | 5.6             | 147            |
|         | 24                               | 4.3                    | 2.9            | 1.5            | 9.5           | 4.9             | 147            |
|         | 52                               | 4.2                    | 2.9            | 1.4            | 9.5           | 3.8             | 149            |
|         | 94                               | 4.3                    | 3.1            | 1.4            | 9.5           | 5.1             | 149            |

Test Facility Study No. 5550014

Sponsor Reference No. UTSW-Gray-SPG50-004

Sponsor Reference No. UTSW-Gray-SPG50-004

Test Facility Study No. 5550014

**Appendix 10****Appendix 3****Individual Clinical Chemistry Values****5550014**

Sex: Female

| 0<br>vg |                                  | Reporting Biochemistry |                |      |
|---------|----------------------------------|------------------------|----------------|------|
| Group 1 | Day(s) Relative to<br>Start Date | K<br>(mmol/L)          | CL<br>(mmol/L) | SAMQ |
| 1701    | -8                               | 4.7                    | 106            | N    |
|         | 2                                | 4.6                    | 109            | H+   |
|         | 6                                | 4.6                    | 106            | N    |
|         | 10                               | 4.4                    | 100            | N    |
|         | 17                               | 4.8                    | 104            | N    |
|         | 24                               | 5.2                    | 107            | N    |
|         | 52                               | 4.5                    | 104            | N    |
|         | 94                               | 4.0                    | 103            | N    |

Test Facility Study No. 5550014

Sponsor Reference No. UTSW-Gray-SPG50-004

Sponsor Reference No. UTSW-Gray-SPG50-004

Test Facility Study No. 5550014

**Appendix 10****Appendix 3****Individual Clinical Chemistry Values****5550014**

Sex: Female

| 8.4<br>X10E13<br>vg<br>Group 2   |    | Reporting Biochemistry |              |              |              |             |                 |
|----------------------------------|----|------------------------|--------------|--------------|--------------|-------------|-----------------|
| Day(s) Relative to<br>Start Date |    | AST<br>(U/L)           | ALT<br>(U/L) | ALP<br>(U/L) | GGT<br>(U/L) | CK<br>(U/L) | TBIL<br>(mg/dL) |
| 2701                             | -8 | 68                     | 96           | 250          | 57           | 923         | 0.13            |
|                                  | 2  | 116                    | 156          | 305          | 60           | 995         | 0.12            |
|                                  | 6  | 50                     | 108          | 279          | 63           | 280         | 0.09            |
|                                  | 10 | 58                     | 93           | 262          | 60           | 345         | 0.10            |
|                                  | 17 | 40                     | 64           | 251          | 60           | 369         | 0.11            |
|                                  | 24 | 40                     | 71           | 204          | 58           | 184         | 0.06            |
|                                  | 52 | 50                     | 84           | 181          | 58           | 450         | 0.06            |
|                                  | 94 | 50                     | 62           | 172          | 51           | 673         | 0.05            |
| 2702                             | -8 | 60                     | 96           | 252          | 45           | 529         | 0.14            |
|                                  | 2  | 153                    | 166          | 292          | 45           | 2369        | 0.11            |
|                                  | 6  | 53                     | 118          | 369          | 45           | 804         | 0.10            |
|                                  | 10 | 46                     | 97           | 372          | 44           | 273         | 0.04            |
|                                  | 17 | 36                     | 64           | 553          | 43           | 215         | 0.08            |
|                                  | 24 | 35                     | 49           | 746          | 41           | 263         | 0.04            |
|                                  | 52 | 40                     | 76           | 289          | 38           | 600         | 0.03            |
|                                  | 94 | 42                     | 64           | 156          | 38           | 744         | 0.06            |

Test Facility Study No. 5550014

Sponsor Reference No. UTSW-Gray-SPG50-004

Sponsor Reference No. UTSW-Gray-SPG50-004

Test Facility Study No. 5550014

**Appendix 10****Appendix 3****Individual Clinical Chemistry Values****5550014**

Sex: Female

| 8.4<br>X10E13<br>vg<br>Group 2   |    | Reporting Biochemistry |                  |                 |                 |                 |                 |
|----------------------------------|----|------------------------|------------------|-----------------|-----------------|-----------------|-----------------|
| Day(s) Relative to<br>Start Date |    | UREAN<br>(mg/dL)       | CREAT<br>(mg/dL) | GLUC<br>(mg/dL) | CHOL<br>(mg/dL) | TRIG<br>(mg/dL) | TPROT<br>(g/dL) |
| 2701                             | -8 | 21                     | 0.6              | 89              | 160             | 30              | 7.2             |
|                                  | 2  | 17                     | 0.8              | 90              | 138             | 25              | 7.1             |
|                                  | 6  | 21                     | 0.6              | 75              | 155             | 40              | 7.2             |
|                                  | 10 | 23                     | 0.6              | 70              | 150             | 33              | 7.2             |
|                                  | 17 | 21                     | 0.6              | 71              | 173             | 29              | 7.2             |
|                                  | 24 | 19                     | 0.5              | 72              | 154             | 69              | 7.1             |
|                                  | 52 | 17                     | 0.5              | 82              | 144             | 57              | 6.9             |
|                                  | 94 | 17                     | 0.6              | 111             | 155             | 77              | 7.4             |
| 2702                             | -8 | 23                     | 0.8              | 63              | 155             | 49              | 7.3             |
|                                  | 2  | 23                     | 0.8              | 111             | 142             | 37              | 7.3             |
|                                  | 6  | 22                     | 0.8              | 72              | 161             | 55              | 7.2             |
|                                  | 10 | 19                     | 0.6              | 90              | 171             | 99              | 7.5             |
|                                  | 17 | 21                     | 0.7              | 90              | 169             | 69              | 7.3             |
|                                  | 24 | 20                     | 0.7              | 89              | 137             | 211             | 7.5             |
|                                  | 52 | 19                     | 0.7              | 88              | 124             | 129             | 7.7             |
|                                  | 94 | 16                     | 0.8              | 108             | 121             | 89              | 7.7             |

Test Facility Study No. 5550014

Sponsor Reference No. UTSW-Gray-SPG50-004

Sponsor Reference No. UTSW-Gray-SPG50-004

Test Facility Study No. 5550014

**Appendix 10****Appendix 3****Individual Clinical Chemistry Values****5550014**

Sex: Female

| 8.4<br>X10E13<br>vg<br>Group 2   |    | Reporting Biochemistry |                |                |               |                 |                |
|----------------------------------|----|------------------------|----------------|----------------|---------------|-----------------|----------------|
| Day(s) Relative to<br>Start Date |    | ALB<br>(g/dL)          | GLOB<br>(g/dL) | A/G<br>(ratio) | CA<br>(mg/dL) | PHOS<br>(mg/dL) | NA<br>(mmol/L) |
| 2701                             | -8 | 4.5                    | 2.7            | 1.7            | 9.4           | 4.5             | 145            |
|                                  | 2  | 4.0                    | 3.1            | 1.3            | 9.3           | 3.8             | 144            |
|                                  | 6  | 4.3                    | 2.9            | 1.5            | 9.6           | 4.6             | 147            |
|                                  | 10 | 4.4                    | 2.8            | 1.6            | 9.7           | 4.5             | 143            |
|                                  | 17 | 4.3                    | 2.9            | 1.5            | 9.7           | 4.8             | 146            |
|                                  | 24 | 4.2                    | 2.9            | 1.4            | 9.6           | 4.5             | 146            |
|                                  | 52 | 4.3                    | 2.6            | 1.7            | 9.4           | 4.0             | 144            |
|                                  | 94 | 4.1                    | 3.3            | 1.2            | 9.3           | 4.2             | 145            |
| 2702                             | -8 | 4.2                    | 3.1            | 1.4            | 9.2           | 3.8             | 146            |
|                                  | 2  | 3.9                    | 3.4            | 1.1            | 9.3           | 3.2             | 145            |
|                                  | 6  | 4.0                    | 3.2            | 1.3            | 9.3           | 3.8             | 148            |
|                                  | 10 | 4.0                    | 3.5            | 1.1            | 9.4           | 4.1             | 146            |
|                                  | 17 | 3.7                    | 3.6            | 1.0            | 9.5           | 3.4             | 147            |
|                                  | 24 | 3.4                    | 4.1            | 0.8            | 9.6           | 4.0             | 147            |
|                                  | 52 | 3.9                    | 3.8            | 1.0            | 9.4           | 4.1             | 148            |
|                                  | 94 | 4.2                    | 3.5            | 1.2            | 9.4           | 4.1             | 145            |

Test Facility Study No. 5550014

Sponsor Reference No. UTSW-Gray-SPG50-004

Sponsor Reference No. UTSW-Gray-SPG50-004

Test Facility Study No. 5550014

**Appendix 10****Appendix 3****Individual Clinical Chemistry Values****5550014**

Sex: Female

| 8.4<br>X10E13<br>vg<br>Group 2   |    | Reporting Biochemistry |                |      |
|----------------------------------|----|------------------------|----------------|------|
| Day(s) Relative to<br>Start Date |    | K<br>(mmol/L)          | CL<br>(mmol/L) | SAMQ |
| 2701                             | -8 | 4.5                    | 102            | N    |
|                                  | 2  | 4.1                    | 104            | N    |
|                                  | 6  | 4.5                    | 105            | N    |
|                                  | 10 | 5.6                    | 104            | N    |
|                                  | 17 | 4.5                    | 104            | N    |
|                                  | 24 | 4.4                    | 104            | N    |
|                                  | 52 | 4.6                    | 102            | N    |
|                                  | 94 | 4.3                    | 103            | H+   |
| 2702                             | -8 | 4.2                    | 107            | N    |
|                                  | 2  | 4.1                    | 106            | H+   |
|                                  | 6  | 4.6                    | 110            | N    |
|                                  | 10 | 5.0                    | 103            | N    |
|                                  | 17 | 4.9                    | 106            | N    |
|                                  | 24 | 4.7                    | 103            | N    |
|                                  | 52 | 4.7                    | 105            | N    |
|                                  | 94 | 5.0                    | 108            | N    |

Test Facility Study No. 5550014

Sponsor Reference No. UTSW-Gray-SPG50-004

Sponsor Reference No. UTSW-Gray-SPG50-004

Test Facility Study No. 5550014

**Appendix 10****Appendix 3****Individual Clinical Chemistry Values****5550014**

Sex: Female

| 1.68<br>X10E14<br>vg<br>Group 3  |    | Reporting Biochemistry |              |              |              |             |                 |
|----------------------------------|----|------------------------|--------------|--------------|--------------|-------------|-----------------|
| Day(s) Relative to<br>Start Date |    | AST<br>(U/L)           | ALT<br>(U/L) | ALP<br>(U/L) | GGT<br>(U/L) | CK<br>(U/L) | TBIL<br>(mg/dL) |
| 3701                             | -8 | 69                     | 52           | 214          | 51           | 426         | 0.11            |
|                                  | 2  | 77                     | 64           | 229          | 64           | 497         | 0.09            |
|                                  | 6  | 68                     | 50           | 225          | 56           | 1026        | 0.10            |
|                                  | 10 | 51                     | 44           | 218          | 53           | 202         | 0.03            |
|                                  | 17 | 75                     | 58           | 207          | 46           | 434         | 0.13            |
|                                  | 24 | 45                     | 45           | 183          | 51           | 196         | 0.08            |
|                                  | 52 | 56                     | 46           | 198          | 49           | 283         | 0.05            |
|                                  | 94 | 40                     | 44           | 182          | 42           | 249         | 0.05            |

Test Facility Study No. 5550014

Sponsor Reference No. UTSW-Gray-SPG50-004

Sponsor Reference No. UTSW-Gray-SPG50-004

Test Facility Study No. 5550014

**Appendix 10****Appendix 3****Individual Clinical Chemistry Values****5550014**

Sex: Female

| 1.68<br>X10E14<br>vg<br>Group 3  |    | Reporting Biochemistry |                  |                 |                 |                 |                 |
|----------------------------------|----|------------------------|------------------|-----------------|-----------------|-----------------|-----------------|
| Day(s) Relative to<br>Start Date |    | UREAN<br>(mg/dL)       | CREAT<br>(mg/dL) | GLUC<br>(mg/dL) | CHOL<br>(mg/dL) | TRIG<br>(mg/dL) | TPROT<br>(g/dL) |
| 3701                             | -8 | 18                     | 0.5              | 50              | 187             | 83              | 7.4             |
|                                  | 2  | 16                     | 0.6              | 108             | 172             | 39              | 7.6             |
|                                  | 6  | 14                     | 0.5              | 66              | 171             | 49              | 7.1             |
|                                  | 10 | 12                     | 0.5              | 64              | 162             | 72              | 7.2             |
|                                  | 17 | 19                     | 0.6              | 70              | 168             | 61              | 7.4             |
|                                  | 24 | 15                     | 0.5              | 70              | 141             | 97              | 7.3             |
|                                  | 52 | 10                     | 0.5              | 64              | 110             | 109             | 7.2             |
|                                  | 94 | 10                     | 0.6              | 117             | 114             | 63              | 7.4             |

Test Facility Study No. 5550014

Sponsor Reference No. UTSW-Gray-SPG50-004

Sponsor Reference No. UTSW-Gray-SPG50-004

Test Facility Study No. 5550014

**Appendix 10****Appendix 3****Individual Clinical Chemistry Values****5550014**

Sex: Female

| 1.68<br>X10E14<br>vg<br>Group 3  |    | Reporting Biochemistry |                |                |               |                 |                |
|----------------------------------|----|------------------------|----------------|----------------|---------------|-----------------|----------------|
| Day(s) Relative to<br>Start Date |    | ALB<br>(g/dL)          | GLOB<br>(g/dL) | A/G<br>(ratio) | CA<br>(mg/dL) | PHOS<br>(mg/dL) | NA<br>(mmol/L) |
| 3701                             | -8 | 4.5                    | 2.9            | 1.6            | 9.2           | 3.9             | 145            |
|                                  | 2  | 4.1                    | 3.5            | 1.2            | 9.2           | 3.6             | 144            |
|                                  | 6  | 4.1                    | 3.0            | 1.4            | 9.1           | 4.2             | 146            |
|                                  | 10 | 4.1                    | 3.1            | 1.3            | 9.2           | 4.5             | 143            |
|                                  | 17 | 4.2                    | 3.2            | 1.3            | 9.3           | 4.6             | 143            |
|                                  | 24 | 4.4                    | 2.9            | 1.5            | 9.1           | 3.6             | 144            |
|                                  | 52 | 4.1                    | 3.1            | 1.3            | 9.1           | 3.9             | 147            |
|                                  | 94 | 3.9                    | 3.5            | 1.1            | 9.2           | 3.8             | 145            |

Test Facility Study No. 5550014

Sponsor Reference No. UTSW-Gray-SPG50-004

Sponsor Reference No. UTSW-Gray-SPG50-004

Test Facility Study No. 5550014

**Appendix 10****Appendix 3****Individual Clinical Chemistry Values****5550014**

Sex: Female

| 1.68<br>X10E14<br>vg<br>Group 3  |    | Reporting Biochemistry |                |      |
|----------------------------------|----|------------------------|----------------|------|
| Day(s) Relative to<br>Start Date |    | K<br>(mmol/L)          | CL<br>(mmol/L) | SAMQ |
| 3701                             | -8 | 4.2                    | 107            | N    |
|                                  | 2  | 3.9                    | 107            | N    |
|                                  | 6  | 4.6                    | 109            | N    |
|                                  | 10 | 4.5                    | 104            | N    |
|                                  | 17 | 4.8                    | 106            | N    |
|                                  | 24 | 3.9                    | 106            | N    |
|                                  | 52 | 4.2                    | 103            | N    |
|                                  | 94 | 4.4                    | 107            | N    |

Test Facility Study No. 5550014

Sponsor Reference No. UTSW-Gray-SPG50-004

Sponsor Reference No. UTSW-Gray-SPG50-004

Test Facility Study No. 5550014

**Appendix 10****Appendix 4****Individual Urinalysis Values****5550014**

Sex: Male

| 0<br>vg |                                  | Reporting Urinalysis |       |         |      |     |     |
|---------|----------------------------------|----------------------|-------|---------|------|-----|-----|
| Group 1 | Day(s) Relative to<br>Start Date | VOLUME<br>(mL)       | COLOR | CLARITY | GLUC | BIL | KET |
| 1201    | -8                               | 6.0                  | LY    | Cld     | Neg  | Neg | Neg |
|         | 2                                | 16.0                 | LY    | Clr     | Neg  | Neg | 2+  |
|         | 6                                | 25.0                 | LY    | Cld     | Neg  | Neg | Neg |
|         | 24                               | 18.0                 | LY    | Cld     | Neg  | Neg | Neg |
|         | 52                               | 10.0                 | LY    | Cld     | Neg  | Neg | Neg |
|         | 94                               | 7.3                  | LY    | Cld     | Neg  | Neg | Neg |

Test Facility Study No. 5550014

Sponsor Reference No. UTSW-Gray-SPG50-004

**Appendix 10****Appendix 4****Individual Urinalysis Values****5550014**

Sex: Male

| 0<br>vg<br><br>Group 1      Day(s) Relative to<br>Start Date |    | Reporting Urinalysis |     |                  |      |
|--------------------------------------------------------------|----|----------------------|-----|------------------|------|
|                                                              |    | SPECIFIC<br>GRAVITY  | BLD | URINE<br>pH      | PROT |
| 1201                                                         | -8 | 1.016                | 1+  | 9.0 <sup>a</sup> | Neg  |
|                                                              | 2  | 1.027                | Neg | 7.0              | Neg  |
|                                                              | 6  | 1.012                | Neg | 9.0 <sup>a</sup> | Neg  |
|                                                              | 24 | 1.012                | Neg | 9.0 <sup>a</sup> | Neg  |
|                                                              | 52 | 1.018                | Neg | 9.0 <sup>a</sup> | Neg  |
|                                                              | 94 | 1.008                | Neg | 9.0 <sup>a</sup> | Neg  |

<sup>a</sup> [RC:Assigned value above the reportable range]

Sponsor Reference No. UTSW-Gray-SPG50-004

Test Facility Study No. 5550014

**Appendix 10****Appendix 4****Individual Urinalysis Values****5550014**

Sex: Male

| 1.68<br>X10E14<br>vg<br>Group 3  |    | Reporting Urinalysis |       |         |      |     |     |
|----------------------------------|----|----------------------|-------|---------|------|-----|-----|
| Day(s) Relative to<br>Start Date |    | VOLUME<br>(mL)       | COLOR | CLARITY | GLUC | BIL | KET |
| 3201                             | -8 | 5.0                  | LY    | Clr     | Neg  | Neg | Neg |
|                                  | 2  | 11.0                 | LY    | Clr     | Neg  | Neg | Neg |
|                                  | 6  | 18.0                 | LY    | Clr     | Neg  | Neg | Neg |
|                                  | 24 | 6.2                  | LY    | Tur     | Neg  | Neg | Neg |
|                                  | 52 | 2.4                  | LY    | Cld     | Neg  | Neg | Neg |
|                                  | 94 | 8.4                  | LY    | Tur     | Neg  | Neg | Neg |

Test Facility Study No. 5550014

Sponsor Reference No. UTSW-Gray-SPG50-004

**Appendix 10****Appendix 4****Individual Urinalysis Values****5550014**

Sex: Male

| 1.68<br>X10E14<br>vg<br>Group 3      Day(s) Relative to<br>Start Date |    | Reporting Urinalysis |     |                  |      |
|-----------------------------------------------------------------------|----|----------------------|-----|------------------|------|
|                                                                       |    | SPECIFIC<br>GRAVITY  | BLD | URINE<br>pH      | PROT |
| 3201                                                                  | -8 | 1.010                | Neg | 9.0 <sup>a</sup> | Neg  |
|                                                                       | 2  | 1.030                | Neg | 8.0              | Neg  |
|                                                                       | 6  | 1.014                | Neg | 8.5              | Neg  |
|                                                                       | 24 | 1.027                | Neg | 9.0 <sup>a</sup> | Neg  |
|                                                                       | 52 | 1.030                | Neg | 9.0 <sup>a</sup> | Neg  |
|                                                                       | 94 | 1.029                | Neg | 9.0 <sup>a</sup> | Neg  |

<sup>a</sup> [RC:Assigned value above the reportable range]

Sponsor Reference No. UTSW-Gray-SPG50-004

Test Facility Study No. 5550014

**Appendix 10****Appendix 4****Individual Urinalysis Values****5550014**

Sex: Female

| 0<br>vg<br><br>Group 1      Day(s) Relative to<br>Start Date |    | Reporting Urinalysis |       |         |      |     |     |
|--------------------------------------------------------------|----|----------------------|-------|---------|------|-----|-----|
|                                                              |    | VOLUME<br>(mL)       | COLOR | CLARITY | GLUC | BIL | KET |
| 1701                                                         | -8 | 4.0                  | LY    | Cld     | Neg  | Neg | Neg |
|                                                              | 2  | 9.6                  | LY    | Clr     | Neg  | Neg | Neg |
|                                                              | 6  | 15.0                 | LY    | Clr     | Neg  | Neg | Neg |
|                                                              | 24 | 1.4                  | LY    | Clr     | Neg  | Neg | Neg |
|                                                              | 52 | 2.2                  | LY    | Cld     | Neg  | Neg | Neg |
|                                                              | 94 | 5.2                  | LY    | Clr     | Neg  | Neg | Neg |

Test Facility Study No. 5550014

Sponsor Reference No. UTSW-Gray-SPG50-004

**Appendix 10****Appendix 4****Individual Urinalysis Values****5550014**

Sex: Female

| 0<br>vg<br><br>Group 1      Day(s) Relative to<br>Start Date |    | Reporting Urinalysis |     |                  |      |
|--------------------------------------------------------------|----|----------------------|-----|------------------|------|
|                                                              |    | SPECIFIC<br>GRAVITY  | BLD | URINE<br>pH      | PROT |
| 1701                                                         | -8 | 1.016                | 3+  | 9.0 <sup>a</sup> | 1+   |
|                                                              | 2  | 1.012                | Neg | 9.0 <sup>a</sup> | Neg  |
|                                                              | 6  | 1.015                | 1+  | 9.0 <sup>a</sup> | Neg  |
|                                                              | 24 | 1.009                | 1+  | 9.0 <sup>a</sup> | Neg  |
|                                                              | 52 | 1.008                | 1+  | 8.5              | Neg  |
|                                                              | 94 | 1.009                | 1+  | 9.0 <sup>a</sup> | Neg  |

<sup>a</sup> [RC:Assigned value above the reportable range]

Sponsor Reference No. UTSW-Gray-SPG50-004

Test Facility Study No. 5550014

**Appendix 10****Appendix 4****Individual Urinalysis Values****5550014**

Sex: Female

| 8.4<br>X10E13<br>vg<br>Group 2   |    | Reporting Urinalysis |       |         |      |     |     |
|----------------------------------|----|----------------------|-------|---------|------|-----|-----|
| Day(s) Relative to<br>Start Date |    | VOLUME<br>(mL)       | COLOR | CLARITY | GLUC | BIL | KET |
| 2701                             | -8 | 8.0                  | LY    | Cld     | Neg  | Neg | Neg |
|                                  | 2  | 2.8                  | LY    | Cld     | Neg  | Neg | Neg |
|                                  | 6  | 12.0                 | LY    | Clr     | Neg  | Neg | Neg |
|                                  | 24 | 4.4                  | LY    | Cld     | Neg  | Neg | Neg |
|                                  | 52 | 6.4                  | LY    | Tur     | Neg  | Neg | Neg |
|                                  | 94 | 5.7                  | LY    | Cld     | Neg  | Neg | Neg |
| 2702                             | -8 | 9.0                  | LY    | Cld     | Neg  | Neg | 1+  |
|                                  | 2  | 9.2                  | LY    | Cld     | Neg  | Neg | 1+  |
|                                  | 6  | 1.6                  | LY    | Cld     | Neg  | Neg | Neg |
|                                  | 24 | 2.0                  | LY    | Tur     | Neg  | Neg | Neg |
|                                  | 52 | 4.0                  | LY    | Clr     | Neg  | Neg | Neg |
|                                  | 94 | 4.7                  | LY    | Cld     | Neg  | Neg | Neg |

Test Facility Study No. 5550014

Sponsor Reference No. UTSW-Gray-SPG50-004

Sponsor Reference No. UTSW-Gray-SPG50-004

Test Facility Study No. 5550014

**Appendix 10****Appendix 4****Individual Urinalysis Values****5550014**

Sex: Female

| 8.4<br>X10E13<br>vg<br>Group 2   |    | Reporting Urinalysis |     |                  |      |
|----------------------------------|----|----------------------|-----|------------------|------|
| Day(s) Relative to<br>Start Date |    | SPECIFIC<br>GRAVITY  | BLD | URINE<br>pH      | PROT |
| 2701                             | -8 | 1.024                | Neg | 8.5              | Neg  |
|                                  | 2  | 1.020                | 3+  | 9.0 <sup>a</sup> | Neg  |
|                                  | 6  | 1.016                | Neg | 9.0 <sup>a</sup> | Neg  |
|                                  | 24 | 1.012                | Neg | 9.0 <sup>a</sup> | Neg  |
|                                  | 52 | 1.033                | Neg | 9.0 <sup>a</sup> | 1+   |
|                                  | 94 | 1.008                | Neg | 9.0 <sup>a</sup> | Neg  |
| 2702                             | -8 | 1.009                | 2+  | 9.0 <sup>a</sup> | Neg  |
|                                  | 2  | 1.014                | 1+  | 9.0 <sup>a</sup> | Neg  |
|                                  | 6  | 1.024                | 1+  | 9.0 <sup>a</sup> | 2+   |
|                                  | 24 | 1.020                | 2+  | 9.0 <sup>a</sup> | 2+   |
|                                  | 52 | 1.007                | Neg | 9.0 <sup>a</sup> | Neg  |
|                                  | 94 | 1.012                | Neg | 9.0 <sup>a</sup> | Neg  |

<sup>a</sup> [RC:Assigned value above the reportable range]

Test Facility Study No. 5550014

Sponsor Reference No. UTSW-Gray-SPG50-004

Sponsor Reference No. UTSW-Gray-SPG50-004

Test Facility Study No. 5550014

**Appendix 10****Appendix 4****Individual Urinalysis Values****5550014**

Sex: Female

| 1.68<br>X10E14<br>vg<br>Group 3  |    | Reporting Urinalysis |       |         |      |     |     |
|----------------------------------|----|----------------------|-------|---------|------|-----|-----|
| Day(s) Relative to<br>Start Date |    | VOLUME<br>(mL)       | COLOR | CLARITY | GLUC | BIL | KET |
| 3701                             | -8 | 30.0                 | LY    | Tur     | Neg  | Neg | Neg |
|                                  | 2  | 21.6                 | LY    | Clr     | Neg  | Neg | 1+  |
|                                  | 6  | 12.0                 | LY    | Tur     | Neg  | Neg | Neg |
|                                  | 24 | 4.4                  | LY    | Cld     | Neg  | Neg | Neg |
|                                  | 52 | 13.0                 | LY    | Cld     | Neg  | Neg | Neg |
|                                  | 94 | 12.7                 | LY    | Clr     | Neg  | Neg | Neg |

Test Facility Study No. 5550014

Sponsor Reference No. UTSW-Gray-SPG50-004

Sponsor Reference No. UTSW-Gray-SPG50-004

Test Facility Study No. 5550014

**Appendix 10****Appendix 4****Individual Urinalysis Values****5550014**

Sex: Female

| 1.68<br>X10E14<br>vg<br>Group 3  |    | Reporting Urinalysis |     |                  |      |
|----------------------------------|----|----------------------|-----|------------------|------|
| Day(s) Relative to<br>Start Date |    | SPECIFIC<br>GRAVITY  | BLD | URINE<br>pH      | PROT |
| 3701                             | -8 | 1.019                | 3+  | 9.0 <sup>a</sup> | Neg  |
|                                  | 2  | 1.034                | Neg | 5.5              | Neg  |
|                                  | 6  | 1.019                | 1+  | 7.5              | Neg  |
|                                  | 24 | 1.006                | Neg | 9.0 <sup>a</sup> | Neg  |
|                                  | 52 | 1.007                | 3+  | 9.0 <sup>a</sup> | Neg  |
|                                  | 94 | 1.006                | 1+  | 8.5              | Neg  |

<sup>a</sup> [RC:Assigned value above the reportable range]

Test Facility Study No. 5550014

Sponsor Reference No. UTSW-Gray-SPG50-004

**Appendix 10**

**SIGNATURE(S) FOR DOCUMENT: 5550014 - 5550014 Clinical Pathology Final Report**

|                                       |                                                                                   |                                  |
|---------------------------------------|-----------------------------------------------------------------------------------|----------------------------------|
| <b><u>Principal Investigator:</u></b> | I approve this document.                                                          |                                  |
| Name:                                 | <b>Poitout, Florence</b>                                                          |                                  |
|                                       | <i>Poitout, Florence</i>                                                          |                                  |
| <hr/>                                 |                                                                                   | <hr/>                            |
| Electronically Signed in              |  | Timestamp                        |
|                                       |                                                                                   | 03-Mar-2022 19:49:00 (UTC+00:00) |

**Appendix 11**

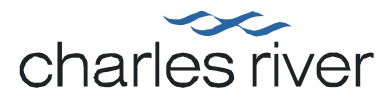

**FINAL REPORT**

**Study Phase: Biomarker Cytokines Analysis Interpretative Report**

**Test Facility Study No. 5550014**

**Sponsor Reference No. UTSW-Gray-SPG50-004**

**GLP**

**TEST FACILITY:**

Charles River Laboratories Montreal ULC  
Senneville Site (CR-SEN)

**Appendix 11****TABLE OF CONTENTS**

|                                                                              |    |
|------------------------------------------------------------------------------|----|
| LIST OF TABLES .....                                                         | 3  |
| LIST OF APPENDICES .....                                                     | 4  |
| 1. LIST OF ABBREVIATIONS .....                                               | 5  |
| 2. INTRODUCTION .....                                                        | 6  |
| 3. EXPERIMENTAL PROCEDURES .....                                             | 6  |
| 3.1. Materials and Methods .....                                             | 6  |
| 3.2. Computerized Systems .....                                              | 6  |
| 4. RESULTS AND DISCUSSIONS .....                                             | 7  |
| 4.1. Standards and Quality Control Samples for the multiplex and IP-10 ..... | 7  |
| 4.2. Study Sample .....                                                      | 7  |
| 4.3. Definition of Normal Ranges .....                                       | 8  |
| 4.4. Cytokine Results .....                                                  | 8  |
| 5. CONCLUSION .....                                                          | 10 |
| 6. REPORT APPROVAL .....                                                     | 11 |

**Appendix 11**

**LIST OF TABLES**

|         |                                                                    |
|---------|--------------------------------------------------------------------|
| Table 1 | Summary of Fold Changes and Statistical Tests of Cytokines .....12 |
|---------|--------------------------------------------------------------------|

**Appendix 11**

**LIST OF APPENDICES**

|            |                                 |    |
|------------|---------------------------------|----|
| Appendix 1 | Deviations.....                 | 18 |
| Appendix 2 | Individual Cytokine Values..... | 21 |
| Appendix 3 | AP.BMK.mkpCYT.12.....           | 25 |
| Appendix 4 | AP.BMK.mkpIP10.09.....          | 70 |

**Appendix 11****1. LIST OF ABBREVIATIONS**

This section provides abbreviations of terms and concepts that may be commonly used throughout this report.

|              |                                          |
|--------------|------------------------------------------|
| MCP1         | Monocyte chemoattractant protein-1       |
| QC           | Quality Control                          |
| tQC          | Trending Quality Control (Endogenous QC) |
| IP-10        | Interferon gamma-induced protein 10      |
| IL           | Interleukin                              |
| LLOQ         | Lower Limit of Quantitation              |
| TNF $\alpha$ | Tumor necrosis factor alpha              |
| ULOQ         | Upper Limit of Quantitation              |

**Appendix 11****2. INTRODUCTION**

This report describes the biomarker evaluation of cytokines in monkey plasma samples from Study No. 5550014 entitled “*A Single-Dose Study of AAV9/AP4M1 by Intrathecal Injection in Immunosuppressed Monkeys*”.

For the work detailed in this report, the experimental start and end dates were 08 Oct 2021, and 30 Oct 2021, respectively.

Animals were assigned to 3 groups (1/sex/group for Groups 1 and 3 and 2 females in Group 2) and administered AAV9/AP4M1 or Reference Item/Vehicle by intrathecal injection once. Group 1 animals were administered Reference Item. Animals in Groups 2 and 3 were administered  $8.4 \times 10^{13}$  and  $1.68 \times 10^{14}$  of AAV9/AP4M1, respectively. Samples for cytokines were collected from all animals on Day 1 (pre-dose, 30 min, 4 hours and 24 hours postdose).

**3. EXPERIMENTAL PROCEDURES****3.1. Materials and Methods**

The methodology and materials used for the biomarker analyses were detailed in their respective analytical procedures listed in the table below:

| Biomarker                                            | Analytical Procedure No. | Validation Study Number |
|------------------------------------------------------|--------------------------|-------------------------|
| Multiplex (IL-6, IL-8, IL-10, TNF- $\alpha$ , MCP-1) | AP.BMK.mkpCYT.12         | 3600083                 |
| IP-10                                                | AP.BMK.mkpIP10.09        | 3800698                 |

**3.2. Computerized Systems**

Critical computerized systems used in this study phase are listed below (see [Text Table 1](#)).

Text Table 1  
Computerized Systems

| System Name                                    | Version No.        | Description of Data Collected and/or Analyzed                                                                                                                                                   |
|------------------------------------------------|--------------------|-------------------------------------------------------------------------------------------------------------------------------------------------------------------------------------------------|
| Softmax Pro GxP                                | 5.4.6              | Data collection                                                                                                                                                                                 |
| Bio Plex Manager (Bio-Rad)                     | 6.1                | Data collection                                                                                                                                                                                 |
| Watson LIMS                                    | 7.6.1 HF3          | Data analysis and sample management                                                                                                                                                             |
| eInfotree                                      | 7.6 or higher      | Excel module for collection of 21 CFR Part 11 compliance requirements, security, audit trail and electronic signatures                                                                          |
| Deviation Information Library                  | 2.1                | Recording of deviation reports                                                                                                                                                                  |
| M-files®                                       | 21                 | Reporting and collection of 21 CFR Part 11 compliant signature                                                                                                                                  |
| SRS (CR-SEN in-house application built in SAS) | 1.4                | Statistical analysis                                                                                                                                                                            |
| Mesa Laboratories AmegaView CMS                | v3.0 Build 1209.08 | Continuous Monitoring System. Monitoring of standalone fridges, freezers, incubators, and selected laboratories to measure temperature, relative humidity, and CO <sub>2</sub> , as appropriate |
| Johnson Controls Metasys                       | MVE 7.0            | Building Automation System. Control of HVAC and other building systems, as well as temperature/humidity control and trending in selected laboratories and animal rooms                          |

**Appendix 11****4. RESULTS AND DISCUSSIONS****4.1. Standards and Quality Control Samples for the multiplex and IP-10**

Standard, QC preparation and acceptance criteria are described in the latest version of the analytical procedure ([Appendix 3](#) and [Appendix 4](#)). Standard curve and QC specifications are presented in [Text Table 2](#) and in [Text Table 3](#).

Text Table 2  
Multiplex Standard Curve and Quality Controls Specifications

| Cytokine | Range of the Curve<br>(pg/mL) | LLOQ<br>(pg/mL) | ULOQ<br>(pg/mL) | QC1<br>(pg/mL) | QC2<br>(pg/mL)       | QC3<br>(pg/mL) | tQC<br>(pg/mL) |
|----------|-------------------------------|-----------------|-----------------|----------------|----------------------|----------------|----------------|
| IL-6     | 37.5 to 6000.00*              | 37.50           | 4800.00         | 100.00         | 1000.00              | 3200.00        | 1103.25        |
| IL-8     | 37.5 to 6000.00               | 37.50           | 6000.00         |                |                      |                | 1143.54        |
| TNF-a    |                               |                 |                 |                |                      |                | 776.20         |
| IL-10    | 187.50 to 30000.00            | 187.50          | 30000.00        | 500.00         | 5000.00              | 16000.00       | 4122.64        |
| MCP-1    | 37.5 to 2400.00               | 37.50           | 2400.00         | 100.00         | 1000.00 <sup>a</sup> | 1600.00        | 746.71         |

\* Standard above the ULOQ is an accessory standard used to better define the upper portion of the curve.

<sup>a</sup> For MCP-1, the QC2 concentration was set at 1000.00 pg/mL instead of between 240.00 to 960.00 pg/mL. The QC2 concentration was first set at 1000.00 pg/mL because the first ULOQ tested was at 6000.00 pg/mL. Due to a plateau observed at the upper end of the standard curve, the ULOQ was decreased to 2400.00 pg/mL and the QC2 (1000.00 pg/mL) was kept. A difference of 40 pg/mL is not considered to have an impact on the validation or study sample analysis and the QC2 still monitors the day-to-day variability that could be observed in the middle part of the curve.

Text Table 3  
IP-10 Standard Curve and Quality Controls Specifications

| Range of the Curve (pg/mL) | LLOQ (pg/mL) | ULOQ (pg/mL) | QC1 (pg/mL) | QC2 (pg/mL) | QC3 (pg/mL) | tQC (pg/mL) |
|----------------------------|--------------|--------------|-------------|-------------|-------------|-------------|
| 15.00 to 750.00*           | 30.00        | 750.00       | 70.00       | 250.00      | 500.00      | 181.45      |

\* Standard below the LLOQ is an accessory standard used to better define the lower portion of the curve.

A total of two multiplex assays were performed and they both met the method acceptance criteria. All acceptable results were reported from these assays.

A total of two IP-10 assays were performed and one of the two assays did not meet the method acceptance criteria. All results were reported from the assay that met the acceptance criteria.

**4.2. Study Sample**

All study samples collected on Day 1 were analyzed within the validated ambient room temperature, 4°C, freeze/thaw and long-term stabilities for all the cytokines tested.

For IP-10 only, the following samples obtained results below the LLOQ in the initial analysis performed diluted 2-fold but there was insufficient sample volume to repeat the analysis using undiluted samples.

**Appendix 11**

| Subject | Nominal Time              |
|---------|---------------------------|
| 1701    | Day 1 4 hours postdose    |
| 1701    | Day 1 24 hours postdose   |
| 2702    | Day 1 30 minutes postdose |
| 2702    | Day 1 4 hours postdose    |
| 3701    | Day 1 4 hours postdose    |

Those samples will be noted on the results table and the calculation value will be determined as LLOQ/2.

Any residual cytokines samples were maintained for a maximum of 6 months following issuance of the first full Draft Report after which samples were Discarded as requested and authorized by the Study Director and in consultation with the Sponsor.

**4.3. Definition of Normal Ranges**

The upper limit of the normal range of concentrations was defined as the overall baseline mean (predose Day 1, values for all animals in all groups, males and females calculated separately) plus 2 standard deviations.

Fold change indicates the ratio of the measured concentrations over the upper limit of the normal range of concentration for increases and the ratio of the lower limit of the normal range of concentration over the measured concentrations for decreases. Incidence indicates the number of individual animals per group with a fold change higher or equal to 1.1-fold. Throughout the discussion, the fold increases will be expressed as “X” for example: 1.1X being equivalent to 1.1-fold increase.

Individual animal data were compared to the upper limit of the normal range, as applicable, for any observed trends (time or dose related changes). For individual animals, if a value was above this value, this increase was considered to indicate a potential AAV9/AP4M1-related effect.

The upper limit of normal range of concentrations are presented in [Text Table 4](#).

Text Table 4  
Upper Limit of the Normal Range of Concentrations (pg/mL)

|         | IL-6  | IL-8   | IL-10  | TNF- $\alpha$ | MCP-1  | IP-10  |
|---------|-------|--------|--------|---------------|--------|--------|
| Males   | 37.50 | 380.48 | 187.50 | 706.22        | 222.79 | 317.36 |
| Females | 37.50 | 135.36 | 187.50 | 249.76        | 164.09 | 192.36 |

**4.4. Cytokine Results**

The cytokines results are presented in [Table 1](#) and [Appendix 2](#) as well as [Appendix 3](#) and [Appendix 4](#).

All samples tested for IL-6 and IL-10 were below the LLOQ, therefore the administration of AAV9/AP4M1 was considered not to have an impact on the concentrations of those cytokines.

For TNF- $\alpha$  and IP-10, some quantifiable results were obtained at the predose time point as well as postdose. No increases above the upper limit of normal range could be observed, therefore the

**Appendix 11**

administration of AAV9/AP4M1 was considered not to have an impact on the concentrations of those cytokines

For IL-8, all the females administered AAV9/AP4M1 obtained increases. Animal Nos. 2701 and 3701 obtained increases at 30 minutes postdose (1.8X and 2.7X, respectively) as well as 24 hours postdose (2.9X and 1.2X, respectively). Animal No. 2702 obtained 1.6X increase at 4 hours postdose and 1.5X at 24 hours postdose. Those increases of low magnitude were considered AAV9/AP4M1-related due to their high incidence with the females. The dosed male did not obtain any increase.

For MCP-1, most of the results were quantifiable and only Female No. 2702 obtained an increase of 1.4X at 24 hours postdose. Due to the low magnitude and incidence of increases, the treatment with AAV9/AP4M1 was considered not to have an impact on the levels of MCP-1.

**Appendix 11****5. CONCLUSION**

All samples collected for the cytokines analyses were analyzed using validated immunoassay methods. Based on the acceptable performance of the standards and QCs during sample analysis, it is concluded that the concentration values reported for the study samples are valid. All samples collected during the course of this study were analyzed within validated stabilities.

No AAV9/AP4M1-related effect could be observed for IL-6, IL-10, TNF-a, MCP-1, and IP-10.

For IL-8, some AAV9/AP4M1-related increases could be observed for the females only. Despite the high incidence of the increases, their low magnitudes suggest a limited biological significance.

**Appendix 11**

**6. REPORT APPROVAL**

All electronic signatures appear at the end of the document upon finalization.

**Appendix 11****Table 1****Summary of Fold Changes and Statistical Tests of Cytokines**

|         |        |              | Group 1 0 vg |     |              |              | Group 2 8.4x10E13 vg |     |              |              | Group 3 1.68x10E14 vg |     |              |              |
|---------|--------|--------------|--------------|-----|--------------|--------------|----------------------|-----|--------------|--------------|-----------------------|-----|--------------|--------------|
| Analyte | Gender | Nominal Time | N            | Inc | Minimum Fold | Maximum Fold | N                    | Inc | Minimum Fold | Maximum Fold | N                     | Inc | Minimum Fold | Maximum Fold |
| mkpIL6  | Male   | D1 Predose   | 1            | 0   | 0.0          | 0.0          |                      |     |              |              | 1                     | 0   | 0.0          | 0.0          |
|         |        | D1M30        | 1            | 0   | 0.0          | 0.0          |                      |     |              |              | 1                     | 0   | 0.0          | 0.0          |
|         |        | D1H4         | 1            | 0   | 0.0          | 0.0          |                      |     |              |              | 1                     | 0   | 0.0          | 0.0          |
|         |        | D1H24        | 1            | 0   | 0.0          | 0.0          |                      |     |              |              | 1                     | 0   | 0.0          | 0.0          |
|         | Female | D1 Predose   | 1            | 0   | 0.0          | 0.0          | 2                    | 0   | 0.0          | 0.0          | 1                     | 0   | 0.0          | 0.0          |
|         |        | D1M30        | 1            | 0   | 0.0          | 0.0          | 2                    | 0   | 0.0          | 0.0          | 1                     | 0   | 0.0          | 0.0          |
|         |        | D1H4         | 1            | 0   | 0.0          | 0.0          | 2                    | 0   | 0.0          | 0.0          | 1                     | 0   | 0.0          | 0.0          |
|         |        | D1H24        | 1            | 0   | 0.0          | 0.0          | 2                    | 0   | 0.0          | 0.0          | 1                     | 0   | 0.0          | 0.0          |

Inc= Incidence

**Appendix 11****Table 1****Summary of Fold Changes and Statistical Tests of Cytokines**

|         |        |              | Group 1 0 vg |     |              |              | Group 2 8.4x10E13 vg |     |              |              | Group 3 1.68x10E14 vg |     |              |              |
|---------|--------|--------------|--------------|-----|--------------|--------------|----------------------|-----|--------------|--------------|-----------------------|-----|--------------|--------------|
| Analyte | Gender | Nominal Time | N            | Inc | Minimum Fold | Maximum Fold | N                    | Inc | Minimum Fold | Maximum Fold | N                     | Inc | Minimum Fold | Maximum Fold |
| mkpIL8  | Male   | D1 Predose   | 1            | 0   | 0.0          | 0.0          |                      |     |              |              | 1                     | 0   | 0.0          | 0.0          |
|         |        | D1M30        | 1            | 0   | 0.0          | 0.0          |                      |     |              |              | 1                     | 0   | 0.0          | 0.0          |
|         |        | D1H4         | 1            | 0   | 0.0          | 0.0          |                      |     |              |              | 1                     | 0   | 0.0          | 0.0          |
|         |        | D1H24        | 1            | 0   | 0.0          | 0.0          |                      |     |              |              | 1                     | 0   | 0.0          | 0.0          |
|         | Female | D1 Predose   | 1            | 0   | 0.0          | 0.0          | 2                    | 0   | 0.0          | 0.0          | 1                     | 0   | 0.0          | 0.0          |
|         |        | D1M30        | 1            | 0   | 0.0          | 0.0          | 2                    | 1   | 1.8          | 1.8          | 1                     | 1   | 2.7          | 2.7          |
|         |        | D1H4         | 1            | 0   | 0.0          | 0.0          | 2                    | 1   | 1.6          | 1.6          | 1                     | 0   | 0.0          | 0.0          |
|         |        | D1H24        | 1            | 0   | 0.0          | 0.0          | 2                    | 2   | 1.5          | 2.9          | 1                     | 1   | 1.2          | 1.2          |

Inc= Incidence

**Appendix 11****Table 1****Summary of Fold Changes and Statistical Tests of Cytokines**

|         |        |              | Group 1 0 vg |     |              |              | Group 2 8.4x10E13 vg |     |              |              | Group 3 1.68x10E14 vg |     |              |              |
|---------|--------|--------------|--------------|-----|--------------|--------------|----------------------|-----|--------------|--------------|-----------------------|-----|--------------|--------------|
| Analyte | Gender | Nominal Time | N            | Inc | Minimum Fold | Maximum Fold | N                    | Inc | Minimum Fold | Maximum Fold | N                     | Inc | Minimum Fold | Maximum Fold |
| mkpIL10 | Male   | D1 Predose   | 1            | 0   | 0.0          | 0.0          |                      |     |              |              | 1                     | 0   | 0.0          | 0.0          |
|         |        | D1M30        | 1            | 0   | 0.0          | 0.0          |                      |     |              |              | 1                     | 0   | 0.0          | 0.0          |
|         |        | D1H4         | 1            | 0   | 0.0          | 0.0          |                      |     |              |              | 1                     | 0   | 0.0          | 0.0          |
|         |        | D1H24        | 1            | 0   | 0.0          | 0.0          |                      |     |              |              | 1                     | 0   | 0.0          | 0.0          |
|         | Female | D1 Predose   | 1            | 0   | 0.0          | 0.0          | 2                    | 0   | 0.0          | 0.0          | 1                     | 0   | 0.0          | 0.0          |
|         |        | D1M30        | 1            | 0   | 0.0          | 0.0          | 2                    | 0   | 0.0          | 0.0          | 1                     | 0   | 0.0          | 0.0          |
|         |        | D1H4         | 1            | 0   | 0.0          | 0.0          | 2                    | 0   | 0.0          | 0.0          | 1                     | 0   | 0.0          | 0.0          |
|         |        | D1H24        | 1            | 0   | 0.0          | 0.0          | 2                    | 0   | 0.0          | 0.0          | 1                     | 0   | 0.0          | 0.0          |

Inc= Incidence

**Appendix 11****Table 1****Summary of Fold Changes and Statistical Tests of Cytokines**

|         |        |              | Group 1 0 vg |     |              |              | Group 2 8.4x10E13 vg |     |              |              | Group 3 1.68x10E14 vg |     |              |              |
|---------|--------|--------------|--------------|-----|--------------|--------------|----------------------|-----|--------------|--------------|-----------------------|-----|--------------|--------------|
| Analyte | Gender | Nominal Time | N            | Inc | Minimum Fold | Maximum Fold | N                    | Inc | Minimum Fold | Maximum Fold | N                     | Inc | Minimum Fold | Maximum Fold |
| mkpMCP1 | Male   | D1 Predose   | 1            | 0   | 0.0          | 0.0          |                      |     |              |              | 1                     | 0   | 0.0          | 0.0          |
|         |        | D1M30        | 1            | 0   | 0.0          | 0.0          |                      |     |              |              | 1                     | 0   | 0.0          | 0.0          |
|         |        | D1H4         | 1            | 0   | 0.0          | 0.0          |                      |     |              |              | 1                     | 0   | 0.0          | 0.0          |
|         |        | D1H24        | 1            | 0   | 0.0          | 0.0          |                      |     |              |              | 1                     | 0   | 0.0          | 0.0          |
|         | Female | D1 Predose   | 1            | 0   | 0.0          | 0.0          | 2                    | 0   | 0.0          | 0.0          | 1                     | 0   | 0.0          | 0.0          |
|         |        | D1M30        | 1            | 0   | 0.0          | 0.0          | 2                    | 0   | 0.0          | 0.0          | 1                     | 0   | 0.0          | 0.0          |
|         |        | D1H4         | 1            | 0   | 0.0          | 0.0          | 2                    | 0   | 0.0          | 0.0          | 1                     | 0   | 0.0          | 0.0          |
|         |        | D1H24        | 1            | 0   | 0.0          | 0.0          | 2                    | 1   | 1.4          | 1.4          | 1                     | 0   | 0.0          | 0.0          |

Inc= Incidence

**Appendix 11****Table 1****Summary of Fold Changes and Statistical Tests of Cytokines**

|         |        |              | Group 1 0 vg |     |              |              | Group 2 8.4x10E13 vg |     |              |              | Group 3 1.68x10E14 vg |     |              |              |
|---------|--------|--------------|--------------|-----|--------------|--------------|----------------------|-----|--------------|--------------|-----------------------|-----|--------------|--------------|
| Analyte | Gender | Nominal Time | N            | Inc | Minimum Fold | Maximum Fold | N                    | Inc | Minimum Fold | Maximum Fold | N                     | Inc | Minimum Fold | Maximum Fold |
| mkpTNFA | Male   | D1 Predose   | 1            | 0   | 0.0          | 0.0          |                      |     |              |              | 1                     | 0   | 0.0          | 0.0          |
|         |        | D1M30        | 1            | 0   | 0.0          | 0.0          |                      |     |              |              | 1                     | 0   | 0.0          | 0.0          |
|         |        | D1H4         | 1            | 0   | 0.0          | 0.0          |                      |     |              |              | 1                     | 0   | 0.0          | 0.0          |
|         |        | D1H24        | 1            | 0   | 0.0          | 0.0          |                      |     |              |              | 1                     | 0   | 0.0          | 0.0          |
|         | Female | D1 Predose   | 1            | 0   | 0.0          | 0.0          | 2                    | 0   | 0.0          | 0.0          | 1                     | 0   | 0.0          | 0.0          |
|         |        | D1M30        | 1            | 0   | 0.0          | 0.0          | 2                    | 0   | 0.0          | 0.0          | 1                     | 0   | 0.0          | 0.0          |
|         |        | D1H4         | 1            | 0   | 0.0          | 0.0          | 2                    | 0   | 0.0          | 0.0          | 1                     | 0   | 0.0          | 0.0          |
|         |        | D1H24        | 1            | 0   | 0.0          | 0.0          | 2                    | 0   | 0.0          | 0.0          | 1                     | 0   | 0.0          | 0.0          |

Inc= Incidence

**Appendix 11****Table 1****Summary of Fold Changes and Statistical Tests of Cytokines**

|         |        |              | Group 1 0 vg |     |              |              | Group 2 8.4x10E13 vg |     |              |              | Group 3 1.68x10E14 vg |     |              |              |
|---------|--------|--------------|--------------|-----|--------------|--------------|----------------------|-----|--------------|--------------|-----------------------|-----|--------------|--------------|
| Analyte | Gender | Nominal Time | N            | Inc | Minimum Fold | Maximum Fold | N                    | Inc | Minimum Fold | Maximum Fold | N                     | Inc | Minimum Fold | Maximum Fold |
| mkpIP10 | Male   | D1 Predose   | 1            | 0   | 0.0          | 0.0          |                      |     |              |              | 1                     | 0   | 0.0          | 0.0          |
|         |        | D1M30        | 1            | 0   | 0.0          | 0.0          |                      |     |              |              | 1                     | 0   | 0.0          | 0.0          |
|         |        | D1H4         | 1            | 0   | 0.0          | 0.0          |                      |     |              |              | 1                     | 0   | 0.0          | 0.0          |
|         |        | D1H24        | 1            | 0   | 0.0          | 0.0          |                      |     |              |              | 1                     | 0   | 0.0          | 0.0          |
|         | Female | D1 Predose   | 1            | 0   | 0.0          | 0.0          | 2                    | 0   | 0.0          | 0.0          | 1                     | 0   | 0.0          | 0.0          |
|         |        | D1M30        | 1            | 0   | 0.0          | 0.0          | 2                    | 0   | 0.0          | 0.0          | 1                     | 0   | 0.0          | 0.0          |
|         |        | D1H4         | 1            | 0   | 0.0          | 0.0          | 2                    | 0   | 0.0          | 0.0          | 1                     | 0   | 0.0          | 0.0          |
|         |        | D1H24        | 1            | 0   | 0.0          | 0.0          | 2                    | 0   | 0.0          | 0.0          | 1                     | 0   | 0.0          | 0.0          |

Inc= Incidence

**Appendix 11**  
**Appendix 1**

**DEVIATIONS**

All deviations that occurred during this study phase have been acknowledged by the Study Director, assessed for impact, and documented in the study records. None of the deviations were considered to have impacted the overall integrity of this study phase or the interpretation of the study phase results and conclusions.

**Appendix 11****Individual Cytokine Values Explanation Page**

| <b>Abbreviation</b> | <b>Description</b>                                                                                                                     | <b>Abbreviation</b> | <b>Description</b>                                                                                                                                            |
|---------------------|----------------------------------------------------------------------------------------------------------------------------------------|---------------------|---------------------------------------------------------------------------------------------------------------------------------------------------------------|
| ./--                | No findings / Dead                                                                                                                     | QNS                 | Quantity not sufficient                                                                                                                                       |
| CLOT                | Sample clotted                                                                                                                         | SNR                 | Sample not received                                                                                                                                           |
| NC                  | Not calculable                                                                                                                         | SNC                 | Sample not collected                                                                                                                                          |
|                     | Not reported, result out of acceptance                                                                                                 |                     |                                                                                                                                                               |
| NR                  | criteria                                                                                                                               | TNR                 | Test not reported                                                                                                                                             |
| X                   | Excluded from mean                                                                                                                     | PD                  | Post Dose                                                                                                                                                     |
| a                   | Insufficient volume for a repeat analysis at a lower dilution, LLOQ/2 (taking into consideration the dilution factor) will be reported | b                   | Result reported in singlicate. Second replicate is <LLOQ. Singlicate result within threshold, as per Analytical Procedure quantifiable result to be reported. |

Note: This is a comprehensive list of abbreviations. All of the abbreviations listed may not be applicable to this report.

Note:

For IL-6, IL-8, TNF- $\alpha$  and MCP-1

Lower Limit of Quantitation (LLOQ) = 37.50 pg/mL (75.00 pg/mL when taking the dilution factor into account), <LLOQ was assigned as 75.00/2 (37.50 pg/mL) for calculation purposes.

For IL-10

Lower Limit of Quantitation (LLOQ) = 187.50 pg/mL (375.00 pg/mL when taking the dilution factor into account), <LLOQ was assigned as 375.00/2 (187.50 pg/mL) for calculation purposes.

For IP-10

Lower Limit of Quantitation (LLOQ) = 30.00 pg/mL (60.00 pg/mL when taking the dilution factor into account), <LLOQ was assigned as 60.00/2 (30.00 pg/mL) for calculation purposes.

The upper limit of the normal range of concentrations was defined as:

The overall baseline mean (predose/pre-treatment values for all animals\* in all groups)\*\* + 2 standard deviations

Fold change was reported as:

The ratio of the measured Cytokine concentration/upper limit of the normal range of concentrations.

The fold change was calculated for each sample.

Incidence of cytokine elevations was reported as:

The number of individual animals\* per group with a fold change  $\geq 1.1$ -fold.

\*Calculations were done separately for females and males.

**Appendix 11**

\*\*If predose values were not available, values from all animals of the non-treated group(s) were used to generate the overall baseline mean.

**Dosing Information**

Dosing information is abbreviated on various data outputs; the following represents the dosing information for this study.

| <b>Group No.</b> | <b>Test Material</b> | <b>Dose Level (vg)</b> |
|------------------|----------------------|------------------------|
| 1                | Reference Item       | 0                      |
| 2                | AAV9/AP4M1           | $8.4 \times 10^{13}$   |
| 3                | AAV9/AP4M1           | $1.68 \times 10^{14}$  |

**Appendix 11****Appendix 2****Individual Cytokine Values**

## Males

Group 1 - Reference Item

Group 3 - AAV9/AP4M1 1.68x10<sup>14</sup> vg

| Animal |        |                     | IL-6    |           | Fold   |         | IL-8      |        | Fold     |           | IL-10  |       | Fold      |        |
|--------|--------|---------------------|---------|-----------|--------|---------|-----------|--------|----------|-----------|--------|-------|-----------|--------|
| Group  | Number | Occasion            | pg/mL   | Incidence | Change | pg/mL   | Incidence | Change | pg/mL    | Incidence | Change | pg/mL | Incidence | Change |
| 1      | 1201   | Day 1 - Predose     | < 75.00 | 0         | 1.0    | 216.67  | 0         | 0.6    | < 375.00 | 0         | 1.0    |       |           |        |
|        |        | Day 1 - 30 min PD   | < 75.00 | 0         | 1.0    | 83.31   | 0         | 0.2    | < 375.00 | 0         | 1.0    |       |           |        |
|        |        | Day 1 - 4 hours PD  | < 75.00 | 0         | 1.0    | 118.23  | 0         | 0.3    | < 375.00 | 0         | 1.0    |       |           |        |
|        |        | Day 1 - 24 hours PD | < 75.00 | 0         | 1.0    | 149.38  | 0         | 0.4    | < 375.00 | 0         | 1.0    |       |           |        |
| 3      | 3201   | Day 1 - Predose     | < 75.00 | 0         | 1.0    | < 75.00 | 0         | 0.1    | < 375.00 | 0         | 1.0    |       |           |        |
|        |        | Day 1 - 30 min PD   | < 75.00 | 0         | 1.0    | 87.31   | 0         | 0.2    | < 375.00 | 0         | 1.0    |       |           |        |
|        |        | Day 1 - 4 hours PD  | < 75.00 | 0         | 1.0    | 92.50   | 0         | 0.2    | < 375.00 | 0         | 1.0    |       |           |        |
|        |        | Day 1 - 24 hours PD | < 75.00 | 0         | 1.0    | < 75.00 | 0         | 0.1    | < 375.00 | 0         | 1.0    |       |           |        |

**Appendix 11****Appendix 2****Individual Cytokine Values**

## Males

Group 1 - Reference Item

Group 3 - AAV9/AP4M1 1.68x10<sup>14</sup> vg

| Animal |        |                     | MCP-1   |           | Fold   |         | TNF- $\alpha$ |        | Fold    |           | IP-10  |       | Fold      |        |
|--------|--------|---------------------|---------|-----------|--------|---------|---------------|--------|---------|-----------|--------|-------|-----------|--------|
| Group  | Number | Occasion            | pg/mL   | Incidence | Change | pg/mL   | Incidence     | Change | pg/mL   | Incidence | Change | pg/mL | Incidence | Change |
| 1      | 1201   | Day 1 - Predose     | 106.24  | 0         | 0.5    | 386.84  | 0             | 0.5    | 94.08   | 0         | 0.3    |       |           |        |
|        |        | Day 1 - 30 min PD   | 87.33   | 0         | 0.4    | < 75.00 | 0             | 0.1    | 62.70   | 0         | 0.2    |       |           |        |
|        |        | Day 1 - 4 hours PD  | 91.81   | 0         | 0.4    | < 75.00 | 0             | 0.1    | 60.57 b | 0         | 0.2    |       |           |        |
|        |        | Day 1 - 24 hours PD | 151.26  | 0         | 0.7    | < 75.00 | 0             | 0.1    | 72.48   | 0         | 0.2    |       |           |        |
| 3      | 3201   | Day 1 - Predose     | 167.13  | 0         | 0.8    | < 75.00 | 0             | 0.1    | 210.72  | 0         | 0.7    |       |           |        |
|        |        | Day 1 - 30 min PD   | 86.74   | 0         | 0.4    | < 75.00 | 0             | 0.1    | 134.55  | 0         | 0.4    |       |           |        |
|        |        | Day 1 - 4 hours PD  | < 75.00 | 0         | 0.2    | < 75.00 | 0             | 0.1    | 98.95   | 0         | 0.3    |       |           |        |
|        |        | Day 1 - 24 hours PD | 75.01   | 0         | 0.3    | 146.87  | 0             | 0.2    | 91.94   | 0         | 0.3    |       |           |        |

**Appendix 11****Appendix 2****Individual Cytokine Values**

## Females

Group 1 - Reference Item

Group 2 - AAV9/AP4M1 8.4x10<sup>13</sup> vgGroup 3 - AAV9/AP4M1 1.68x10<sup>14</sup> vg

| Group | Animal<br>Number | Occasion            | IL-6<br>pg/mL | Incidence | Fold<br>Change | IL-8<br>pg/mL | Incidence | Fold<br>Change | IL-10<br>pg/mL | Incidence | Fold<br>Change |
|-------|------------------|---------------------|---------------|-----------|----------------|---------------|-----------|----------------|----------------|-----------|----------------|
| 1     | 1701             | Day 1 - Predose     | < 75.00       | 0         | 1.0            | 115.79        | 0         | 0.9            | < 375.00       | 0         | 1.0            |
|       |                  | Day 1 - 30 min PD   | < 75.00       | 0         | 1.0            | < 75.00       | 0         | 0.3            | < 375.00       | 0         | 1.0            |
|       |                  | Day 1 - 4 hours PD  | < 75.00       | 0         | 1.0            | < 75.00       | 0         | 0.3            | < 375.00       | 0         | 1.0            |
|       |                  | Day 1 - 24 hours PD | < 75.00       | 0         | 1.0            | < 75.00       | 0         | 0.3            | < 375.00       | 0         | 1.0            |
| 2     | 2701             | Day 1 - Predose     | < 75.00       | 0         | 1.0            | < 75.00       | 0         | 0.3            | < 375.00       | 0         | 1.0            |
|       |                  | Day 1 - 30 min PD   | < 75.00       | 0         | 1.0            | 242.78        | 1         | 1.8            | < 375.00       | 0         | 1.0            |
|       |                  | Day 1 - 4 hours PD  | < 75.00       | 0         | 1.0            | < 75.00       | 0         | 0.3            | < 375.00       | 0         | 1.0            |
|       |                  | Day 1 - 24 hours PD | < 75.00       | 0         | 1.0            | 395.17        | 1         | 2.9            | < 375.00       | 0         | 1.0            |
|       | 2702             | Day 1 - Predose     | < 75.00       | 0         | 1.0            | < 75.00       | 0         | 0.3            | < 375.00       | 0         | 1.0            |
|       |                  | Day 1 - 30 min PD   | < 75.00       | 0         | 1.0            | < 75.00       | 0         | 0.3            | < 375.00       | 0         | 1.0            |
|       |                  | Day 1 - 4 hours PD  | < 75.00       | 0         | 1.0            | 212.91        | 1         | 1.6            | < 375.00       | 0         | 1.0            |
|       |                  | Day 1 - 24 hours PD | < 75.00       | 0         | 1.0            | 196.56        | 1         | 1.5            | < 375.00       | 0         | 1.0            |
| 3     | 3701             | Day 1 - Predose     | < 75.00       | 0         | 1.0            | < 75.00       | 0         | 0.3            | < 375.00       | 0         | 1.0            |
|       |                  | Day 1 - 30 min PD   | < 75.00       | 0         | 1.0            | 362.46        | 1         | 2.7            | < 375.00       | 0         | 1.0            |
|       |                  | Day 1 - 4 hours PD  | < 75.00       | 0         | 1.0            | 91.49         | 0         | 0.7            | < 375.00       | 0         | 1.0            |
|       |                  | Day 1 - 24 hours PD | < 75.00       | 0         | 1.0            | 160.17        | 1         | 1.2            | < 375.00       | 0         | 1.0            |

**Appendix 11****Appendix 2****Individual Cytokine Values**

## Females

Group 1 - Reference Item

Group 2 - AAV9/AP4M1 8.4x10<sup>13</sup> vgGroup 3 - AAV9/AP4M1 1.68x10<sup>14</sup> vg

| Group | Animal Number | Occasion            | MCP-1<br>pg/mL | Incidence | Fold<br>Change | TNF- $\alpha$<br>pg/mL | Incidence | Fold<br>Change | IP-10<br>pg/mL | Incidence | Fold<br>Change |
|-------|---------------|---------------------|----------------|-----------|----------------|------------------------|-----------|----------------|----------------|-----------|----------------|
| 1     | 1701          | Day 1 - Predose     | 112.32         | 0         | 0.7            | 207.31                 | 0         | 0.8            | 92.61          | 0         | 0.5            |
|       |               | Day 1 - 30 min PD   | 82.04          | 0         | 0.5            | < 75.00                | 0         | 0.2            | 61.76          | 0         | 0.3            |
|       |               | Day 1 - 4 hours PD  | 76.09          | 0         | 0.5            | < 75.00                | 0         | 0.2            | < 60.00 a      | 0         | 0.2            |
|       |               | Day 1 - 24 hours PD | 85.03          | 0         | 0.5            | < 75.00                | 0         | 0.2            | < 60.00 a      | 0         | 0.2            |
| 2     | 2701          | Day 1 - Predose     | 139.02         | 0         | 0.8            | < 75.00                | 0         | 0.2            | 170.20         | 0         | 0.9            |
|       |               | Day 1 - 30 min PD   | 93.56          | 0         | 0.6            | < 75.00                | 0         | 0.2            | 106.58         | 0         | 0.6            |
|       |               | Day 1 - 4 hours PD  | < 75.00        | 0         | 0.2            | < 75.00                | 0         | 0.2            | 74.60          | 0         | 0.4            |
|       |               | Day 1 - 24 hours PD | 128.61         | 0         | 0.8            | 80.93                  | 0         | 0.3            | 125.76         | 0         | 0.7            |
|       | 2702          | Day 1 - Predose     | 149.59         | 0         | 0.9            | < 75.00                | 0         | 0.2            | 77.43          | 0         | 0.4            |
|       |               | Day 1 - 30 min PD   | 144.25         | 0         | 0.9            | < 75.00                | 0         | 0.2            | < 60.00 a      | 0         | 0.2            |
|       |               | Day 1 - 4 hours PD  | 115.44         | 0         | 0.7            | < 75.00                | 0         | 0.2            | < 60.00 a      | 0         | 0.2            |
|       |               | Day 1 - 24 hours PD | 237.71         | 1         | 1.4            | < 75.00                | 0         | 0.2            | 103.43         | 0         | 0.5            |
| 3     | 3701          | Day 1 - Predose     | 123.32         | 0         | 0.8            | < 75.00                | 0         | 0.2            | 99.34          | 0         | 0.5            |
|       |               | Day 1 - 30 min PD   | 103.24         | 0         | 0.6            | < 75.00                | 0         | 0.2            | 75.71          | 0         | 0.4            |
|       |               | Day 1 - 4 hours PD  | < 75.00        | 0         | 0.2            | < 75.00                | 0         | 0.2            | < 60.00 a      | 0         | 0.2            |
|       |               | Day 1 - 24 hours PD | 100.14         | 0         | 0.6            | < 75.00                | 0         | 0.2            | 61.67          | 0         | 0.3            |

## Appendix 11

### Appendix 3

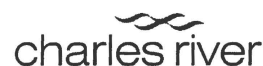

|                                                                                                                                                                                                                                                                                                                                                    |                                       |                                           |
|----------------------------------------------------------------------------------------------------------------------------------------------------------------------------------------------------------------------------------------------------------------------------------------------------------------------------------------------------|---------------------------------------|-------------------------------------------|
| <b>Title:</b><br><b>LUMINEX METHOD FOR THE QUANTITATIVE DETECTION OF IL-1<math>\beta</math>, IL-1RA, IL-6, IL-10, IL-12/23 (p40), IL-15, IL-18, IFN-<math>\gamma</math>, TNF-<math>\alpha</math>, G-CSF, MCP-1, MIP-1<math>\beta</math>, GM-CSF, IL-2, IL-4, IL-5, IL-8, IL-13 AND IL-17A IN CYNOMOLGUS MONKEY PLASMA USING THE MAGNETIC BEADS</b> | <b>AP Number:</b><br>AP.BMK.mkpCYT.12 | <b>Effective Date:</b><br>Signature of AP |
|                                                                                                                                                                                                                                                                                                                                                    | CR-SEN/SHB                            | Supersedes:<br>19-Mar-2019                |
| <b>Prepared by:</b><br>Marc-André Roy<br>Scientist I, Immunology <sup>Ⓐ</sup>                                                                                                                                                                                                                                                                      | <i>Stephane C</i>                     | <b>Date:</b><br>12-Nov-2020               |
| <b>Verified by:</b><br>Sonia Ménard<br>Research Scientist I, Biomarkers                                                                                                                                                                                                                                                                            | <i>Sonia</i>                          | <b>Date:</b><br>12 Nov 2020               |
| <b>Management Approval:</b><br>Annie St-Pierre<br>Senior Research Scientist II, Biomarkers                                                                                                                                                                                                                                                         | <i>Annie St-Pierre</i>                | <b>Date:</b><br>12 NOV 2020               |

#### 1.0 Purpose

To describe a method to determine the concentration of IL-1 $\beta$ , IL-1RA, IL-6, IL-10, IL-12/23 (p40), IL-15, IL-18, IFN- $\gamma$ , TNF- $\alpha$ , G-CSF, MCP-1, MIP-1 $\beta$ , GM-CSF, IL-2, IL-4, IL-5, IL-8, IL-13 and IL-17A in cynomolgus monkey plasma by Luminex.

#### 2.0 Scope

This procedure applies to Luminex assays undertaken in the Biomarkers department.

#### 3.0 Responsibilities

All staff performing this assay are responsible for compliance with this analytical procedure.

#### 4.0 Required forms

- Appendix 1 Cytokine Multiplex Spiking Sheet (Example of document)
- Appendix 2a Cytokine Multiplex Assay Sheet (Plate washer)
- Appendix 2b Cytokine Multiplex Assay Sheet (Manual wash)
- Appendix 3 Daily Solution preparation Sheet (Example of document)  
**Note: Appendix # 2 of CACI-001 can be used as well.**
- Appendix 4 Solution preparation Sheet (Example of document)  
**Note: Appendix # 1 of CACI-001 can be used as well.**
- Appendix 5 Assay Instructions Sheet (Example of document)
- Appendix 6 Cytokine Multiplex Spiking Preparation of tQC (Example of document)
- Appendix 7 Sample Analysis Instruction Sheet (Example of spreadsheet).  
**Note: this appendix is to be used when assay includes sample(s) not analyzed for all cytokines stated in Assay Instructions Sheet (Appendix 5).**

<sup>Ⓐ</sup> Stéphane Martin signed on behalf of Marc-André Roy. SMA/12-Nov-2020

**Appendix 11**  
**Appendix 3**

|                                |                                    |                            |                    |
|--------------------------------|------------------------------------|----------------------------|--------------------|
| AP Number:<br>AP.BMK.mkpCYT.12 | Effective Date:<br>Signature of AP | Supersedes:<br>19-Mar-2019 | Page 2 of 18 pages |
|--------------------------------|------------------------------------|----------------------------|--------------------|

**5.0 Materials/Equipment/Reagents**

Materials can be substituted provided the same specifications are met.

The procedure may require other general laboratory supplies commonly used in Laboratory Sciences.

If the lot# of a reagent is recorded, the recording of the inventory # is not critical, since it is considered to be for information or reference purposes only. The only situation that would make the inventory # critical is for reagents of the same lot that have an expiry date based on the receipt date.

**5.1 Materials/Equipment****5.1.1 Non Disposable/Instrumentation**

Centrifuge  
Pipettes (multi-channel, micro)  
Vortex mixer  
Bio Plex Suspension Array  
Bio Plex Manager™ Software  
Watson Laboratory Information Management System (LIMS)  
Automatic plate washer for Magnetic beads (Bio-Plex PRO II units)  
Handheld magnetic washer  
Orbital plate shaker (orbit 4mm)  
Titer plate shaker  
Serologic pipettes  
Sonicating bath  
Waterbath

**5.1.2 Disposable**

Aluminum foil  
Tubes (polypropylene, various caps, various size)  
Ultra-pure water (UPW)  
Pipette tips (various sizes)  
Non-sterile solution basins  
Parafilm  
Absorbent paper  
Auto-sticker plate sealers  
96-well plate, polypropylene, (used for pre-loading).

**5.2 Kit Components****Notes:**

- i. Concentration of kit components / reagents can vary from lot to lot. If the kit lot changes, but the critical reagents (Non-Human Primate Cytokine Standard, Serum Matrix, Non-Human Primate Cytokines Detection Antibodies, Streptavidin-Phycoerythrin or Non-Human Primate Cytokine Antibody-Immobilized Beads) are the same as the kit reagents already qualified (from another kit lot), then the qualification of the new critical reagents is not required.
- ii. When possible, the same kit lot number should be used for the entire study to prevent any

## Appendix 11

### Appendix 3

|                                |                                    |                            |                    |
|--------------------------------|------------------------------------|----------------------------|--------------------|
| AP Number:<br>AP.BMK.mkpCYT.12 | Effective Date:<br>Signature of AP | Supersedes:<br>19-Mar-2019 | Page 3 of 18 pages |
|--------------------------------|------------------------------------|----------------------------|--------------------|

variability in the results. New kit lots should be qualified as per SOP BMK-004 prior to use. In the event where the same lot of kit cannot be used throughout the study and lot-to-lot variability is present, this should be considered in the interpretation of the results.

- iii. All kit reagents should be stored in a refrigerator set to maintain 4°C until the expiration date printed on the label.
- iv. All kit reagents should be brought to ambient room temperature (RT) prior to use.

#### **Non-Human Primate Cytokine Kit**

**(Millipore cat# PRCYTOMAG-40K-XX, where XX denotes the number of cytokines included in the panel, refer to Appendix #5 and appropriate Study plan for the actual list of cytokines to be analyzed)**

| Reagents provided                                   | Catalogue No. | Quantity         | Use                 |
|-----------------------------------------------------|---------------|------------------|---------------------|
| Non-Human Primate Cytokine Standard                 | MXPR8040*     | 1 vial           | Lyophilized         |
| Non-Human Primate Cytokine Quality Controls 1 and 2 | MXPR6040      | 2 vials          | <b>Do Not Use</b>   |
| Serum Matrix                                        | MXPRSM*       | 1 vial           | Lyophilized         |
| 96-well Plate                                       | N/Ap**        | 1 plate          | <b>Ready to use</b> |
| Assay Buffer                                        | L-AB          | 1 Bottle (30mL)  | <b>Ready to use</b> |
| Wash Buffer (10X)                                   | L-WB          | 1 Bottle (60mL)  | To be diluted       |
| Non-Human Primate Cytokines Detection Antibodies    | MXPR1040-2    | 1 Bottle (3.2mL) | <b>Ready to use</b> |
| Streptavidin-Phycoerythrin                          | L-SAPE4       | 1 Bottle (3.2mL) | <b>Ready to use</b> |
| Bead diluent                                        | LBD           | 1 Bottle (3.5mL) | To be diluted       |
| Mixing Bottle                                       | N/Ap          | 1 Bottle         | <b>Ready to use</b> |

\*1 additional vial of Non-Human Primate Cytokine Standard should be ordered per kit. 3 additional vials of Serum Matrix should be ordered per kit.

\*\*Note that lot number/expiry is not always provided by supplier, as the loading plate is not a pre-coated plate and the plate is included in the kit, there is no need to have a prompt to record the lot and expiry date.

#### **Non-Human Primate Cytokine Antibody-Immobilized Beads**

**Refer to Appendix #5 and appropriate Study plan for the list of cytokines to be analyzed**

| Bead/Analyte name   | Catalogue No. (50X concentration, 90µL each) |
|---------------------|----------------------------------------------|
| Anti-IL-1β          | HCYL1B-MAG                                   |
| Anti-IL-1RA         | HIL1RA-MAG                                   |
| Anti-IL-6           | HCYL6-MAG                                    |
| Anti-IL-10          | PRIL10-MAG                                   |
| Anti-IL-12/23 (p40) | PRIL12P40-MAG                                |
| Anti-IL-15          | HIL15-MAG                                    |
| Anti-IL-18          | PRIL18-MAG                                   |
| Anti-TNF-α          | PRTNFA-MAG                                   |
| Anti-IFN-γ          | PRIFNG-MAG                                   |

## Appendix 11

### Appendix 3

|                                |                                    |                            |                    |
|--------------------------------|------------------------------------|----------------------------|--------------------|
| AP Number:<br>AP.BMK.mkpCYT.12 | Effective Date:<br>Signature of AP | Supersedes:<br>19-Mar-2019 | Page 4 of 18 pages |
|--------------------------------|------------------------------------|----------------------------|--------------------|

| Bead/Analyte name | Catalogue No. (50X concentration, 90µL each) |
|-------------------|----------------------------------------------|
| Anti-MCP-1        | HCYMCP1-MAG                                  |
| Anti-MIP-1β       | HMIP1B-MAG                                   |
| Anti-G-CSF        | HGCSF-MAG                                    |
| Anti-GM-CSF       | PRGMCSF-MAG                                  |
| Anti-IL-2         | PRIL2-MAG                                    |
| Anti-IL-4         | HIL4-MAG                                     |
| Anti-IL-5         | HIL5-MAG                                     |
| Anti-IL-13        | PRIL13-MAG                                   |
| Anti-IL-17A       | HIL17-MAG                                    |
| Anti-IL-8         | HICYIL8-MAG                                  |

#### 5.3 Matrix(ces) (used to prepare trending QC)

Species: Cynomolgus Monkey plasma  
 Anticoagulant: EDTA  
 Supplier: Charles River or BioIVT  
 Lot number: to be documented in raw data  
 Storage: in a freezer set to maintain -20°C or -80°C (as appropriate)  
 Expiry: SIP (Stability in progress). Refer to validation box.

#### 5.4 Other reagents

- Sheath fluid (Luminex Catalogue no. 40-50000 or Bio-Rad Catalogue no. 171-000055)

#### 6.0 Preparation of Assay Reagents

##### Notes:

- Volumes described for any preparation may be scaled up or down proportionally as long as the target concentration is not changed. All changes must be documented in raw data.
- Bring all reagents to ambient RT before use.
- For the preparation of daily solutions, pipettes should be recorded on Appendix #2.

#### 6.1 Preparation of kit reagents

##### 6.1.1 Wash buffer cytokines (code: mkpCYT WB)

Record the preparation on appendix 4

- Add 540 mL of UPW to an appropriate container.
- Add the contents of the Wash Buffer Concentrate (10X) bottle (60 mL per bottle) and mix well by inversion.
- Store in a refrigerator set to maintain 4°C for a maximum of 1 month.
- Use at ambient RT during the assay.

##### 6.1.2 Antibody-Immobilized Beads Working Solution (code: ABWS)

**Note: if not all cytokines are needed to be analyzed, Bead Diluent should be used to replace the missing antibody-bead volume. The total volume of the solution needs to be 3.000 mL. Dilution 1/50.**

**Appendix 11**  
**Appendix 3**

|                                |                                    |                            |                    |
|--------------------------------|------------------------------------|----------------------------|--------------------|
| AP Number:<br>AP.BMK.mkpCYT.12 | Effective Date:<br>Signature of AP | Supersedes:<br>19-Mar-2019 | Page 5 of 18 pages |
|--------------------------------|------------------------------------|----------------------------|--------------------|

**Record the preparation on Appendix #3**

- Sonicate the antibody-bead bottles for 30 seconds and then vortex for 1 minute. **Refer to Appendix #5 for the list of cytokines to be analyzed.**
- For example: If 19 cytokines: Add 1.860 mL of Bead Diluent to the mixing bottle and 60 µL from each antibody bead tube to the mixing bottle; vortex well.
- Each well requires 25 µL of the diluted beads.
- This solution is prepared on the day of the assay.

**6.1.3 Preparation Serum Matrix (code: **mkpSM**)**

Record the preparation on appendix 1

- Reconstitute 1 vial of Lyophilized Serum Matrix with 1mL of UPW
- Vortex well.
- Allow at least 10 minutes for complete reconstitution.
- Leftover reconstituted Serum Matrix may be stored in a freezer set to maintain -20°C for up to 1 month. Discard if remaining volume is not needed or insufficient for subsequent assays.

**6.2 Preparation of the Non-Human Primate Cytokine Standards and Quality Control Samples**

Notes:

- i. All changes should be documented.
- ii. Preparation is performed at ambient RT.

**6.2.1 Reconstitution of the Non-Human Primate Cytokine Standard (code: **Stock**)**

- Reconstitute the Non-Human Primate Cytokine Standard vial with 250 µL of UPW.
- Invert the vial several times to mix; vortex the vial for 10 seconds.
- Allow the vial to sit for at least 5 minutes for complete reconstitution and then transfer as soon as possible into a polypropylene tube and promptly start the spiking.
- The standard stock should be used to prepare the Standards and QCs within **one hour of the reconstitution finish time.**
- Record preparation on Appendix 1.

**6.2.2 Preparation of standards and QCs**

- Standards are prepared using the standard stock (Code: Stock) as the high standard, and doing serial dilutions using the Serum matrix (Code: SM) as a diluent.
- The diluted standards should be prepared on the day of the assay and used (**refer to the start time of the incubation with the beads**) within **one hour of finish time.**
- Record preparation on Appendix 1.
- The following range should be kept for the preparation of the QCs except for the MCP-1 QC2
  - Low (QC1): Less than or equal to 3 times the LLOQ (but >LLOQ).
  - Medium (QC2) \*: 10 - 40% of the ULOQ.
  - High (QC3): 50 - 80% of the ULOQ.

\* During validation: For MCP-1, the QC2 concentration was set at 1000.00 pg/mL instead of between 240.00 to 960.00 pg/mL. The QC2 concentration was first set at 1000.00

## Appendix 11

### Appendix 3

|                                |                                    |                            |                    |
|--------------------------------|------------------------------------|----------------------------|--------------------|
| AP Number:<br>AP.BMK.mkpCYT.12 | Effective Date:<br>Signature of AP | Supersedes:<br>19-Mar-2019 | Page 6 of 18 pages |
|--------------------------------|------------------------------------|----------------------------|--------------------|

pg/mL because the first ULOQ tested was at 6000.00 pg/mL. Due to a plateau observed at the upper end of the standard curve, the ULOQ was decreased to 2400.00 pg/mL and the QC2 (1000.00 pg/mL) was kept. A difference of 40 pg/mL is not considered to have an impact on the validation or study sample analysis and the QC2 still monitors the day-to-day variability that could be observed in the middle part of the curve.

#### 7.0 Preparation of trending QC (tQC) using diluted matrix(ces) or spiked matrix(ces) using Standard Stock

The selected lot of monkey plasma must be used diluted at least 1/2 with Serum matrix (the tQC can be matrix(ces) with appropriate endogenous concentration or if endogenous concentration cannot be found for all the cytokines tested, the tQC will be a matrix(ces) diluted 2-fold and then spiked at appropriate concentration). Refer to BMK-004 for preparation details.

- Aliquot the chosen lot(s) neat into appropriately labeled polypropylene tubes and store in a freezer set to maintain -20°C or -80°C (as appropriate). **The expiry date on the label of the neat matrix(ces) should be SIP (stability in progress).**
- Stability of tQC samples will be monitored and deemed acceptable based on the assay performance when analyzed using a qualified lot of kit.
- Diluted or spiked tQC samples should be prepared on wet ice on the day of the assay.
- Record preparation of tQC samples on Appendix #6.

**Validation Summary Table:**

| Based on validation Study 3600083 |                                                                                                                                                                                                                                                                                                                                                                                                                                                                                                                                                                                                                                                                                                                                                                                                                                                                                                                                                                                                                                                    |
|-----------------------------------|----------------------------------------------------------------------------------------------------------------------------------------------------------------------------------------------------------------------------------------------------------------------------------------------------------------------------------------------------------------------------------------------------------------------------------------------------------------------------------------------------------------------------------------------------------------------------------------------------------------------------------------------------------------------------------------------------------------------------------------------------------------------------------------------------------------------------------------------------------------------------------------------------------------------------------------------------------------------------------------------------------------------------------------------------|
| Parameter                         | Results                                                                                                                                                                                                                                                                                                                                                                                                                                                                                                                                                                                                                                                                                                                                                                                                                                                                                                                                                                                                                                            |
| Validated range                   | Refer to table on Appendix #5                                                                                                                                                                                                                                                                                                                                                                                                                                                                                                                                                                                                                                                                                                                                                                                                                                                                                                                                                                                                                      |
| Dilution in Serum Matrix diluent  | <p><u>Based on Parallelism:</u></p> <p>IL-1<math>\beta</math>, IL-1RA and IL-8= 2 to 64-fold<br/> MIP-1<math>\beta</math>=2 to 16-fold<br/> IL-6*, IL-10*, TNF-<math>\alpha</math>, IFN-<math>\gamma</math> = 2 to 4-fold<br/> IL-12/23(p40), IL-13, MCP-1*, G-CSF = 2-fold</p> <p><u>Based on the Linearity of dilution :</u></p> <p>IL-2= 5 to 128-fold but MRD set at 2-fold<br/> IL-4= 4 to 64-fold but MRD set at 2-fold<br/> IL-5= 2 to 256-fold<br/> IL-15 and IFN-<math>\gamma</math>= 2 to 198.77-fold<br/> IL-17A= 8 to 256-fold but MRD set at 2-fold<br/> GM-CSF and IL-18= no conclusive results; MRD 2-fold</p> <p><b>*The appropriate dilution range should be determined based on expected IL-6, IL-10, and MCP-1 values. Samples can be diluted using one of the 2 options listed below but options cannot be combined within the same study.</b></p> <p><b>Option 1:</b> Sample can be diluted as stated above<br/> <b>Option 2:</b> Samples can be diluted from 8 to 64-fold for IL-6 and IL-10 and 8 to 32-fold for MCP-1.</p> |

## Appendix 11

### Appendix 3

|                                |                                    |                            |                    |
|--------------------------------|------------------------------------|----------------------------|--------------------|
| AP Number:<br>AP.BMK.mkpCYT.12 | Effective Date:<br>Signature of AP | Supersedes:<br>19-Mar-2019 | Page 7 of 18 pages |
|--------------------------------|------------------------------------|----------------------------|--------------------|

| Based on validation Study 3600083            |                                                                                                                                                                                                                                                  |
|----------------------------------------------|--------------------------------------------------------------------------------------------------------------------------------------------------------------------------------------------------------------------------------------------------|
| Parameter                                    | Results                                                                                                                                                                                                                                          |
| Short term matrix stability (at ambient RT)  | IL-1 $\beta$ , IL-2, IL-4, IL-5, IL-12/23(p40), IL-13, IL-15, IL-17A, IFN- $\gamma$ , GM-CSF= 6 hrs 57 min<br>IL-1RA, IL-6, IL-8, IL-10, MIP-1 $\beta$ , G-CSF= 6 hrs 30 min<br>TNF- $\alpha$ = 6 hrs 7 min<br>IL-18 and MCP-1= 5 hrs 51 min     |
| Short term matrix stability (at 4°C/wet ice) | IL-1 $\beta$ , IL-2, IL-4, IL-5, IL-12/23(p40), IL-13, IL-15, IL-17A, IFN- $\gamma$ , GM-CSF, TNF- $\alpha$ and IL-18= 24 hrs 7 min<br>IL-1RA, IL-6, IL-8, IL-10, MIP-1 $\beta$ , G-CSF= 24 hrs 2 min<br>MCP-1= 24 hrs 25 min                    |
| Freeze-thaw matrix stability at -20°C        | IL-1 $\beta$ , IL-5, IL-13, IL-15, GM-CSF, IL-1RA, IL-6, IL-8, IL-10, MIP-1 $\beta$ , TNF- $\alpha$ , GM-CSF and IL-18= 4 Freeze-Thaw cycles<br>IL-2, IL-4, IL-12/23(p40), IL-17A, IFN- $\gamma$ and MCP-1= 5 Freeze-Thaw cycles                 |
| Freeze-thaw matrix stability at -80°C        | IL-1 $\beta$ , IL-4, IL-12/23(p40), IL-13, IL-5, IL-15, IL-17A, IFN- $\gamma$ , GM-CSF, IL-1RA, IL-6, IL-8, IL-10, MIP-1 $\beta$ , TNF- $\alpha$ , G-CSF and IL-18= 4 Freeze-Thaw cycles<br>IL-2, and MCP-1= 5 Freeze-Thaw cycles                |
| Long term matrix stability at -20°C          | IL-1 $\beta$ , IL-2, IL-4, IL-5, IL-12/23(p40), IL-13, IL-15, IL-17A, IFN- $\gamma$ , GM-CSF, IL-1RA, IL-6, IL-8, IL-10, MIP-1 $\beta$ , TNF- $\alpha$ and G-CSF = 90 days<br>IL-18= 29 days<br>MCP-1= 92 days                                   |
| Long term matrix stability at -80 °C         | IL-2, IL-4, IL-5, IL-12/23(p40), IL-13, IL-15, IL-17A, GM-CSF, IL-8, IL-10, MIP-1 $\beta$ , G-CSF = 90 days<br>IL-18= 88 days<br>IL-1RA, TNF- $\alpha$ , IFN- $\gamma$ = 173 days<br>IL-6= 195 days<br>IL-1 $\beta$ = 264 days<br>MCP-1= 92 days |

#### 8.0 Assay procedure

##### Notes:

- Refer to Appendix #5 for the Cytokine Multiplex Assay Sheet to be used for the assay procedure (Appendix 2a or Appendix 2b).
- Pipettes used for the assay procedure, preparation of standards, QCs, tQCs, diluted samples and daily solutions will be recorded on Appendix # 2. Pipettes used for sample dilution can also be recorded on the dilution sheet.
- QC samples prepared in Serum Matrix and tQC should be loaded n=2 (one set before and one set after samples) or more if needed for kit qualification.
- Samples should be transported from Sample Management on dry ice. Record in-process sample storage in Appendix #2.
- Study samples should be analyzed in duplicate at the same time.
- The study samples will be diluted at least 2-fold using the Serum Matrix (minimal required dilution (MRD)).
- Dilution of samples should be performed on wet ice, refer to Appendix #5 for instructions.

## Appendix 11

### Appendix 3

|                                |                                    |                            |                    |
|--------------------------------|------------------------------------|----------------------------|--------------------|
| AP Number:<br>AP.BMK.mkpCYT.12 | Effective Date:<br>Signature of AP | Supersedes:<br>19-Mar-2019 | Page 8 of 18 pages |
|--------------------------------|------------------------------------|----------------------------|--------------------|

- viii. All solutions added for incubation at ambient RT should be brought to ambient RT prior to use.
- ix. For all incubation steps, the plate should be covered with aluminium foil sealer in order to be protected from light.
- x. Refer to Appendix 2a (plate washer) or 2b (manual wash) for the multiplex assay procedure. The automatic plate washer should be the first option for washing steps, however, if there is no plate washer in the laboratory, manual wash, using handheld magnetic washer, can be done (refer to appendix #5).
- xi. If the reading of the plate needs to be stopped due to a reading malfunction, repeat the last wash step, add 150 µL of Sheath fluid in all wells of the plate. Incubate the plate protected from light on a plate shaker set at 600 rpm at ambient RT for at least 5 minutes and re-read the entire plate. **This should be documented in the raw data.**

#### 9.0 Plate Washer for magnetic beads verification and settings (Appendix 2a)

- Daily Maintenance should be performed as per SOP CAE-213.
- Wash program should be ran as specified in the SOP using program «LUM MAG»

| Plate mode                                                                                                                          |                                                                                                                                     |                                                                                                                                     |
|-------------------------------------------------------------------------------------------------------------------------------------|-------------------------------------------------------------------------------------------------------------------------------------|-------------------------------------------------------------------------------------------------------------------------------------|
| BPlex-Mag                                                                                                                           |                                                                                                                                     |                                                                                                                                     |
| Cycle 1 (8 parameters):                                                                                                             |                                                                                                                                     |                                                                                                                                     |
| <u>C1 P1 Soak</u><br>Time 1 min 0s<br>Shake OFF                                                                                     | <u>C1 P4 Soak</u><br>Time 1 min 0s<br>Shake OFF                                                                                     | <u>C1 P7 Soak</u><br>Time 1 min 0s<br>Shake OFF                                                                                     |
| <u>C1 P2 Aspirate</u><br>Crosswise (cross) aspirate (Asp) YES<br>Position (pos): bottom<br>Time: 4s<br>H-Speed 10mm/s<br>Asp Rate 2 | <u>C1 P5 Aspirate</u><br>Crosswise (cross) aspirate (Asp) YES<br>Position (pos): bottom<br>Time: 4s<br>H-Speed 10mm/s<br>Asp Rate 2 | <u>C1 P8 Aspirate</u><br>Crosswise (cross) aspirate (Asp) YES<br>Position (pos): bottom<br>Time: 4s<br>H-Speed 10mm/s<br>Asp Rate 2 |
| <u>C1 P3 Dispense</u><br>Z-pos Overflow<br>Volume 200 µL<br>Channel 1<br>Flow (FL) rate 200 µL/s                                    | <u>C1 P6 Dispense</u><br>Z-pos Overflow<br>Volume 200 µL<br>Channel 1<br>Flow (FL) rate 200 µL/s                                    |                                                                                                                                     |

#### 10.0 Plate Washer for magnetic beads verification and settings (Appendix 2b)

- Procedure to empty the wells with handheld magnetic washer is detailed in the Appendix 2b.

#### 11.0 Preparation of the Bio-Plex Suspension Array (Luminex) Protocol

*Note: The different items (STD's, QC's or Samples) loaded on the Bio-Plex plate layout should always be set up in replicates of 2. In the case where only one well was used on the assay plate or if a sample is not loaded, Bio-Plex Manager should still be configured with 2 replicates. An appropriate note in the raw data will indicate to the Scientist that only one well was loaded or if the sample was not loaded and the required replicates will be deactivated accordingly after importing the data into Watson.*

##### 11.1.1 The luminex should be calibrated as follows:

- Perform a warm up of the Bio-Plex Suspension assay System.

## Appendix 11

### Appendix 3

|                                |                                    |                            |                    |
|--------------------------------|------------------------------------|----------------------------|--------------------|
| AP Number:<br>AP.BMK.mkpCYT.12 | Effective Date:<br>Signature of AP | Supersedes:<br>19-Mar-2019 | Page 9 of 18 pages |
|--------------------------------|------------------------------------|----------------------------|--------------------|

- **If the Bio-Plex Suspension assay System is no longer warm when the analyst is ready to perform the start-up, this step should be repeated (note that Bio-Plex manager will prompt the user if the instrument needs a warm up before start up).**
- Perform a start-up of the Bio-Plex Suspension assay System.
- Perform a calibration of the Bio-Plex Suspension assay System as described below.
- 11.1.2 Unclog before reading plate
  - This procedure is required before reading a Luminex plate. It is not needed for the first plate to be read **on a given day** if the calibration passes successfully.
  - If the unclog fails, the needle should be sonicated, and the unclog repeated.
  - If the repeat is successful, the plate can be read and the calibration does not need to be repeated
- 11.1.3 The BioPlex calibration kit contains two bottles, Bio-Plex cal 1 (red) and Bio-Plex cal 2 (green).
  - In the luminex calibration window, enter information related to Bio-Plex cal 1 (i.e. DD target, CL1 target, CL2 target) written on the back of the red bottle.
  - In the luminex calibration window, enter information related to Bio-Plex cal 2 written on the back of the green bottle. For the cytokines luminex enter **only the Low RP1 target value**. The High RP1 target value should not be used.
- 11.1.4 Parameters of the Protocol should be set as follows:
  - In section #2."Select Analytes", select the panel "Millipore Non-Human Primate Cytokine Bead Panel". If the panel "Millipore Non-Human Primate Cytokine Bead Panel" is not in the selection of the drop-down menu, create it and add the cytokines and their defined region as described in the kit insert. The cytokine ID should be entered as stated in bold below.
  - Transfer the following cytokine in the "Selected" column: **(Please note that the cytokine ID should be typed in Bioplex exactly as below):**

**Refer to Appendix #5 for the list of cytokines to be analyzed.**

|                             |                               |
|-----------------------------|-------------------------------|
| <b>mkpIL1B (Region 46)</b>  | <b>mkpIL6 (Region 57)</b>     |
| <b>mkpIL1RA (Region 42)</b> | <b>mkpIFNG (Region 20)</b>    |
| <b>mkpIL10 (Region 35)</b>  | <b>mkpTNFA (Region 72)</b>    |
| <b>mkpIL18 (Region 78)</b>  | <b>mkpIL12-23 (Region 74)</b> |
| <b>mkpIL15 (Region 37)</b>  | <b>mkpGCSF (Region 18)</b>    |
| <b>mkpMIP1B (Region 73)</b> | <b>mkpMCP1 (Region 67)</b>    |
| <b>mkpGMCSF (Region 14)</b> | <b>mkpIL2 (Region 33)</b>     |
| <b>mkpIL4 (Region 53)</b>   | <b>mkpIL5 (Region 55)</b>     |
| <b>mkpIL8 (Region 63)</b>   | <b>mkpIL13 (Region 44)</b>    |
| <b>mkpIL17A (Region 39)</b> |                               |

- In section #3."Format Plate", format the plate sequence as per Watson's plate sequence.
- In section #7."Run Protocol", **set the beads at 50 per region**. (At least 30 beads should be acquired to consider the reading reliable)
- In the "Advanced Settings", set sample size at 100 µL.
- The doublet discriminator Gate range setting (DD gates) is set between **5 000 and 25 000**.
- The reporter PMT is set as default.

**Appendix 11**  
**Appendix 3**

|                                |                                    |                            |                     |
|--------------------------------|------------------------------------|----------------------------|---------------------|
| AP Number:<br>AP.BMK.mkpCYT.12 | Effective Date:<br>Signature of AP | Supersedes:<br>19-Mar-2019 | Page 10 of 18 pages |
|--------------------------------|------------------------------------|----------------------------|---------------------|

**12.0 Exporting data to Watson LIMS***Notes:*

- i. The assay should first be setup with these settings: Assay Type should be Multi Analyte Plate and the Instrument Type and Instrument Interface should be Bio-Rad Bio-Plex.
- ii. For Watson analysis, Analyte info in Master assay should be set as follow:

| Analyte Identification (also refer to Section 10.1.4) |                         |                |                          |                |
|-------------------------------------------------------|-------------------------|----------------|--------------------------|----------------|
| IL-1 $\beta$ = mkpIL1B                                | IL-1RA= mkpIL1RA        | IL-2=mkpIL2    | IL-4= mkpIL4             | IL-10= mkpIL10 |
| IL-12/23(p40)=<br>mkpIL12-23                          | TNF- $\alpha$ = mkpTNFA | IL-8= mkpIL8   | IFN- $\gamma$ = mkpIFNG  | IL-15= mkpIL15 |
| G-CSF= mkpGCSF                                        | GM-CSF=<br>mkpGMCSF     | IL-5= mkpIL5   | IL-13= mkpIL13           | IL-6= mkpIL6   |
| IL-17A= mkpIL17A                                      | IL-18= mkpIL18          | MCP-1= mkpMCP1 | MIP-1 $\beta$ = mkpMIP1B |                |

| Details (Watson Master Assay settings) |                  |
|----------------------------------------|------------------|
| Reduction type                         | 5 PL (MARQUARDT) |
| Analyte Info                           |                  |
| Concentration units                    | pg/mL            |
| Weighting Factor                       | 1/Y**2           |
| Decimal Places                         | 6                |
| Regression Type                        | 5 PL (MARQUARDT) |

**12.1 Export data to Watson LIMS as follows:**

- First make sure the required Bio-Plex data file is opened; the original unformatted file must be used for exporting.
- Click on the "Table Options" menu, and select "Show Replicates" (or click the equivalent taskbar button).
- Then, click on "File", "Export Table" (or click the equivalent taskbar button).
- From the "Table Export Options" window, select the following options: Export Format: "Table per Analyte", Export Source: "All Analytes", Export Destination: "Text File (Tab Delimited)."
- Do NOT tick the Exclude checkboxes. Click "OK", type a filename that represents the study/reference number and run (e.g.: STUDYNO\_mkpcYT - xx, where "xx" denotes the assay number) and refer to SOP CAE-147 for exporting.

**Appendix 11**  
**Appendix 3**

|                                |                                    |                            |                     |
|--------------------------------|------------------------------------|----------------------------|---------------------|
| AP Number:<br>AP.BMK.mkpCYT.12 | Effective Date:<br>Signature of AP | Supersedes:<br>19-Mar-2019 | Page 11 of 18 pages |
|--------------------------------|------------------------------------|----------------------------|---------------------|

**13.0 Preparation of the Bio-Plex Manager printout***Note:*

- i. *Due to a known issue with the Bio-Plex software, some of the pages on the Luminex printouts have the following information omitted at the bottom of the page: -1- low bead #. The above omission has no impact upon the integrity of the study.*
  - ii. *At least the first page of each analyte printout should be signed and dated. The pagination of each analyte printout is indicated at the bottom right of each page as "x/y", where "x" denotes the current page number and "y" denotes the total number of pages.*
  - iii. *When the printouts are reprinted, the "signed/by and Document ID" does not appear due to software limitations. Refer to original printouts when this situation occurs.*
- 13.1.1 When preparing the Bio-Plex Manager Protocol, the sample dilution should always be set at 1 regardless of the actual dilution factors. The final concentration will be adjusted in Watson using the appropriate dilution factor.
- 13.1.2 Once the assay plate has been read, the columns of the Bio-Plex Manager printout should be adjusted as follows prior to printing:

| Type | Well | FI | FI - Bkgd | Bead<br>Count | Sampling<br>Error |
|------|------|----|-----------|---------------|-------------------|
|------|------|----|-----------|---------------|-------------------|

**13.1.3 Calculation**

The five parameters logistic (5PL Marquardt) model is used to fit the sigmoid calibration curve. A logarithmic sigmoid calibration curve is obtained by plotting the Fluorescence Intensity (FI) against the concentration. Concentrations of analytes in the test samples are determined by computer interpolation from the plot of the calibration curve.

**Appendix 11**  
**Appendix 3**

|                                |                                    |                            |                     |
|--------------------------------|------------------------------------|----------------------------|---------------------|
| AP Number:<br>AP.BMK.mkpCYT.12 | Effective Date:<br>Signature of AP | Supersedes:<br>19-Mar-2019 | Page 12 of 18 pages |
|--------------------------------|------------------------------------|----------------------------|---------------------|

**14.0 Assay Acceptance Criteria****14.1 Standard Curve Acceptance Criteria****14.1.1** For all cytokines: Mean (FI) Blank < Mean (FI) LLOQ

*Note: The Bio-Plex printout should be used in order to evaluate the FI (FI= Fluorescence Intensity)*

**14.1.2** The calibration curve should contain at least six non-zero standards, after removal of rejected standards (as described below). If the LLOQ and/or the ULOQ are removed, then the next lowest and/or next highest standard becomes the LLOQ and ULOQ, respectively. Any samples reported as > the new ULOQ or as < the new LLOQ should be repeated.

- Percent nominal calculated using the mean concentrations should be within 75% - 125% of their theoretical value for all standard except for LLOQ and ULOQ which should be within 70% - 130% (accessory standard are not included).
- A standard that meets the acceptance criteria but tends to bias the standard curve causing the curve to fail, thus having a negative impact on the overall standard curve or the other working standards, may be partially or fully masked.

If the criteria mentioned above are not met, a standard should be fully or partially removed (i.e. the minimal reprocessing):

- 8- and 9-points standard curve: Up to a maximum of i) two full points, or ii) one full point and two partial points, or iii) three partial points may be removed from a calibration curve. Two adjacent standards cannot be fully deleted in a curve.
- 7-point standard curve: Up to a maximum of i) one full point and one partial point, or ii) two partial points may be removed from a calibration curve.
- 6-point-standard curve: Up to a maximum of i) two partial points may be removed from a calibration curve.
- If the accessory standards have a negative impact on the overall back-calculation of the individual standards they can be partially or fully masked.

**14.2 Acceptance Criteria for QC samples prepared in Serum matrix and tQC**

Percent theoretical is calculated using the mean concentration and should be within 75% - 125% for quality control (QC and tQC) samples. The precision (%CV) between QC sample duplicate concentrations should be ≤ 20%, except if the QC value was reported in singlicate (refer to section 13.3).

**14.3 Run Acceptance Criteria**

A run is accepted if the following three criteria are met:

- 14.3.1** The curve must meet the acceptance criteria (mentioned in section 14.1).
- 14.3.2** At least 67% of the quality control (QC) samples must meet the acceptance criteria (mentioned in section 14.2), with 50% accepted quality control (QC) samples at each level.
- 14.3.3** With the addition of a "Sampling Error" column on the Luminex printouts certain results may be called into question when errors occur. See the table below for a description of the errors:

## Appendix 11

### Appendix 3

|                                |                                    |                            |                     |
|--------------------------------|------------------------------------|----------------------------|---------------------|
| AP Number:<br>AP.BMK.mkpCYT.12 | Effective Date:<br>Signature of AP | Supersedes:<br>19-Mar-2019 | Page 13 of 18 pages |
|--------------------------------|------------------------------------|----------------------------|---------------------|

| Error Code: | Indicates:                                                  |
|-------------|-------------------------------------------------------------|
| 1           | Low bead number detected in the well                        |
| 2           | Aggregated beads detected in the well                       |
| 3           | Bead classification efficiency problem detected in the well |
| 4           | Region selection problem detected in the well               |
| 5           | Platform temperature problem detected                       |

For this study, errors that can potentially compromise the quality of the data appear in this column (error codes 1, 3 and 4); please refer to the following list:

- 1) if both replicates for a standard, QC or test sample have sampling errors the standard, QC or test sample is to be rejected.
- 2) if one replicate of a blank, a standard or quality control has a sampling error the error can be masked and the value reported as a singlicate.

The above list requires that a minimum of 30 beads be read for the result to be considered reliable. Please note that for a low bead error, the error might not be applicable to all analytes. Only the affected analytes will be addressed. Error code 5 (platform temperature problem detected) appears if a variation of  $\pm 2^{\circ}\text{C}$  occurs during reading. If this happens, impact on the data should be evaluated and documented. If aggregation of the beads occurs causing the error code 2 to appear but does not impede acquisition of a minimum of 30 beads or does not cause bead classification or region selection problems, it will not be considered as causing reliability issues with the obtained results.

#### 14.4 Acceptance criteria for Study samples

- 14.4.1 The mean duplicate concentration will be reported.
- 14.4.2 The %CV between the duplicate concentrations should be  $\leq 20\%$ . A sample must be repeated if the %CV between the duplicate concentrations is  $>20\%$ .
- 14.4.3 if one replicate for a sample has a sampling error, the sample will be repeated or if insufficient volume remains only the singlicate value will be reported and flagged as such in the report.
- 14.4.4 Watson cannot calculate the % CV between singlicates if one singlicate is within the curve range, and the other singlicate is  $<\text{LLOQ}$  when the sample is analyzed at the lowest validated dilution or  $>\text{ULOQ}$  when analyzed at the highest validated dilution. Therefore, LLOQ and ULOQ thresholds have been defined, that represent 20.4% CV with the LLOQ and ULOQ, respectively. If one singlicate is not within the curve range and the other singlicate is  $> \text{LLOQ}$  threshold or  $<\text{ULOQ}$  threshold, the sample should be repeated. If the quantifiable is  $\leq \text{LLOQ}$  threshold or  $\geq \text{ULOQ}$  threshold, the quantifiable singlicate is reported. ***The specific LLOQ and ULOQ thresholds will be defined in Appendix # 5.***
- 14.4.5 Any study sample with concentration below LLOQ will be reported as  $< \text{LLOQ}$  (including dilution factor). The value of the LLOQ should be recorded in the footnote of the report table.
- 14.4.6 "Y/2" (where "Y" is the LLOQ concentration multiplied by the dilution factor) will be used for the calculation of the mean and standard deviation (SD) for values for which the measured concentration was  $<\text{LLOQ}$ , and will be mentioned as a footnote as well.

**Appendix 11**  
**Appendix 3**

|                                |                                    |                            |                     |
|--------------------------------|------------------------------------|----------------------------|---------------------|
| AP Number:<br>AP.BMK.mkpCYT.12 | Effective Date:<br>Signature of AP | Supersedes:<br>19-Mar-2019 | Page 14 of 18 pages |
|--------------------------------|------------------------------------|----------------------------|---------------------|

14.4.7 Any sample with a concentration >ULOQ should be further diluted with Serum Matrix and re-analyzed (as applicable). The final reported value should be the observed concentration multiplied by the dilution factor.

14.4.8 In the event that a sample may not be reanalyzed at a higher dilution factor due to validation or volume limitation, "X" (where X is the assay ULOQ concentration multiplied by the dilution factor at which the sample was analyzed) will be reported and flagged appropriately. "X" will be used for the calculation of the mean and standard deviation (SD).

14.4.9 The acceptance criteria defined for a multiplex assay are to be verified for each individual cytokine and sample. As such, samples may need to be reanalyzed for one or more cytokines but not necessarily for the entire panel. However, due to the multiplexing nature of the assay, it is not always feasible to repeat analysis for a specific cytokine(s) without generating data for the other cytokines in the panel. Therefore, when repeating samples for specific cytokine(s), one analytical run will be created in Watson and results for all analytes will be generated for every samples analyzed in the assay. However, samples where re-analysis for a specific cytokine(s) is not required will be deactivated (or masked) in Watson. The results will be kept in the raw data but not included in the report. Appendix #7, listing the samples and cytokines to be re-analyzed will be issued and signed by a Scientist or designee, prior to the analysis being performed. It should be noted that the Appendix #7 should be used only when sample(s) do not need to be analyzed for all cytokines stated in Appendix #5.

14.5 Reporting:

14.5.1 Concentrations in pg/mL, mean and SD should be rounded to two decimal places and percentage to one decimal place. Note that due to a software limitation, all means and SDs will be reported to 1 more decimal place and percentages will be reported with no decimal places when generated by the SRS software.

14.5.2 The upper limit of the normal range of concentrations will be defined as:

The overall baseline mean (predose/pre-treatment values for all animals\* in all groups)\*\* + 2 standard deviations.

Fold change will be reported as:

- The ratio of the measured Cytokine concentration/ upper limit of the normal range of concentrations.

- The fold change should be calculated for each sample.

Incidence of Cytokine elevations will be reported as:

The number of individual animals\* per group with a fold change  $\geq 1.1$ -fold.

Based on the nature of the study or specific sponsor requirement the upper limit of the normal range of concentrations, fold change and/or incidence might be calculated differently, and should be documented in the study specific study plans.

\*Calculations will be done separately for females and males.

\*\*If predose values are not available, values from all animals of the non-treated group(s) will be used to generate the overall baseline mean.

**Appendix 11**  
**Appendix 3**

|                                |                                    |                            |                     |
|--------------------------------|------------------------------------|----------------------------|---------------------|
| AP Number:<br>AP.BMK.mkpCYT.12 | Effective Date:<br>Signature of AP | Supersedes:<br>19-Mar-2019 | Page 15 of 18 pages |
|--------------------------------|------------------------------------|----------------------------|---------------------|

**15.0 Revision History**

| Version | Date        | Reason For Revision                                                                                                                                                                                                                                                                                                                                                                                                                                                                                                                                                                                                                                                                                                                                                                                                                                                                           |
|---------|-------------|-----------------------------------------------------------------------------------------------------------------------------------------------------------------------------------------------------------------------------------------------------------------------------------------------------------------------------------------------------------------------------------------------------------------------------------------------------------------------------------------------------------------------------------------------------------------------------------------------------------------------------------------------------------------------------------------------------------------------------------------------------------------------------------------------------------------------------------------------------------------------------------------------|
| 1       | 23 Mar 2016 | New AP                                                                                                                                                                                                                                                                                                                                                                                                                                                                                                                                                                                                                                                                                                                                                                                                                                                                                        |
| 2       | 15 Apr 2016 | <ul style="list-style-type: none"> <li>- Clarified the amount of reagents to order in section 5.2.</li> <li>- Updated the volumes to prepare the Wash buffer.</li> <li>- Added IL-5 and removed IL-12 in the Validation Summary Table for Freeze-thaw matrix stability at -80°C.</li> <li>- The "divided by 2" was removed from the last line of section 13.4.3.</li> </ul>                                                                                                                                                                                                                                                                                                                                                                                                                                                                                                                   |
| 3       | 28 Sep 2016 | <ul style="list-style-type: none"> <li>- Charles River logo was updated.</li> <li>- LTS for IL-1RA, IFN-γ, TNF-α, IL-6, FT for IL-2, and all stabilities for IL-18 and MCP-1 were updated.</li> <li>- Parallelism and linearity section for IL-1b, IFN-γ, IL-6, IL-8, IL-10 and MCP-1 was updated</li> <li>- Wash buffer name code was changed.</li> <li>- Appendices 2 and 4 were updated to reflect changes on wash buffer name code.</li> <li>- Appendix 5 was updated to add a comment for GM-CSF.</li> <li>- Appendix 2 was updated to update the step of the addition of the assay buffer.</li> <li>- Section 13.5.2 was updated to reflect appropriate interpretation (upper limit of normal range instead of normal range) (if predose or pretreatment not available the mean of the control group will be used)</li> </ul>                                                           |
| 4       | 17 Nov 2016 | <ul style="list-style-type: none"> <li>- Section 5.2: Clarification on the amount of reagent to order</li> <li>- Section 8: Correction of the reference to the appendix for the in-process sample storage.</li> <li>- Section 13.5.2: Fold change will be calculated for each sample.</li> </ul>                                                                                                                                                                                                                                                                                                                                                                                                                                                                                                                                                                                              |
| 5       | 07 Sep 2017 | <p><b><u>Validation Box, Freeze-thaw matrix stability at -80°C:</u></b></p> <ul style="list-style-type: none"> <li>- IL-13 was added to the list of cytokines that can be submitted to 4 freeze-thaw cycles in a freezer set to maintain -80°C.</li> <li>- GM-CF was corrected to GM-CSF.</li> </ul> <p><b><u>Throughout the document:</u></b> CR-MTL as updated to CR MTL, and minor typos were corrected.</p> <ul style="list-style-type: none"> <li>- <b><u>Appendix 2, In Process Sample Storage:</u></b> N/Ap was added to the first box, to account for kit qualifications, endochecks and spikechecks, where no samples from Watson are used.</li> <li>- <b><u>Appendix 2, Scientific Data Review :</u></b> N/Ap was added for "samples to repeat" for all cytokines, to account for kit qualifications, endochecks and spikechecks, where no samples from Watson are used.</li> </ul> |

**Appendix 11****Appendix 3**

|                                |                                    |                            |                     |
|--------------------------------|------------------------------------|----------------------------|---------------------|
| AP Number:<br>AP.BMK.mkpCYT.12 | Effective Date:<br>Signature of AP | Supersedes:<br>19-Mar-2019 | Page 16 of 18 pages |
|--------------------------------|------------------------------------|----------------------------|---------------------|

|   |             |                                                                                                                                                                                                                                                                                                                                                                                                                                                                                                                                                                                                                                                                                                                                                                                                                                                                                                                                                                                                                                                |
|---|-------------|------------------------------------------------------------------------------------------------------------------------------------------------------------------------------------------------------------------------------------------------------------------------------------------------------------------------------------------------------------------------------------------------------------------------------------------------------------------------------------------------------------------------------------------------------------------------------------------------------------------------------------------------------------------------------------------------------------------------------------------------------------------------------------------------------------------------------------------------------------------------------------------------------------------------------------------------------------------------------------------------------------------------------------------------|
|   |             | <ul style="list-style-type: none"> <li>- <b>Appendix 5:</b> Added a prompt to enter the assay in which the kit lot and the standard were qualified.</li> </ul>                                                                                                                                                                                                                                                                                                                                                                                                                                                                                                                                                                                                                                                                                                                                                                                                                                                                                 |
| 6 | 26 Jan 2018 | <ul style="list-style-type: none"> <li>- Section 5.2 updated the amount of extra Non-Human Primate Cytokine Standard and serum matrix to be ordered per kit, clarified the critical reagents and added reagent volumes and catalogue numbers by bead</li> <li>- Section 6.0: Added the appropriate appendix for the data recording</li> <li>- Section 7.0: IL-1<math>\beta</math> was removed from the list of cytokines with a 90-day LTS since the LTS for IL-1 <math>\beta</math> has been extended to 264 days in a freezer set to maintain -80°C.</li> <li>- Section 7.0, 8.0 and Appendix #5: Sample dilution updated from RT to wet ice.</li> <li>- Section 10.1.2: corrected typo from f to if.</li> <li>- Appendix 2: Updated sample handling from RT to wet ice, added brackets where missing, updated wash Buffer code from mkpCytWB to mkpCYTWB.</li> <li>- Appendix 4: Separated the Storage location and expiry date prompts, update wash buffer code to mkpCYTWB</li> <li>- Minor wording updates and reorganization</li> </ul> |
| 7 | 03 Apr 2018 | <ul style="list-style-type: none"> <li>- To clarify the example in section 6.1.2.</li> <li>- To clarify the reconstitution of the Serum Matrix (Section 6.1.3) and to update the code of the solution.</li> <li>- To remove the linearity of dilution for IL-1b because parallelism was performed under the validation and was obtained up to MRD (2-fold).</li> <li>- To update the Data review section in Appendix 02. IL-17A should be mentioned instead of IL-17.</li> <li>- To update appendices 01 and 02 for the code of the serum matrix.</li> </ul>                                                                                                                                                                                                                                                                                                                                                                                                                                                                                   |
| 8 | 24 Jul 2018 | <ul style="list-style-type: none"> <li>- Section 5.3: statement that matrices may have been stored at a different temperature was removed since both -20°C and -80°C are stated as possible storage temperatures.</li> <li>- Section 9. Wording for maintenance of the plate washer was removed and replaced by a reference to the appropriate SOP.</li> <li>- Sections 10.1.4 and 11.0 were updated with the SEND terminology.</li> <li>- Section 13: the appropriate action in the events of beads errors in samples wells was moved from the run acceptance criteria to the samples acceptance criteria.</li> <li>- Section 13.4.3 describing: If the mean concentration of a sample is lower than the lower limit of quantitation (LLOQ) and the %CV of the duplicate results is &gt;20% [...] was removed, since Watson cannot calculate the %CV when one of the singlicates is &lt;LLOQ.</li> <li>- Section 13.4 was updated to include the description of the ULOQ threshold.</li> </ul>                                                |

**Appendix 11**  
**Appendix 3**

|                                |                                    |                            |                     |
|--------------------------------|------------------------------------|----------------------------|---------------------|
| AP Number:<br>AP.BMK.mkpCYT.12 | Effective Date:<br>Signature of AP | Supersedes:<br>19-Mar-2019 | Page 17 of 18 pages |
|--------------------------------|------------------------------------|----------------------------|---------------------|

|    |             |                                                                                                                                                                                                                                                                                                                                                                                                                                                                                                                                                                                                                                                                                                                                                                                                                                                                                                                                                                                                                                                                                                                                                                                                                                                                                                                                |
|----|-------------|--------------------------------------------------------------------------------------------------------------------------------------------------------------------------------------------------------------------------------------------------------------------------------------------------------------------------------------------------------------------------------------------------------------------------------------------------------------------------------------------------------------------------------------------------------------------------------------------------------------------------------------------------------------------------------------------------------------------------------------------------------------------------------------------------------------------------------------------------------------------------------------------------------------------------------------------------------------------------------------------------------------------------------------------------------------------------------------------------------------------------------------------------------------------------------------------------------------------------------------------------------------------------------------------------------------------------------|
|    |             | <ul style="list-style-type: none"> <li>- Appendix #2: Sample dilution step of the assay instruction: N/Ap was added as a possibility to account for the absence of samples in a spikecheck.</li> <li>- Appendix #5 was updated to include a space to enter the values of the ULOQ thresholds and to remove the check box for analysis on wet ice.</li> </ul>                                                                                                                                                                                                                                                                                                                                                                                                                                                                                                                                                                                                                                                                                                                                                                                                                                                                                                                                                                   |
| 9  | 06 Dec 2018 | <ul style="list-style-type: none"> <li>- Addition of the Appendix 7, to define which analyte will be measured for sample repeats.</li> <li>- Section 1.0: Correction of the name of MIP-1<math>\beta</math></li> <li>- Section 4.0: Add reference of the Appendix #7.</li> <li>- Section 5.2: Increase to 3 the number of serum matrix vials to order by kit, two vials were not sufficient.</li> <li>- Section 5.3: Update supplier name for BioIVT.</li> <li>- Section 8.0: rewording for clarification</li> <li>- Section 10.0: clarification of the note if sample was not loaded</li> <li>- Section 13.4.8: Add paragraph for explanation of which cytokines results will be reported for sample repeats.</li> <li>- Section 13.5.2: Definition of incidence of cytokine elevation was updated. The number of individual animals per group with a concentration upper to the limit of normal range was updated for a concentration <math>\geq 1.1</math>-fold change.</li> <li>- Appendix #3: transfer the sentence from the appendix #2, for the preparation / homogenization of the antibody-beads.</li> <li>- Appendix #7: Add the correct symbol for cytokines names, change the entree format for records of date and time.</li> <li>- Minor typographical errors corrected without changes in procedure.</li> </ul> |
| 10 | 11 Dec 2018 | <ul style="list-style-type: none"> <li>- Addition of special characters, which were missing on the title of the previous version.</li> </ul>                                                                                                                                                                                                                                                                                                                                                                                                                                                                                                                                                                                                                                                                                                                                                                                                                                                                                                                                                                                                                                                                                                                                                                                   |
| 11 | 19-Mar-2019 | <ul style="list-style-type: none"> <li>- Page 1 header: logo updated.</li> <li>- Section 4.0: Example of Document was removed from next to Appendix #2, since this appendix is not subject to change.</li> <li>- Section 5.1.1 Volumetric pipettes was changed to serologic pipettes.</li> <li>- Section 13.1.2: clarification was added.</li> <li>- Appendix #3: A prompt was added to record the sonicating and the vortexing of the beads prior to preparation of the beads mix. Supplier column removed since all reagents are from the kit.</li> <li>- Appendix #4: Supplier column removed.</li> <li>- Appendix #5: Correction of the storage temperature of the tQC (80°C was corrected to -80°C)</li> <li>- Minor typos and inconsistencies were corrected throughout the document, without changes in the procedure.</li> </ul>                                                                                                                                                                                                                                                                                                                                                                                                                                                                                       |

**Appendix 11****Appendix 3**

|                                |                                    |                            |                     |
|--------------------------------|------------------------------------|----------------------------|---------------------|
| AP Number:<br>AP.BMK.mkpCYT.12 | Effective Date:<br>Signature of AP | Supersedes:<br>19-Mar-2019 | Page 18 of 18 pages |
|--------------------------------|------------------------------------|----------------------------|---------------------|

|    |                    |                                                                                                                                                                                                                                                                                                                                                                                                                                                                                                                                                                                                                                                                                                                                                                                                                                                                                                                                                                                                                                                                                                                                                        |
|----|--------------------|--------------------------------------------------------------------------------------------------------------------------------------------------------------------------------------------------------------------------------------------------------------------------------------------------------------------------------------------------------------------------------------------------------------------------------------------------------------------------------------------------------------------------------------------------------------------------------------------------------------------------------------------------------------------------------------------------------------------------------------------------------------------------------------------------------------------------------------------------------------------------------------------------------------------------------------------------------------------------------------------------------------------------------------------------------------------------------------------------------------------------------------------------------|
| 12 | Signature of<br>AP | <ul style="list-style-type: none"><li>- Pages numbers were added to the header instead of footers in order to harmonize with other APs.</li><li>- Updated the section 5.1.1 to add the handheld magnetic washer and orbital plate shaker (orbit 4 mm).</li><li>- Updated the section 5.3 for the supplier to use when ordering matrix.</li><li>- Clarify the section 6.2 for the end time for the reconstitution of the standard stock and the STDs/QCs preparation.</li><li>- Manual wash using handheld magnetic washer added. Therefore, section 8 point i and section 9 were updated and section10 was added. These sections were updated/added to allow the use of manual wash.</li><li>- Updated Appendix #1, formula now refer to calculated concentration instead of target concentration.</li><li>- Updated Appendix #2a title to include plate washer.</li><li>- A new Appendix #2b was created for the assay using the manual wash.</li><li>- Updated Appendix #5 for the use of plate washer or manual wash.</li><li>- Minor typos and inconsistencies were corrected throughout the document, without changes in the procedure.</li></ul> |
|----|--------------------|--------------------------------------------------------------------------------------------------------------------------------------------------------------------------------------------------------------------------------------------------------------------------------------------------------------------------------------------------------------------------------------------------------------------------------------------------------------------------------------------------------------------------------------------------------------------------------------------------------------------------------------------------------------------------------------------------------------------------------------------------------------------------------------------------------------------------------------------------------------------------------------------------------------------------------------------------------------------------------------------------------------------------------------------------------------------------------------------------------------------------------------------------------|

Sponsor Reference No. UTSW-Gray-SPG50-004

Test Facility Study No. 5550014

## Appendix 11

## Appendix 3

Cytokine Multiplex Spiking Sheet

Study/Reference no/Assay ID: \_\_\_\_\_  
 Reference material: Non-Human primate Cytokine Standard  
 Manufacturer: Milipore  
 Catalogue No.: MXPR8040

| Table 1. Serum Matrix     |                | Lot number              | Inventory #:                          |                 |                                                               |         |                                |                                         |                 |                   |
|---------------------------|----------------|-------------------------|---------------------------------------|-----------------|---------------------------------------------------------------|---------|--------------------------------|-----------------------------------------|-----------------|-------------------|
| Sample Identification     | Batch assigned | # of reconstituted vial | Volume of UPW added to each vial (mL) |                 | Time left on bench after reconstitution (at least 10 minutes) |         | Transfer to polypropylene tube | Volume used from each vial to pool (mL) |                 | Total Volume (mL) |
| Serum Matrix cat # MXPRSM | mkpSM-         | 4                       | 1.000                                 | ( ) ( ) ( ) ( ) | Start:                                                        | Finish: | ( )                            | 0.950                                   | ( ) ( ) ( ) ( ) | 3.800             |

Reconstituted serum Matrix Stored ☐ Location (if applicable) \_\_\_\_\_ Discarded after use ☐

|                                             |                         |                                                                                                      |            |               |                                                              |         |                                |                                         |         |                   |
|---------------------------------------------|-------------------------|------------------------------------------------------------------------------------------------------|------------|---------------|--------------------------------------------------------------|---------|--------------------------------|-----------------------------------------|---------|-------------------|
| Table 2.                                    |                         | Standard stock                                                                                       | Lot number | Inventory # : |                                                              |         |                                |                                         |         |                   |
| Sample Identification                       | # of reconstituted vial | Volume of UPW added to each vial (mL). Vial inverted several times to mix, and vortex for 10 seconds |            |               | Time left on bench after reconstitution (at least 5 minutes) |         | Transfer to polypropylene tube | Volume used from each vial to pool (mL) |         | Total Volume (mL) |
| Non-Human primate Standard Cytokine (Stock) | 2                       | 0.250                                                                                                | ( ) ( )    |               | Start:                                                       | Finish: | ( )                            | 0.225                                   | ( ) ( ) | 0.450             |

Comments: Standards and QCs should be used for the preparation of STDs and QCs within one hour of reconstitution finish time.

| Table 3. Preparation of Standards and QCs |                                                                                                                            |              |          |                      |                                                                                                                            |              |          |                   |             |               |              |               |                                                                                                                            |              |          |                                         |  |
|-------------------------------------------|----------------------------------------------------------------------------------------------------------------------------|--------------|----------|----------------------|----------------------------------------------------------------------------------------------------------------------------|--------------|----------|-------------------|-------------|---------------|--------------|---------------|----------------------------------------------------------------------------------------------------------------------------|--------------|----------|-----------------------------------------|--|
| Sample Identification                     | Target Concentration (pg/mL)                                                                                               |              |          | Stock Identification | Stock Concentration (pg/mL)                                                                                                |              |          | Total Volume (μL) | Stock       |               | Serum Matrix |               | Calculated Concentration (pg/mL)                                                                                           |              |          | End time of preparation of STDs and QCs |  |
|                                           | IL-1β, IL-1RA, IL-6, IL-12/23 (p40), IL-15, TNF-α, IFN-γ, G-CSF, MCP-1, MIP-1β, GM-CSF, IL-2, IL-5, IL-8, IL-13 and IL-17A | IL-10, IL-18 | IL-4     |                      | IL-1β, IL-1RA, IL-6, IL-12/23 (p40), IL-15, TNF-α, IFN-γ, G-CSF, MCP-1, MIP-1β, GM-CSF, IL-2, IL-5, IL-8, IL-13 and IL-17A | IL-10, IL-18 | IL-4     |                   | Volume (μL) | Performed (✓) | Volume (μL)  | Performed (✓) | IL-1β, IL-1RA, IL-6, IL-12/23 (p40), IL-15, TNF-α, IFN-γ, G-CSF, MCP-1, MIP-1β, GM-CSF, IL-2, IL-5, IL-8, IL-13 and IL-17A | IL-10, IL-18 | IL-4     |                                         |  |
|                                           |                                                                                                                            |              |          |                      |                                                                                                                            |              |          |                   |             |               |              |               |                                                                                                                            |              |          |                                         |  |
| Stock                                     | 10000.00                                                                                                                   | 50000.00     | 20000.00 | Stock                | 10000.00                                                                                                                   | 50000.00     | 20000.00 | N/Ap              | N/Ap        | N/Ap          | N/Ap         | N/Ap          | 10000.00                                                                                                                   | 50000.00     | 20000.00 |                                         |  |
| STD 9 (ULOQ2)*                            | 6000.00                                                                                                                    | 30000.00     | 12000.00 | Stock                | 10000.00                                                                                                                   | 50000.00     | 20000.00 | 350               | 210         | ( )           | 140          | ( )           | 6000.00                                                                                                                    | 30000.00     | 12000.00 |                                         |  |
| STD 8 *                                   | 4800.00                                                                                                                    | 24000.00     | 9600.00  | STD 9 (ULOQ2)*       | 6000.00                                                                                                                    | 30000.00     | 12000.00 | 205               | 164         | ( )           | 41           | ( )           | 4800.00                                                                                                                    | 24000.00     | 9600.00  |                                         |  |
| STD 7 (ULOQ1)                             | 2400.00                                                                                                                    | 12000.00     | 4800.00  | STD 8 *              | 4800.00                                                                                                                    | 24000.00     | 9600.00  | 260               | 130         | ( )           | 130          | ( )           | 2400.00                                                                                                                    | 12000.00     | 4800.00  |                                         |  |
| STD 6                                     | 1200.00                                                                                                                    | 6000.00      | 2400.00  | STD 7 (ULOQ1)        | 2400.00                                                                                                                    | 12000.00     | 4800.00  | 160               | 80          | ( )           | 80           | ( )           | 1200.00                                                                                                                    | 6000.00      | 2400.00  |                                         |  |
| STD 5                                     | 600.00                                                                                                                     | 3000.00      | 1200.00  | STD 6                | 1200.00                                                                                                                    | 6000.00      | 2400.00  | 166               | 83          | ( )           | 83           | ( )           | 600.00                                                                                                                     | 3000.00      | 1200.00  |                                         |  |
| STD 4                                     | 300.00                                                                                                                     | 1500.00      | 600.00   | STD 5                | 600.00                                                                                                                     | 3000.00      | 1200.00  | 180               | 90          | ( )           | 90           | ( )           | 300.00                                                                                                                     | 1500.00      | 600.00   |                                         |  |
| STD 3                                     | 150.00                                                                                                                     | 750.00       | 300.00   | STD 4                | 300.00                                                                                                                     | 1500.00      | 600.00   | 210               | 105         | ( )           | 105          | ( )           | 150.00                                                                                                                     | 750.00       | 300.00   |                                         |  |
| STD 2 (ULOQ2)                             | 75.00                                                                                                                      | 375.00       | 150.00   | STD 3                | 150.00                                                                                                                     | 750.00       | 300.00   | 270               | 135         | ( )           | 135          | ( )           | 75.00                                                                                                                      | 375.00       | 150.00   |                                         |  |
| STD 1 (ULOQ1)                             | 37.50                                                                                                                      | 187.50       | 75.00    | STD 2 (ULOQ2)        | 75.00                                                                                                                      | 375.00       | 150.00   | 180               | 90          | ( )           | 90           | ( )           | 37.50                                                                                                                      | 187.50       | 75.00    |                                         |  |
| STD 0                                     | 0.00                                                                                                                       | 0.00         | 0.00     | N/Ap                 | N/Ap                                                                                                                       | N/Ap         | N/Ap     | 75                | N/Ap        | N/Ap          | 75           | ( )           | 0.00                                                                                                                       | 0.00         | 0.00     |                                         |  |
| QC 3                                      | 3200.00                                                                                                                    | 16000.00     | 6400.00  | Stock                | 10000.00                                                                                                                   | 50000.00     | 20000.00 | 325               | 104         | ( )           | 221          | ( )           | 3200.00                                                                                                                    | 16000.00     | 6400.00  |                                         |  |
| QC3A                                      | 1600.00                                                                                                                    | 8000.00      | 3200.00  | QC 3                 | 3200.00                                                                                                                    | 16000.00     | 6400.00  | 176               | 88          | ( )           | 88           | ( )           | 1600.00                                                                                                                    | 8000.00      | 3200.00  |                                         |  |
| QC 2                                      | 1000.00                                                                                                                    | 5000.00      | 2000.00  | QC 3                 | 3200.00                                                                                                                    | 16000.00     | 6400.00  | 240               | 75          | ( )           | 165          | ( )           | 1000.00                                                                                                                    | 5000.00      | 2000.00  |                                         |  |
| QC 1                                      | 200.00                                                                                                                     | 1000.00      | 400.00   | QC 2                 | 1000.00                                                                                                                    | 5000.00      | 2000.00  | 175               | 35          | ( )           | 140          | ( )           | 200.00                                                                                                                     | 1000.00      | 400.00   |                                         |  |
| QC 1A                                     | 100.00                                                                                                                     | 500.00       | 200.00   | QC 2                 | 1000.00                                                                                                                    | 5000.00      | 2000.00  | 170               | 17          | ( )           | 153          | ( )           | 100.00                                                                                                                     | 500.00       | 200.00   |                                         |  |

Comments: \*= not applied for MCP-1 (refer to Appendix #5)

Spiking sheet verified by/ date: \_\_\_\_\_ Calculations verified by/ date: \_\_\_\_\_

Spiking performed by/ date: \_\_\_\_\_ Reviewed by/ date: \_\_\_\_\_

Appendix 1 (AP.BMK.mkpCyt.12)

Test Facility Study No. 5550014

Sponsor Reference No. UTSW-Gray-SPG50-004

**Appendix 11****Appendix 3****Cytokine Multiplex Assay sheet (Plate washer)**

Study/Reference No: \_\_\_\_\_ Assay I.D.: \_\_\_\_\_  
 Page: 1 of 10

| Reagents/ Working Solutions                 |                |                  |                                               |             |                  |
|---------------------------------------------|----------------|------------------|-----------------------------------------------|-------------|------------------|
| Name                                        | Batch or Lot # | Inventory number |                                               | Expiry Date | Entered by /Date |
|                                             |                | Assay ID:        | Assay ID:<br>or <input type="checkbox"/> N/Ap |             |                  |
| Non-Human primate Cytokine kit              |                |                  |                                               |             |                  |
| Non Human primate Detection Antibodies      |                |                  |                                               |             |                  |
| Assay Buffer                                |                |                  |                                               |             |                  |
| Bead diluent                                |                |                  |                                               |             |                  |
| Streptavidin-Phycoerythrin                  |                |                  |                                               |             |                  |
| Antibody-Immobilized Beads Working solution | ABWS-          | N/Ap             | N/Ap                                          |             |                  |
| Wash Buffer Cytokines                       | mkpCYT WB-     |                  |                                               |             |                  |
| Serum matrix                                | mkpSM-         | N/Ap             | N/Ap                                          |             |                  |
| Sheath fluid                                |                |                  |                                               |             |                  |
| UPW                                         | N/Ap           | N/Ap             | N/Ap                                          |             |                  |

**PLATE SEQUENCE (Printed from Watson)**

| In-Process Sample Storage                                                             |                                  | Performed ( v ) |     | Start time | Performed by / Date |
|---------------------------------------------------------------------------------------|----------------------------------|-----------------|-----|------------|---------------------|
| Assay ID:                                                                             | or N/Ap <input type="checkbox"/> |                 |     |            |                     |
| Samples transported from Sample Management                                            |                                  | Dry Ice         | ( ) | N/Ap       |                     |
| Samples thawed                                                                        |                                  | Wet ice         | ( ) |            |                     |
| Samples placed in temporary storage after use and until returned to Sample Management |                                  | Dry Ice         | ( ) |            |                     |
| In-Process Sample Storage                                                             |                                  | Performed ( v ) |     | Start time | Performed by / Date |
| Assay ID:                                                                             | or N/Ap <input type="checkbox"/> |                 |     |            |                     |
| Samples transported from Sample Management                                            |                                  | Dry Ice         | ( ) | N/Ap       |                     |
| Samples thawed                                                                        |                                  | Wet ice         | ( ) |            |                     |
| Samples placed in temporary storage after use and until returned to Sample Management |                                  | Dry Ice         | ( ) |            |                     |

Appendix 2a (AP.BMK.mkpCyt.12)

**Appendix 11****Appendix 3****Cytokine Multiplex Assay sheet (Plate washer)**

Study/Reference No: \_\_\_\_\_ Assay I.D.: \_\_\_\_\_  
Page: 2 of 10

| INSTRUMENTS                       |           |                          |
|-----------------------------------|-----------|--------------------------|
| <i>Name</i>                       | <i>ID</i> | <i>Entered by / Date</i> |
| Plate washer for magnetic beads   |           |                          |
| Pipettes                          |           |                          |
| Multichannel pipette              |           |                          |
| Sonicator bath                    |           |                          |
| Titer plate shaker set at 600 rpm |           |                          |
| Bio-Plex Suspension Array         |           |                          |

Comments: \_\_\_\_\_  
\_\_\_\_\_  
\_\_\_\_\_  
\_\_\_\_\_

## Appendix 11

### Appendix 3

#### Cytokine Multiplex Assay sheet (Plate washer)

Study/Reference No: \_\_\_\_\_ Assay I.D.: \_\_\_\_\_  
 Page: 3 of 10

| Steps                                                                                                                                                                                                                                         | Time /<br>Performed ( ✓ ) | Time /<br>Performed ( ✓ )                     | Performed by<br>/ Date |
|-----------------------------------------------------------------------------------------------------------------------------------------------------------------------------------------------------------------------------------------------|---------------------------|-----------------------------------------------|------------------------|
|                                                                                                                                                                                                                                               | Assay ID:                 | Assay ID:<br>or N/Ap <input type="checkbox"/> |                        |
| Allow reagents to reach ambient RT before starting the assay.                                                                                                                                                                                 | ( )                       | ( )                                           |                        |
| <b>Plate Preparation:</b> add 200 µL of Assay Buffer into each well of the microtiter plate. Cover the filter plate with an aluminum foil-wrapped plate cover and mix on a plate shaker set at 600 rpm at ambient RT for at least 10 minutes. | Start:                    | Start:                                        |                        |
|                                                                                                                                                                                                                                               | Finish:                   | Finish:                                       |                        |
| Prepare Standards and QCs at ambient RT and tQCs on wet ice, in polypropylene tubes.                                                                                                                                                          | ( )                       | ( )                                           |                        |
| Prepare diluted samples and keep on wet ice until loading as per Appendix #5                                                                                                                                                                  | ( ) or N/Ap ( )           | ( )                                           |                        |
| Remove Assay buffer by decanting manually and blot dry on absorbent papers.                                                                                                                                                                   | ( )                       | ( )                                           |                        |
| <b>Load:</b> Add 25 µL of each Standard, QCs and samples (if applicable) into the appropriate wells (preloading can be performed if desired).                                                                                                 | Preload( )<br>or N/Ap ( ) | Preload( )<br>or N/Ap ( )                     |                        |
|                                                                                                                                                                                                                                               | Load ( )                  | Load ( )                                      |                        |
| <b>Load:</b> Add 25 µL of Assay Buffer in all wells.                                                                                                                                                                                          | ( )                       | ( )                                           |                        |
| Sonicate for 30 seconds and vortex for 1 minute each bead vial used in the assay.<br>Prepare the Antibody-Immobilized Beads Working solution (code: ABWS).                                                                                    | ( )                       | ( )                                           |                        |
| <b>Beads:</b> Vortex beads bottle and add 25 µL of beads to each well.                                                                                                                                                                        | ( )                       | ( )                                           |                        |
| Cover the plate with an aluminum foil plate cover (protected from light), and incubate on a plate shaker set at 600 rpm at ambient RT for 2 hours (± 5 minutes).                                                                              | Start:                    | Start:                                        |                        |
|                                                                                                                                                                                                                                               | Finish:                   | Finish:                                       |                        |
| <b>Wash:</b> Wash the plate using Wash Buffer cytokines (Code: mkpCYT WB) and using the LUM MAG program as per recommendations in the AP.                                                                                                     | ( )                       | ( )                                           |                        |
| <b>Capture:</b> Add 25 µL of detection antibodies into each well.                                                                                                                                                                             | ( )                       | ( )                                           |                        |
| Cover the plate with an aluminum foil plate cover (protected from light), and incubate 1 hour (± 2 minutes) on a plate shaker set at 600 rpm at ambient RT. <b>DO NOT ASPIRATE AFTER INCUBATION.</b>                                          | Start:                    | Start:                                        |                        |
|                                                                                                                                                                                                                                               | Finish:                   | Finish:                                       |                        |
| <b>Detection:</b> Add 25 µL of streptavidin-phycoerythrin to each well.                                                                                                                                                                       | ( )                       | ( )                                           |                        |
| Cover the plate with an aluminum foil plate cover (protected from light) and incubate on a plate shaker set at 600 rpm at ambient RT for 30 minutes (± 1 minute).                                                                             | Start:                    | Start:                                        |                        |
|                                                                                                                                                                                                                                               | Finish:                   | Finish:                                       |                        |

Appendix 2a (AP.BMK.mkpCyt.12)

## Appendix 11

### Appendix 3

#### Cytokine Multiplex Assay sheet (Plate washer)

Study/Reference No: \_\_\_\_\_ Assay I.D.: \_\_\_\_\_  
 Page: 4 of 10

| Steps                                                                                                                                                                                                                      | Time /<br>Performed ( ✓ )           | Time /<br>Performed ( ✓ )                     | Performed by<br>/ Date |
|----------------------------------------------------------------------------------------------------------------------------------------------------------------------------------------------------------------------------|-------------------------------------|-----------------------------------------------|------------------------|
|                                                                                                                                                                                                                            | Assay ID:                           | Assay ID:<br>or N/Ap <input type="checkbox"/> |                        |
| <b>Wash:</b> Wash the plate using Wash Buffer cytokines (Code: mkpCyt WB) and using the LUM MAG program as per recommendations in the AP.                                                                                  | ( )                                 | ( )                                           |                        |
| <b>Add 150 µL</b> of Sheath fluid to all wells. Cover the filter plate with an aluminum foil-wrapped plate cover and resuspend the beads by shaking on a plate shaker set at 600 rpm at ambient RT for at least 5 minutes. | Start:                              | Start:                                        |                        |
|                                                                                                                                                                                                                            | Finish:                             | Finish:                                       |                        |
| Before reading the plate, always perform prime. Unclog is also needed, <u>except</u> if this is the first plate of the day after the calibration.                                                                          | Prime ( )<br>Unclog ( ) or N/Ap ( ) | Prime ( )<br>Unclog ( ) or N/Ap ( )           |                        |
| If unclog fails, Luminex needle sonicated and unclog repeated                                                                                                                                                              | Yes ( )    N/Ap ( )                 | Yes ( )    N/Ap ( )                           |                        |
| <b>Read:</b> Read plate on the Bio-Plex Suspension Assay System.                                                                                                                                                           | ( )                                 | ( )                                           |                        |
| Wash between plates was performed                                                                                                                                                                                          | Yes ( )    N/Ap ( )                 | Yes ( )    N/Ap ( )                           |                        |
| Instrument shutdown was performed                                                                                                                                                                                          | Yes ( )    N/Ap ( )                 | Yes ( )    N/Ap ( )                           |                        |

Appendix 2a (AP.BMK.mkpCyt.12)

Sponsor Reference No. UTSW-Gray-SPG50-004

Test Facility Study No. 5550014

**Appendix 11****Appendix 3****Cytokine Multiplex Assay sheet (Plate washer)**

Study/Reference No: \_\_\_\_\_

Assay I.D.: \_\_\_\_\_

Page: \_\_\_\_\_

5

of

10

| <b>SCIENTIFIC DATA REVIEW</b>                                                                            |                                                  |                                            |                                          |                                          |                                          |                                          |                                          |                                           |
|----------------------------------------------------------------------------------------------------------|--------------------------------------------------|--------------------------------------------|------------------------------------------|------------------------------------------|------------------------------------------|------------------------------------------|------------------------------------------|-------------------------------------------|
| Assay ID: _____                                                                                          |                                                  |                                            |                                          |                                          |                                          |                                          |                                          |                                           |
| Performed by (init./date): _____                                                                         |                                                  |                                            |                                          |                                          |                                          |                                          |                                          |                                           |
|                                                                                                          | IL-1 $\beta$<br>or <input type="checkbox"/> N/Ap | IL-1RA<br>or <input type="checkbox"/> N/Ap | IL-2<br>or <input type="checkbox"/> N/Ap | IL-4<br>or <input type="checkbox"/> N/Ap | IL-5<br>or <input type="checkbox"/> N/Ap | IL-6<br>or <input type="checkbox"/> N/Ap | IL-8<br>or <input type="checkbox"/> N/Ap | IL-10<br>or <input type="checkbox"/> N/Ap |
| Mean of (FI) Blank < Mean of (FI) LLOQ                                                                   | Yes or No                                        | Yes or No                                  | Yes or No                                | Yes or No                                | Yes or No                                | Yes or No                                | Yes or No                                | Yes or No                                 |
| Number of working standards within $\pm 25\%$ of the theoretical values ( $\pm 30\%$ for LLOQ and ULOQ): | /                                                | /                                          | /                                        | /                                        | /                                        | /                                        | /                                        | /                                         |
| <u>QC samples</u>                                                                                        |                                                  |                                            |                                          |                                          |                                          |                                          |                                          |                                           |
| Number of QC1A within acceptance criteria*:                                                              | /                                                | /                                          | /                                        | /                                        | /                                        | /                                        | /                                        | /                                         |
| Number of QC1 within acceptance criteria*:                                                               | /                                                | /                                          | /                                        | /                                        | /                                        | /                                        | /                                        | /                                         |
| Number of QC2 within acceptance criteria*:                                                               | /                                                | /                                          | /                                        | /                                        | /                                        | /                                        | /                                        | /                                         |
| Number of QC3A within acceptance criteria*:                                                              | /                                                | /                                          | /                                        | /                                        | /                                        | /                                        | /                                        | /                                         |
| Number of QC3 within acceptance criteria*:                                                               | /                                                | /                                          | /                                        | /                                        | /                                        | /                                        | /                                        | /                                         |
| Number of tQC within acceptance criteria*:                                                               | /                                                | /                                          | /                                        | /                                        | /                                        | /                                        | /                                        | /                                         |
| Number of beads acquired $\geq 30$ in all wells:                                                         | Yes or No                                        | Yes or No                                  | Yes or No                                | Yes or No                                | Yes or No                                | Yes or No                                | Yes or No                                | Yes or No                                 |
| Assay is acceptable:                                                                                     | Yes or No                                        | Yes or No                                  | Yes or No                                | Yes or No                                | Yes or No                                | Yes or No                                | Yes or No                                | Yes or No                                 |
| Samples to repeat:                                                                                       | Yes or No or N/Ap                                | Yes or No or N/Ap                          | Yes or No or N/Ap                        | Yes or No or N/Ap                        | Yes or No or N/Ap                        | Yes or No or N/Ap                        | Yes or No or N/Ap                        | Yes or No or N/Ap                         |

\*Concentration within 75-125% of theoretical, %CV  $\leq 20\%$  between duplicates.

Appendix 2a (AP.BMK.mkpCyt.12)

Test Facility Study No. 5550014

Sponsor Reference No. UTSW-Gray-SPG50-004

Sponsor Reference No. UTSW-Gray-SPG50-004

Test Facility Study No. 5550014

**Appendix 11****Appendix 3****Cytokine Multiplex Assay sheet (Plate washer)**

Study/Reference No: \_\_\_\_\_

Assay I.D.: \_\_\_\_\_

Page: \_\_\_\_\_

6

of

10

| <b>SCIENTIFIC DATA REVIEW</b>                                                                            |                                                       |                                           |                                           |                                            |                                           |                                                   |                                                   |                                           |
|----------------------------------------------------------------------------------------------------------|-------------------------------------------------------|-------------------------------------------|-------------------------------------------|--------------------------------------------|-------------------------------------------|---------------------------------------------------|---------------------------------------------------|-------------------------------------------|
| Assay ID: _____                                                                                          |                                                       |                                           |                                           |                                            |                                           |                                                   |                                                   |                                           |
| Performed by (init./date): _____                                                                         |                                                       |                                           |                                           |                                            |                                           |                                                   |                                                   |                                           |
|                                                                                                          | IL-12/23<br>(p40)<br>or <input type="checkbox"/> N/Ap | IL-13<br>or <input type="checkbox"/> N/Ap | IL-15<br>or <input type="checkbox"/> N/Ap | IL-17A<br>or <input type="checkbox"/> N/Ap | IL-18<br>or <input type="checkbox"/> N/Ap | IFN- $\gamma$<br>or <input type="checkbox"/> N/Ap | TNF- $\alpha$<br>or <input type="checkbox"/> N/Ap | MCP-1<br>or <input type="checkbox"/> N/Ap |
| Mean of (FI) Blank < Mean of (FI) LLOQ                                                                   | Yes or No                                             | Yes or No                                 | Yes or No                                 | Yes or No                                  | Yes or No                                 | Yes or No                                         | Yes or No                                         | Yes or No                                 |
| Number of working standards within $\pm 25\%$ of the theoretical values ( $\pm 30\%$ for LLOQ and ULOQ): | /                                                     | /                                         | /                                         | /                                          | /                                         | /                                                 | /                                                 | /                                         |
| <u>QC samples</u>                                                                                        |                                                       |                                           |                                           |                                            |                                           |                                                   |                                                   |                                           |
| Number of QC1A within acceptance criteria*:                                                              | /                                                     | /                                         | /                                         | /                                          | /                                         | /                                                 | /                                                 | /                                         |
| Number of QC1 within acceptance criteria*:                                                               | /                                                     | /                                         | /                                         | /                                          | /                                         | /                                                 | /                                                 | /                                         |
| Number of QC2 within acceptance criteria*:                                                               | /                                                     | /                                         | /                                         | /                                          | /                                         | /                                                 | /                                                 | /                                         |
| Number of QC3A within acceptance criteria*:                                                              | /                                                     | /                                         | /                                         | /                                          | /                                         | /                                                 | /                                                 | /                                         |
| Number of QC3 within acceptance criteria*:                                                               | /                                                     | /                                         | /                                         | /                                          | /                                         | /                                                 | /                                                 | /                                         |
| Number of tQC within acceptance criteria*:                                                               | /                                                     | /                                         | /                                         | /                                          | /                                         | /                                                 | /                                                 | /                                         |
| Number of beads acquired $\geq 30$ in all wells:                                                         | Yes or No                                             | Yes or No                                 | Yes or No                                 | Yes or No                                  | Yes or No                                 | Yes or No                                         | Yes or No                                         | Yes or No                                 |
| Assay is acceptable:                                                                                     | Yes or No                                             | Yes or No                                 | Yes or No                                 | Yes or No                                  | Yes or No                                 | Yes or No                                         | Yes or No                                         | Yes or No                                 |
| Samples to repeat:                                                                                       | Yes or No or N/Ap                                     | Yes or No or N/Ap                         | Yes or No or N/Ap                         | Yes or No or N/Ap                          | Yes or No or N/Ap                         | Yes or No or N/Ap                                 | Yes or No or N/Ap                                 | Yes or No or N/Ap                         |

\*Concentration within 75-125% of theoretical, %CV  $\leq 20\%$  between duplicates.

Appendix 2a (AP.BMK.mkpCyt.12)

Test Facility Study No. 5550014

Sponsor Reference No. UTSW-Gray-SPG50-004

Sponsor Reference No. UTSW-Gray-SPG50-004

Test Facility Study No. 5550014

**Appendix 11****Appendix 3****Cytokine Multiplex Assay sheet (Plate washer)**

Study/Reference No: \_\_\_\_\_

Assay I.D.: \_\_\_\_\_

Page: \_\_\_\_\_

7

of

10

| <b>SCIENTIFIC DATA REVIEW</b>                                                                            |                                                   |                                           |                                            |
|----------------------------------------------------------------------------------------------------------|---------------------------------------------------|-------------------------------------------|--------------------------------------------|
| Assay ID: _____                                                                                          |                                                   |                                           |                                            |
| Performed by (init./date): _____                                                                         |                                                   |                                           |                                            |
|                                                                                                          | MIP-1 $\beta$<br>or <input type="checkbox"/> N/Ap | G-CSF<br>or <input type="checkbox"/> N/Ap | GM-CSF<br>or <input type="checkbox"/> N/Ap |
| Mean of (FI) Blank < Mean of (FI) LLOQ                                                                   | Yes or No                                         | Yes or No                                 | Yes or No                                  |
| Number of working standards within $\pm 25\%$ of the theoretical values ( $\pm 30\%$ for LLOQ and ULOQ): | /                                                 | /                                         | /                                          |
| <u>QC samples</u>                                                                                        |                                                   |                                           |                                            |
| Number of QC1A within acceptance criteria*:                                                              | /                                                 | /                                         | /                                          |
| Number of QC1 within acceptance criteria*:                                                               | /                                                 | /                                         | /                                          |
| Number of QC2 within acceptance criteria*:                                                               | /                                                 | /                                         | /                                          |
| Number of QC3A within acceptance criteria*:                                                              | /                                                 | /                                         | /                                          |
| Number of QC3 within acceptance criteria*:                                                               | /                                                 | /                                         | /                                          |
| Number of tQC within acceptance criteria*:                                                               | /                                                 | /                                         | /                                          |
| Number of beads acquired $\geq 30$ in all wells:                                                         | Yes or No                                         | Yes or No                                 | Yes or No                                  |
| Assay is acceptable:                                                                                     | Yes or No                                         | Yes or No                                 | Yes or No                                  |
| Samples to repeat:                                                                                       | Yes or No or N/Ap                                 | Yes or No or N/Ap                         | Yes or No or N/Ap                          |

\*Concentration within 75-125% of theoretical, %CV  $\leq 20\%$  between duplicates.

Appendix 2a (AP.BMK.mkpCyt.12)

Test Facility Study No. 5550014

Sponsor Reference No. UTSW-Gray-SPG50-004

Sponsor Reference No. UTSW-Gray-SPG50-004

Test Facility Study No. 5550014

**Appendix 11****Appendix 3****Cytokine Multiplex Assay sheet (Plate washer)**

Study/Reference No: \_\_\_\_\_

Assay I.D.: \_\_\_\_\_

Page: \_\_\_\_\_

8

of

10

| <b>SCIENTIFIC DATA REVIEW</b>                                                                            |                                                  |                                            |                                          |                                          |                                          |                                          |                                          |                                           |
|----------------------------------------------------------------------------------------------------------|--------------------------------------------------|--------------------------------------------|------------------------------------------|------------------------------------------|------------------------------------------|------------------------------------------|------------------------------------------|-------------------------------------------|
| Assay ID: _____ or <input type="checkbox"/> N/Ap                                                         |                                                  |                                            |                                          |                                          |                                          |                                          |                                          |                                           |
| Performed by (init./date): _____                                                                         |                                                  |                                            |                                          |                                          |                                          |                                          |                                          |                                           |
|                                                                                                          | IL-1 $\beta$<br>or <input type="checkbox"/> N/Ap | IL-1RA<br>or <input type="checkbox"/> N/Ap | IL-2<br>or <input type="checkbox"/> N/Ap | IL-4<br>or <input type="checkbox"/> N/Ap | IL-5<br>or <input type="checkbox"/> N/Ap | IL-6<br>or <input type="checkbox"/> N/Ap | IL-8<br>or <input type="checkbox"/> N/Ap | IL-10<br>or <input type="checkbox"/> N/Ap |
| Mean of (FI) Blank < Mean of (FI) LLOQ                                                                   | Yes or No                                        | Yes or No                                  | Yes or No                                | Yes or No                                | Yes or No                                | Yes or No                                | Yes or No                                | Yes or No                                 |
| Number of working standards within $\pm 25\%$ of the theoretical values ( $\pm 30\%$ for LLOQ and ULOQ): | /                                                | /                                          | /                                        | /                                        | /                                        | /                                        | /                                        | /                                         |
| <u>QC samples</u>                                                                                        |                                                  |                                            |                                          |                                          |                                          |                                          |                                          |                                           |
| Number of QC1A within acceptance criteria*:                                                              | /                                                | /                                          | /                                        | /                                        | /                                        | /                                        | /                                        | /                                         |
| Number of QC1 within acceptance criteria*:                                                               | /                                                | /                                          | /                                        | /                                        | /                                        | /                                        | /                                        | /                                         |
| Number of QC2 within acceptance criteria*:                                                               | /                                                | /                                          | /                                        | /                                        | /                                        | /                                        | /                                        | /                                         |
| Number of QC3A within acceptance criteria*:                                                              | /                                                | /                                          | /                                        | /                                        | /                                        | /                                        | /                                        | /                                         |
| Number of QC3 within acceptance criteria*:                                                               | /                                                | /                                          | /                                        | /                                        | /                                        | /                                        | /                                        | /                                         |
| Number of tQC within acceptance criteria*:                                                               | /                                                | /                                          | /                                        | /                                        | /                                        | /                                        | /                                        | /                                         |
| Number of beads acquired $\geq 30$ in all wells:                                                         | Yes or No                                        | Yes or No                                  | Yes or No                                | Yes or No                                | Yes or No                                | Yes or No                                | Yes or No                                | Yes or No                                 |
| Assay is acceptable:                                                                                     | Yes or No                                        | Yes or No                                  | Yes or No                                | Yes or No                                | Yes or No                                | Yes or No                                | Yes or No                                | Yes or No                                 |
| Samples to repeat:                                                                                       | Yes or No or N/Ap                                | Yes or No or N/Ap                          | Yes or No or N/Ap                        | Yes or No or N/Ap                        | Yes or No or N/Ap                        | Yes or No or N/Ap                        | Yes or No or N/Ap                        | Yes or No or N/Ap                         |

\*Concentration within 75-125% of theoretical, %CV  $\leq 20\%$  between duplicates.

Appendix 2a (AP.BMK.mkpCyt.12)

Test Facility Study No. 5550014

Sponsor Reference No. UTSW-Gray-SPG50-004

Sponsor Reference No. UTSW-Gray-SPG50-004

Test Facility Study No. 5550014

**Appendix 11****Appendix 3****Cytokine Multiplex Assay sheet (Plate washer)**

Study/Reference No: \_\_\_\_\_

Assay I.D.: \_\_\_\_\_

Page: \_\_\_\_\_

9

of

10

| <b>SCIENTIFIC DATA REVIEW</b>                                                                            |                                                       |                                           |                                           |                                            |                                           |                                                   |                                                   |                                           |
|----------------------------------------------------------------------------------------------------------|-------------------------------------------------------|-------------------------------------------|-------------------------------------------|--------------------------------------------|-------------------------------------------|---------------------------------------------------|---------------------------------------------------|-------------------------------------------|
| Assay ID: _____ or <input type="checkbox"/> N/Ap                                                         |                                                       |                                           |                                           |                                            |                                           |                                                   |                                                   |                                           |
| Performed by (init./date): _____                                                                         |                                                       |                                           |                                           |                                            |                                           |                                                   |                                                   |                                           |
|                                                                                                          | IL-12/23<br>(p40)<br>or <input type="checkbox"/> N/Ap | IL-13<br>or <input type="checkbox"/> N/Ap | IL-15<br>or <input type="checkbox"/> N/Ap | IL-17A<br>or <input type="checkbox"/> N/Ap | IL-18<br>or <input type="checkbox"/> N/Ap | IFN- $\gamma$<br>or <input type="checkbox"/> N/Ap | TNF- $\alpha$<br>or <input type="checkbox"/> N/Ap | MCP-1<br>or <input type="checkbox"/> N/Ap |
| Mean of (FI) Blank < Mean of (FI) LLOQ                                                                   | Yes or No                                             | Yes or No                                 | Yes or No                                 | Yes or No                                  | Yes or No                                 | Yes or No                                         | Yes or No                                         | Yes or No                                 |
| Number of working standards within $\pm 25\%$ of the theoretical values ( $\pm 30\%$ for LLOQ and ULOQ): | /                                                     | /                                         | /                                         | /                                          | /                                         | /                                                 | /                                                 | /                                         |
| <u>QC samples</u>                                                                                        |                                                       |                                           |                                           |                                            |                                           |                                                   |                                                   |                                           |
| Number of QC1A within acceptance criteria*:                                                              | /                                                     | /                                         | /                                         | /                                          | /                                         | /                                                 | /                                                 | /                                         |
| Number of QC1 within acceptance criteria*:                                                               | /                                                     | /                                         | /                                         | /                                          | /                                         | /                                                 | /                                                 | /                                         |
| Number of QC2 within acceptance criteria*:                                                               | /                                                     | /                                         | /                                         | /                                          | /                                         | /                                                 | /                                                 | /                                         |
| Number of QC3A within acceptance criteria*:                                                              | /                                                     | /                                         | /                                         | /                                          | /                                         | /                                                 | /                                                 | /                                         |
| Number of QC3 within acceptance criteria*:                                                               | /                                                     | /                                         | /                                         | /                                          | /                                         | /                                                 | /                                                 | /                                         |
| Number of tQC within acceptance criteria*:                                                               | /                                                     | /                                         | /                                         | /                                          | /                                         | /                                                 | /                                                 | /                                         |
| Number of beads acquired $\geq 30$ in all wells:                                                         | Yes or No                                             | Yes or No                                 | Yes or No                                 | Yes or No                                  | Yes or No                                 | Yes or No                                         | Yes or No                                         | Yes or No                                 |
| Assay is acceptable:                                                                                     | Yes or No                                             | Yes or No                                 | Yes or No                                 | Yes or No                                  | Yes or No                                 | Yes or No                                         | Yes or No                                         | Yes or No                                 |
| Samples to repeat:                                                                                       | Yes or No or N/Ap                                     | Yes or No or N/Ap                         | Yes or No or N/Ap                         | Yes or No or N/Ap                          | Yes or No or N/Ap                         | Yes or No or N/Ap                                 | Yes or No or N/Ap                                 | Yes or No or N/Ap                         |

\*Concentration within 75-125% of theoretical, %CV  $\leq 20\%$  between duplicates.

Appendix 2a (AP.BMK.mkpCyt.12)

Test Facility Study No. 5550014

Sponsor Reference No. UTSW-Gray-SPG50-004

**Appendix 11****Appendix 3****Cytokine Multiplex Assay sheet (Plate washer)**

Study/Reference No: \_\_\_\_\_

Assay I.D.: \_\_\_\_\_

Page: \_\_\_\_\_

10

of

10

| <b>SCIENTIFIC DATA REVIEW</b>                                                                            |                                                                    |                                                  |                                                   |
|----------------------------------------------------------------------------------------------------------|--------------------------------------------------------------------|--------------------------------------------------|---------------------------------------------------|
| Assay ID: _____ or <input type="checkbox"/> N/Ap                                                         |                                                                    |                                                  |                                                   |
| Performed by (init./date): _____                                                                         |                                                                    |                                                  |                                                   |
|                                                                                                          | <b>MIP-1<math>\beta</math></b><br>or <input type="checkbox"/> N/Ap | <b>G-CSF</b><br>or <input type="checkbox"/> N/Ap | <b>GM-CSF</b><br>or <input type="checkbox"/> N/Ap |
| Mean of (FI) Blank < Mean of (FI) LLOQ                                                                   | Yes or No                                                          | Yes or No                                        | Yes or No                                         |
| Number of working standards within $\pm 25\%$ of the theoretical values ( $\pm 30\%$ for LLOQ and ULOQ): | /                                                                  | /                                                | /                                                 |
| <b>QC samples</b>                                                                                        |                                                                    |                                                  |                                                   |
| Number of QC1A within acceptance criteria*:                                                              | /                                                                  | /                                                | /                                                 |
| Number of QC1 within acceptance criteria*:                                                               | /                                                                  | /                                                | /                                                 |
| Number of QC2 within acceptance criteria*:                                                               | /                                                                  | /                                                | /                                                 |
| Number of QC3A within acceptance criteria*:                                                              | /                                                                  | /                                                | /                                                 |
| Number of QC3 within acceptance criteria*:                                                               | /                                                                  | /                                                | /                                                 |
| Number of tQC within acceptance criteria*:                                                               | /                                                                  | /                                                | /                                                 |
| Number of beads acquired $\geq 30$ in all wells:                                                         | Yes or No                                                          | Yes or No                                        | Yes or No                                         |
| Assay is acceptable:                                                                                     | Yes or No                                                          | Yes or No                                        | Yes or No                                         |
| Samples to repeat:                                                                                       | Yes or No or N/Ap                                                  | Yes or No or N/Ap                                | Yes or No or N/Ap                                 |

\*Concentration within 75-125% of theoretical, %CV  $\leq 20\%$  between duplicates.

Appendix #2 Reviewed by/date: \_\_\_\_\_

Appendix 2a (AP.BMK.mkpCyt.12)

# Appendix 11

## Appendix 3

### Cytokine Multiplex Assay sheet (Manual wash)

Study/Reference No: \_\_\_\_\_ Assay I.D.: \_\_\_\_\_  
 Page: \_\_\_\_\_ 1 \_\_\_\_\_ of \_\_\_\_\_ 10

| Reagents/ Working Solutions                 |                |                  |                                               |             |                  |
|---------------------------------------------|----------------|------------------|-----------------------------------------------|-------------|------------------|
| Name                                        | Batch or Lot # | Inventory number |                                               | Expiry Date | Entered by /Date |
|                                             |                | Assay ID:        | Assay ID:<br>or <input type="checkbox"/> N/Ap |             |                  |
| Non-Human primate Cytokine kit              |                |                  |                                               |             |                  |
| Non Human primate Detection Antibodies      |                |                  |                                               |             |                  |
| Assay Buffer                                |                |                  |                                               |             |                  |
| Bead diluent                                |                |                  |                                               |             |                  |
| Streptavidin-Phycoerythrin                  |                |                  |                                               |             |                  |
| Antibody-Immobilized Beads Working solution | ABWS-          | N/Ap             | N/Ap                                          |             |                  |
| Wash Buffer Cytokines                       | mkpCYT WB-     |                  |                                               |             |                  |
| Serum matrix                                | mkpSM-         | N/Ap             | N/Ap                                          |             |                  |
| Sheath fluid                                |                |                  |                                               |             |                  |
| UPW                                         | N/Ap           | N/Ap             | N/Ap                                          |             |                  |

### PLATE SEQUENCE (Printed from Watson)

| In-Process Sample Storage                                                             | Performed ( v ) |     | Start time | Performed by / Date |
|---------------------------------------------------------------------------------------|-----------------|-----|------------|---------------------|
| Assay ID: _____ or N/Ap <input type="checkbox"/>                                      |                 |     |            |                     |
| Samples transported from Sample Management                                            | Dry Ice         | ( ) | N/Ap       |                     |
| Samples thawed                                                                        | Wet ice         | ( ) |            |                     |
| Samples placed in temporary storage after use and until returned to Sample Management | Dry Ice         | ( ) |            |                     |
| In-Process Sample Storage                                                             | Performed ( v ) |     | Start time | Performed by / Date |
| Assay ID: _____ or N/Ap <input type="checkbox"/>                                      |                 |     |            |                     |
| Samples transported from Sample Management                                            | Dry Ice         | ( ) | N/Ap       |                     |
| Samples thawed                                                                        | Wet ice         | ( ) |            |                     |
| Samples placed in temporary storage after use and until returned to Sample Management | Dry Ice         | ( ) |            |                     |

Appendix 2b (AP.BMK.mkpCyt.12)

**Appendix 11**  
**Appendix 3****Cytokine Multiplex Assay sheet (Manual wash)**

Study/Reference No: \_\_\_\_\_ Assay I.D.: \_\_\_\_\_  
Page: 2 of 10

| INSTRUMENTS                                          |    |                   |
|------------------------------------------------------|----|-------------------|
| Name                                                 | ID | Entered by / Date |
| Pipettes                                             |    |                   |
| Multichannel pipette                                 |    |                   |
| Sonicator bath                                       |    |                   |
| Titer plate shaker set at 600 rpm                    |    |                   |
| Orbital plate shaker (orbit: 4 mm)<br>set at 600 rpm |    |                   |
| Bio-Plex Suspension Array                            |    |                   |

Comments: \_\_\_\_\_  
\_\_\_\_\_  
\_\_\_\_\_  
\_\_\_\_\_

Appendix 2b (AP.BMK.mkpCyt.12)

## Appendix 11

## Appendix 3

## Cytokine Multiplex Assay sheet (Manual wash)

Study/Reference No: \_\_\_\_\_ Assay I.D.: \_\_\_\_\_  
 Page: 3 of 10

| Steps                                                                                                                                                                                                                                                                                                                                                                                            | Time /<br>Performed ( ✓ ) | Time /<br>Performed ( ✓ )                     | Performed by<br>/ Date |
|--------------------------------------------------------------------------------------------------------------------------------------------------------------------------------------------------------------------------------------------------------------------------------------------------------------------------------------------------------------------------------------------------|---------------------------|-----------------------------------------------|------------------------|
|                                                                                                                                                                                                                                                                                                                                                                                                  | Assay ID:                 | Assay ID:<br>or N/Ap <input type="checkbox"/> |                        |
| Allow reagents to reach ambient RT before starting the assay.                                                                                                                                                                                                                                                                                                                                    | ( )                       | ( )                                           |                        |
| <b>Plate Preparation:</b> add 200 µL of Assay Buffer into each well of the microtiter plate. Cover the filter plate with an aluminum foil-wrapped plate cover and mix on a plate shaker set at 600 rpm at ambient RT for at least 10 minutes.                                                                                                                                                    | Start:                    | Start:                                        |                        |
|                                                                                                                                                                                                                                                                                                                                                                                                  | Finish:                   | Finish:                                       |                        |
| Prepare Standards and QCs at ambient RT and tQCs on wet ice, in polypropylene tubes.                                                                                                                                                                                                                                                                                                             | ( )                       | ( )                                           |                        |
| Prepare diluted samples and keep on wet ice until loading as per Appendix #5                                                                                                                                                                                                                                                                                                                     | ( ) or N/Ap ( )           | ( )                                           |                        |
| Remove Assay buffer by decanting manually and blot dry on absorbent papers.                                                                                                                                                                                                                                                                                                                      | ( )                       | ( )                                           |                        |
| <b>Load:</b> Add 25 µL of each Standard, QCs and samples (if applicable) into the appropriate wells (preloading can be performed if desired).                                                                                                                                                                                                                                                    | Preload( )<br>or N/Ap ( ) | Preload( )<br>or N/Ap ( )                     |                        |
|                                                                                                                                                                                                                                                                                                                                                                                                  | Load ( )                  | Load ( )                                      |                        |
| <b>Load:</b> Add 25 µL of Assay Buffer in all wells.                                                                                                                                                                                                                                                                                                                                             | ( )                       | ( )                                           |                        |
| Sonicate for 30 seconds and vortex for 1 minute each bead vial used in the assay.<br>Prepare the Antibody-Immobilized Beads Working solution (code: ABWS).                                                                                                                                                                                                                                       | ( )                       | ( )                                           |                        |
| <b>Beads:</b> Vortex beads bottle and add 25 µL of beads to each well.                                                                                                                                                                                                                                                                                                                           | ( )                       | ( )                                           |                        |
| Cover the plate with an aluminum foil plate cover (protected from light), and incubate on a plate shaker set at 600 rpm at ambient RT for 2 hours (± 5 minutes).                                                                                                                                                                                                                                 | Start:                    | Start:                                        |                        |
|                                                                                                                                                                                                                                                                                                                                                                                                  | Finish:                   | Finish:                                       |                        |
| <b>Manual Wash:</b> Rest plate on magnet for at least 60 seconds. Remove well contents by gently decanting the plate and gently tapping on absorbent paper. Remove plate from magnet, add 200µL/well of Wash Buffer (Code: mkpCYT WB) and shake for approx. 30 seconds on a plate shaker set at 600 rpm. Repeat the washing steps 2 times (total of 3 wash). Plate should not be allowed to dry. | 1 <sup>st</sup> wash ( )  | 1 <sup>st</sup> wash ( )                      |                        |
|                                                                                                                                                                                                                                                                                                                                                                                                  | 2 <sup>nd</sup> wash ( )  | 2 <sup>nd</sup> wash ( )                      |                        |
|                                                                                                                                                                                                                                                                                                                                                                                                  | 3 <sup>rd</sup> wash ( )  | 3 <sup>rd</sup> wash ( )                      |                        |
| <b>Capture:</b> Add 25 µL of detection antibodies into each well.                                                                                                                                                                                                                                                                                                                                | ( )                       | ( )                                           |                        |
| Cover the plate with an aluminum foil plate cover (protected from light), and incubate 1 hour (± 2 minutes) on a plate shaker set at 600 rpm at ambient RT. <b>DO NOT EMPTY THE WELL AFTER INCUBATION.</b>                                                                                                                                                                                       | Start:                    | Start:                                        |                        |
|                                                                                                                                                                                                                                                                                                                                                                                                  | Finish:                   | Finish:                                       |                        |
| <b>Detection:</b> Add 25 µL of streptavidin-phycoerythrin to each well.                                                                                                                                                                                                                                                                                                                          | ( )                       | ( )                                           |                        |
| Cover the plate with an aluminum foil plate cover (protected from light) and incubate on a plate shaker set at 600 rpm at ambient RT for 30 minutes (± 1 minute).                                                                                                                                                                                                                                | Start:                    | Start:                                        |                        |
|                                                                                                                                                                                                                                                                                                                                                                                                  | Finish:                   | Finish:                                       |                        |

Appendix 2b (AP.BMK.mkpCyt.12)

**Appendix 11**  
**Appendix 3****Cytokine Multiplex Assay sheet (Manual wash)**

Study/Reference No: \_\_\_\_\_ Assay I.D.: \_\_\_\_\_  
 Page: 4 of 10

| Steps                                                                                                                                                                                                                                                                                                                                                                                            | Time /<br>Performed ( ✓ )                                                        | Time /<br>Performed ( ✓ )                                                        | Performed by<br>/ Date |
|--------------------------------------------------------------------------------------------------------------------------------------------------------------------------------------------------------------------------------------------------------------------------------------------------------------------------------------------------------------------------------------------------|----------------------------------------------------------------------------------|----------------------------------------------------------------------------------|------------------------|
|                                                                                                                                                                                                                                                                                                                                                                                                  | Assay ID:                                                                        | Assay ID:<br>or N/Ap <input type="checkbox"/>                                    |                        |
| <b>Manual Wash:</b> Rest plate on magnet for at least 60 seconds. Remove well contents by gently decanting the plate and gently tapping on absorbent paper. Remove plate from magnet, add 200µL/well of Wash Buffer (Code: mkpCYT WB) and shake for approx. 30 seconds on a plate shaker set at 600 rpm. Repeat the washing steps 2 times (total of 3 wash). Plate should not be allowed to dry. | 1 <sup>st</sup> wash ( )<br>2 <sup>nd</sup> wash ( )<br>3 <sup>rd</sup> wash ( ) | 1 <sup>st</sup> wash ( )<br>2 <sup>nd</sup> wash ( )<br>3 <sup>rd</sup> wash ( ) |                        |
| Add 150 µL of Sheath fluid to all wells. Cover the filter plate with an aluminum foil-wrapped plate cover and resuspend the beads by shaking on a plate shaker set at 600 rpm at ambient RT for at least 5 minutes.                                                                                                                                                                              | Start:<br><br>Finish:                                                            | Start:<br><br>Finish:                                                            |                        |
| Before reading the plate, always perform prime. Unclog is also needed, <u>except</u> if this is the first plate of the day after the calibration.                                                                                                                                                                                                                                                | Prime ( )<br>Unclog ( ) or N/Ap ( )                                              | Prime ( )<br>Unclog ( ) or N/Ap ( )                                              |                        |
| If unclog fails, Luminex needle sonicated and unclog repeated                                                                                                                                                                                                                                                                                                                                    | Yes ( )    N/Ap ( )                                                              | Yes ( )    N/Ap ( )                                                              |                        |
| <b>Read:</b> Read plate on the Bio-Plex Suspension Assay System.                                                                                                                                                                                                                                                                                                                                 | ( )                                                                              | ( )                                                                              |                        |
| Wash between plates was performed                                                                                                                                                                                                                                                                                                                                                                | Yes ( )    N/Ap ( )                                                              | Yes ( )    N/Ap ( )                                                              |                        |
| Instrument shutdown was performed                                                                                                                                                                                                                                                                                                                                                                | Yes ( )    N/Ap ( )                                                              | Yes ( )    N/Ap ( )                                                              |                        |

Appendix 2b (AP.BMK.mkpCyt.12)

Sponsor Reference No. UTSW-Gray-SPG50-004

Test Facility Study No. 5550014

**Appendix 11****Appendix 3****Cytokine Multiplex Assay sheet (Manual wash)**

Study/Reference No: \_\_\_\_\_

Assay I.D.: \_\_\_\_\_

Page: \_\_\_\_\_

5

of

10

| <b>SCIENTIFIC DATA REVIEW</b>                                                                            |                                                  |                                            |                                          |                                          |                                          |                                          |                                          |                                           |
|----------------------------------------------------------------------------------------------------------|--------------------------------------------------|--------------------------------------------|------------------------------------------|------------------------------------------|------------------------------------------|------------------------------------------|------------------------------------------|-------------------------------------------|
| Assay ID: _____                                                                                          |                                                  |                                            |                                          |                                          |                                          |                                          |                                          |                                           |
| Performed by (init./date): _____                                                                         |                                                  |                                            |                                          |                                          |                                          |                                          |                                          |                                           |
|                                                                                                          | IL-1 $\beta$<br>or <input type="checkbox"/> N/Ap | IL-1RA<br>or <input type="checkbox"/> N/Ap | IL-2<br>or <input type="checkbox"/> N/Ap | IL-4<br>or <input type="checkbox"/> N/Ap | IL-5<br>or <input type="checkbox"/> N/Ap | IL-6<br>or <input type="checkbox"/> N/Ap | IL-8<br>or <input type="checkbox"/> N/Ap | IL-10<br>or <input type="checkbox"/> N/Ap |
| Mean of (FI) Blank < Mean of (FI) LLOQ                                                                   | Yes or No                                        | Yes or No                                  | Yes or No                                | Yes or No                                | Yes or No                                | Yes or No                                | Yes or No                                | Yes or No                                 |
| Number of working standards within $\pm 25\%$ of the theoretical values ( $\pm 30\%$ for LLOQ and ULOQ): | /                                                | /                                          | /                                        | /                                        | /                                        | /                                        | /                                        | /                                         |
| <u>QC samples</u>                                                                                        |                                                  |                                            |                                          |                                          |                                          |                                          |                                          |                                           |
| Number of QC1A within acceptance criteria*:                                                              | /                                                | /                                          | /                                        | /                                        | /                                        | /                                        | /                                        | /                                         |
| Number of QC1 within acceptance criteria*:                                                               | /                                                | /                                          | /                                        | /                                        | /                                        | /                                        | /                                        | /                                         |
| Number of QC2 within acceptance criteria*:                                                               | /                                                | /                                          | /                                        | /                                        | /                                        | /                                        | /                                        | /                                         |
| Number of QC3A within acceptance criteria*:                                                              | /                                                | /                                          | /                                        | /                                        | /                                        | /                                        | /                                        | /                                         |
| Number of QC3 within acceptance criteria*:                                                               | /                                                | /                                          | /                                        | /                                        | /                                        | /                                        | /                                        | /                                         |
| Number of tQC within acceptance criteria*:                                                               | /                                                | /                                          | /                                        | /                                        | /                                        | /                                        | /                                        | /                                         |
| Number of beads acquired $\geq 30$ in all wells:                                                         | Yes or No                                        | Yes or No                                  | Yes or No                                | Yes or No                                | Yes or No                                | Yes or No                                | Yes or No                                | Yes or No                                 |
| Assay is acceptable:                                                                                     | Yes or No                                        | Yes or No                                  | Yes or No                                | Yes or No                                | Yes or No                                | Yes or No                                | Yes or No                                | Yes or No                                 |
| Samples to repeat:                                                                                       | Yes or No or N/Ap                                | Yes or No or N/Ap                          | Yes or No or N/Ap                        | Yes or No or N/Ap                        | Yes or No or N/Ap                        | Yes or No or N/Ap                        | Yes or No or N/Ap                        | Yes or No or N/Ap                         |

\*Concentration within 75-125% of theoretical, %CV  $\leq 20\%$  between duplicates.

Appendix 2b (AP.BMK.mkpCyt.12)

Test Facility Study No. 5550014

Sponsor Reference No. UTSW-Gray-SPG50-004

Sponsor Reference No. UTSW-Gray-SPG50-004

Test Facility Study No. 5550014

**Appendix 11****Appendix 3****Cytokine Multiplex Assay sheet (Manual wash)**

Study/Reference No: \_\_\_\_\_

Assay I.D.: \_\_\_\_\_

Page: \_\_\_\_\_

6

of

10

| <b>SCIENTIFIC DATA REVIEW</b>                                                                            |                                                       |                                           |                                           |                                            |                                           |                                                   |                                                   |                                           |
|----------------------------------------------------------------------------------------------------------|-------------------------------------------------------|-------------------------------------------|-------------------------------------------|--------------------------------------------|-------------------------------------------|---------------------------------------------------|---------------------------------------------------|-------------------------------------------|
| Assay ID: _____                                                                                          |                                                       |                                           |                                           |                                            |                                           |                                                   |                                                   |                                           |
| Performed by (init./date): _____                                                                         |                                                       |                                           |                                           |                                            |                                           |                                                   |                                                   |                                           |
|                                                                                                          | IL-12/23<br>(p40)<br>or <input type="checkbox"/> N/Ap | IL-13<br>or <input type="checkbox"/> N/Ap | IL-15<br>or <input type="checkbox"/> N/Ap | IL-17A<br>or <input type="checkbox"/> N/Ap | IL-18<br>or <input type="checkbox"/> N/Ap | IFN- $\gamma$<br>or <input type="checkbox"/> N/Ap | TNF- $\alpha$<br>or <input type="checkbox"/> N/Ap | MCP-1<br>or <input type="checkbox"/> N/Ap |
| Mean of (FI) Blank < Mean of (FI) LLOQ                                                                   | Yes or No                                             | Yes or No                                 | Yes or No                                 | Yes or No                                  | Yes or No                                 | Yes or No                                         | Yes or No                                         | Yes or No                                 |
| Number of working standards within $\pm 25\%$ of the theoretical values ( $\pm 30\%$ for LLOQ and ULOQ): | /                                                     | /                                         | /                                         | /                                          | /                                         | /                                                 | /                                                 | /                                         |
| <u>QC samples</u>                                                                                        |                                                       |                                           |                                           |                                            |                                           |                                                   |                                                   |                                           |
| Number of QC1A within acceptance criteria*:                                                              | /                                                     | /                                         | /                                         | /                                          | /                                         | /                                                 | /                                                 | /                                         |
| Number of QC1 within acceptance criteria*:                                                               | /                                                     | /                                         | /                                         | /                                          | /                                         | /                                                 | /                                                 | /                                         |
| Number of QC2 within acceptance criteria*:                                                               | /                                                     | /                                         | /                                         | /                                          | /                                         | /                                                 | /                                                 | /                                         |
| Number of QC3A within acceptance criteria*:                                                              | /                                                     | /                                         | /                                         | /                                          | /                                         | /                                                 | /                                                 | /                                         |
| Number of QC3 within acceptance criteria*:                                                               | /                                                     | /                                         | /                                         | /                                          | /                                         | /                                                 | /                                                 | /                                         |
| Number of tQC within acceptance criteria*:                                                               | /                                                     | /                                         | /                                         | /                                          | /                                         | /                                                 | /                                                 | /                                         |
| Number of beads acquired $\geq 30$ in all wells:                                                         | Yes or No                                             | Yes or No                                 | Yes or No                                 | Yes or No                                  | Yes or No                                 | Yes or No                                         | Yes or No                                         | Yes or No                                 |
| Assay is acceptable:                                                                                     | Yes or No                                             | Yes or No                                 | Yes or No                                 | Yes or No                                  | Yes or No                                 | Yes or No                                         | Yes or No                                         | Yes or No                                 |
| Samples to repeat:                                                                                       | Yes or No or N/Ap                                     | Yes or No or N/Ap                         | Yes or No or N/Ap                         | Yes or No or N/Ap                          | Yes or No or N/Ap                         | Yes or No or N/Ap                                 | Yes or No or N/Ap                                 | Yes or No or N/Ap                         |

\*Concentration within 75-125% of theoretical, %CV  $\leq 20\%$  between duplicates.

Appendix 2b (AP.BMK.mkpCyt.12)

Test Facility Study No. 5550014

Sponsor Reference No. UTSW-Gray-SPG50-004

Sponsor Reference No. UTSW-Gray-SPG50-004

Test Facility Study No. 5550014

**Appendix 11****Appendix 3****Cytokine Multiplex Assay sheet (Manual wash)**

Study/Reference No: \_\_\_\_\_

Assay I.D.: \_\_\_\_\_

Page: \_\_\_\_\_

7

of

10

| <b>SCIENTIFIC DATA REVIEW</b>                                                                            |                                                   |                                           |                                            |
|----------------------------------------------------------------------------------------------------------|---------------------------------------------------|-------------------------------------------|--------------------------------------------|
| Assay ID: _____                                                                                          |                                                   |                                           |                                            |
| Performed by (init./date): _____                                                                         |                                                   |                                           |                                            |
|                                                                                                          | MIP-1 $\beta$<br>or <input type="checkbox"/> N/Ap | G-CSF<br>or <input type="checkbox"/> N/Ap | GM-CSF<br>or <input type="checkbox"/> N/Ap |
| Mean of (FI) Blank < Mean of (FI) LLOQ                                                                   | Yes or No                                         | Yes or No                                 | Yes or No                                  |
| Number of working standards within $\pm 25\%$ of the theoretical values ( $\pm 30\%$ for LLOQ and ULOQ): | /                                                 | /                                         | /                                          |
| <u>QC samples</u>                                                                                        |                                                   |                                           |                                            |
| Number of QC1A within acceptance criteria*:                                                              | /                                                 | /                                         | /                                          |
| Number of QC1 within acceptance criteria*:                                                               | /                                                 | /                                         | /                                          |
| Number of QC2 within acceptance criteria*:                                                               | /                                                 | /                                         | /                                          |
| Number of QC3A within acceptance criteria*:                                                              | /                                                 | /                                         | /                                          |
| Number of QC3 within acceptance criteria*:                                                               | /                                                 | /                                         | /                                          |
| Number of tQC within acceptance criteria*:                                                               | /                                                 | /                                         | /                                          |
| Number of beads acquired $\geq 30$ in all wells:                                                         | Yes or No                                         | Yes or No                                 | Yes or No                                  |
| Assay is acceptable:                                                                                     | Yes or No                                         | Yes or No                                 | Yes or No                                  |
| Samples to repeat:                                                                                       | Yes or No or N/Ap                                 | Yes or No or N/Ap                         | Yes or No or N/Ap                          |

\*Concentration within 75-125% of theoretical, %CV  $\leq 20\%$  between duplicates.

Appendix 2b (AP.BMK.mkpCyt.12)

Test Facility Study No. 5550014

Sponsor Reference No. UTSW-Gray-SPG50-004

Sponsor Reference No. UTSW-Gray-SPG50-004

Test Facility Study No. 5550014

**Appendix 11****Appendix 3****Cytokine Multiplex Assay sheet (Manual wash)**

Study/Reference No: \_\_\_\_\_

Assay I.D.: \_\_\_\_\_

Page: \_\_\_\_\_

8

of

10

| <b>Assay ID: _____ or <input type="checkbox"/> N/Ap</b><br><b>Performed by (init./date): _____</b>       |                                                  |                                            |                                          |                                          |                                          |                                          |                                          |                                           |
|----------------------------------------------------------------------------------------------------------|--------------------------------------------------|--------------------------------------------|------------------------------------------|------------------------------------------|------------------------------------------|------------------------------------------|------------------------------------------|-------------------------------------------|
|                                                                                                          | IL-1 $\beta$<br>or <input type="checkbox"/> N/Ap | IL-1RA<br>or <input type="checkbox"/> N/Ap | IL-2<br>or <input type="checkbox"/> N/Ap | IL-4<br>or <input type="checkbox"/> N/Ap | IL-5<br>or <input type="checkbox"/> N/Ap | IL-6<br>or <input type="checkbox"/> N/Ap | IL-8<br>or <input type="checkbox"/> N/Ap | IL-10<br>or <input type="checkbox"/> N/Ap |
| Mean of (FI) Blank < Mean of (FI) LLOQ                                                                   | Yes or No                                        | Yes or No                                  | Yes or No                                | Yes or No                                | Yes or No                                | Yes or No                                | Yes or No                                | Yes or No                                 |
| Number of working standards within $\pm 25\%$ of the theoretical values ( $\pm 30\%$ for LLOQ and ULOQ): | /                                                | /                                          | /                                        | /                                        | /                                        | /                                        | /                                        | /                                         |
| <b>QC samples</b>                                                                                        |                                                  |                                            |                                          |                                          |                                          |                                          |                                          |                                           |
| Number of QC1A within acceptance criteria*:                                                              | /                                                | /                                          | /                                        | /                                        | /                                        | /                                        | /                                        | /                                         |
| Number of QC1 within acceptance criteria*:                                                               | /                                                | /                                          | /                                        | /                                        | /                                        | /                                        | /                                        | /                                         |
| Number of QC2 within acceptance criteria*:                                                               | /                                                | /                                          | /                                        | /                                        | /                                        | /                                        | /                                        | /                                         |
| Number of QC3A within acceptance criteria*:                                                              | /                                                | /                                          | /                                        | /                                        | /                                        | /                                        | /                                        | /                                         |
| Number of QC3 within acceptance criteria*:                                                               | /                                                | /                                          | /                                        | /                                        | /                                        | /                                        | /                                        | /                                         |
| Number of tQC within acceptance criteria*:                                                               | /                                                | /                                          | /                                        | /                                        | /                                        | /                                        | /                                        | /                                         |
| Number of beads acquired $\geq 30$ in all wells:                                                         | Yes or No                                        | Yes or No                                  | Yes or No                                | Yes or No                                | Yes or No                                | Yes or No                                | Yes or No                                | Yes or No                                 |
| Assay is acceptable:                                                                                     | Yes or No                                        | Yes or No                                  | Yes or No                                | Yes or No                                | Yes or No                                | Yes or No                                | Yes or No                                | Yes or No                                 |
| Samples to repeat:                                                                                       | Yes or No or N/Ap                                | Yes or No or N/Ap                          | Yes or No or N/Ap                        | Yes or No or N/Ap                        | Yes or No or N/Ap                        | Yes or No or N/Ap                        | Yes or No or N/Ap                        | Yes or No or N/Ap                         |

\*Concentration within 75-125% of theoretical, %CV  $\leq 20\%$  between duplicates.

Appendix 2b (AP.BMK.mkpCyt.12)

Test Facility Study No. 5550014

Sponsor Reference No. UTSW-Gray-SPG50-004

Sponsor Reference No. UTSW-Gray-SPG50-004

Test Facility Study No. 5550014

**Appendix 11****Appendix 3****Cytokine Multiplex Assay sheet (Manual wash)**

Study/Reference No: \_\_\_\_\_

Assay I.D.: \_\_\_\_\_

Page: \_\_\_\_\_

9

of

10

| <b>SCIENTIFIC DATA REVIEW</b>                                                                            |                                                       |                                           |                                           |                                            |                                           |                                                   |                                                   |                                           |
|----------------------------------------------------------------------------------------------------------|-------------------------------------------------------|-------------------------------------------|-------------------------------------------|--------------------------------------------|-------------------------------------------|---------------------------------------------------|---------------------------------------------------|-------------------------------------------|
| Assay ID: _____ or <input type="checkbox"/> N/Ap                                                         |                                                       |                                           |                                           |                                            |                                           |                                                   |                                                   |                                           |
| Performed by (init./date): _____                                                                         |                                                       |                                           |                                           |                                            |                                           |                                                   |                                                   |                                           |
|                                                                                                          | IL-12/23<br>(p40)<br>or <input type="checkbox"/> N/Ap | IL-13<br>or <input type="checkbox"/> N/Ap | IL-15<br>or <input type="checkbox"/> N/Ap | IL-17A<br>or <input type="checkbox"/> N/Ap | IL-18<br>or <input type="checkbox"/> N/Ap | IFN- $\gamma$<br>or <input type="checkbox"/> N/Ap | TNF- $\alpha$<br>or <input type="checkbox"/> N/Ap | MCP-1<br>or <input type="checkbox"/> N/Ap |
| Mean of (FI) Blank < Mean of (FI) LLOQ                                                                   | Yes or No                                             | Yes or No                                 | Yes or No                                 | Yes or No                                  | Yes or No                                 | Yes or No                                         | Yes or No                                         | Yes or No                                 |
| Number of working standards within $\pm 25\%$ of the theoretical values ( $\pm 30\%$ for LLOQ and ULOQ): | /                                                     | /                                         | /                                         | /                                          | /                                         | /                                                 | /                                                 | /                                         |
| <u>QC samples</u>                                                                                        |                                                       |                                           |                                           |                                            |                                           |                                                   |                                                   |                                           |
| Number of QC1A within acceptance criteria*:                                                              | /                                                     | /                                         | /                                         | /                                          | /                                         | /                                                 | /                                                 | /                                         |
| Number of QC1 within acceptance criteria*:                                                               | /                                                     | /                                         | /                                         | /                                          | /                                         | /                                                 | /                                                 | /                                         |
| Number of QC2 within acceptance criteria*:                                                               | /                                                     | /                                         | /                                         | /                                          | /                                         | /                                                 | /                                                 | /                                         |
| Number of QC3A within acceptance criteria*:                                                              | /                                                     | /                                         | /                                         | /                                          | /                                         | /                                                 | /                                                 | /                                         |
| Number of QC3 within acceptance criteria*:                                                               | /                                                     | /                                         | /                                         | /                                          | /                                         | /                                                 | /                                                 | /                                         |
| Number of tQC within acceptance criteria*:                                                               | /                                                     | /                                         | /                                         | /                                          | /                                         | /                                                 | /                                                 | /                                         |
| Number of beads acquired $\geq 30$ in all wells:                                                         | Yes or No                                             | Yes or No                                 | Yes or No                                 | Yes or No                                  | Yes or No                                 | Yes or No                                         | Yes or No                                         | Yes or No                                 |
| Assay is acceptable:                                                                                     | Yes or No                                             | Yes or No                                 | Yes or No                                 | Yes or No                                  | Yes or No                                 | Yes or No                                         | Yes or No                                         | Yes or No                                 |
| Samples to repeat:                                                                                       | Yes or No or N/Ap                                     | Yes or No or N/Ap                         | Yes or No or N/Ap                         | Yes or No or N/Ap                          | Yes or No or N/Ap                         | Yes or No or N/Ap                                 | Yes or No or N/Ap                                 | Yes or No or N/Ap                         |

\*Concentration within 75-125% of theoretical, %CV  $\leq 20\%$  between duplicates.

Appendix 2b (AP.BMK.mkpCyt.12)

Test Facility Study No. 5550014

Sponsor Reference No. UTSW-Gray-SPG50-004

Sponsor Reference No. UTSW-Gray-SPG50-004

Test Facility Study No. 5550014

**Appendix 11****Appendix 3****Cytokine Multiplex Assay sheet (Manual wash)**

Study/Reference No: \_\_\_\_\_

Assay I.D.: \_\_\_\_\_

Page: \_\_\_\_\_

10

of

10

| <b>SCIENTIFIC DATA REVIEW</b>                                                                            |                                                   |                                           |                                            |
|----------------------------------------------------------------------------------------------------------|---------------------------------------------------|-------------------------------------------|--------------------------------------------|
| Assay ID: _____ or <input type="checkbox"/> N/Ap                                                         |                                                   |                                           |                                            |
| Performed by (init./date): _____                                                                         |                                                   |                                           |                                            |
|                                                                                                          | MIP-1 $\beta$<br>or <input type="checkbox"/> N/Ap | G-CSF<br>or <input type="checkbox"/> N/Ap | GM-CSF<br>or <input type="checkbox"/> N/Ap |
| Mean of (FI) Blank < Mean of (FI) LLOQ                                                                   | Yes or No                                         | Yes or No                                 | Yes or No                                  |
| Number of working standards within $\pm 25\%$ of the theoretical values ( $\pm 30\%$ for LLOQ and ULOQ): | /                                                 | /                                         | /                                          |
| <u>QC samples</u>                                                                                        |                                                   |                                           |                                            |
| Number of QC1A within acceptance criteria*:                                                              | /                                                 | /                                         | /                                          |
| Number of QC1 within acceptance criteria*:                                                               | /                                                 | /                                         | /                                          |
| Number of QC2 within acceptance criteria*:                                                               | /                                                 | /                                         | /                                          |
| Number of QC3A within acceptance criteria*:                                                              | /                                                 | /                                         | /                                          |
| Number of QC3 within acceptance criteria*:                                                               | /                                                 | /                                         | /                                          |
| Number of tQC within acceptance criteria*:                                                               | /                                                 | /                                         | /                                          |
| Number of beads acquired $\geq 30$ in all wells:                                                         | Yes or No                                         | Yes or No                                 | Yes or No                                  |
| Assay is acceptable:                                                                                     | Yes or No                                         | Yes or No                                 | Yes or No                                  |
| Samples to repeat:                                                                                       | Yes or No or N/Ap                                 | Yes or No or N/Ap                         | Yes or No or N/Ap                          |

\*Concentration within 75-125% of theoretical, %CV  $\leq 20\%$  between duplicates.

Appendix #2 Reviewed by/date: \_\_\_\_\_

Appendix 2b (AP.BMK.mkpCyt.12)

Test Facility Study No. 5550014

Sponsor Reference No. UTSW-Gray-SPG50-004

Sponsor Reference No. UTSW-Gray-SPG50-004

Test Facility Study No. 5550014

**Appendix 11****Appendix 3**

## Daily Solution Preparation Sheet

Study/Reference no: \_\_\_\_\_ Assay ID: \_\_\_\_\_

Preparation of: Antibody-Immobilized Beads Working Solution (code: ABWS)

Note: if not all cytokines are needed to be analyzed, Bead Diluent should be used to replace the missing antibody-bead volume. The total volume of the solution needs to be 3.000 mL. (Dilution 1/50)

| Batch #       | Reagents**           | Lot/Batch no | Inventory Number | *Calculated Volume units (μL) | Actual Volume units (μL) | Performed by & Date | *Calculations verified by/date: |
|---------------|----------------------|--------------|------------------|-------------------------------|--------------------------|---------------------|---------------------------------|
|               | Bead Diluent         |              |                  |                               |                          |                     |                                 |
|               | IL-1β Beads          |              |                  |                               |                          |                     |                                 |
|               | IL-1RA Beads         |              |                  |                               |                          |                     |                                 |
|               | IL-6 Beads           |              |                  |                               |                          |                     |                                 |
|               | IL-10 Beads          |              |                  |                               |                          |                     |                                 |
|               | IL-12/23 (p40) Beads |              |                  |                               |                          |                     |                                 |
|               | IL-15 Beads          |              |                  |                               |                          |                     |                                 |
|               | IL-18 Beads          |              |                  |                               |                          |                     |                                 |
|               | IFN-γ Beads          |              |                  |                               |                          |                     |                                 |
|               | TNF-α Beads          |              |                  |                               |                          |                     |                                 |
|               | MCP-1 Beads          |              |                  |                               |                          |                     |                                 |
|               | MIP-1β Beads         |              |                  |                               |                          |                     |                                 |
|               | G-CSF Beads          |              |                  |                               |                          |                     |                                 |
|               | GM-CSF               |              |                  |                               |                          |                     |                                 |
|               | IL-2                 |              |                  |                               |                          |                     |                                 |
|               | IL-4                 |              |                  |                               |                          |                     |                                 |
|               | IL-5                 |              |                  |                               |                          |                     |                                 |
|               | IL-8                 |              |                  |                               |                          |                     |                                 |
|               | IL-13                |              |                  |                               |                          |                     |                                 |
|               | IL-17A               |              |                  |                               |                          |                     |                                 |
| Total volume: |                      |              |                  |                               |                          |                     |                                 |

\* Applicable only when the volumes are scaled up or down.

\*\* Note: the antibody-beads bottles should be sonicated for 30 seconds and then vortex for 1 minute prior to the preparation of the ABWS (refer to AP).

Reviewed by/date: \_\_\_\_\_

Appendix #3 (AP.BMK.mkpCyt.12)

Test Facility Study No. 5550014

Sponsor Reference No. UTSW-Gray-SPG50-004

Sponsor Reference No. UTSW-Gray-SPG50-004

Test Facility Study No. 5550014

**Appendix 11****Appendix 3**

## Solution Preparation Sheet

Study/Reference no: \_\_\_\_\_

Preparation **Wash Buffer Cytokines (Code: mkpCYTWB)**Storage Location: \_\_\_\_\_ or discarded after use ☐

Solution Expiration date: \_\_\_\_\_

| Batch no  | Reagents                      | Lot no | Expiry date | Inventory Number | *Calculated Volume units | Actual Volume units | Prepared by & Date | *Calculations verified by/date: |
|-----------|-------------------------------|--------|-------------|------------------|--------------------------|---------------------|--------------------|---------------------------------|
| mkpCYTWB/ | Wash Buffer Concentrate (10X) |        |             |                  |                          |                     |                    |                                 |
|           | Ultra Pure Water              | N/Ap   |             | N/Ap             |                          |                     |                    |                                 |
|           |                               |        |             | Total volume:    |                          |                     |                    |                                 |

\*Applicable only when the volumes are scaled up or down

Comments \_\_\_\_\_

\_\_\_\_\_

\_\_\_\_\_

\_\_\_\_\_

Reviewed by/Date: \_\_\_\_\_

Appendix #4 (AP.BMK.mkpCyt.12)

Test Facility Study No. 5550014

Sponsor Reference No. UTSW-Gray-SPG50-004

## Appendix 11

### Appendix 3

#### Assay Instructions Sheet

Study/Reference No.: \_\_\_\_\_

Assay ID: \_\_\_\_\_

Lot of Kit and lot of STD stock to be used: \_\_\_\_\_

Kit and STD qualified in assay ID: \_\_\_\_\_

- Analyze samples on wet ice and diluted as per provided dilution sheet

Table 1 The following tQC should be use for the assay

| QC Identification | Monkey Plasma lot# | Location in a freezer set to maintain -80°C or -20°C | tQC concentration | Source assay and study ID | Source Assay Date <sup>a</sup> |
|-------------------|--------------------|------------------------------------------------------|-------------------|---------------------------|--------------------------------|
| tQC               |                    |                                                      |                   |                           |                                |

<sup>a</sup> Refer to AP for QC samples stability. **The expiry date on the label of the neat matrix should be SIP.**  
tQC is to be prepared as per Appendix #6 and/or Dilution sheet.

Table 2 Cytokine concentrations

| Standards ID           | Cytokine Concentrations (pg/mL)                                                                                        |                            |                                            |                 |                           |
|------------------------|------------------------------------------------------------------------------------------------------------------------|----------------------------|--------------------------------------------|-----------------|---------------------------|
|                        | IL-1 $\beta$ , IL-1RA, IL-6, IL-15, IFN- $\gamma$ , TNF- $\alpha$ , MIP-1 $\beta$ , IL-2, IL-5, IL-8, IL-13 and IL-17A | MCP-1                      | IL-12/23 (p40), G-CSF, GM-CSF <sup>f</sup> | IL-10, IL-18    | IL-4                      |
| <b>STD 9 (ULOQ2)</b>   | <b>6000.00</b>                                                                                                         | 6000.00 <sup>b</sup>       | <b>6000.00</b>                             | <b>30000.00</b> | <b>12000.00</b>           |
| STD 8                  | 4800.00                                                                                                                | 4800.00 <sup>b</sup>       | 4800.00                                    | 24000.00        | 9600.00                   |
| <b>STD 7 (ULOQ1)</b>   | <b>2400.00</b>                                                                                                         | <b>2400.00</b>             | 2400.00                                    | 12000.00        | 4800.00                   |
| STD 6                  | 1200.00                                                                                                                | 1200.00                    | 1200.00                                    | 6000.00         | 2400.00                   |
| STD 5                  | 600.00                                                                                                                 | 600.00                     | 600.00                                     | 3000.00         | 1200.00                   |
| STD 4                  | 300.00                                                                                                                 | 300.00                     | 300.00                                     | 1500.00         | 600.00                    |
| STD 3                  | 150.00                                                                                                                 | 150.00                     | 150.00                                     | 750.00          | 300.00                    |
| <b>STD 2 (LLOQ2)</b>   | <b>75.00</b>                                                                                                           | 75.00                      | <b>75.00</b>                               | 375.00          | <b>150.00</b>             |
| <b>STD 1 (LLOQ1)</b>   | <b>37.50</b>                                                                                                           | <b>37.50</b>               | 37.50 <sup>d</sup>                         | <b>187.50</b>   | 75.00 <sup>d</sup>        |
| STD 0                  | 0.00                                                                                                                   | 0.00                       | 0.00                                       | 0.00            | 0.00                      |
| <b>QCs ID</b>          |                                                                                                                        |                            |                                            |                 |                           |
| QC3                    | <b>3200.00</b>                                                                                                         | 3200.00                    | <b>3200.00</b>                             | <b>16000.00</b> | <b>6400.00</b>            |
| QC3A                   | 1600.00                                                                                                                | <b>1600.00</b>             | 1600.00                                    | 8000.00         | 3200.00                   |
| QC2                    | <b>1000.00</b>                                                                                                         | <b>1000.00<sup>a</sup></b> | <b>1000.00</b>                             | <b>5000.00</b>  | <b>2000.00</b>            |
| QC1                    | 200.00                                                                                                                 | 200.00                     | <b>200.00</b>                              | 1000.00         | <b>400.00<sup>c</sup></b> |
| QC1A                   | <b>100.00</b>                                                                                                          | <b>100.00</b>              | 100.00                                     | <b>500.00</b>   | 200.00                    |
| LLOQ Threshold (pg/mL) |                                                                                                                        |                            |                                            |                 |                           |
| ULOQ Threshold (pg/mL) |                                                                                                                        |                            |                                            |                 |                           |

b) Should not be included in the standard curve setting for MCP-1.

c) For IL-4, LLOQ set at 75.00 and 150.00 pg/mL and QC1A set at 200.00 pg/mL failed to meet the acceptance criteria, for study samples analysis, range of the curve will be 150.00 to 12000.00 pg/mL but all samples <400.00 pg/mL will have to be reported as <LLOQ (LLOQ= 400.0 pg/mL).

d) Accessory standard

**Appendix 11**  
**Appendix 3****Assay Instructions Sheet**

Study/Reference No.: \_\_\_\_\_

e) Out of the range requested by the validation Study plan, refer to note added in section 6.2.2 Preparation of standards and QCs

f) For GM-CSF, if selected as a Single plex, low QC1 and LLOQ should be increased as failure of the low QC during the precision and relative accuracy assessment was high compared to the other cytokines.  
Bold concentrations reflect the appropriate levels for each cytokine (LLOQ, ULOQ and QCs)

Table 3 List of cytokines to be analyzed

|                                         |                                        |
|-----------------------------------------|----------------------------------------|
| IL-1 $\beta$ <input type="checkbox"/>   | IL-15 <input type="checkbox"/>         |
| IL-1RA <input type="checkbox"/>         | IL-17A <input type="checkbox"/>        |
| IL-2 <input type="checkbox"/>           | IL-18 <input type="checkbox"/>         |
| IL-4 <input type="checkbox"/>           | IFN- $\gamma$ <input type="checkbox"/> |
| IL-5 <input type="checkbox"/>           | TNF- $\alpha$ <input type="checkbox"/> |
| IL-6 <input type="checkbox"/>           | MCP-1 <input type="checkbox"/>         |
| IL-8 <input type="checkbox"/>           | MIP-1 $\beta$ <input type="checkbox"/> |
| IL-10 <input type="checkbox"/>          | G-CSF <input type="checkbox"/>         |
| IL-12/23 (p40) <input type="checkbox"/> | GM-CSF <input type="checkbox"/>        |
| IL-13 <input type="checkbox"/>          |                                        |

- Assay should be performed using the automatic plate washer (Appendix #2a) ☐ or manual handheld magnetic washer (Appendix #2b) ☐

Comments: \_\_\_\_\_  
\_\_\_\_\_  
\_\_\_\_\_

Verified by/date: \_\_\_\_\_

Reviewed by/date: \_\_\_\_\_

Sponsor Reference No. UTSW-Gray-SPG50-004

Test Facility Study No. 5550014

## Appendix 11

## Appendix 3

Study/Reference no/Assay ID: \_\_\_\_\_

Cytokine Multiplex Spiking Sheet Preparation of tQC

| Target Concentration (pg/mL) |                                                                                                                            |              |          | Stock Concentration (pg/mL) |                                                                                                                            |              |          | 2-fold diluted Lot # XXXXXX <sup>a</sup> |             |               |             | Calculated Concentration (pg/mL) |             |               |                                                                                                                            |              |          |
|------------------------------|----------------------------------------------------------------------------------------------------------------------------|--------------|----------|-----------------------------|----------------------------------------------------------------------------------------------------------------------------|--------------|----------|------------------------------------------|-------------|---------------|-------------|----------------------------------|-------------|---------------|----------------------------------------------------------------------------------------------------------------------------|--------------|----------|
| Sample Identification        | IL-1β, IL-1RA, IL-6, IL-12/23 (p40), IL-15, TNF-α, IFN-γ, G-CSF, MCP-1, MIP-1β, GM-CSF, IL-2, IL-5, IL-8, IL-13 and IL-17A | IL-10, IL-18 | IL-4     | Stock Identification        | IL-1β, IL-1RA, IL-6, IL-12/23 (p40), IL-15, TNF-α, IFN-γ, G-CSF, MCP-1, MIP-1β, GM-CSF, IL-2, IL-5, IL-8, IL-13 and IL-17A | IL-10, IL-18 | IL-4     | Total Volume (μL)                        | Stock       |               | Volume (μL) | Performed (✓)                    | Volume (μL) | Performed (✓) | IL-1β, IL-1RA, IL-6, IL-12/23 (p40), IL-15, TNF-α, IFN-γ, G-CSF, MCP-1, MIP-1β, GM-CSF, IL-2, IL-5, IL-8, IL-13 and IL-17A | IL-10, IL-18 | IL-4     |
|                              |                                                                                                                            |              |          |                             |                                                                                                                            |              |          |                                          | Volume (μL) | Performed (✓) |             |                                  |             |               |                                                                                                                            |              |          |
| Stock <sup>b</sup>           | 10000.00                                                                                                                   | 50000.00     | 20000.00 | Stock b                     | 10000.00                                                                                                                   | 50000.00     | 20000.00 | N/Ap                                     | N/Ap        | N/Ap          | N/Ap        | N/Ap                             | N/Ap        | N/Ap          | 10000.00                                                                                                                   | 50000.00     | 20000.00 |
| QC Stock                     | 2500.00                                                                                                                    | 12500.00     | 5000.00  | Stock b                     | 10000.00                                                                                                                   | 50000.00     | 20000.00 | 200                                      | 50          | ( )           | 150         | ( )                              | 2500.00     | 12500.00      | 5000.00                                                                                                                    |              |          |
| tQC                          | 1250.00                                                                                                                    | 6250.00      | 2500.00  | QC Stock                    | 2500.00                                                                                                                    | 12500.00     | 5000.00  | 350                                      | 175         | ( )           | 175         | ( )                              | 1250.00     | 6250.00       | 2500.00                                                                                                                    |              |          |

Comments: a= Refer to dilution sheet for the preparation of the 2-fold dilution.  
b= Refer to Appendix #1

Verified by/ date: \_\_\_\_\_ Spiking performed by/ date: \_\_\_\_\_  
 Calculations verified by/ date: \_\_\_\_\_ Reviewed by/ date: \_\_\_\_\_

Appendix 6 (AP.BMK.mkpCyt.12)

Test Facility Study No. 5550014

Sponsor Reference No. UTSW-Gray-SPG50-004

## Appendix 11

## Appendix 3

## Sample Analysis Instruction Sheet

Study/Reference no: \_\_\_\_\_

Assay ID: \_\_\_\_\_

[illegible]

✓ = To be analyzed

Comment(s): \_\_\_\_\_

Verified by / Date: \_\_\_\_\_

Time: \_\_\_\_\_

Reviewed by / Date : \_\_\_\_\_

**Appendix 11**  
**Appendix 4**
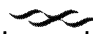
  
charles river

|                                                                                                                                     |                                 |                                    |
|-------------------------------------------------------------------------------------------------------------------------------------|---------------------------------|------------------------------------|
| Title:<br><b>QUANTITATION OF IP-10 (CXCL10) IN<br/>CYNOMOLGUS MONKEY PLASMA BY AN ENZYME<br/>LINKED IMMUNOSORBENT ASSAY (ELISA)</b> | AP Number:<br>AP.BMK.mkpIP10.09 | Effective Date:<br>Signature of AP |
|                                                                                                                                     | CR SEN/SHB                      | Supersedes:<br>30 Jun 2021         |
| Approved by:<br>Marie-Eve Rodrigue<br>Senior Research Scientist I, Biomarkers                                                       | <i>merodugue</i>                | Date:<br><i>05 Aug 2021</i>        |
| Verified by:<br>Sonia Ménard<br>Research Scientist II, Biomarkers                                                                   | <i>Sonia</i>                    | Date:<br><i>05 Aug 2021</i>        |
| Authorized by:<br>Julie Fontaine<br>Senior Research Scientist I, Biomarkers                                                         | <i>Julie Fontaine</i>           | Date:<br><i>05 Aug 2021</i>        |

**1.0 Purpose**

The purpose of this assay is to determine the concentration of IP-10 (or alternately known as CXCL10) in Cynomolgus monkey plasma by ELISA.

**2.0 Scope**

This procedure applies to IP-10 in Cynomolgus plasma assays undertaken in the Biomarkers department

**3.0 Responsibilities**

All staff performing this assay are responsible for compliance with this analytical procedure.

**4.0 Required forms**

Appendix #1: Plasma IP-10 ELISA Assay sheet

Appendix #2: Plasma IP-10 ELISA Spiking Sheet (Kit Standard) (*Example of spreadsheet*)

Appendix #3: IP-10 in Monkey Plasma Assay Instructions (*Example of document*)

Appendix #4: Plasma IP-10 ELISA Spiking Sheet (Monkey Reference Standard)(*Example of spreadsheet*)

**Appendix 11**  
**Appendix 4**

|                              |                                 |                            |
|------------------------------|---------------------------------|----------------------------|
| AP Number: AP.BMK.mkpIP10.09 | Effective Date: Signature of AP | Supersedes:<br>30 Jun 2021 |
|------------------------------|---------------------------------|----------------------------|

**5.0 Materials/Equipment/Reagents****Notes:**

- *The procedure may require other general laboratory supplies commonly used in laboratory science. Materials can be substituted (with the exception of the kit components or the monkey reference standard) provided the same specifications are met.*
- *If the lot # of a reagent is recorded, the recording of the inventory # is not critical, since it is considered to be for information or reference purposes only. The only situation that would make the inventory # critical is for reagents that have an expiry date based on the receipt date.*

**5.1 Materials/Equipment****5.1.1 Non Disposable/Instrumentation**

Repeater pipette  
Pipettes (multi-channel, micro)  
Vortex mixer  
Spectrophotometer plate reader  
SOFTmax PRO GxP software  
Watson Laboratory Information Management System (LIMS)  
Analytical balance

**5.1.2 Disposable**

Aluminum foil  
Tubes (polypropylene, various caps, various size)  
Ultra pure water (UPW)  
Pipette tips (various size)  
Non-sterile solution basins  
Parafilm  
Eppendorf combitips (various capacity)  
Absorbent paper  
Auto-sticker plate sealers  
96 wells plate, U-bottom, polypropylene (used for pre-loading)  
0.2 or 0.22  $\mu$ m filters

**5.2 Kit Components****Notes:**

- Concentrations of kit components/ reagents may vary from lot to lot.
- When possible, the same kit/Monkey Reference Standard lot should be used for the entire study to reduce any potential assay variability due to change of lot. Any new kit lot should be qualified as per S.O.P. BMK-004 prior to use. In the event where the same lot of kit cannot be used throughout the study and lot to lot variability is present, this should be considered in the interpretation of the results.
- All kit reagents should be stored in a refrigerator set to maintain 4°C.

**Appendix 11**  
**Appendix 4**

|                              |                                 |                            |
|------------------------------|---------------------------------|----------------------------|
| AP Number: AP.BMK.mkpIP10.09 | Effective Date: Signature of AP | Supersedes:<br>30 Jun 2021 |
|------------------------------|---------------------------------|----------------------------|

**Quantikine Human CXCL10/IP-10, cat # SIP100 (R&D Systems)**

- IP-10 Microplate, 6 units (Part 890834)
- IP-10 conjugate, (Part 890835), 6 x 21 mL
- IP-10 standard: To be reconstituted at 5000 pg/mL, (Part 890836), 6 vials
- Assay diluent RD1-56, (Part 895102), 6 x 17 mL
- Calibrator diluent RD5K, (Part 895119), 6 x 21 mL (**Do not use**)
- Calibrator diluent RD6Q, (Part 895128), 6 x 21 mL
- Wash buffer concentrate 25X, (Part 895003), 6 x 21 mL (**Do not use**)
- Color reagent A, (part 895000), 6 x 12.5 mL
- Color reagent B, (part 895001), 6 x 12.5 mL
- Stop solution (2N Sulfuric acid), (part 895032), 6 x 6 mL

Note: Catalog number SIP100 contains the equivalent of 6 kits. This catalog number can be substituted by DIP100 (1 kit) or PDIP100 (50 kits). Note that when PDIP100 is used, the IP-10 standard should be used for more than one assay.

**5.3 Monkey Reference Standard**

| Reagents                              | Supplier  | Catalogue # |
|---------------------------------------|-----------|-------------|
| Recombinant rRhIP-10/<br>CXCL10 (5µg) | Bio Basic | RC322-21    |

**5.4 Other reagents**

| Reagents                          | Supplier | Catalogue # |
|-----------------------------------|----------|-------------|
| TBS-Tween buffer pouches (pH 8.0) | Sigma    | T9039       |
| 1X PBS, pH 7.2                    | Gibco    | 20012       |
| Bovine serum albumin (BSA)        | Sigma    | A6003       |

**5.5 Endogenous Matrix (used to prepare trending QC)**

Identity: Cynomolgus monkey plasma  
 Anticoagulant: EDTA  
 Storage: In a freezer set to maintain -20°C or -80°C  
 Expiry Date: SIP (stability in progress)

**6.0 Preparation of Assay Reagents****Notes:**

- i. Volumes described for any preparation may be scaled up or down proportionally as long as the target concentration is not changed. All changes must be documented in raw data.
- ii. Bring all reagents to ambient RT before use.
- iii. Complete Appendix #1, #2 or #4 of this AP or Appendix #1 or #2 of SOP CACI-001 whichever is applicable, for each solution preparation.

**Appendix 11**  
**Appendix 4**

|                              |                                 |                            |
|------------------------------|---------------------------------|----------------------------|
| AP Number: AP.BMK.mkpIP10.09 | Effective Date: Signature of AP | Supersedes:<br>30 Jun 2021 |
|------------------------------|---------------------------------|----------------------------|

6.1 Preparation of IP-10 Standards and Quality Control (QC) Samples

**Note: Standard curve should be prepared by using the monkey reference standard (Bio Basic Cat# RC322-21). However, the Human IP-10 standard provided in the kit can also be used. The Standard to be used will be documented on Appendix #3.**

- 6.1.1 Reconstitution of Recombinant rRhIP-10/CXCL10 Standard (code: rRhIP-10 STD) using the monkey reference standard
- Once thawed, quick spin the original vial of Recombinant rRhIP-10/CXCL10 (5µg) to allow the content to be at the bottom of the vial.
  - Reconstitute 1 Recombinant rRhIP-10/CXCL10 vial (from Bio Basic) at a final concentration of 10 µg/mL (add 500 µL of 0.1%BSA to a vial of 5 µg of Recombinant rRhIP-10/CXCL10) at ambient RT.
  - Aliquot the solution (recommended volume 20 µL per aliquot) into appropriately labeled microtubes and store in a freezer set to maintain -80°C with SIP as the expiry date.
  - Record preparation on Appendix #4.
- 6.1.2 Preparation of IP-10 Stock (code: mkpIP10-Std) using the Human IP-10 standard from the Kit  
(reconstituted at 5000.00 pg/mL)
- Please refer to Appendix #2 for the preparation of IP-10 Stock
  - Add UPW (refer to the vial label for the volume) to the lyophilized vial IP-10 standard. Mix by repeated inversion.
  - Incubate the vial for at least 15 minutes (but no more than 30 minutes) at ambient RT to allow proper reconstitution. Prepare the STD curve and quality control (QC) samples immediately after the end of reconstitution.
  - Leftover reconstituted IP-10 Stock may be aliquoted (as per instructions given on Appendix #3) immediately after the end of reconstitution and stored in a freezer set to maintain -20°C for up to 1 month. Discard if remaining volume not needed or insufficient for subsequent assays.
  - On instances when a frozen aliquot is used to prepare the STD curve and QCs, it should be thawed immediately prior to use.

6.1.3 Preparation of Standard (STD) and QC samplesNotes:

- i. Refer to Appendix #2 or Appendix #4, as applicable, for the preparation of standards and QC samples
- ii. Standards and QCs are prepared at ambient RT on the day of the assay.
- iii. Refer to BMK-004 for target QC concentration ranges.

6.2 Preparation of solutions

- 6.2.1 IP-10 Wash Buffer (1X TBS/ 0.05% Tween-20, pH 8.0) (code:mkpIP10-WB)
- Dissolve one TBS-Tween buffer pouch into 1L of UPW.
  - Mix well.
  - Store at ambient RT for a maximum of 1 month.

## Appendix 11

### Appendix 4

|                              |                                 |                            |
|------------------------------|---------------------------------|----------------------------|
| AP Number: AP.BMK.mkpIP10.09 | Effective Date: Signature of AP | Supersedes:<br>30 Jun 2021 |
|------------------------------|---------------------------------|----------------------------|

#### 6.2.2 Substrate Solution IP-10 (code: **SS mkpIP-10**)

- Mix 11.5 mL of Color Reagent A and B (equal volumes) to an appropriate container.
- Protect this solution from light with aluminium foil.
- Mix by repeated inversion.
- Expiration: **To be used within 15 minutes of preparation.**

#### 6.2.3 PBS/0.1% BSA (code: 0.1%BSA)

- In an appropriate container, add 0.50g of BSA to 500 mL of 1X PBS pH 7.2.
- Mix thoroughly until completely dissolved.
- Filter using a 0.2 or 0.22 µm filter system.
- Store in a refrigerator set to maintain 4°C for up to 2 weeks.

### 7.0 Preparation of trending QC (tQC)

The tQC will be prepared with a monkey plasma lot neat or diluted up to 256-fold in Calibrator diluent RD6Q. Refer to BMK-004 for preparation details.

- Aliquot the chosen lot(s) neat into appropriately labelled polypropylene tubes and store in a freezer set to maintain -20°C or -80°C. The expiry date on the label of the neat matrix should be SIP.
- Stability of the tQC sample(s) will be monitored and deemed acceptable based on the assay performance when analyzed using a qualified lot of kit.
- tQC is prepared on the day of the assay at ambient RT.

### 8.0 Validation Table

| Parameter                                              | Results                                                                             | Based on Validation Study # |
|--------------------------------------------------------|-------------------------------------------------------------------------------------|-----------------------------|
| Validated range using the Monkey Reference Standard*   | LLOQ = 9.38 pg/mL<br>ULOQ = 600.00 pg/mL                                            | 3800698                     |
| Validated range using the kit Human Reference Standard | LLOQ = 30.00 pg/mL<br>ULOQ = 750.00 pg/mL                                           |                             |
| Dilution using the Monkey Reference Standard*          | Samples may be analyzed neat or diluted up to 8-Fold with Calibrator Diluent RD6Q   |                             |
| Dilution using the kit Human Reference Standard        | Samples may be analyzed neat or diluted up to 256-Fold with Calibrator Diluent RD6Q |                             |
| Short term matrix stability                            | 26 hours and 26 minutes at ambient RT and in a refrigerator set to maintain 4°C     |                             |

**Appendix 11**  
**Appendix 4**

|                              |                                 |                            |
|------------------------------|---------------------------------|----------------------------|
| AP Number: AP.BMK.mkpIP10.09 | Effective Date: Signature of AP | Supersedes:<br>30 Jun 2021 |
|------------------------------|---------------------------------|----------------------------|

|                                                                                                                                                                                                           |                                                                   |  |
|-----------------------------------------------------------------------------------------------------------------------------------------------------------------------------------------------------------|-------------------------------------------------------------------|--|
| <b>Long term matrix stability</b>                                                                                                                                                                         | <b>203 days in freezers set to maintain -20°C and -80°C</b>       |  |
| <b>Freeze-thaw matrix stability</b>                                                                                                                                                                       | 4 Freeze/thaw cycles in freezers set to maintain -20°C and -80°C. |  |
| *A standard curve using the monkey reference standard should be used in priority. However, the human reference standard from the kit can also be used with the validated range and dilution listed above. |                                                                   |  |

**9.0**    **Procedure****9.1**    **ELISA Procedure**

## Notes:

- i. Assay reagents and samples should be brought to ambient RT before starting the assay.
- ii. Standards, QCs (QC1, QC2, QC3 and tQC, one set before and one set after the study samples) and study samples should be analyzed in duplicate. (Please note that for qualification purposes, QCs can be loaded n=3).
- iii. Study samples should be analyzed in batches so that samples from each group and sex (if applicable) are represented in a single assay (unless otherwise stated in advance prior to analysis). This will not be applicable to repeat analysis.
- iv. On the first occasion, samples should be analyzed diluted 3-fold (when using the monkey reference standard) and 2-fold when using the human standard from the kit, unless different levels of IP-10 are expected.
- v. Samples should be transported from Sample Management on dry ice and thawed at ambient RT. Record in-process sample storage on Appendix #1.
- vi. Pipettes used for the assay procedure, preparation of standards and QCs and daily solutions will be recorded on Appendix # 1. Pipettes for dilution of study samples will be recorded on the dilution sheet or on Appendix #1 (both are appropriate).
- vii. Please note that for the manual washing step only, multi-channel pipette can be used beyond the calibrated range as the exact volume is not critical for the washing of the assay plate.
- viii. Please refer to Appendix #1 for the assay procedure.

**Appendix 11**  
**Appendix 4**

|                              |                                 |                            |
|------------------------------|---------------------------------|----------------------------|
| AP Number: AP.BMK.mkpIP10.09 | Effective Date: Signature of AP | Supersedes:<br>30 Jun 2021 |
|------------------------------|---------------------------------|----------------------------|

**10.0 Calculation of Data**

Data capture of the output from the plate reader is performed using SOFTmax PRO GxP software. The blank is not subtracted in SOFTmax PRO.

| SoftMax Pro GxP Settings   |                                      |                                                                                   |
|----------------------------|--------------------------------------|-----------------------------------------------------------------------------------|
| Settings                   | Display                              | Options                                                                           |
| Wavelength                 | Endpoint<br>Lm1 450 nm<br>Lm2 540 nm | Wavelength:<br>Lm1: 450 nm<br>Lm2: 540 nm                                         |
| PathCheck                  | N/Ap                                 | Off                                                                               |
| Automix & blanking         | Automix: Off                         | Before First Read should be unchecked<br>Pre-Read Plate should be unchecked       |
| Auto Calibrate             | On or Once                           | AutoCalibrate should be ticked                                                    |
| Column Wavelength Priority | Column Priority                      | Select column priority                                                            |
| Assay Plate Type           | N/Ap                                 | 96 Well Standard clrbtm                                                           |
| Wells to Read              | N/Ap                                 | Read entire plate                                                                 |
| Carriage Speed             | C.Speed:<br>Normal                   | Select Normal                                                                     |
| AutoRead                   | N/Ap                                 | AutoRead should be unchecked                                                      |
| Speed Read                 | N/Ap                                 | Speed read should be unchecked                                                    |
| $\Sigma$ Reduction         |                                      |                                                                                   |
| $\Sigma$ Reduction         | Wavelength Combination:<br>!Lm1-!Lm2 | Select: !Lm1-!Lm2<br>Data Mode: Absorbance<br>Use plate blank should be unchecked |
| $\Sigma$ Reduction         |                                      |                                                                                   |
| Raw / $\Sigma$ Reduction   | N/Ap                                 | Select $\Sigma$ Reduced                                                           |

Data will be reduced using LIMS. NSB/Standard 0 (0.00 pg/mL) should not be included as a calibrator of the standard curve. The assay should first be setup with these settings: Assay Type should be ELISA and the Instrument Type and Instrument Interface should be Softmax Pro (Reduced Data). The individual ODs of each standard are used to fit the standard curve using the following parameters:

**Appendix 11**  
**Appendix 4**

|                              |                                 |                            |
|------------------------------|---------------------------------|----------------------------|
| AP Number: AP.BMK.mkpIP10.09 | Effective Date: Signature of AP | Supersedes:<br>30 Jun 2021 |
|------------------------------|---------------------------------|----------------------------|

## Watson Master Assay settings:

|                            |                                                                                                                          |
|----------------------------|--------------------------------------------------------------------------------------------------------------------------|
| Analyte ID: mkpIP10        |                                                                                                                          |
| <b>Details</b>             |                                                                                                                          |
| Reduction type             | Logistic (Auto Estimate)                                                                                                 |
| Configuring Standards      | Mean of replicate raw data should be unchecked                                                                           |
| Configuring QCs            | Mean of replicate raw data should be unchecked<br>Number of serial dilutions to use should be 2<br>Select mean concs     |
| Configuring others         | Mean of replicate raw data should be unchecked<br>Number of serial dilutions to use should be 2<br>Select mean concs     |
| <b>Analyte Info</b>        |                                                                                                                          |
| Concentration units        | pg/mL                                                                                                                    |
| Weighting Factor           | 1/Y                                                                                                                      |
| Decimal Places             | 6                                                                                                                        |
| Regression Type            | Logistic (Auto Estimate)                                                                                                 |
| <b>Titer-Plate Mapping</b> |                                                                                                                          |
| Titer-Plate Details        | Number of plate per Analytical Run should be 1.<br>STD 0 (0.00 pg/mL) should be loaded as NSB.<br>NSB should be ignored. |

**11.0 Assay Acceptance Criteria****11.1 Blank Evaluation**

| <b>Blank (STD 0) Evaluation</b>               | <b>Action to take</b>                                                                       |
|-----------------------------------------------|---------------------------------------------------------------------------------------------|
| Both Blank wells OD < Mean OD of LLOQ         | No action to be taken                                                                       |
| One of the 2 Blank wells OD > Mean OD of LLOQ | Investigation to be provided to discuss the impact on the Data (Accept or Reject the assay) |
| Both Blank wells OD > Mean OD of LLOQ         |                                                                                             |

**11.2 Calibration Curve**

- The mean back-calculated values for all working calibrators should be within  $\pm 25\%$  of their theoretical values).
- A maximum of i) two full points, or ii) one full point and two partial points, or iii) three partial points can be masked from a STD curve with 8 or more working STDs. Two consecutive STD levels cannot be fully masked.

**Appendix 11**  
**Appendix 4**

|                              |                                 |                            |
|------------------------------|---------------------------------|----------------------------|
| AP Number: AP.BMK.mkpIP10.09 | Effective Date: Signature of AP | Supersedes:<br>30 Jun 2021 |
|------------------------------|---------------------------------|----------------------------|

- A maximum of i) one full point and one partial point, or ii) two partial points can be masked from a STD curve with 7 working STDs.
- A maximum of two partial points will be masked from a STD curve with 6 working STDs.
- This does not apply to the accessory standard, which is an additional standard with a concentration below the LLOQ to help define the curve at the lower end. If the accessory standard has a negative impact on the overall back-calculation of the individual standards, it can be partially masked.
- If the standard curve fails to meet the acceptance criteria, the partial deletion of standard that meet acceptance criteria may be performed if it allows the improvement of the curve fit and remaining standards.
- The curve must contain at least 6 working standards following deletion of standards.
- If the LLOQ and/or the ULOQ are removed, then the next lowest and/or next highest working calibrator becomes the new LLOQ and ULOQ, respectively. Any sample measured as greater than the new ULOQ or as below the new LLOQ should be repeated.

**11.3 Quality Controls (QCs in Calibrator Diluent RD6Q and tQC)**

- Mean back calculated concentrations should be within 75% - 125% of their theoretical concentrations and the % difference should be within  $\pm 25\%$ .

**11.4 Run Acceptance Criteria**

- A run is accepted if the calibration standard curve meets the acceptance criteria mentioned in section 11.2 and if at least 67% of the QC samples meet the acceptance criteria mentioned in section 11.3, with at least 50% of the QCs (QC1 to 3 and tQC samples) accepted at each level.

**11.5 Acceptance Criteria for Study Samples**

- The % difference between singlicate values should be within  $\pm 25\%$ . A sample should be repeated if this criteria is not met.
- Watson cannot calculate the % difference between singlicates if one singlicate is within the curve range, and the other singlicate is <LLOQ or >ULOQ. Therefore, LLOQ and ULOQ thresholds have been defined, that represent 25.4% difference with the LLOQ and ULOQ, respectively. If one singlicate is outside the curve range and the other singlicate is  $\geq$  LLOQ threshold or  $\leq$  ULOQ threshold, the sample should be repeated. If the quantifiable singlicate is  $\leq$  LLOQ threshold (when analysed neat) or  $\geq$  ULOQ threshold (at the highest dilution factor), the quantifiable singlicate is reported. Refer to Appendix #3 for the LLOQ and ULOQ threshold concentrations.
- "< Y" (where y is the assay LLOQ concentration multiplied by the dilution factor at which the sample was analyzed, if applicable) will be reported for study samples with concentrations below the LLOQ. The value of the LLOQ should be recorded in the footnote of the report table.
- "Y/2" will be used for the calculation of the mean and standard deviation (SD) for values for which the measured concentration was <LLOQ, and will be mentioned as a footnote as well.
- Any samples with concentration > ULOQ should be diluted up to 256-fold with Calibrator diluent RD6Q and re-analyzed. The final reported value should be observed

**Appendix 11**  
**Appendix 4**

|                              |                                 |                            |
|------------------------------|---------------------------------|----------------------------|
| AP Number: AP.BMK.mkpIP10.09 | Effective Date: Signature of AP | Supersedes:<br>30 Jun 2021 |
|------------------------------|---------------------------------|----------------------------|

- concentration multiplied by the dilution factor.
- In the event where the study sample may not be re-analyzed at a higher dilution factor due to validation or volume limitation, ">X" (where X is the assay ULOQ concentration multiplied by the dilution factor at which the sample was analyzed) will be reported. "X" will be used for the calculation of the mean and SD, and will be mentioned as a footnote as well.

**11.6 Reported Results**

- Results, group mean and SD will be reported in pg/mL with two decimal places. Percentages will be reported at one decimal place. Due to a software limitation, all means and SDs will be reported to 1 more decimal place and percentages will be reported with no decimal places when generated by the SRS software.
- The upper limit of the normal range of concentrations will be defined as:  
The overall baseline mean (predose/pretreatment values for all animals\* in all groups)\*\* + 2 standard deviations.
- Fold change will be reported as:  
The ratio of the measured IP-10 concentration/upper limit of the normal range of concentrations.  
The fold change should be calculated for each sample
- Incidence of IP-10 elevations will be reported:  
The number of individual animals\* per group with a fold change  $\geq 1.1$ -fold.

\*Calculations will be done separately for females and males.

\*\*If predose values are not available, values from all animals of the non-treated group(s) will be used to generate the overall baseline mean.

Based on the nature of the study or specific sponsor requirement the upper limit of the normal range of concentrations, fold change and/or incidence might be calculated differently, and should be documented in appropriate study plans.

**12.0 Revision History**

| Version | Date        | Reason For Revision                                                                                                                                                                                                                                                                                                                                                      |
|---------|-------------|--------------------------------------------------------------------------------------------------------------------------------------------------------------------------------------------------------------------------------------------------------------------------------------------------------------------------------------------------------------------------|
| 1       | 07-Oct-2016 | New AP.                                                                                                                                                                                                                                                                                                                                                                  |
| 2       | 17-Mar-2017 | - Charles River logo was updated and dash removed from abbreviated name.<br>- Wording in section 6.1.2 for QC preparation was updated to reference SOP BMK-004.<br>- Section 10.5 was added to include definition for upper limit of the normal concentration range and to provide instructions on how to report incidence of IP-10 elevation and calculate fold change. |
| 3       | 01-May-2017 | -Section 6.1.1 Add the possibility of aliquoting and storing the IP-10 stock to account for differences in packaging of the kits. (Appendix #2                                                                                                                                                                                                                           |

**Appendix 11**  
**Appendix 4**

|                              |                                 |                            |
|------------------------------|---------------------------------|----------------------------|
| AP Number: AP.BMK.mkpIP10.09 | Effective Date: Signature of AP | Supersedes:<br>30 Jun 2021 |
|------------------------------|---------------------------------|----------------------------|

|   |             |                                                                                                                                                                                                                                                                                                                                                                                                                                                                                                                                                                                                                                                                                                                                                                                                                                                                                                                                                                             |
|---|-------------|-----------------------------------------------------------------------------------------------------------------------------------------------------------------------------------------------------------------------------------------------------------------------------------------------------------------------------------------------------------------------------------------------------------------------------------------------------------------------------------------------------------------------------------------------------------------------------------------------------------------------------------------------------------------------------------------------------------------------------------------------------------------------------------------------------------------------------------------------------------------------------------------------------------------------------------------------------------------------------|
|   |             | was modified accordingly, details below).<br>This change was recommended by the kit manufacturer based on the stability of the IP-10 standard stock, and thus has no impact.<br>-Minor formatting in Appendices #1 and #2.                                                                                                                                                                                                                                                                                                                                                                                                                                                                                                                                                                                                                                                                                                                                                  |
| 4 | 22-Jun-2017 | <b>Appendix #1:</b><br>-Add a step to bring assay reagents to RT before starting the assay in accordance with other APs<br>-reduce the volumes for manual washes to 350 µL<br>-add a prompt to record the expiry date of UPW on the reagents/working solutions table.<br><b>Appendix #2:</b><br><u>Standard stock information:</u><br>-Moved the prompt to record the batch ID of the reconstituted standard from Table 2 to "Standard Stock" section.<br>-Changed the wording: Aliquot expiry date to batch expiry date;<br>-"Not needed" was changed to "N/Ap"<br><b>Table 2:</b><br>-Modified to enter a generic name for the Stock used to prepare the STD 8 and QC3 instead of a prompt to record the batch ID.                                                                                                                                                                                                                                                        |
| 5 | 11-Aug-2017 | <b>Section 6.1.1:</b> Volume of aliquots was changed to be left undefined, based on possible differences in provided volumes.<br><b>Qualification box:</b> maximum dilution was updated to 512-fold based on recent qualification assays.<br><b>Appendix 1:</b> Clarifications were added to the procedure.                                                                                                                                                                                                                                                                                                                                                                                                                                                                                                                                                                                                                                                                 |
| 6 | 04-Jun-2018 | <b>Section 1.0:</b> Modified to remove the statement that the AP should only be used to support non-GLP work. Method has been validated and the AP can now support GLP work.<br><b>Section 7.0:</b> Modified to add the possibility to store the tQC in a freezer set to maintain -20°C.<br><b>Validation box:</b><br>Validation study number was added to replace the non-GLP qualification study number in the previous AP version.<br>ULOQ was changed from 1000.00 to 750.00 pg/mL<br>Dilution range was updated.<br>Stability results were added.<br><b>Section 9.0:</b> Watson Master Assay Settings were modified to add the SEND terminology.<br><b>Section 10.1:</b> Acceptance criteria of the standard curve were updated to reflect the new 6-point curve (previously 7-point) and the change in acceptance criteria of LLOQ and ULOQ (previously ±30% of theoretical, decreased to ±25%).<br><b>Section 10.2:</b> Acceptance criteria of the QCs were modified |

**Appendix 11**  
**Appendix 4**

|                              |                                 |                            |
|------------------------------|---------------------------------|----------------------------|
| AP Number: AP.BMK.mkpIP10.09 | Effective Date: Signature of AP | Supersedes:<br>30 Jun 2021 |
|------------------------------|---------------------------------|----------------------------|

|   |             |                                                                                                                                                                                                                                                                                                                                                                                                                                                                                                                                                                                                                                                                                                                                                                                                                                                                                                                                                     |
|---|-------------|-----------------------------------------------------------------------------------------------------------------------------------------------------------------------------------------------------------------------------------------------------------------------------------------------------------------------------------------------------------------------------------------------------------------------------------------------------------------------------------------------------------------------------------------------------------------------------------------------------------------------------------------------------------------------------------------------------------------------------------------------------------------------------------------------------------------------------------------------------------------------------------------------------------------------------------------------------|
|   |             | <p>(previously <math>\pm 30\%</math> of theoretical and 30% difference between singlicates, decreased to <math>\pm 25\%</math> theoretical and <math>\pm 25\%</math> difference between singlicates).</p> <p><b>Section 10.4:</b><br/>The maximum dilution was updated in the acceptance criteria. Modified to add a ULOQ threshold.</p> <p><b>Appendix #1:</b><br/>Suggested volume of pre-load was decreased from 200 to 180 <math>\mu\text{L}</math>.<br/>Data review section modified to reflect the change in acceptance criteria of the curve and QCs (section 10.1 and 10.2 of AP)<br/>Minor formatting of the tables was performed.</p> <p><b>Appendix #2:</b><br/>Minor formatting changes.</p> <p><b>Appendix #3:</b><br/>Standard curve and QC details were removed, since the curve range is stated in the AP, and the actual standards and concentrations are stated on Appendix #2.<br/>Minor formatting changes of the appendix.</p> |
| 7 | 11-Jan 2019 | <p><b>Section 5.4:</b> The name of Bioreclamation as a supplier for monkey plasma was changed to BioIVT, and "other commercial suppliers" was added as a possible source for monkey plasma.</p> <p><b>Validation box:</b> updated to include the results of the long term stability.</p> <p><b>Section 10.5:</b> was modified to update the definition of the incidence of IP-10 elevations and to include reference to study plans in the event where a different definition of fold-change and elevation is used.</p> <p>Minor changes in wording throughout the document, without changes in the procedure.</p>                                                                                                                                                                                                                                                                                                                                  |
| 8 | 30 Jun 2021 | <p>Signature box: to update the signature reasons to reflect ST01-01-31</p> <p>Section 5.1, 5.3, 5.4, 6.1, 6.2 and 7.2, and Appendix #4 were added/updated because a monkey reference standard should be used to prepared the standards and QCs and therefore reagents, and instructions for the preparation of the standard and QC were added.</p> <p>Section 5.5: Suppliers were removed as any supplier is acceptable.</p> <p>Instruction to record lot number in the raw data was removed as recording of raw data is covered by ST01-02-01</p> <p>Section 10.0: To remove the automix from the SoftMaxPro settings, as this was considered a better practice by instrument specialists. This change has no impact as the plate is mixed manually before reading.</p> <p>SoftMax Pro instruction box was updated for clarity with no change to the processes (other than the removal of automix). Other minor</p>                               |

**Appendix 11**  
**Appendix 4**

|                              |                                 |                            |
|------------------------------|---------------------------------|----------------------------|
| AP Number: AP.BMK.mkpIP10.09 | Effective Date: Signature of AP | Supersedes:<br>30 Jun 2021 |
|------------------------------|---------------------------------|----------------------------|

|   |                 |                                                                                                                                                                                                                                                                                                                                                                                                                                                                                                                                                                                                                                                                                                                                                                                                                                                                   |
|---|-----------------|-------------------------------------------------------------------------------------------------------------------------------------------------------------------------------------------------------------------------------------------------------------------------------------------------------------------------------------------------------------------------------------------------------------------------------------------------------------------------------------------------------------------------------------------------------------------------------------------------------------------------------------------------------------------------------------------------------------------------------------------------------------------------------------------------------------------------------------------------------------------|
|   |                 | <p>updates were done to standardize with other APs.</p> <p>Section 11.1 and Appendix #1: Blank evaluation criteria was added.</p> <p>Section 11.2: The reprocessing of the calibration curve with 7 or more working standards added since the curve may have more than 6 working standards. In addition, the outcome if the LLOQ or ULOQ is removed was added.</p> <p>Section 11.3: the % difference formula was removed because it is define in the SOP</p> <p>Appendix #1: Incubation end time replaced by execution time of the washing step because the end time of the incubation correspond to the time the plate is washed.</p> <p>Appendix #3: Addition of the option for the standard to be used in the preparation of the standard curve</p> <p>Minor typos and inconsistencies corrected throughout the document, with no change to the procedure.</p> |
| 9 | Signature of AP | Section 8.0: To correct a typographical error in the validation study number                                                                                                                                                                                                                                                                                                                                                                                                                                                                                                                                                                                                                                                                                                                                                                                      |

# Appendix 11

## Appendix 4

### Plasma IP-10 ELISA Assay Sheet

Study/reference No: \_\_\_\_\_ Assay I.D.: \_\_\_\_\_  
 Page. 1 of 4

| Reagents/ Working Solutions          |                                                       |                             |                                  |                                  |             |                  |
|--------------------------------------|-------------------------------------------------------|-----------------------------|----------------------------------|----------------------------------|-------------|------------------|
| Name                                 | Batch or Lot # (as applicable)                        | Inventory # (if applicable) |                                  |                                  | Expiry Date | Entered by /Date |
|                                      |                                                       | Assay ID:                   | Assay ID:                        | Assay ID:                        |             |                  |
|                                      |                                                       |                             | Or N/Ap <input type="checkbox"/> | Or N/Ap <input type="checkbox"/> |             |                  |
| Human CXCL10/IP-10 kit               |                                                       |                             |                                  |                                  |             |                  |
| IP-10 Microplate                     |                                                       |                             |                                  |                                  |             |                  |
| Assay diluent RD1-56                 |                                                       |                             |                                  |                                  |             |                  |
| IP-10 Conjugate                      |                                                       |                             |                                  |                                  |             |                  |
| Calibrator Diluent RD6Q              |                                                       |                             |                                  |                                  |             |                  |
| Stop solution                        |                                                       |                             |                                  |                                  |             |                  |
| Recombinant rRhIP-10/CXCL10 Standard | rRhIP-10 STD-<br><br>Or N/Ap <input type="checkbox"/> | N/Ap                        |                                  |                                  |             |                  |
| IP-10 Stock (from kit)               | mkpIP10-Std-<br><br>Or N/Ap <input type="checkbox"/>  | N/Ap                        |                                  |                                  |             |                  |
| IP-10 Wash Buffer                    | mkpIP10-WB-                                           | N/Ap                        |                                  |                                  |             |                  |
| UPW                                  |                                                       | N/Ap                        |                                  |                                  |             |                  |

| Working Solutions Preparation Assay ID: _____                                     |                 |      |            |             |                 |                    |
|-----------------------------------------------------------------------------------|-----------------|------|------------|-------------|-----------------|--------------------|
| Batch no                                                                          | Chemical ID     | Lot# | Inventory# | Volume (mL) | Total vol. (mL) | Performed by /Date |
| Preparation of: Substrate Solution IP-10 (code SS mkpIP-10)                       |                 |      |            |             |                 |                    |
| SS mkpIP-10-                                                                      | Color Reagent A |      |            |             |                 |                    |
|                                                                                   | Color Reagent B |      |            |             |                 |                    |
| Time of preparation: _____ (Note: It should be used within 15 min of preparation) |                 |      |            |             |                 |                    |

Appendix #1 (AP.BMK.mkpIP10.09)

## Appendix 11

## Appendix 4

**Plasma IP-10 ELISA Assay Sheet**

Study/reference No: \_\_\_\_\_ Assay I.D.: \_\_\_\_\_  
 Page. \_\_\_\_\_ 2 \_\_\_\_\_ of \_\_\_\_\_ 4 \_\_\_\_\_

| Working Solutions Preparation                                                     |                 | Assay ID: _____ |            | Or N/Ap <input type="checkbox"/> |                 |                    |
|-----------------------------------------------------------------------------------|-----------------|-----------------|------------|----------------------------------|-----------------|--------------------|
| Batch no                                                                          | Chemical ID     | Lot#            | Inventory# | Volume (mL)                      | Total vol. (mL) | Performed by /Date |
| <b>Preparation of: Substrate Solution IP-10 (code SS mkpIP-10)</b>                |                 |                 |            |                                  |                 |                    |
| SS mkpIP-10-                                                                      | Color Reagent A |                 |            |                                  |                 |                    |
|                                                                                   | Color Reagent B |                 |            |                                  |                 |                    |
| Time of preparation: _____ (Note: It should be used within 15 min of preparation) |                 |                 |            |                                  |                 |                    |

| Working Solutions Preparation                                                     |                 | Assay ID: _____ |            | Or N/Ap <input type="checkbox"/> |                 |                    |
|-----------------------------------------------------------------------------------|-----------------|-----------------|------------|----------------------------------|-----------------|--------------------|
| Batch no                                                                          | Chemical ID     | Lot#            | Inventory# | Volume (mL)                      | Total vol. (mL) | Performed by /Date |
| <b>Preparation of: Substrate Solution IP-10 (code SS mkpIP-10)</b>                |                 |                 |            |                                  |                 |                    |
| SS mkpIP-10-                                                                      | Color Reagent A |                 |            |                                  |                 |                    |
|                                                                                   | Color Reagent B |                 |            |                                  |                 |                    |
| Time of preparation: _____ (Note: It should be used within 15 min of preparation) |                 |                 |            |                                  |                 |                    |

| In-Process Sample Storage                                                             |                                  |                 |            |                     |
|---------------------------------------------------------------------------------------|----------------------------------|-----------------|------------|---------------------|
| Assay ID: _____                                                                       | Or N/Ap <input type="checkbox"/> | Performed ( √ ) | Start Time | Performed by / Date |
| Samples transported from Sample Management.                                           | On dry ice                       | ( )             | N/Ap       |                     |
| Samples thawed, diluted, and kept until loading:                                      | Ambient RT                       | ( )             |            |                     |
| Samples placed in temporary storage after use and until returned to Sample Management | On dry ice                       | ( )             |            |                     |
| In-Process Sample Storage                                                             |                                  |                 |            |                     |
| Assay ID: _____                                                                       | Or N/Ap <input type="checkbox"/> | Performed ( √ ) | Start Time | Performed by / Date |
| Samples transported from Sample Management.                                           | On dry ice                       | ( )             | N/Ap       |                     |
| Samples thawed, diluted, and kept until loading:                                      | Ambient RT                       | ( )             |            |                     |
| Samples placed in temporary storage after use and until returned to Sample Management | On dry ice                       | ( )             |            |                     |
| In-Process Sample Storage                                                             |                                  |                 |            |                     |
| Assay ID: _____                                                                       | Or N/Ap <input type="checkbox"/> | Performed ( √ ) | Start Time | Performed by / Date |
| Samples transported from Sample Management.                                           | On dry ice                       | ( )             | N/Ap       |                     |
| Samples thawed, diluted, and kept until loading:                                      | Ambient RT                       | ( )             |            |                     |
| Samples placed in temporary storage after use and until returned to Sample Management | On dry ice                       | ( )             |            |                     |

| INSTRUMENTS           |    |                   |
|-----------------------|----|-------------------|
| Name                  | ID | Entered by / Date |
| Pipettes              |    |                   |
| Multichannel pipettes |    |                   |

Appendix #1 (AP.BMK.mkpIP10.09)

## Appendix 11

### Appendix 4

#### Plasma IP-10 ELISA Assay Sheet

Study/reference No: \_\_\_\_\_ Assay I.D.: \_\_\_\_\_  
 Page. \_\_\_\_\_ 3 \_\_\_\_\_ of \_\_\_\_\_ 4 \_\_\_\_\_

| ASSAY                                                                                                                                                                                                                                                         |                        |                                  |                                  |                     |
|---------------------------------------------------------------------------------------------------------------------------------------------------------------------------------------------------------------------------------------------------------------|------------------------|----------------------------------|----------------------------------|---------------------|
| Steps                                                                                                                                                                                                                                                         | Time / Performed ( ✓ ) |                                  |                                  | Performed by / Date |
|                                                                                                                                                                                                                                                               | Assay ID:              | Assay ID:                        | Assay ID:                        |                     |
|                                                                                                                                                                                                                                                               |                        | Or N/Ap <input type="checkbox"/> | Or N/Ap <input type="checkbox"/> |                     |
| Bring all assay reagents (except the frozen aliquot of the mkpIP10-STD*) to ambient RT before starting the assay **. Color Reagent A and Color Reagent B should be covered with aluminum foil to avoid light exposure, and should only be mixed prior to use. | ( )                    | ( )                              | ( )                              |                     |
| Pre-Load: add standards, QCs and study samples (one replicate) into a non-coated 96 well plate. Suggested volume is 180 µL. Note that this step can be skipped if insufficient sample volume is available.                                                    | ( ) or N/Ap ( )        | ( ) or N/Ap ( )                  | ( ) or N/Ap ( )                  |                     |
| Before loading, add 75 µL of assay diluent RD1-56 into each well of the assay plate.                                                                                                                                                                          | ( )                    | ( )                              | ( )                              |                     |
| Load: Pipet 75 µL/well of standards, QC samples and study samples in duplicate from the non-coated plate to the appropriate wells of the assay plate. Incubate assay plate for 2 hrs (± 5 min) at ambient RT.                                                 | Start:                 | Start:                           | Start:                           |                     |
| Wash the plate manually 4 times with 350 µL of mkpIP10-WB, and blot the assay plate on an absorbent paper.                                                                                                                                                    | Time:                  | Time:                            | Time:                            |                     |
| Capture/ detection: Add 200 µL of IP-10 conjugate into each well. Incubate for 2 hrs (± 5 min) at ambient RT.                                                                                                                                                 | Start:                 | Start:                           | Start:                           |                     |
| Wash the plate manually 4 times with 350 µL of mkpIP10-WB and blot the assay plate on an absorbent paper.                                                                                                                                                     | Time:                  | Time:                            | Time:                            |                     |
| Just prior to the substrate step prepare the Substrate solution IP-10 (code SS mkpIP-10) protected from light (to be used within 15 minutes of preparation).                                                                                                  | ( )                    | ( )                              | ( )                              |                     |
| Substrate: Add 200 µL of Substrate Solution IP-10 into each well. Cover the assay plate with a plate sealer and aluminum foil and incubate in the DARK for 30 minutes (± 1 minute) at ambient RT.                                                             | Start:                 | Start:                           | Start:                           |                     |
| Stop: Add 50 µL of Stop Solution. The color in the wells should change from blue to yellow. If the color in the wells is green or the color change does not appear uniform, gently tap the plate to ensure thorough mixing.                                   | Time:                  | Time:                            | Time:                            |                     |
| Read the plate with a spectrophotometer set at 450-540 nm. The plate should be read as soon as possible, within 30 minutes of Stop Solution addition and protected from light if not read immediately after addition of the Stop Solution.                    | ( )                    | ( )                              | ( )                              |                     |

\* If used, the frozen aliquot of the mkpIP-10-STD should be brought to ambient RT just prior to use.

\*\* In the event where the kit is packaged in bulk, only the appropriate volume should be brought to ambient RT prior to use, and the leftover should be returned to storage as soon as possible.

Appendix #1 (AP.BMK.mkpIP10.09)

**Appendix 11****Appendix 4****Plasma IP-10 ELISA Assay Sheet**

Study/reference No: \_\_\_\_\_ Assay I.D.: \_\_\_\_\_  
 Page. 4 of 4

| <b>Data Review</b>                                                                | Assay ID: _____ | Assay ID: _____<br>Or N/AP <input type="checkbox"/> | Assay ID: _____<br>Or N/AP <input type="checkbox"/> |
|-----------------------------------------------------------------------------------|-----------------|-----------------------------------------------------|-----------------------------------------------------|
| Number of working calibrators in curve within $\pm 25\%$ of the theoretical value | /               | /                                                   | /                                                   |
| Number of QC1 within acceptance criteria*:                                        | /               | /                                                   | /                                                   |
| Number of QC2 within acceptance criteria*:                                        | /               | /                                                   | /                                                   |
| Number of QC3 within acceptance criteria*:                                        | /               | /                                                   | /                                                   |
| Number of tQC within acceptance criteria*:                                        | /               | /                                                   | /                                                   |
| Data review performed by/Date: _____                                              |                 |                                                     |                                                     |

\* % difference between singlicate values should be within  $\pm 25\%$  and the percent (%) theoretical calculated using the mean concentration should be within 75% - 125%.

| <b>Scientific Review</b>                           | Assay ID: _____   | Assay ID: _____<br>Or N/AP <input type="checkbox"/> | Assay ID: _____<br>Or N/AP <input type="checkbox"/> |
|----------------------------------------------------|-------------------|-----------------------------------------------------|-----------------------------------------------------|
| Standard Curve Blank (STD 0) evaluated:            | Yes or No         | Yes or No                                           | Yes or No                                           |
| Investigation to be provided for blank evaluation: | Yes or No         | Yes or No                                           | Yes or No                                           |
| Assay is acceptable:                               | Yes or No         | Yes or No                                           | Yes or No                                           |
| Sample(s) to repeat:                               | Yes or No or N/Ap | Yes or No                                           | Yes or No                                           |
| Scientific review performed by/Date: _____         |                   |                                                     |                                                     |

Appendix #1 Reviewed by: \_\_\_\_\_ Date: \_\_\_\_\_

Appendix #1 (AP.BMK.mkpIP10.09)

Sponsor Reference No. UTSW-Gray-SPG50-004

Test Facility Study No. 5550014

## Appendix 11

## Appendix 4

## Plasma IP-10 ELISA Spiking Sheet (Kit Standard)

Study/Reference no \_\_\_\_\_  
 Reference standard: IP-10 standard  
 Part. no. 890836  
 Supplier: R&D system

Assay ID: \_\_\_\_\_

IP-10 Standard (Stock) Freshly reconstituted ( ) Fill Table 1 below  
 Frozen aliquot ( ) Table 1 N/Ap ( )  
 Batch ID: Refer to Appendix #1

Batch Expiry date: Refer to Appendix #1

Table 1. Preparation of Standard stock

| Stock ID/Batch ID                                     | IP-10 standard lot number | Volume of UPW added to each vial (μL) <sup>A</sup> |     | Concentration (pg/mL) | Mix by inversion | Time left on bench after reconstitution (At least 15 minutes but no more than 30 minutes) |         | Expiry date of lyophilized standard | Vial label |
|-------------------------------------------------------|---------------------------|----------------------------------------------------|-----|-----------------------|------------------|-------------------------------------------------------------------------------------------|---------|-------------------------------------|------------|
| IP-10 Standard (Stock) <sup>B</sup><br>/ mkplP10-Std- |                           |                                                    | ( ) | 5000.00               | ( )              | Start:                                                                                    | Finish: |                                     |            |

<sup>A</sup>Enter volume manually as per vial label and stick the label in the appropriate space.<sup>B</sup>The Standard reconstituted stock was aliquoted: No ( ) Yes ( ) Freezer ID (if stored): \_\_\_\_\_

Expiry date of reconstituted standard: \_\_\_\_\_

Table 2. Preparation of Standards and Quality control samples

| Sample ID           | Target Concentration (pg/mL) | Stock ID           | Stock Concentration (pg/mL) | Total Volume (μL) | Stock       |               | Calibrator diluent RD6Q |               | Final Concentration (pg/mL) |
|---------------------|------------------------------|--------------------|-----------------------------|-------------------|-------------|---------------|-------------------------|---------------|-----------------------------|
|                     |                              |                    |                             |                   | Volume (μL) | Performed (v) | Volume (μL)             | Performed (v) |                             |
| STD 8 (not loaded)  | 1000.00                      | Stock              | 5000.00                     | 725               | 145         | ( )           | 580                     | ( )           | 1000.00                     |
| <b>STD 7 (ULOQ)</b> | 750.00                       | STD 8 (not loaded) | 1000.00                     | 700               | 525         | ( )           | 175                     | ( )           | 750.00                      |
| STD 6               | 500.00                       | STD 7 (ULOQ)       | 750.00                      | 600               | 400         | ( )           | 200                     | ( )           | 500.00                      |
| STD 5               | 250.00                       | STD 6              | 500.00                      | 550               | 275         | ( )           | 275                     | ( )           | 250.00                      |
| STD 4               | 125.00                       | STD 5              | 250.00                      | 550               | 275         | ( )           | 275                     | ( )           | 125.00                      |
| STD 3               | 60.00                        | STD 4              | 125.00                      | 550               | 264         | ( )           | 286                     | ( )           | 60.00                       |
| <b>STD 2 (LLOQ)</b> | 30.00                        | STD 3              | 60.00                       | 400               | 200         | ( )           | 200                     | ( )           | 30.00                       |
| STD 1               | 15.00                        | STD 2 (LLOQ)       | 30.00                       | 250               | 125         | ( )           | 125                     | ( )           | 15.00                       |
| STD 0               | 0.00                         | N/ap               | 0.00                        | 250               | N/Ap        | (—)           | 250                     | ( )           | 0.00                        |
| QC3                 | 450.00                       | Stock              | 5000.00                     | 600               | 54          | ( )           | 546                     | ( )           | 450.00                      |
| QC2                 | 250.00                       | QC3                | 450.00                      | 560               | 311         | ( )           | 249                     | ( )           | 249.91                      |
| QC1                 | 70.00                        | QC2                | 250.00                      | 450               | 126         | ( )           | 324                     | ( )           | 70.00                       |

Calibrator Diluent RD6Q lot: Refer to Appendix #1

Comments: \_\_\_\_\_

Spiking sheet verified by/Date: \_\_\_\_\_

Performed by/Date: \_\_\_\_\_

Calculations verified by/Date: \_\_\_\_\_

Reviewed by/Date: \_\_\_\_\_

Appendix #2 (AP.BMK.mkplP10.09)

Test Facility Study No. 5550014

Sponsor Reference No. UTSW-Gray-SPG50-004

**Appendix 11**  
**Appendix 4****IP-10 in Monkey Plasma Assay Instructions**

Study/Reference no. : \_\_\_\_\_ Assay ID: \_\_\_\_\_

Kit lot: \_\_\_\_\_ Kit Qualification Assay ID: \_\_\_\_\_

The following Reference Standard should be used for the preparation of the standard curves:

| Reference Material to use                                                       | Lot/Batch ID | Location | Appendix to use |
|---------------------------------------------------------------------------------|--------------|----------|-----------------|
| <input type="checkbox"/> Human IP-10 standard from the kit (Part #890836)       |              |          |                 |
| <input type="checkbox"/> Reconstituted IP-10 Standard from the kit              |              |          |                 |
| <input type="checkbox"/> Monkey reference standard (Bio Basic Cat# RC322-21)    |              |          |                 |
| <input type="checkbox"/> Reconstituted Monkey reference standard (rRhIP-10 STD) |              |          |                 |

The following tQC should be used for the assay.

| QC Identification | Monkey Plasma lot# | Dilution | Location in a freezer set to maintain -20°C or -80°C | tQC concentration (pg/mL) | Source assay and study ID | Source assay date <sup>a</sup> |
|-------------------|--------------------|----------|------------------------------------------------------|---------------------------|---------------------------|--------------------------------|
| tQC               |                    |          |                                                      |                           |                           |                                |

<sup>a</sup> Refer to AP for tQC samples stability. The expiry date on the label of the neat matrix should be SIP.

- LLOQ Threshold: \_\_\_\_\_ pg/mL
- ULOQ Threshold: \_\_\_\_\_ pg/mL
- Analyze study samples : ☐ Neat  
☐ as per provided dilution sheet.

**Comment(s):**


---



---



---

Verified by/date: \_\_\_\_\_

Reviewed by/date: \_\_\_\_\_

Appendix # 3 (AP.BMK.mkpIP10.09)

Sponsor Reference No. UTSW-Gray-SPG50-004

Test Facility Study No. 5550014

# Appendix 11

## Appendix 4

## Plasma IP-10 ELISA Spiking Sheet (Monkey Reference Standard)

Study/Reference No: \_\_\_\_\_ Assay ID: \_\_\_\_\_  
 Reference standard: Recombinant rRhIP-10/ CXCL10 (5µg)  
 Catalogue number: RC322-21  
 Supplier: Bio Basic

Monkey Reference Standard (Stock) Freshly reconstituted ( ) Fill Table 1 below  
 Frozen aliquot ( ) Table 1 N/Ap Batch ID used: Refer to Appendix 1 Batch Expiry date: Refer to Appendix 1

Table 1. Preparation of Monkey Reference Standard stock

| Stock                                                     | Recombinant rRhIP-10/ CXCL10 (5µg/vial) |             |             | Batch assigned | # of reconstituted vial | Volume of 0.1%BSA to add to each vial |               | Final Concentration (µg/mL) |
|-----------------------------------------------------------|-----------------------------------------|-------------|-------------|----------------|-------------------------|---------------------------------------|---------------|-----------------------------|
|                                                           | Vial lot#                               | Inventory # | Expiry date |                |                         | Volume (µL)                           | Performed (✓) |                             |
| Recombinant rRhIP-10/CXCL10 Standard (code: rRhIP-10 STD) |                                         |             |             | rRhIP-10 STD-  | 1                       | 500                                   | ( )           | 10.00                       |

Quick spin: ( ) Centrifuge ID: \_\_\_\_\_

0.1%BSA batch: \_\_\_\_\_ 0.1%BSA expiry date: \_\_\_\_\_

Aliquoting : # aliquots of \_\_\_\_\_ Expiry date: \_\_\_\_\_ Storage: \_\_\_\_\_  
 Box ID: \_\_\_\_\_

Place aliquot label here

Table 2: Preparation of Standards and Quality control samples

| Sample ID    | Stock ID     | Stock Concentration (pg/mL) | Total Volume (µL) | Stock       |               | Calibrator diluent RD6Q |               | Final Concentration (pg/mL) |
|--------------|--------------|-----------------------------|-------------------|-------------|---------------|-------------------------|---------------|-----------------------------|
|              |              |                             |                   | Volume (µL) | Performed (✓) | Volume (µL)             | Performed (✓) |                             |
| Stock 1      | rRhIP-10 STD | 1000000.00                  | 200               | 10          | ( )           | 190                     | ( )           | 500000.00                   |
| Stock 2      | Stock 1      | 500000.00                   | 1000              | 20          | ( )           | 980                     | ( )           | 10000.00                    |
| STD 9        | Stock 2      | 10000.00                    | 1000              | 120         | ( )           | 880                     | ( )           | 1200.00                     |
| STD 8 (ULOQ) | STD 9        | 1200.00                     | 1200              | 600         | ( )           | 600                     | ( )           | 600.00                      |
| STD 7        | STD 8 (ULOQ) | 600.00                      | 600               | 300         | ( )           | 300                     | ( )           | 300.00                      |
| STD 6        | STD 7        | 300.00                      | 600               | 300         | ( )           | 300                     | ( )           | 150.00                      |
| STD 5        | STD 6        | 150.00                      | 600               | 300         | ( )           | 300                     | ( )           | 75.00                       |
| STD 4        | STD 5        | 75.00                       | 700               | 350         | ( )           | 350                     | ( )           | 37.50                       |
| STD 3        | STD 4        | 37.50                       | 800               | 400         | ( )           | 400                     | ( )           | 18.75                       |
| STD 2 (LLOQ) | STD 3        | 18.75                       | 1000              | 500         | ( )           | 500                     | ( )           | 9.38                        |
| STD 1        | STD 2 (LLOQ) | 9.38                        | 300               | 100         | ( )           | 200                     | ( )           | 3.13                        |
| STD 0        | N/Ap         | N/Ap                        | 250               | N/Ap        | (—)           | 250                     | ( )           | 0.00                        |
| QC3          | Stock 2      | 10000.00                    | 2000              | 80          | ( )           | 1920                    | ( )           | 400.00                      |
| QC2          | QC3          | 400.00                      | 925               | 200         | ( )           | 725                     | ( )           | 86.49                       |
| QC1          | QC2          | 86.49                       | 900               | 250         | ( )           | 650                     | ( )           | 24.02                       |

Calibrator Diluent RD6Q lot: Refer to Appendix #1

Comments: \_\_\_\_\_

Spiking sheet Verified by/Date: \_\_\_\_\_ Performed by/Date: \_\_\_\_\_  
 Calculations verified by/Date: \_\_\_\_\_ Reviewed by/Date: \_\_\_\_\_

Appendix #4 (AP.BMK.mkipIP10.09)

Test Facility Study No. 5550014  
 Sponsor Reference No. UTSW-Gray-SPG50-004

**Appendix 11**

**SIGNATURE(S) FOR DOCUMENT: 5550014 - 5550014 Biomarker Final Report Cytokines**

|                                       |                                                                                   |                                  |
|---------------------------------------|-----------------------------------------------------------------------------------|----------------------------------|
| <b><u>Principal Investigator:</u></b> | I approve this document.                                                          |                                  |
| Name:                                 | <b>Harouchi, Hycham</b>                                                           |                                  |
|                                       | 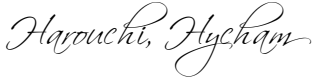 |                                  |
| <hr/>                                 |                                                                                   | <hr/>                            |
| Electronically Signed in              |  | Timestamp                        |
|                                       |                                                                                   | 04-Mar-2022 06:06:28 (UTC+00:00) |

**Appendix 12**

---

**REPORT**

**AAV9/*AP4M1* study in NHPs: Biodistribution, Expression, and Immune Response**

**Appendix 12**

---

Work conducted at University of Texas Southwestern Medical Center in the laboratory of Dr. Steven Gray

Personnel and Role

- Xin Chen: cDNA synthesis, data compilation, and report preparation.
- Kathryn McMillan: Genomic DNA and total RNA preparation, ELISpot assay, and report preparation.
- Sandra Unorji and Melissa Hyatt: qPCR assay
- Yang Yu: qPCR assay/analysis and report preparation.
- Steven Gray: Supervisor and report approval.

I certify that, to the best of my knowledge, the information in this report is correct and a true representation of the work carried out.

---

Xin Chen

Date

*K. McMillan*

1/14/2022

---

Kathryn McMillan

Date

*Sandra Unorji*

01/14/2022

---

Sandra Unorji

Date

**Melissa  
Hyatt**

Digitally signed by Melissa Hyatt  
DN: cn=Melissa Hyatt, o=UTSW  
Southwestern Medical Center, ou=AAV  
Vector Core,  
email=melissa.hyatt@utsouthwestern.edu  
Date: 2022.01.14 09:41:00 -0600

---

Melissa Hyatt

Date

---

Yang Yu

Date

---

Steven Gray

Date

**Appendix 12**

---

**Table of Contents**

|    |                              |    |
|----|------------------------------|----|
| 1. | OBJECTIVE .....              | 4  |
| 2. | ABBREVIATIONS.....           | 4  |
| 3. | MATERIALS AND METHODS .....  | 4  |
| 4. | RESULTS AND DISCUSSION ..... | 5  |
| 5. | CONCLUSIONS.....             | 8  |
| 6. | REFERENCES.....              | 8  |
| 7. | APPENDICES.....              | 20 |

**List of Tables and Figures**

|           |                                                                 |    |
|-----------|-----------------------------------------------------------------|----|
| Table 1.  | Experimental Design.....                                        | 5  |
| Table 3.  | Raw data vg/NHP diploid genome.....                             | 20 |
| Table 4.  | Raw data of expression: copies of AP4M1 per copy of GAPDH ..... | 22 |
| Table 5.  | Raw data of immune response: Spot# in ELISpot plate.....        | 23 |
| Figure 1. | AP4M1 biodistribution in WT NHPs.....                           | 6  |
| Figure 2. | AP4M1 expression in WT NHPs. ....                               | 7  |
| Figure 3. | ELISpot assay.....                                              | 8  |

**Appendix 12****1. OBJECTIVE**

The objective for this study was to characterize the biodistribution, expression, and immune response of self-complementary Adeno-Associated Virus serotype 9 (scAAV9)/UsP-*hAP4M1opt*-BGHpA (AAV9/*AP4M1*), following a single lumbar intrathecal (IT) injection in wild-type (WT) non-human primates (NHPs).

**2. ABBREVIATIONS**

|              |                                               |
|--------------|-----------------------------------------------|
| AAV          | Adeno-Associated Virus                        |
| AP4M1        | Adaptor-related protein complex AP-4, $\mu$ 4 |
| BGH          | Bovine growth hormone                         |
| DNA          | Deoxyribonucleic acid                         |
| ELISpot      | Enzyme-linked immunospot                      |
| INF $\gamma$ | Interferon $\gamma$                           |
| IT           | Lumbar intrathecal                            |
| NHP          | Non-human primate                             |
| PBS          | Phosphate-buffered saline                     |
| PMA          | Phorbol 12-myristate 13-acetate               |
| qPCR         | Quantitative PCR                              |
| RNA          | Ribonucleic acid                              |
| Sc           | Self-complementary                            |
| UsP          | Promoter                                      |
| vg           | Vector genomes                                |
| WT           | Wild type                                     |

**3. MATERIALS AND METHODS****3.1 AAV9/*AP4M1* Production**

AAV9/*AP4M1* in Phosphate-buffered saline (PBS), 5% Sorbitol, pH 7.4 containing 0.001% F-68 was produced by Viralgen in Spain. The final vector product (lot # T-GEMINIS-033) was prepared with a titer of  $5.43 \times 10^{13}$  vector genomes (vg) /mL (COA in section 7. APPENDICES).

**3.2 Animal Studies**

Animal study was performed by Charles River Laboratories, Inc. Mattawan MI. Male and female NHPs were randomized into cohorts and dosed as shown in Table 1. At the initiation of dosing, the animals assigned to study were 2 to 4 years of age and weighed between 1.5 to 6 kg. AAV9/*AP4M1* vector was injected IT once on day 1 in each animal, in a volume of 1, 1.55, or 3.1 mL, at the infusion rate of 1 mL/min, and a final dose of 0,  $8.4 \times 10^{13}$ , or  $1.68 \times 10^{14}$  vg/NHP. NHPs were sacrificed on day 94. Tissues were collected frozen, and lymphocytes were prepared, and then sent to Dr. Gray's laboratory on dry ice for further analysis.

## Appendix 12

**Table 1. Experimental Design**

| Group No. | Test Material      | Dose Level (vg/animal) | Dose Concentration (vg/mL) | Dose Volume (mL) | Animal Numbers |            |
|-----------|--------------------|------------------------|----------------------------|------------------|----------------|------------|
|           |                    |                        |                            |                  | Main Study     |            |
|           |                    |                        |                            |                  | Male           | Female     |
| 1         | Vehicle            | 0                      | 0                          | 1                | 1201           | 1701       |
| 2         | AAV9/ <i>AP4M1</i> | $8.4 \times 10^{13}$   | $5.43 \times 10^{13}$      | 1.55             | -              | 2701, 2702 |
| 3         | AAV9/ <i>AP4M1</i> | $1.68 \times 10^{14}$  | $5.43 \times 10^{13}$      | 3.10             | 3201           | 3701       |

**3.3 Biodistribution and Expression Analysis by qPCR**

Total genomic DNA and RNA were purified from tissue samples collected at necropsy day 94, using a Qiagen Qiacube HT kit. cDNA was synthesized from purified RNA and qPCR was used to determine the quantity of AAV9/*AP4M1* vector DNA biodistribution and *AP4M1* RNA transgene expression. Qualification of the qPCR assay is attached in the section 6. REFERENCES.

**3.4 Immune response by ELISpot**

Both peptide library pools of AAV9 capsid and AP4M1 protein were purchased from Mimotopes, Victoria, Australia. The peptides libraries were comprised of 10-mers with a 5 amino acid offset. The AAV9 capsid library pool contained 147 peptides and the AP4M1 protein library pool contained 89 peptides. Both pools were stored at -80°C before use. ELISpot assays were performed using Human IFN- $\gamma$  96-well White Precoated CTL-TrueBlue substrate (Fisher, NC1787696). Briefly, splenocytes were thawed, washed, and resuspended in cRPMI-1640 medium for counting.  $2 \times 10^5$  splenocytes in 100  $\mu$ L of cRPMI-1640 medium were plated into each well of an ELISpot plate. 100  $\mu$ L of cRPMI-1640 medium containing the AAV9 capsid pool or the AP4M1 protein pool at 1  $\mu$ g/well was then added to the wells. The controls included cells with no peptide, cells stimulated with a mixture of Phorbol 12-myristate 13-acetate (PMA) and Ionomycin (Invitrogen, 00-4970-93), medium with human INF $\gamma$  (Fisher, 50-813-413), or medium only. The splenocytes were incubated for 48 hours in a humidified 37°C CO<sub>2</sub> incubator. The detailed steps of the ELISpot assay are attached in the references.

**4. RESULTS AND DISCUSSION**

A study was conducted in WT NHPs with each animal receiving a single IT injection of AAV9/*AP4M1* vector at a dose of 0,  $8.4 \times 10^{13}$ , or  $1.68 \times 10^{14}$  total vg. Genomic DNA was purified from the samples collected at necropsy day 94. *AP4M1* vector biodistribution was quantified by qPCR and provided in Figure 1. IT delivery of AAV9/*AP4M1* vector results in delivery of *AP4M1* vector DNA across the central nervous system and peripheral organs. The *AP4M1* vector DNA is widely detected at high level in multiple brain regions. In the peripheral organs, even higher amounts of *AP4M1* DNA persist in liver and to the less extent in other organs tested. Consistent with this *AP4M1* DNA biodistribution data, *AP4M1* transgene expression is also widely detected at high level in multiple CNS and peripheral tissues (Figure 2). Collectively, IT delivery of AAV9/*AP4M1* results in broad *AP4M1* biodistribution and expression across the body of NHPs.

## Appendix 12

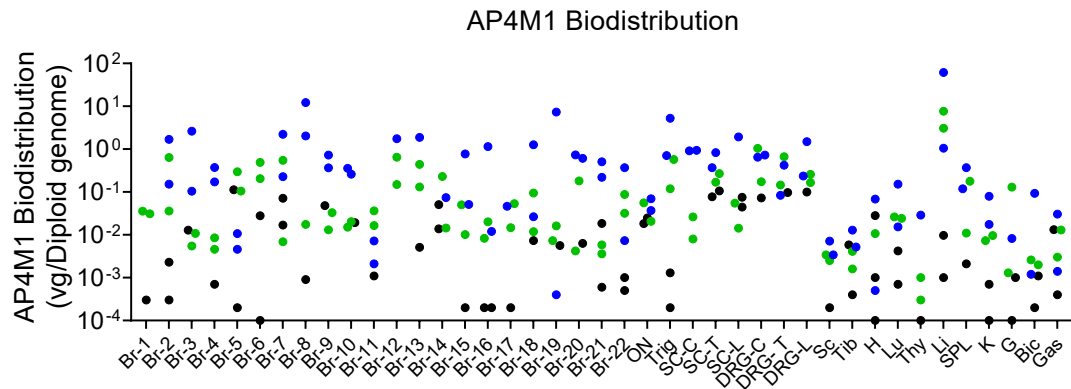

**Figure 1.** *AP4M1* biodistribution in WT NHPs.

WT NHPs received a single IT injection of AAV9/*AP4M1* at a dose of 0 (black dots),  $8.4 \times 10^{13}$  (green dots), or  $1.68 \times 10^{14}$  (blue dots) vg. Genomic DNA was purified from the samples collected at necropsy day 94, and *AP4M1* vector biodistribution across the central nervous and peripheral organs was quantified by qPCR. Results were presented as Mean $\pm$ SEM. Br, Brain; ON, Optic Nerve; Trig, Trigeminal G; SC-C, Spinal Cord-Cervical; SC-T, Spinal Cord-Thoracic; SC-Lumbar, Spinal Cord-Lumbar; DRG-C, Dorsal Root Ganglion-Cervical; DRG-T, Dorsal Root Ganglion-Thoracic; DRG-L, Dorsal Root Ganglion-Lumbar; Sc, Sciatic Nerve; Tib, Tibia Nerve; H, Heart; Lu, Lung; Thy, Thymus; Li, Liver; SPL, Spleen; K, Kidney; G, Gonad; Bic, Biceps Femoris; Gas, gastrocnemius.

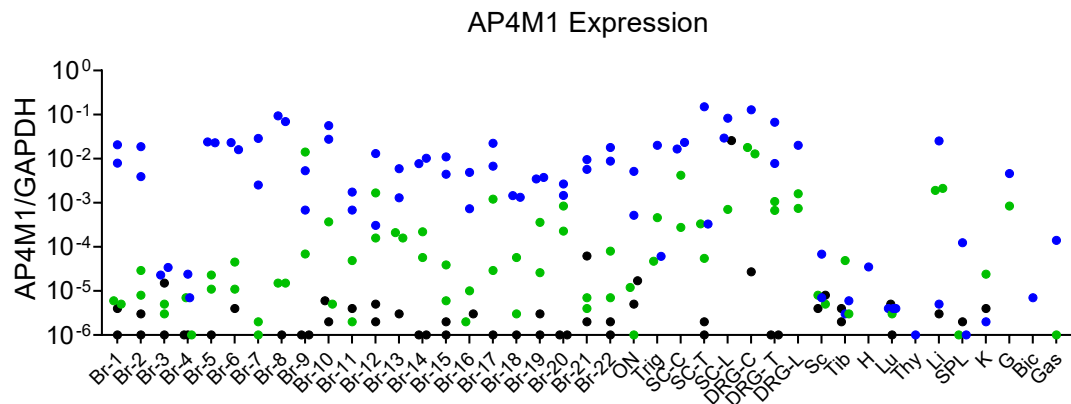

## Appendix 12

**Figure 2. *AP4M1* expression in WT NHPs.**

WT NHPs received a single IT injection of AAV9/*AP4M1* at a dose of 0 (black dots),  $8.4 \times 10^{13}$  (green dots), or  $1.68 \times 10^{14}$  (blue dots) vg. Total RNA was purified from the samples collected at necropsy day 94, cDNA was synthesized, and *AP4M1* expression across the central nervous and peripheral organs was quantified by qPCR. Results were presented as Mean  $\pm$  SEM. Br, Brain; ON, Optic Nerve; Trig, Trigeminal G; SC-C, Spinal Cord-Cervical; SC-T, Spinal Cord-Thoracic; SC-Lumbar, Spinal Cord-Lumbar; DRG-C, Dorsal Root Ganglion-Cervical; DRG-T, Dorsal Root Ganglion-Thoracic; DRG-L, Dorsal Root Ganglion-Lumbar; Sc, Sciatic Nerve; Tib, Tibia Nerve; H, Heart; Lu, Lung; Thy, Thymus; Li, Liver; SPL, Spleen; K, Kidney; G, Gonad; Bic, Biceps Femoris; Gas, gastrocnemius.

Immune responses to AAV and/or transgene remain a challenge that can confound the safety and efficacy of AAV-mediated gene transfer. This study evaluated the T-cell  $\text{INF}\gamma$  immune response to the AAV9/*AP4M1* vector in WT NHPs. Specifically, splenocytes from WT NHPs IT injected with AAV9/*AP4M1* vectors 94 days prior were plated and treated *in vitro* with either AAV9 capsid or AP4M1 protein peptide pools for 2 days along with both negative (no peptide) and positive (PMA + Ionomycin) controls.

While the negative control has 0 spots (Figure 3), the positive controls have many spots (Table 5). Panels A and B in Figure 3 show the  $\text{INF}\gamma$  response to the AAV9 capsid pool and AP4M1 protein pool, respectively. None of the vehicle, low ( $8.4 \times 10^{13}$  vg) or high ( $1.68 \times 10^{14}$  vg) dose of AAV9/*AP4M1* vector generated any increase of the spot numbers compared to negative control, indicating that the AAV9/*AP4M1* vector generated no detectable T-cell immune response in WT NHPs, to either AAV9 or the human AP4M1 protein, under the immunosuppressant protocol.

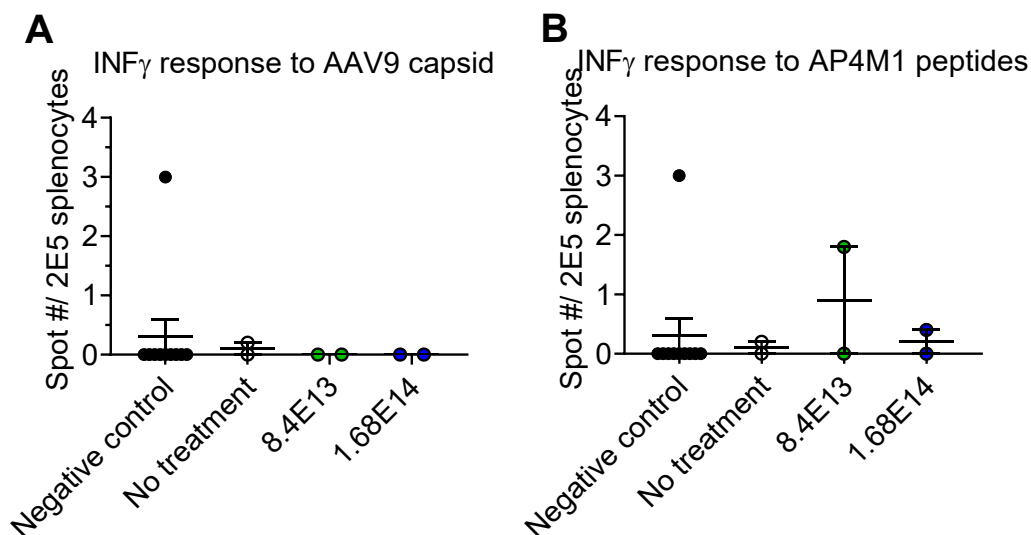

**Appendix 12**

---

**Figure 3. ELISpot assay**

Spot numbers in each well were blindly counted with a specialized automated ELISpot reader. Each data point represents the mean value of duplicate assays for the negative control or the mean value of quintuplicate assays from an individual animal specimen, with lines representing the mean measurement  $\pm$  SEM.

**5. CONCLUSIONS**

The AAV9 vector genome DNA biodistribution pattern should be dependent on the capsid, regardless of the DNA cargo that it carries, which is further supported by the similar pattern of DNA biodistribution from this study using AAV9/*AP4M1* as that expected for AAV9. The exceptions to this would be if an immune response led to viral clearance, or if there was toxicity against the expressed transgene that led to cell death and loss of viral genomes. In this study, it was concluded that AAV9 delivered IT can achieve broad distribution as well as expression across the nervous system and peripheral organs without generating any immune response under the immunosuppressant protocol, although the level of gene transfer in the brain is sub-saturating with a minority of cells receiving the transgene. Thus, this study is considered to portray the normal biodistribution and expression pattern expected for an AAV9 vector in NHPs. These results do not suggest any loss of vector due to cellular toxicity.

**6. REFERENCES****6.1 Standard Operating Procedure****6.1.1 Non-Human Primate Samples for DNA and RNA Extraction**

*Prepared by Kathryn McMillan, UTSW Medical Center*

Version: 02-02-2021

1. Exposure Reporting: Immediately report any exposure incident to your Principal Investigator, Safety Investigator, and/or call the University Employee Occupational Health Clinic. The specimen involved in the exposure/injury should be secured at  $<-60^{\circ}\text{C}$  (unless whole blood then  $2-6^{\circ}\text{C}$ ) so that it can be used for confirmation purposes.
  - a. University Employee Occupational Health Clinic: 8:00am – 5:00pm 214-645-5300
  - b. Environment Health and Safety: 214-645-1317. Ask for the Biological Safety Officer.
  - c. Emergency: 911.
2. All manipulations of non-human primate samples must be performed in the biological safety cabinet (BSC) designated for non-human primate work in NA2.510B. Signs will be posted at the entrance to the hood area in NA2.510B and on the actual hood where work with the non-human primate samples is under progress. The sign will say “Do Not Enter, Monkey Sample Work in Progress.”
3. Surfaces of all materials removed from the BSC (this includes hands and pipette man) must be sprayed with Vesphene disinfectant and be free of infectious agents. The sash of the BSC should be raised and the BSC operated for at least 15 minutes before work begins.
4. Double gloves must be worn at all times while working with non-human primate samples or anything in this BSC. Disposable lab coat or disposable tyvek sleeves, face mask and goggles must be worn at all times when working with all non-human primate samples.

**Appendix 12**

- 
5. Sharps use and generation of aerosols will be minimized. No glass is allowed to be used at any time for non-human primate sample manipulations. This includes glass pipettes for aspiration. Use only plastic serological pipettes and barrier pipette tips instead.
  6. In case of spills inside the BSC: contaminated surfaces will be soaked with Vesphene disinfectant and covered with a paper towel for 30 minutes. The towels will be removed and placed in a biohazard waste bag. The hood will be completely wiped down with Vesphene, dried with paper towels, then wiped down with 70% ethanol and allowed to air dry. For spills outside the BSC, contaminated surfaces will be soaked with 10% bleach and after a 30-minute contact time, dried with paper towels and handled as biohazardous waste.
  7. All non-human primate non-liquid waste (plates, tubes, pipettes, tips, etc.) will be placed in a plastic bin containing a solution of 10% bleach. Interior surfaces of tips, pipettes, plates, tubes, etc. must be completely exposed to 10% bleach solution either by drawing bleach solution into the pipette or container, or by completely submerging items individually and inspecting for contact with bleach. Waste will be left in the bleach solution for at least 20 minutes, emptied of all liquid, and placed in a small biohazard waste bag in a secondary container in the BSC. This bag will be tied up and disinfected before it is removed from the hood. Biohazard waste will be taken to the autoclave room (NA2.218) and immediately autoclaved by the lab worker generating the waste.
  8. Non-human primate sample liquid material (or solutions coming in contact with non-human primate samples) may be aspirated into waste flask for inactivation. Flask must contain a volume of undiluted bleach prior to use equal to 10% of the volume of the flask. When finished aspirating, tubing must be cleaned by aspiration of a 10% bleach solution followed by aspiration of 70% ethanol (leaving residual bleach in tubing will destroy it). Let the bleach have a minimum 30-minute contact time with the solution in the flask before pouring the solution down the sink. You must wear PPE during this time.
  9. Non-human primate samples still considered infectious that are removed from BSC will only be transported to the designated incubator in NA2.510, the -80 C freezer in NA2.510 or other approved laboratory spaces (as indicated on the Lab Safety Plan Schedule F), using secondary containment from all exits from NA2.510.
  10. The following method will inactivate the non-human primate samples to be used for work outside of the BSC:

On dry ice, frozen tissue samples will be placed in a round-bottomed tube in an S-block (from Qiagen) containing a 5- or 7-mm stainless steel bead and incubated on dry ice for 15 minutes. Each S-Block is then moved to room temperature and 0.6 mL of RLT buffer with beta-mercaptoethanol added (from Qiagen All prep Kit) will be added to each tube, then the lid is closed. The tube containing sample and buffer will be placed in a Qiagen TissueLyser LT inside the BSC, and the tissue will be lysed according to the manufacturer's instructions. Following complete lysis of the tissue, the samples are considered safe for use outside of BSC and are no longer considered BSL2. Care should be taken to ensure that the samples are completely lysed.

11. Removal of waste materials from the cabinet:
  - a. Following a contact time of 30 minutes, bleach tray and aspirator waste flask materials are disposed down the drain with plenty of water.

**Appendix 12**

- 
- b. Chemicals used for inactivating agent may be flushed down the drain with plenty of water and/or aspirated, followed by bleach and 70% ethanol.
  - c. The autoclave waste bag will be loosely tied with autoclave tape, and an X placed over the biohazard sign. The bag will be immediately autoclaved, then disposed of as non-hazardous trash.
  - 12. When finished working in BSC, wipe down all surfaces with Vesphene (i.e. all materials and internal walls of the BSC). When dry, spray everything with 70% ethanol and leave to air dry. BSC is never to be turned off and the sash should remain open to the protective level at all times. UV light is not a recognized disinfectant.
  - 13. When finished disinfecting all surfaces after working with non-human primate samples, remove your outer gloves, then your lab coat and mask, then your inner gloves. Dispose gloves and any disposable PPE in the Biohazard waste.
  - 14. Wash hands inside NA2.510B when finished working. Wash hands in the main lab once you have left NA2.510B.

**6.1.2 DNA Extraction from Animal Tissues using QIAamp 96 DNA QIAcube HT Kit (5) (Qiagen, 51331).**

DNA extraction was performed per manufacture recommendation except that the buffer used was not RTL buffer but ATL buffer. Prepared ATL + Proteinase K at (33mL ATL + 3 mL ProK). Used 400uL for non-CNS tissues and 300uL for CNS tissues. After 2 rounds of TissueLyser II, incubated overnight and transferred 200uL to fresh S-block for extraction. Considered safe outside of BSL-2 post incubation.

**6.1.3 Total RNA Extraction from Animal Tissues using RNeasy 96 QIAcube HT Kit (5) (Qiagen, 74171).**

RNA extraction was performed per manufacture recommendation except that buffer was Qiazol reagent, 750mL. Homogenized twice, incubated at room temperature for 5 min, added 150uL chloroform, shaken vigorously. Spun at top speed for 1min, then pulled top layer (300uL) into new S-block for extraction. Considered safe outside of BSL-2 after chloroform step.

**6.1.4 cDNA Synthesis for qPCR with RT2 HT First Strand Kit (Qiagen, 330411)**

cDNA synthesis was performed per manufacture recommendation.

**6.1.5 Quantification of *AP4M1* in monkey gDNA samples.**

*Prepared by Yang Yu, UTSW Medical Center*

Version: **09-06-2021**

**A. Overview**

This protocol is designed to use quantitative PCR (qPCR) to determine the double-stranded copies of the *AP4M1* DNA present in a purified genomic DNA sample. This SOP has been optimized and validated for use with monkey genomic DNA. The total amount of sample DNA (host genomes) is determined by SYBR green qPCR analysis with primers specific to Monkey GAPDH, and the copies of *hAP4M1*opt DNA within each sample is determined by SYBR green qPCR analysis with primers specific for *hAP4M1*opt.

**B. Quantification of *hAP4M1* DNA in gDNA sample**

1. *Make plasmid DNA standards*

**Appendix 12**

Dilute linearized plasmid DNA (pTRS-Usp-*hAP4M1opt*-BGHpA) to  $1.59 \times 10^9$  double-stranded copies/ $\mu$ L stock in 10 mM Tris-EDTA buffer pH 8 (Invitrogen Cat# 9858) in 1.5 mL siliconized tubes (Fisher Cat# 02681331). Make a first dilution 1:200 to  $7.95 \times 10^6$  copies following by serial 1:10 dilutions to 7.95 copies/ $\mu$ L. 2  $\mu$ L of each dilution are loaded to each reaction. All dilutions are prepared with 10 mM Tris prepared from 1M Tris pH 8 (Invitrogen Cat# AM9855G) with UltraPure DNase/RNase-free distilled water (Invitrogen Cat# 10977-015). Vortex and spin briefly in every step.

|                                    |                                                                                   |
|------------------------------------|-----------------------------------------------------------------------------------|
| 1.59 $\times 10^7$ copies/reaction | 2 $\mu$ L of 1.59 $\times 10^9$ copies/ $\mu$ L stock + 398 $\mu$ L of 10 mM Tris |
| 10 $\mu$ L                         |                                                                                   |
| 1.59 $\times 10^6$ copies/reaction | + 90 $\mu$ L of 10 mM Tris                                                        |
| 10 $\mu$ L                         |                                                                                   |
| 1.59 $\times 10^5$ copies/reaction | + 90 $\mu$ L of 10 mM Tris                                                        |
| 10 $\mu$ L                         |                                                                                   |
| 1.59 $\times 10^4$ copies/reaction | + 90 $\mu$ L of 10 mM Tris                                                        |
| 10 $\mu$ L                         |                                                                                   |
| 1.59 $\times 10^3$ copies/reaction | + 90 $\mu$ L of 10 mM Tris                                                        |
| 10 $\mu$ L                         |                                                                                   |
| 1.59 $\times 10^2$ copies/reaction | + 90 $\mu$ L of 10 mM Tris                                                        |
| 10 $\mu$ L                         |                                                                                   |
| 15.9 copies/reaction               |                                                                                   |

2. *Prepare the qPCR SYBR master reactions*

1) Set up gDNA samples as follows.

|                                                                             |                                              |
|-----------------------------------------------------------------------------|----------------------------------------------|
| 2 $\times$ SYBR master mix                                                  | 10 $\mu$ L (Roche Cat# 04887352001)          |
| Forward Primer (20 $\mu$ M)                                                 | 0.5 $\mu$ L (CCCTGGGCGAAGGAAGTATC, IDT, Inc) |
| Reverse Primer (20 $\mu$ M)                                                 | 0.5 $\mu$ L (CACAGCCTCGGTCTGAATGA, IDT, Inc) |
| H <sub>2</sub> O                                                            | 7 $\mu$ L (Teknova Cat# W3440)               |
| a. Pipet 18 $\mu$ L of master mix into each well intended for gDNA samples. |                                              |
| b. Add 2 $\mu$ L of sample gDNA to the well.                                |                                              |

2) Set up standard plasmid DNA as follows.

|                                                                                       |                                              |
|---------------------------------------------------------------------------------------|----------------------------------------------|
| 2 $\times$ SYBR master mix                                                            | 10 $\mu$ L (Roche Cat# 04887352001)          |
| Forward Primer (20 $\mu$ M)                                                           | 0.5 $\mu$ L (CCCTGGGCGAAGGAAGTATC, IDT, Inc) |
| Reverse Primer (20 $\mu$ M)                                                           | 0.5 $\mu$ L (CACAGCCTCGGTCTGAATGA, IDT, Inc) |
| H <sub>2</sub> O                                                                      | 7 $\mu$ L (Teknova Cat# W3440)               |
| a. Pipet 18 $\mu$ L of master mix into each well intended for standard curve samples. |                                              |
| b. Add 2 $\mu$ L of plasmid DNA standard to the appropriate well.                     |                                              |
| c. Add H <sub>2</sub> O as no template control.                                       |                                              |
| d. Seal the plate with the seal for qPCR usage. (Roche Cat# 04-729-749-001)           |                                              |
| e. Spin down the plate @ 1800 rpm for 10 sec.                                         |                                              |
| f. Cycle in the Roche LightCycler480.                                                 |                                              |

**C. Quantification of Monkey *GAPDH***

1. *Make genomic DNA standards*

- 1) Measure the monkey liver gDNA concentration using the LVis plate with the CLARIOstar plate reader (BMG LABTECH). Use the concentration of 58.075 ng/ $\mu$ L as the highest dilution stock.

**Appendix 12**

2) Make 6 serial 1:4 dilutions with 10 mM Tris from 58.075 ng / $\mu$ L to 0.0142 ng/ $\mu$ L.

2. *Preparation of gDNA samples for qPCR run*

1) Mix samples by pipetting up and down, then spin at 1800 rpm for 10 sec.

3. *Prepare the qPCR SYBR master reactions*

1) Set up standard gDNA and gDNA samples as follows.

- |                             |                                            |
|-----------------------------|--------------------------------------------|
| 2 $\times$ SYBR master mix  | 10 $\mu$ L (Roche Cat# 04887352001)        |
| Forward Primer (20 $\mu$ M) | 0.25 $\mu$ L (GGCCTCCAAGGAGTAAGACC, Sigma) |
| Reverse Primer (20 $\mu$ M) | 0.25 $\mu$ L (TCTCTTCCTCTTGCTCTCG, Sigma)  |
| H <sub>2</sub> O            | 7.5 $\mu$ L (PCR water Teknova Cat# W3440) |
- Pipet 18  $\mu$ L of master mix into each well intended for gDNA samples.
  - Add 2  $\mu$ L of gDNA standard or gDNA samples
  - Add H<sub>2</sub>O as no template control.
  - Seal the plate with the seal for qPCR usage. (Roche Cat# 04-729-749-001)
  - Spin down the plate @ 1800 rpm for 10 sec.
  - Cycle in the Roche LightCycler480.

**D. Running Cycles*****hAP4M1opt***

|               | Target (°C) | Time (hh:mm:ss) | Cycle | Acquisition Mode | Ramp Rate | Acquisitions    | Detect Mode          |
|---------------|-------------|-----------------|-------|------------------|-----------|-----------------|----------------------|
| Denature      | 95          | 0:10:00         | 1     | none             | 4.8       |                 | SyBr green I/HRM Dye |
| Amplification | 95          | 0:00:10         | 55    | none             | 4.8       |                 |                      |
|               | 60          | 0:00:10         |       | none             | 2.5       |                 |                      |
|               | 72          | 0:00:10         |       | single           | 4.8       |                 |                      |
| Melt          | 95          | 0:00:05         | 1     | none             | 4.8       |                 |                      |
|               | 65          | 0:01:00         |       | none             | 2.5       |                 |                      |
|               | 95          |                 |       | continuous       | 0.11      | 5/ $^{\circ}$ C |                      |
| Cool          | 40          | 0:00:10         | 1     | none             | 2.5       |                 |                      |

***Monkey GAPDH***

|               | Target (°C) | Time (hh:mm:ss) | Cycle | Acquisition Mode | Ramp Rate | Acquisitions    | Detect Mode          |
|---------------|-------------|-----------------|-------|------------------|-----------|-----------------|----------------------|
| Denature      | 95          | 0:10:00         | 1     | none             | 4.8       |                 | SyBr green I/HRM Dye |
| Amplification | 95          | 0:00:10         | 45    | none             | 4.8       |                 |                      |
|               | 60          | 0:00:10         |       | none             | 2.5       |                 |                      |
|               | 72          | 0:00:10         |       | single           | 4.8       |                 |                      |
| Melt          | 95          | 0:00:05         | 1     | none             | 4.8       |                 |                      |
|               | 65          | 0:01:00         |       | none             | 2.5       |                 |                      |
|               | 95          |                 |       | continuous       | 0.11      | 5/ $^{\circ}$ C |                      |
| Cool          | 40          | 0:00:10         | 1     | none             | 2.5       |                 |                      |

**Appendix 12****E. Analysis**

Use Ab Quant/ 2<sup>nd</sup> derivative max in LightCycler 480 v1.5 software to calculate the number of genomes per sample relative to the plasmid DNA standard curve or the amount of host DNA in ng relative to the monkey gDNA standard. Use Tm calling as a quality control to check whether the specific product was amplified.

Calculation of number of copies of viral genome/ $\mu$ L

$$= \frac{\text{Copy of virus genome as double strand DNA relative to the copy number of plasmid DNA standard}}{2}$$

- Calculation of genome copies and amount ( $\mu$ g) of host DNA relative to the ng amount of host DNA standard

This calculation assumes that the average weight of a bp of a double strand DNA is 620 g/mol, thus the molecular weight of DNA of 3 billion bps in a haploid cell is  $1.85 \times 10^{12}$  g/mol. The quantity of DNA in each cell contains  $(1.85 \times 10^{12} \text{ g/mol}) \times (1 \text{ mole} / 6.022 \times 10^{23} \text{ molecules}) \times 2 = 6 \text{ pg}$  of diploid DNA, so 1 pg of DNA contains 0.167 double strand copies = 0.334 single-stranded copies of DNA, and 1 ng = 334 single-stranded copies.

$$\text{ng} \times 334 \text{ (single stranded copies = genome)}$$

Number of monkey GAPDH genome copies =  $\frac{\text{dilution factor} \times 2}{\text{ng} \times 334}$

Conversion from ng/ $\mu$ L to  $\mu$ g/ $\mu$ L amount of host DNA = ng/ $\mu$ L of host DNA  $\times 1000$

- Calculation of number of copies of Viral genomes normalized to number of copies of genome host

$$= \frac{\text{Copies of viral genome}/\mu\text{L}}{\text{Copies of genome DNA in host}/\mu\text{L}}$$

- Calculation of number of copies of Viral genomes normalized to amount of host DNA host ( $\mu$ g)

$$= \frac{\text{Copies of viral genome}/\mu\text{L}}{\text{amount of DNA in host } (\mu\text{g})/\mu\text{L}}$$

**6.1.6 Quantification of AP4M1 in monkey cDNA samples.**

Prepared by Yang Yu, UTSW Medical Center

Version: 09-06-2021

**A. Overview**

This protocol is designed to use quantitative PCR (qPCR) to determine the single-stranded copies of the AP4M1 cDNA present in a synthesized cDNA sample. This SOP has been optimized and validated for use with monkey cDNA. The total amount of sample cDNA (host genomes) is determined by SYBR green qPCR analysis with primers specific to Monkey GAPDH, and the copies of hAP4M1opt cDNA within each sample is determined by SYBR green qPCR analysis with primers specific for hAP4M1opt.

**B. Quantification of hAP4M1 DNA in cDNA sample***1. Make plasmid DNA standards*

Dilute linearized plasmid DNA (pTRS-USP-hAP4M1opt-BGHpA) to  $1.59 \times 10^9$  double-stranded copies/ $\mu$ L stock in 10 mM Tris-EDTA buffer pH 8 (Invitrogen Cat# 9858) in 1.5 mL siliconized tubes (Fisher Cat# 02681331). Make a first dilution 1:200 to  $7.95 \times 10^6$  copies/ $\mu$ L following by serial 1:10 dilutions to 7.95copies/ $\mu$ L. 2  $\mu$ L of each dilution are loaded to each reaction. All dilutions are prepared with 10 mM Tris prepared from 1M Tris pH 8 (Invitrogen Cat# AM9855G) with UltraPure DNase/RNase-free distilled water (Invitrogen Cat# 10977-015). Vortex and spin briefly in every step.

**Appendix 12**


---

|                                      |                                                                     |
|--------------------------------------|---------------------------------------------------------------------|
| 1.59×10 <sup>7</sup> copies/reaction | 10 µL of 1.59×10 <sup>9</sup> copies/µL stock + 90 µL of 10 mM Tris |
| 10 µL ↻                              |                                                                     |
| 1.59×10 <sup>6</sup> copies/reaction | + 90 µL of 10 mM Tris                                               |
| 10 µL ↻                              |                                                                     |
| 1.59×10 <sup>5</sup> copies/reaction | + 90 µL of 10 mM Tris                                               |
| 10 µL ↻                              |                                                                     |
| 1.59×10 <sup>4</sup> copies/reaction | + 90 µL of 10 mM Tris                                               |
| 10 µL ↻                              |                                                                     |
| 1.59×10 <sup>3</sup> copies/reaction | + 90 µL of 10 mM Tris                                               |
| 10 µL ↻                              |                                                                     |
| 1.59×10 <sup>2</sup> copies/reaction | + 90 µL of 10 mM Tris                                               |
| 10 µL ↻                              |                                                                     |
| 15.9copies/reaction                  |                                                                     |

2. *Prepare the qPCR SYBR master reactions*

## 1) Set up cDNA samples as follows.

- |                        |                                         |
|------------------------|-----------------------------------------|
| 2× SYBR master mix     | 10 µL (Roche Cat# 04887352001)          |
| Forward Primer (20 µM) | 0.5 µL (CCCTGGGCGAAGGAACTATC, IDT, Inc) |
| Reverse Primer (20 µM) | 0.5 µL (CACAGCCTCGGTCTGAATGA, IDT, Inc) |
| H <sub>2</sub> O       | 7 µL (Teknova Cat# W3440)               |
- Pipet 18 µL of master mix into each well intended for cDNA samples.
  - Add 2 µL of sample cDNA to the well.

## 2) Set up standard plasmid DNA as follows.

- |                        |                                         |
|------------------------|-----------------------------------------|
| 2× SYBR mater mix      | 10 µL (Roche Cat# 04887352001)          |
| Forward Primer (20 µM) | 0.5 µL (CCCTGGGCGAAGGAACTATC, IDT, Inc) |
| Reverse Primer (20 µM) | 0.5 µL (CACAGCCTCGGTCTGAATGA, IDT, Inc) |
| H <sub>2</sub> O       | 7 µL (Teknova Cat# W3440)               |
- Pipet 18 µL of master mix into each well intended for standard curve samples.
  - Add 2 µL of plasmid DNA standard to the appropriate well.
  - Add H<sub>2</sub>O as no template control.
  - Seal the plate with the seal for qPCR usage. (Roche Cat# 04-729-749-001)
  - Spin down the plate @ 1800 rpm for 10 sec.
  - Cycle in the Roche LightCycler480.

**C. Quantification of Monkey GAPDH**1. *Make genomic DNA standards*

- Measure the monkey liver gDNA concentration using the LVis plate with the CLARIOstar plate reader (BMG LABTECH). Use the concentration of 58.075ng/µL as the highest dilution stock.
- Make 6 serial 1:4 dilutions with 10 mM Tris from 58.075ng /µL to 0.0142ng/µL.

2. *Preparation of cDNA samples for qPCR run*

- Mix samples by pipetting up and down, then spin at 1800 rpm for 10 sec.

3. *Prepare the qPCR SYBR master reactions*

**Appendix 12**

- 1) Set up standard gDNA and cDNA samples as follows.
- |                        |                                        |
|------------------------|----------------------------------------|
| 2× SYBR mater mix      | 10 µL (Roche Cat# 04887352001)         |
| Forward Primer (20 µM) | 0.25 µL (GGCCTCCAAGGAGTAAGACC, Sigma)  |
| Reverse Primer (20 µM) | 0.25 µL (TCTCTTCCTCTTGTGCTCTCG, Sigma) |
| H <sub>2</sub> O       | 7.5 µL (PCR water Teknova Cat# W3440)  |
- Pipet 18 µL of master mix into each well intended for cDNA samples.
  - Add 2 µL of gDNA standard or cDNA samples
  - Add H<sub>2</sub>O as no template control.
  - Seal the plate with the seal for qPCR usage. (Roche Cat#04-729-692-001)
  - Spin down the plate @ 1800 rpm for 10 sec.
  - Cycle in the Roche LightCycler480.

**D. Running Cycles****hAP4M1opt**

|               | Target (°C) | Time (hh:mm:ss) | Cycle | Acquisition Mode | Ramp Rate | Acquisitions | Detect Mode          |
|---------------|-------------|-----------------|-------|------------------|-----------|--------------|----------------------|
| Denature      | 95          | 0:10:00         | 1     | none             | 4.8       |              | SyBr green I/HRM Dye |
| Amplification | 95          | 0:00:10         | 55    | none             | 4.8       |              |                      |
|               | 60          | 0:00:10         |       | none             | 2.5       |              |                      |
|               | 72          | 0:00:10         |       | single           | 4.8       |              |                      |
| Melt          | 95          | 0:00:05         | 1     | none             | 4.8       |              |                      |
|               | 65          | 0:01:00         |       | none             | 2.5       |              |                      |
|               | 95          |                 |       | continuous       | 0.11      | 5/°C         |                      |
| Cool          | 40          | 0:00:10         | 1     | none             | 2.5       |              |                      |

**Monkey GAPDH**

|               | Target (°C) | Time (hh:mm:ss) | Cycle | Acquisition Mode | Ramp Rate | Acquisitions | Detect Mode          |
|---------------|-------------|-----------------|-------|------------------|-----------|--------------|----------------------|
| Denature      | 95          | 0:10:00         | 1     | none             | 4.8       |              | SyBr green I/HRM Dye |
| Amplification | 95          | 0:00:10         | 45    | none             | 4.8       |              |                      |
|               | 60          | 0:00:10         |       | none             | 2.5       |              |                      |
|               | 72          | 0:00:10         |       | single           | 4.8       |              |                      |
| Melt          | 95          | 0:00:05         | 1     | none             | 4.8       |              |                      |
|               | 65          | 0:01:00         |       | none             | 2.5       |              |                      |
|               | 95          |                 |       | continuous       | 0.11      | 5/°C         |                      |
| Cool          | 40          | 0:00:10         | 1     | none             | 2.5       |              |                      |

**E. Analysis**

**Appendix 12**


---

Use Ab Quant/ 2<sup>nd</sup> derivative max in LightCycler 480 v 1.5 software to calculate the number of genomes per sample relative to the plasmid DNA standard curve or the amount of host cDNA in ng relative to the monkey gDNA standard. Use T<sub>m</sub> calling as a quality control to check whether the specific product was amplified.

Calculation of number of copies of viral genome/μL

= *Copy of virus genome as single strand cDNA relative to the copy number of plasmid DNA standard*

- *Calculation of genome copies and amount (μg) of host cDNA relative to the ng amount of host DNA standard*

This calculation assumes that the average weight of a bp of a double strand DNA is 620 g/mol, thus the molecular weight of DNA of 3 billion bps in a haploid cell is  $1.85 \times 10^{12}$  g/mol. The quantity of DNA in each cell contains  $(1.85 \times 10^{12} \text{ g/mol}) \times (1 \text{ mole} / 6.022 \times 10^{23} \text{ molecules}) \times 2 = 6 \text{ pg}$  of diploid DNA, so 1 pg of DNA contains 0.167 double strand copies = 0.334 single-stranded copies of DNA, and 1 ng = 334 single-stranded copies of DNA.

*ng\*334 (single stranded copies=genome)*

Number of monkey GAPDH genome copies =  $\frac{\text{ng*334 (single stranded copies=genome)}}{\text{dilution factor*2}}$

Conversion from ng/μL to μg/μL amount of host DNA = ng/μL of host DNA × 1000

- *Calculation of number of copies of Viral genomes normalized to number of copies of genome host*

$\frac{\text{Copies of viral genome}/\mu\text{L}}{\text{Copies of genome DNA in host}/\mu\text{L}}$

- *Calculation of number of copies of Viral genomes normalized to amount of host DNA host (μg)*

$\frac{\text{Copies of viral genome}/\mu\text{L}}{\text{amount of DNA in host } (\mu\text{g})/\mu\text{L}}$

### **6.1.7 Biodistribution qPCR Validation Studies.**

*Prepared by Yang Yu, UTSW Medical Center*

Version: **01-13-2022**

#### **A. Validation of pTRS-UsP-hAP4M1opt-BGHpA detection in no matrix.**

##### *Overview*

The plasmid, pTRS-UsP-hAP4M1opt-BGHpA, was used as a template in 2 SYBR reactions using the hAP4M1opt primer set 2 to validate PCR efficiency and lower detection threshold.

##### *Plasmid dilutions in no matrix*

The plasmid was diluted from  $1.59 \times 10^7$  copies to 1 copy, and 2 replicates of serial dilution were used in 2 independent runs (4 replicates total). The 2<sup>nd</sup> derivative max and fit points algorithm were applied to the analysis. T<sub>m</sub> analysis was used to determine PCR product purity, which is also confirmed by using agarose gel electrophoresis. Among all samples, 100% of replicates at or above 1 copy per reaction were successfully detected. Conservatively, we set the lower limit of detection (LLOD) at 4 copies of the plasmid per reaction. One out of 4 replicates amplified in the negative control, and it was detected as 1.36 copies, which is below the LLOD (4 copies) that was used for data analysis. The PCR amplification efficiency was between 1.916 and 1.935 using the 2<sup>nd</sup> derivative max algorithm.

**Appendix 12**

---

The variability (range) of the lower limit of quantitation (LLOQ) for detection of the AP4M1opt plasmid sequence was 11.1 to 20.8 copies detected with an input of 15.9 copies, 3.69 to 8.75 copies detected at 8 copies level, 2.2 to 8.47 copies at 4 copies, 1.06 to 4.78 at 2 copies, and 0.984 to 2.22 copies at 1 copy level in SYBR reaction with AP4M1opt primer set 2.

*Results*

Our qPCR validation studies detected the plasmid pTRS-USP-hAP4M1opt-BGHPA, LLOD, and LLOQ when plasmid DNA alone was measured. Overall, our LLOD was 100% successful in the detection of 4 copies of AP4M1opt per reaction.

**B. Validation of pTRS-USP-hAP4M1opt-BGHPA in a monkey genomic DNA matrix.***Overview*

The plasmid, pTRS-USP-hAP4M1opt-BGHPA, together with a matrix of monkey genomic DNA, were used as a template in 2 SYBR reactions using the hAP4M1opt primer set 2 to validate PCR efficiency and lower detection threshold.

*Plasmid dilutions in gDNA matrix*

The plasmid was diluted from  $1.59 \times 10^7$  copies to 1 copy, and 2 replicates of serial dilution were used in 2 independent runs (4 replicates total). All the dilutions were carried out in a matrix of 100 ng monkey genomic DNA. The 2<sup>nd</sup> derivative max and fit points algorithm were applied to the analysis.  $T_m$  analysis was used to determine PCR product purity, which is also confirmed by using agarose gel electrophoresis. For these results, minor background amplification was detected above a background signal. Among all reactions, 100% of replicates at or above 1 copy per reaction were successfully detected. Conservatively, the LLOD was set at 4 copies of plasmid per reaction. The efficiency was between 1.938 and 1.946 using the 2<sup>nd</sup> derivative max algorithm.

The variability (range) of the LLOQ for detection of the AP4M1opt plasmid sequence in the matrix of 100 ng monkey genomic DNA was 10.2 to 18.9 copies detected with an input of 15.9 copies, 5.31 to 6.93 copies detected at 8 copies level, 3.32 to 9.03 copies at 4 copies, 1.65 to 14.5 at 2 copies, and 0.0437 to 4.92 copies at 1 copy level in SYBR reaction with AP4M1opt primer set 2.

*Results*

Our qPCR validation studies detected the plasmid pTRS-USP-hAP4M1opt-BGHPA at comparable efficiencies, LLOD, and LLOQ regardless of whether plasmid DNA alone was measured, or the plasmid DNA was detected in a matrix of monkey genomic DNA. In the data analysis of the actual samples that were run, any values below the threshold were considered as too low to call and thus excluded. Overall, our LLOD was 100% successful in the detection of 4 copies of AP4M1opt sequence in 100 ng of monkey genomic DNA (40 copies/ug), which conforms to the Food and Drug Administration (FDA) guidelines on conducting vector genome biodistribution studies. This plasmid is our production plasmid to make the proposed clinical vector

**Appendix 12**

scAAV9/AP4M1opt. We conclude that these PCR conditions can be used to detect the copies of AP4M1opt viral genome in monkey genomic DNA samples.

**6.1.8 ELISpot Using CTL Test Kits.**

*Prepared by Kathryn McMillan, UTSW Medical Center*

Version:1.2

**A. DAY 0 Protocol (Sterile conditions)**

1. Prepare Capture Solution: 40uL of anti-IFN $\gamma$  capture solution is added to 10 mL of Diluent A.
2. 80uL of prepared solution is added to each well
3. Incubate plate overnight at 4°C in a fridge

**B. DAY 1 Protocol (Sterile conditions)****Plate setting**

|   | 1        | 2 | 3 | 4 | 5 | 6         | 7 | 8 | 9 | 10 | 11                              | 12 |
|---|----------|---|---|---|---|-----------|---|---|---|----|---------------------------------|----|
| A | Sample 1 |   |   |   |   | Sample 9  |   |   |   |    | Cells-No Peptide Control        |    |
| B | Sample 2 |   |   |   |   | Sample 10 |   |   |   |    |                                 |    |
| C | Sample 3 |   |   |   |   | Sample 11 |   |   |   |    | Cells + Stim. Control           |    |
| D | Sample 4 |   |   |   |   | Sample 12 |   |   |   |    |                                 |    |
| E | Sample 5 |   |   |   |   | Sample 13 |   |   |   |    | No cells + IFN $\gamma$ Control |    |
| F | Sample 6 |   |   |   |   | Sample 14 |   |   |   |    |                                 |    |
| G | Sample 7 |   |   |   |   | Sample 15 |   |   |   |    | No cells Control                |    |
| H | Sample 8 |   |   |   |   | Sample 16 |   |   |   |    |                                 |    |

Wells with peptide Add DMSO to make sure same conc. of DMSO with other wells

**\*\*\*All work done in designated NHP hood or in NHP designated equipment\*\*\***

1. On dry ice, pull out frozen splenocytes/lymphocytes samples
2. Thaw the cells one at a time in water bath setup in 37°C incubator
3. Prepare 15ml tube with enough media to do a 1:10 dilution of your sample
  - a. ex. 1ml of frozen cell + 9ml of media
4. Centrifuge at 330g for 5min at room temperature
5. Aspirate the media and resuspend pellet with 1ml of new media
  - a. Helpful to set pipette to 250uL for resuspension
6. Prepare cell suspensions for counting: 10ul Cells + 90ul Trypan Blue in round bottom plates. Load 10uL into hemocytometer and count:
  - a. Ex. 1

| Cells Counted: | Current Conc. : | Desired Conc. : | Total Volume: |
|----------------|-----------------|-----------------|---------------|
| 42             | 4.2E6/mL        | 2.0E6/mL        | 2.1mL         |

b. Ex. 2

| Cells Counted: | Current Conc. : | Desired Conc. : | Total Volume: |
|----------------|-----------------|-----------------|---------------|
| 15             | 1.5E6/mL        | 2.0E6/mL        | 0.75mL        |

c. In Ex. 1, you should add enough media to cell suspension for a total volume of 2.1 mL

**Appendix 12**

- 
- d. In Ex. 2, you should repeat steps 4 and 5 and resuspend in the calculated total volume  $\leq 1\text{mL}$ .
  7. Prepare Peptide mix
    - a. Peptide Pool: 10 mL media + calculated peptide from stock. Desired: 1ug/100uL/well
    - b. Ex. Peptide pool conc: 1.4mg/mL
      - i.  $0.1\text{mg} / 1.4\text{mg/mL} \times 1000 = 71.4 \text{ ul stock peptide in 10ml media}$
    - c. Calculate DMSO conc. of peptide mix:
    - d. Ex.:  $71.4\text{uL stock} / 10,000\text{ul} \times 100 = 0.714\% \text{ DMSO}$  (match this % in all samples)
      - i. Ex.:  $71.4\text{uL stock} / 10,000\text{ul} \times 100 = 0.714\% \text{ DMSO}$  (match this % in all samples)
  8. Prepare Positive/Negative controls:
    - a. Cells + No Peptide group: 400ul of media + (0.714% DMSO from step 7)
      - i. Ex:  $400\text{uL} \times 0.714\% = 2.86\text{uL DMSO}$
    - b. Cells + Stim. group: 400ul of media + (0.714% DMSO from step 7) + 0.8ul of P+I Stimulation Cocktail
      - i. Ex:  $400\text{uL} \times 0.714\% = 2.86\text{uL DMSO}$
    - c. No cells + IFN $\gamma$  group: 400ul media + 10uL IFN $\gamma$  aliquot prepped ahead of time
    - d. No cells group: 400ul of media
  9. Aspirate the D0 Capture solution from the plate
  10. Load 150uL 1 $\times$  D-PBS, aspirate off.
  11. Load 100uL of cells into plates according to layout. Pool remaining cell suspensions for control wells
  12. To Cells-No Peptide control wells, add 100uL of cell pool + 100uL of prepared control from step 8a
  13. To Cells + Stim. control wells, add 100uL of cell pool + 100uL of prepared control from step 8b
  14. To No Cells + IFN $\gamma$  control wells, add 100uL of IFN $\gamma$  solution from step 8c + 100uL of peptide mix
  15. To No Cells control wells, add 100uL media + 100uL of peptide mix
  16. Add 100ul of Peptide mix into remaining experimental wells. ALL WELLS SHOULD BE AT 200uL
  17. Wrap in foil, incubate it for 24hr at 37°C with 5-7% CO $_2$

**C. Day 2 Protocol (Sterile conditions)**

**\*\*\*All work done in designated NHP hood or in NHP designated equipment\*\*\***

1. Prepare Wash Solutions for the day: 1x PBS, distilled water and 1 $\times$  Tween-PBS 0.05%.
2. Prepare Detection Solution by diluting Detection Antibody according to your specific protocol.
  - a. Given protocol: 40 ul of anti-IFN $\gamma$  Biotinylated Antibody + 10mL Diluent B
  - b. Prep just before use. Can hold final wash in wells to prepare, then aspirate and load
3. Wash plate two times with PBS and then two times with 0.05% Tween-PBS, 200 $\mu\text{L}$ /well each time.
  - a. Plate is considered non-hazardous after PBS-T washes since the Tween-20 will disrupt the viral envelope
4. Add 80 $\mu\text{L}$ /well Detection Solution. Incubate at RT, 2h.
5. Prepare Tertiary Solution by diluting the Tertiary Antibody according to your specific protocol.
  - a. Given protocol: 10uL Streptavidin supplied by kit + 10mL of diluent C
  - b. Prep just before use. Can hold final wash in wells to prepare, then aspirate and load
6. Wash plate three times with 0.05% Tween-PBS, 200 $\mu\text{L}$ /well.
7. Add 80 $\mu\text{L}$ /well of Strep-AP Solution. Incubate at RT, 30min.
8. Prepare Developer Solution according to your specific protocol.

**Appendix 12**

- a. Given protocol: To 10mL of Diluent Blue, add 160uL of S1, mix by inversion 4×. Add 160uL S2, mix by inversion 4×. Add 93uL S3, mix by inversion. Wrap tube in foil to protect from light. **SOLUTION ORDER IS CRITICAL!**
- b. Prep just before use. Can hold final wash in wells to prepare, then aspirate and load
9. Wash plate two times with 0.05% Tween-PBS, and then two times with distilled water, 200µl/well each time.
10. Add Developer Solution, 80µl/well. Incubate at RT, 15 min.
11. Stop reaction by gently rinsing membrane with tap water, decant, and repeat three times. Remove protective underdrain of the plate and rinse back of plate with tap water. Air dry plate for 2 hours face-down in running hood or on paper towels for 24 hours on bench top.
12. Scan and count plate.

**7. APPENDICES****7.1 Raw Data****Table 2. Raw data vg/NHP diploid genome**

|      | Br-1   | Br-2   | Br-3   | Br-4   | Br-5   | Br-6   | Br-7   | Br-8    | Br-9   | Br-10  |
|------|--------|--------|--------|--------|--------|--------|--------|---------|--------|--------|
| 1201 |        | 0.0023 |        | 0.0007 | 0.1129 | 0.0279 | 0.0716 |         | 0.0478 | 0.0192 |
| 1701 | 0.0003 | 0.0003 | 0.0128 |        | 0.0002 | 0.0001 | 0.0168 | 0.0009  |        |        |
| 2701 | 0.0308 | 0.0359 | 0.0055 | 0.0046 | 0.2968 | 0.4889 | 0.0069 |         | 0.0131 | 0.0151 |
| 2702 | 0.0357 | 0.6364 | 0.0108 | 0.0085 | 0.1047 | 0.2050 | 0.5469 | 0.0174  | 0.0328 | 0.0202 |
| 3201 |        | 1.6917 | 0.1040 | 0.3734 | 0.0046 |        | 0.2270 | 2.0207  | 0.3665 | 0.3546 |
| 3701 |        | 0.1520 | 2.6114 | 0.1710 | 0.0107 |        | 2.2089 | 12.1331 | 0.7280 | 0.2603 |

|      | Br-11  | Br-12  | Br-13  | Br-14  | Br-15  | Br-16  | Br-17  | Br-18  | Br-19  | Br-20  |
|------|--------|--------|--------|--------|--------|--------|--------|--------|--------|--------|
| 1201 |        |        | 0.0051 | 0.0507 | 0.0002 | 0.0002 |        | 0.0073 | 0.0056 | 0.0063 |
| 1701 | 0.0011 |        |        | 0.0138 |        | 0.0002 | 0.0002 |        | 0.0000 |        |
| 2701 | 0.0362 | 0.6462 | 0.1302 | 0.2286 | 0.0503 | 0.0201 | 0.0535 | 0.0944 | 0.0073 | 0.1813 |
| 2702 | 0.0164 | 0.1489 | 0.4404 | 0.0144 | 0.0101 | 0.0083 | 0.0146 | 0.0119 | 0.0162 | 0.0042 |
| 3201 | 0.0021 | 1.7471 | 1.8765 | 0.0739 | 0.0511 | 0.0120 |        | 1.2634 | 7.3115 | 0.7319 |
| 3701 | 0.0072 |        |        |        | 0.7706 | 1.1426 | 0.0465 | 0.0264 | 0.0004 | 0.6108 |

|      | Br-21  | Br-22  | ON     | Trig   | SC-C   | SC-T   | SC-L   | DRG-C  | DRG- T | DRG-L  |
|------|--------|--------|--------|--------|--------|--------|--------|--------|--------|--------|
| 1201 | 0.0185 | 0.0005 | 0.0248 | 0.0013 |        | 0.0770 | 0.0442 |        |        |        |
| 1701 | 0.0006 | 0.0010 | 0.0183 | 0.0002 |        | 0.1061 | 0.0749 | 0.0728 | 0.0967 | 0.0992 |
| 2701 | 0.0058 | 0.0317 | 0.0558 | 0.5743 | 0.0080 | 0.1685 | 0.0143 | 1.0445 | 0.6618 | 0.2565 |
| 2702 | 0.0036 | 0.0876 | 0.0207 | 0.1183 | 0.0262 | 0.2680 | 0.0548 | 0.1739 | 0.1457 | 0.1660 |
| 3201 | 0.5047 | 0.0073 | 0.0369 | 5.2388 | 0.9126 | 0.3686 | 1.9214 | 0.7248 | 0.0837 | 1.4973 |
| 3701 | 0.2193 | 0.3703 | 0.0695 | 0.7046 | 0.9402 | 0.8284 |        | 0.6463 | 0.4195 | 0.2361 |

|  | Sc | Tib | H | Lu | Thy | Li | SPL | K | G | Bic | Gas |
|--|----|-----|---|----|-----|----|-----|---|---|-----|-----|
|--|----|-----|---|----|-----|----|-----|---|---|-----|-----|

**Appendix 12**

---

|      |        |        |        |        |        |         |        |        |        |        |        |
|------|--------|--------|--------|--------|--------|---------|--------|--------|--------|--------|--------|
| 1201 | 0.0002 | 0.0058 | 0.0010 | 0.0007 | 0.0000 | 0.0097  |        | 0.0007 | 0.0000 | 0.0002 | 0.0132 |
| 1701 |        | 0.0004 | 0.0001 | 0.0042 | 0.0001 | 0.0010  | 0.0021 | 0.0001 | 0.0001 | 0.0011 | 0.0004 |
| 2701 | 0.0025 | 0.0016 | 0.0107 | 0.0261 | 0.0003 | 3.0719  | 0.0110 | 0.0073 | 0.0013 | 0.0020 | 0.0130 |
| 2702 | 0.0034 | 0.0041 | 0.0282 | 0.0241 | 0.0010 | 7.6226  | 0.1780 | 0.0096 | 0.1291 | 0.0026 | 0.0030 |
| 3201 | 0.0071 | 0.0128 | 0.0685 | 0.1519 | 0.0289 | 61.4790 | 0.1192 | 0.0789 | 0.0082 | 0.0924 | 0.0305 |
| 3701 | 0.0034 | 0.0052 | 0.0005 | 0.0153 | 0.0000 | 1.0524  | 0.3672 | 0.0175 | 0.0010 | 0.0012 | 0.0014 |

**Appendix 12****Table 3. Raw data of expression: copies of AP4M1 per copy of GAPDH**

|      | Br-1    | Br-2    | Br-3    | Br-4    | Br-5    | Br-6    | Br-7    | Br-8    | Br-9    | Br-10   |
|------|---------|---------|---------|---------|---------|---------|---------|---------|---------|---------|
| 1201 | 0.00000 | 0.00000 | 0.00000 | 0.00000 | 0.00000 | 0.00000 | 0.00000 | 0.00000 | 0.00000 | 0.00001 |
| 1701 | 0.00000 | 0.00000 | 0.00002 | 0.00000 | 0.00000 | 0.00000 | 0.00000 | 0.00000 | 0.00000 | 0.00000 |
| 2701 | 0.00001 | 0.00003 | 0.00000 | 0.00000 | 0.00001 | 0.00005 | 0.00000 | 0.00002 | 0.01416 | 0.00037 |
| 2702 | 0.00001 | 0.00001 | 0.00001 | 0.00001 | 0.00002 | 0.00001 | 0.00000 | 0.00002 | 0.00007 | 0.00001 |
| 3201 | 0.00795 | 0.00394 | 0.00003 | 0.00002 | 0.02296 | 0.01594 | 0.00253 | 0.09336 | 0.00534 | 0.02763 |
| 3701 | 0.02072 | 0.01881 | 0.00002 | 0.00001 | 0.02398 | 0.02323 | 0.02872 | 0.06968 | 0.00068 | 0.05626 |

|      | Br-11   | Br-12   | Br-13   | Br-14   | Br-15   | Br-16   | Br-17   | Br-18   | Br-19   | Br-20   |
|------|---------|---------|---------|---------|---------|---------|---------|---------|---------|---------|
| 1201 | 0.00000 | 0.00001 | 0.00000 | 0.00000 | 0.00000 | 0.00000 | 0.00000 | 0.00000 | 0.00000 | 0.00000 |
| 1701 | 0.00000 | 0.00000 | 0.00000 | 0.00000 | 0.00000 | 0.00000 | 0.00000 | 0.00000 | 0.00000 | 0.00000 |
| 2701 | 0.00005 | 0.00016 | 0.00021 | 0.00022 | 0.00001 | 0.00000 | 0.00003 | 0.00000 | 0.00003 | 0.00023 |
| 2702 | 0.00000 | 0.00168 | 0.00016 | 0.00006 | 0.00004 | 0.00001 | 0.00121 | 0.00006 | 0.00036 | 0.00084 |
| 3201 | 0.00175 | 0.01307 | 0.00590 | 0.00775 | 0.00442 | 0.00488 | 0.00673 | 0.00146 | 0.00347 | 0.00267 |
| 3701 | 0.00068 | 0.00031 | 0.00130 | 0.01024 | 0.01096 | 0.00073 | 0.02231 | 0.00133 | 0.00375 | 0.00146 |

|      | Br-21   | Br-22   | ON      | Trig    | SC-C    | SC-T    | SC-L    | DRG-C   | DRG- T  | DRG-L   |
|------|---------|---------|---------|---------|---------|---------|---------|---------|---------|---------|
| 1201 | 0.00006 | 0.00000 | 0.00002 | 0.00000 | 0.00000 | 0.00000 | 0.02568 | 0.00003 | 0.00000 | 0.00000 |
| 1701 | 0.00000 | 0.00000 | 0.00001 | 0.00000 | 0.00000 | 0.00000 | 0.00000 | 0.00000 | 0.00000 | 0.00000 |
| 2701 | 0.00000 | 0.00008 | 0.00000 | 0.00046 | 0.00420 | 0.00033 | 0.00000 | 0.01284 | 0.00067 | 0.00075 |
| 2702 | 0.00001 | 0.00001 | 0.00001 | 0.00005 | 0.00028 | 0.00006 | 0.00071 | 0.01797 | 0.00107 | 0.00160 |
| 3201 | 0.00953 | 0.00883 | 0.00516 | 0.02011 | 0.02327 | 0.00033 | 0.02932 | 0.12872 | 0.06706 | 0.02010 |
| 3701 | 0.00572 | 0.01796 | 0.00052 | 0.00006 | 0.01652 | 0.15000 | 0.08312 | 0.00000 | 0.00778 |         |

|      | Sc      | Tib     | H       | Lu      | Thy     | Li      | SPL     | K       | G       | Bic     | Gas     |
|------|---------|---------|---------|---------|---------|---------|---------|---------|---------|---------|---------|
| 1201 | 0.00001 | 0.00000 | 0.00000 | 0.00000 | 0.00000 | 0.00000 | 0.00000 | 0.00000 | 0.00000 | 0.00000 | 0.00000 |
| 1701 | 0.00000 | 0.00000 | 0.00000 | 0.00001 | 0.00000 | 0.00000 | 0.00000 | 0.00000 | 0.00000 | 0.00000 | 0.00000 |
| 2701 | 0.00001 | 0.00005 | 0.00000 | 0.00000 | 0.00000 | 0.00212 | 0.00000 | 0.00002 | 0.00000 | 0.00000 | 0.00000 |
| 2702 | 0.00001 | 0.00000 | 0.00000 | 0.00000 | 0.00000 | 0.00192 | 0.00000 | 0.00000 | 0.00084 | 0.00000 | 0.00000 |
| 3201 | 0.00001 | 0.00001 | 0.00004 | 0.00000 | 0.00000 | 0.02520 | 0.00012 | 0.00000 | 0.00459 | 0.00001 | 0.00014 |
| 3701 | 0.00007 | 0.00000 | 0.00000 | 0.00000 | 0.00000 | 0.00001 | 0.00000 | 0.00000 | 0.00000 | 0.00000 | 0.00000 |

**Appendix 12****Table 4. Raw data of immune response: Spot# in ELISpot plate**

| ID   | Against AAV9 |   |   |   |   | Against AP4M1 |   |   |   |   | Negative Control | Positive Control |
|------|--------------|---|---|---|---|---------------|---|---|---|---|------------------|------------------|
| 1201 | 0            | 0 | 0 | 0 | 1 | 0             | 0 | 0 | 0 | 0 | 0                | 753              |
| 1701 | 0            | 0 | 0 | 0 | 0 | 0             | 0 | 1 | 0 | 0 | 0                | 552              |
| 2701 | 0            | 0 | 0 | 0 | 0 | 0             | 0 | 0 | 0 | 0 | 0                | 823              |
| 2702 | 0            | 0 | 0 | 0 | 0 | 2             | 1 | 0 | 3 | 3 | 0                | 1010             |
| 3201 | 0            | 0 | 0 | 0 | 0 | 0             | 0 | 0 | 0 | 0 | 0                | 850              |
| 3701 | 0            | 0 | 0 | 0 | 0 | 0             | 0 | 2 | 0 | 0 | 0                | 836              |
|      |              |   |   |   |   |               |   |   |   |   | 0                | 1295             |
|      |              |   |   |   |   |               |   |   |   |   | 0                | 1210             |

**7.2 Test Article Certificate of Analysis**

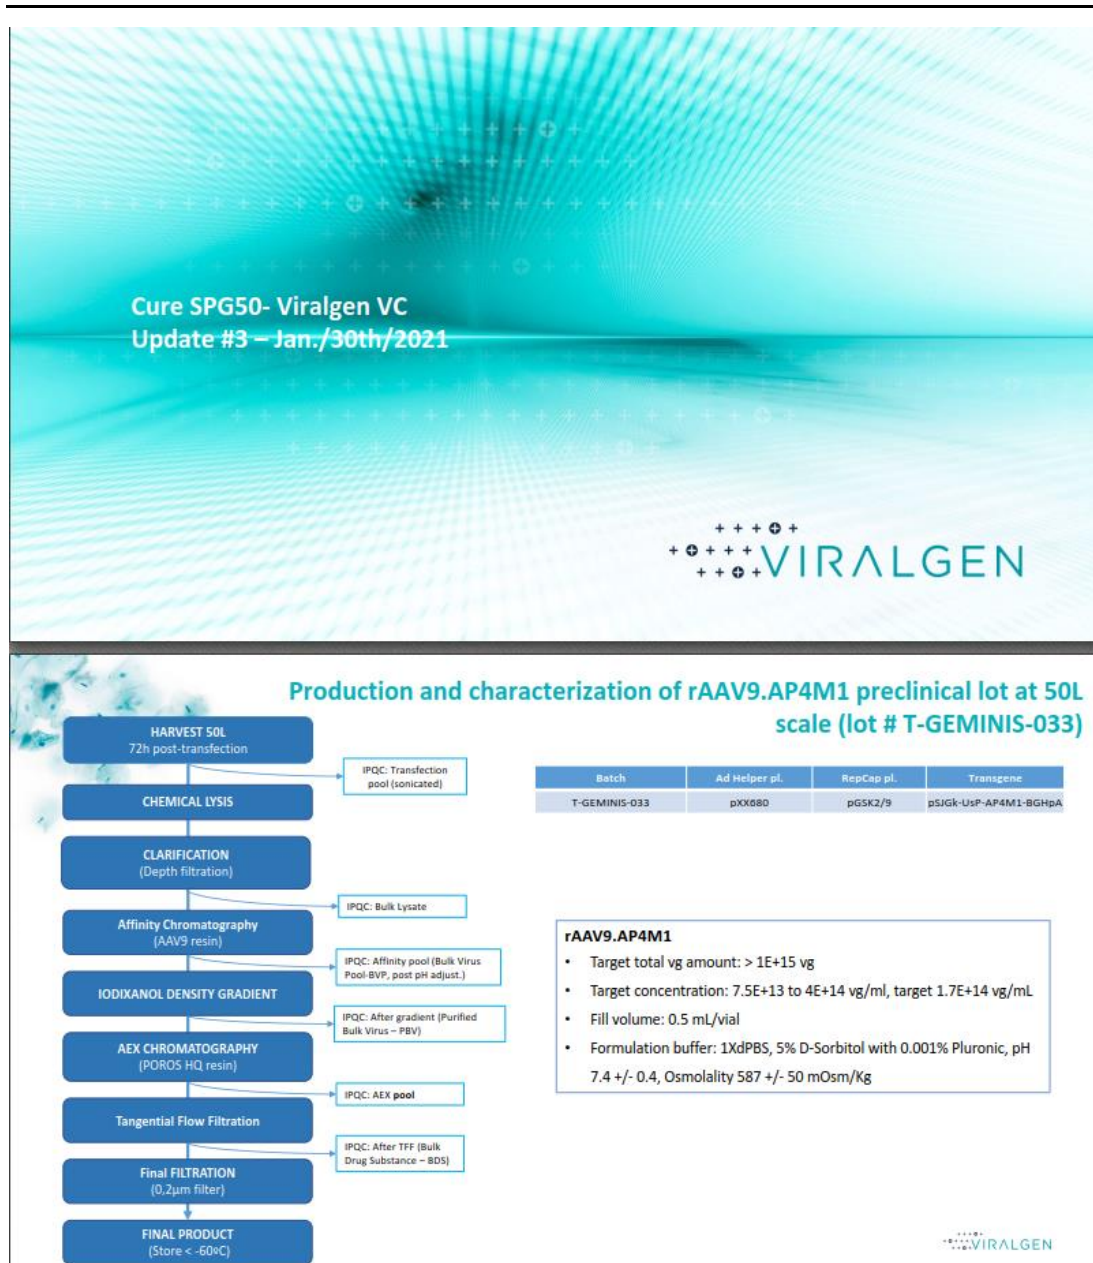

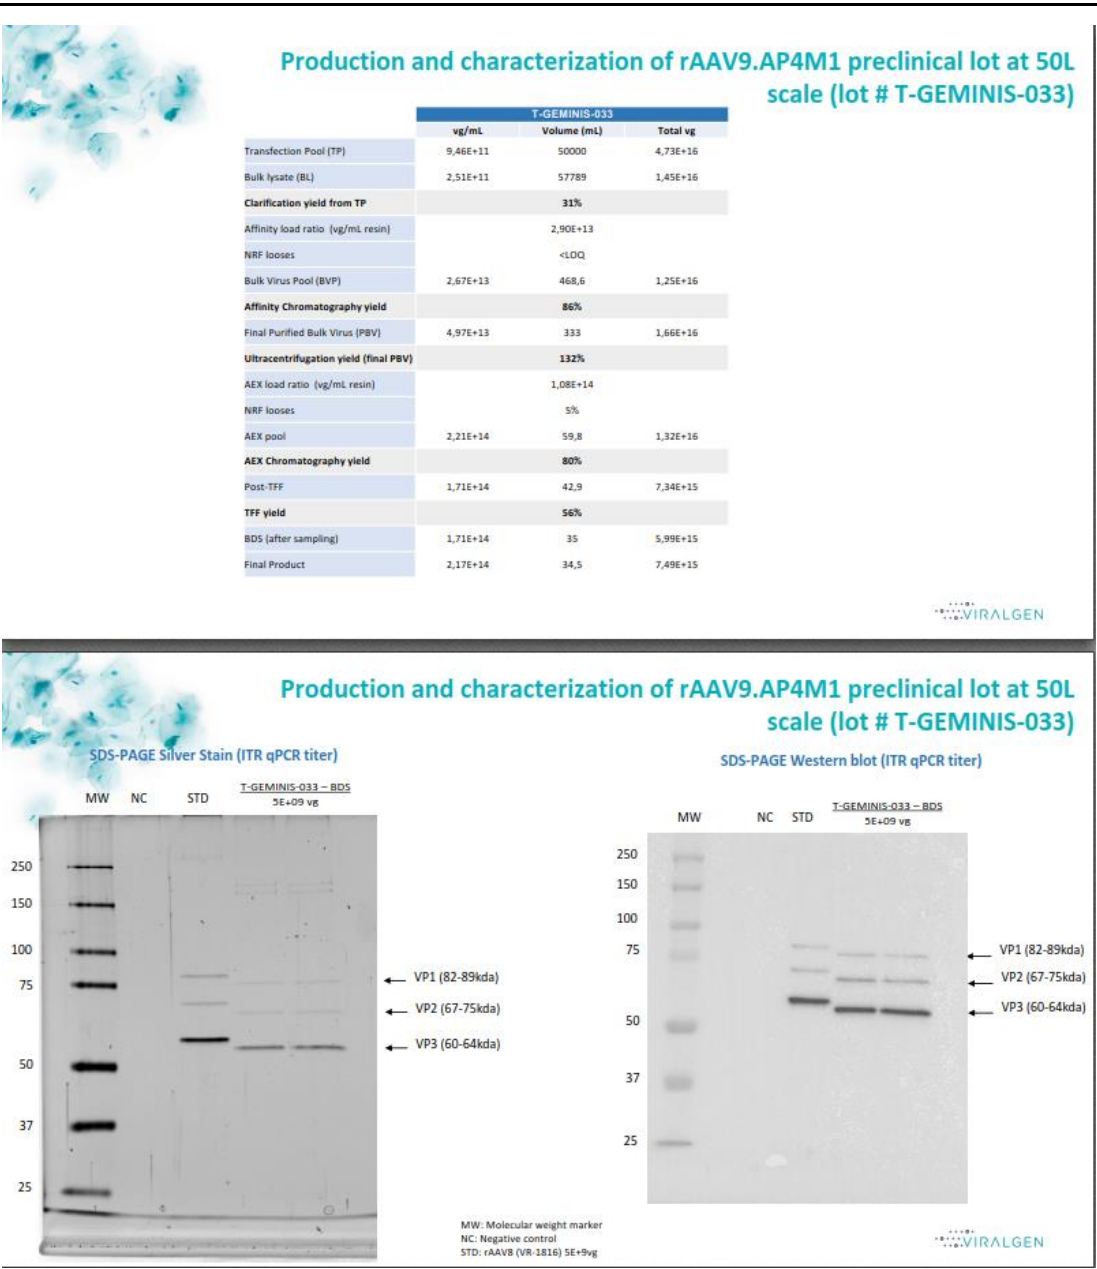

## Appendix 12

### Production and characterization of rAAV9.AP4M1 preclinical lot at 50L scale (lot # T-GEMINIS-033) – Drug substance

| Test                             | Method                                              | Specification | Result                                                                                                 |
|----------------------------------|-----------------------------------------------------|---------------|--------------------------------------------------------------------------------------------------------|
| <b>STRENGTH ASSAYS</b>           |                                                     |               |                                                                                                        |
| Vector genome titer (vg/mL)      | EP 2.6.21; USP<1127> ITR2 qPCR                      | > TBD vg/mL   | 1.71E+14                                                                                               |
| Vector genome titer (vg/mL)      | EP 2.6.21; USP<1127> ITR2 ddPCR                     | > TBD vg/mL   | 5.17E+13                                                                                               |
| <b>PURITY ASSAYS</b>             |                                                     |               |                                                                                                        |
| General purity                   | EP 2.2.31; USP<1056><br>SDS-PAGE / Silver staining  | Report result | Detection of VP1,VP2 and VP3.<br>Additional extra bands at 150-200 Kda                                 |
| Residual HCP                     | ELISA HEK293                                        | Report result | < 100 ng/mL                                                                                            |
| Residual Host Cell DNA (pg / mL) | EP 2.6.21; USP<1127><br>qPCR 18S (2 amplicon sizes) | Report result | 123bp<br>Dnase + : 6.86E+06<br>Dnase - : 7.38E+06<br>254bp<br>Dnase + : 5.02E+06<br>Dnase - : 5.21E+06 |
| Residual Host Cell DNA (pg/mL)   | EP 2.6.21; USP<1127><br>qPCR E1A                    | Report result | On-going                                                                                               |
| Residual Plasmid DNA (copies/mL) | EP 2.6.21; USP<1127><br>qPCR Antibiotic-R           | Report result | Dnase + : 9.61E+11<br>Dnase - : 1.26E+12                                                               |
| Full/Empty particles ratio       | NS/Cryo-TEM                                         | >50% full     | On-going                                                                                               |

VIRALGEN

### Production and characterization of rAAV9.AP4M1 preclinical lot at 50L scale (lot # T-GEMINIS-033) – Drug substance

| Test                           | Method                                 | Specification                         | Result                       |
|--------------------------------|----------------------------------------|---------------------------------------|------------------------------|
| <b>PURITY ASSAYS</b>           |                                        |                                       |                              |
| Aggregation                    | nsTEM                                  | Report result                         | On-going                     |
| Residual cells lysis reagent   | HPLC                                   | Report result                         | <LOD (1 ppm)                 |
| Residual clarifying reagent    | HPLC                                   | Report result                         | >0.21 ppm and <1.03ppm       |
| Residual transfection reagent  | HPLC                                   | Report result                         | >12.57 ppm and <25.13 ppm    |
| Residual Iodixanol             | HPLC                                   | Report result                         | >1.04 ppm and <3.12 ppm      |
| Residual antifoam              | ICP-OES                                | Report result                         | <LOD (5 ppm)                 |
| Residual Immunoaffinity ligand | ELISA                                  | Report result                         | 497.58 ng/mL                 |
| rcAAV                          | Infection of permissive cell line/qPCR | Report result                         | On-going                     |
| <b>IDENTITY ASSAYS</b>         |                                        |                                       |                              |
| Protein Identity               | SDS-PAGE/Western Blot                  | Detection of VP1, VP2 and VP3         | Detection of VP1,VP2 and VP3 |
| Genome identity                | Sequencing                             | 100% conform to sequence of reference | On-going                     |

VIRALGEN

## Appendix 12

### Production and characterization of rAAV9.AP4M1 preclinical lot at 50L scale (lot # T-GEMINIS-033) – **Drug product**

| Test                                      | Method                             | Specification                                                      | Result                                   |
|-------------------------------------------|------------------------------------|--------------------------------------------------------------------|------------------------------------------|
| <b>SAFETY ASSAYS</b>                      |                                    |                                                                    |                                          |
| Sterility                                 | EP 2.6.1; USP<71>                  | No growth                                                          | No growth                                |
| Endotoxin (LAL kinetic chromogenic assay) | EP 2.6.14; USP<85>                 | < 0.2 EU / mL                                                      | 0,123 EU/mL                              |
| <b>STRENGTH ASSAYS</b>                    |                                    |                                                                    |                                          |
| Vector genome titer (vg/mL)               | EP 2.6.21; USP<1127><br>ITR2 qPCR  | 7.5E13 to 4E14 vg/mL,<br>targeting 1.7E14 vg/mL                    | 2,17E+14                                 |
| Vector genome titer (vg/mL)               | EP 2.6.21; USP<1127><br>ITR2 ddPCR | Report result                                                      | 5,43E+13                                 |
| Infectious particles titer (TCID50/mL)    | TCID50                             | Report result                                                      | 1,02E+10                                 |
| VG/IP ratio                               | -                                  | -                                                                  | 2,1E+04                                  |
| TEA/BAA                                   | CURE SPG50                         | To be reported by CURE SPG50                                       | TBD                                      |
| <b>QUALITY ASSAYS</b>                     |                                    |                                                                    |                                          |
| Osmolality (mOsm/Kg)                      | EP 2.2.35; USP<785>                | 587 +/-50 mOsm/Kg                                                  | 570.33                                   |
| pH                                        | EP 2.2.3; USP<791>                 | 7.4±0.4                                                            | 7.21                                     |
| Appearance                                | Visual inspection                  | Colorless, clear to slightly opalescent, free of visible particles | Not done – DP vialled in opaque PP vials |
| Particle size distribution                | DLS                                | Report result                                                      | On-going                                 |

VIRALGEN

### Production and characterization of rAAV9.AP4M1 preclinical lot at 50L scale (lot # T-GEMINIS-033)

Final filling T-GEMINIS-033 -&gt; December 22nd, 2020

- Fill volume: nominal volume 0.5 mL/vial -> actual 0.65 mL/vial
- Filled vials:
  - 69 x 0.5 mL
  - 1 x 0.04 mL
- Shipment to UTSW on January 19th, 2021

| FINAL PRODUCT - Sampling plan                         | Actual vials       |
|-------------------------------------------------------|--------------------|
| DP characterization                                   | 2 x 0.5 mL         |
| Sterility                                             | 2 x 0.5 mL         |
| Retention                                             | 2 x 0.5 mL         |
| Reference for GMP lot                                 | 2x 0.5 mL          |
| Stability study                                       | 27 x 0.5 mL        |
| <b>TOTAL QC</b>                                       | <b>35 x 0.5 mL</b> |
| <b>Final amount of vials available for CURE SPG50</b> | <b>34 x 0.5 mL</b> |

VIRALGEN



**FINAL REPORT**

**Study Phase: Pathology**

**Test Facility Study No. 5550014**

**Sponsor Reference No. UTSW-Gray-SPG50-004**

**GLP**

**TEST FACILITY:**

Charles River Laboratories Montreal ULC  
Senneville Site (CR-SEN)

**Appendix 13****TABLE OF CONTENTS**

|                                                   |    |
|---------------------------------------------------|----|
| LIST OF APPENDICES.....                           | 3  |
| 1. SUMMARY .....                                  | 4  |
| 2. INTRODUCTION .....                             | 5  |
| 3. MATERIALS AND METHODS.....                     | 5  |
| 3.1. Computerized Systems .....                   | 6  |
| 4. RESULTS AND DISCUSSIONS.....                   | 6  |
| 4.1. Mortality .....                              | 6  |
| 4.2. Gross Pathology .....                        | 6  |
| 4.2.1. Terminal Euthanasia Animals (Day 94) ..... | 6  |
| 4.3. Organ Weights .....                          | 7  |
| 4.3.1. Terminal Euthanasia Animals (Day 94) ..... | 7  |
| 4.4. Histopathology.....                          | 7  |
| 4.4.1. Terminal Euthanasia Animals (Day 94) ..... | 7  |
| 5. CONCLUSIONS.....                               | 13 |
| 6. REPORT APPROVAL .....                          | 14 |

**Appendix 13**

**LIST OF APPENDICES**

|            |                                                         |    |
|------------|---------------------------------------------------------|----|
| Appendix 1 | Individual Absolute Organ Weights.....                  | 16 |
| Appendix 2 | Individual Organ Weights Relative to Body Weight .....  | 26 |
| Appendix 3 | Individual Organ Weights Relative to Brain Weight ..... | 36 |
| Appendix 4 | Individual Macroscopic and Microscopic Pathology .....  | 46 |
| Appendix 5 | Historical Data.....                                    | 58 |

**Appendix 13****1. SUMMARY**

The objectives of this study were to determine the potential toxicity, biodistribution, and gene expression of AAV9/AP4M1, when given by a single intrathecal injection to monkeys, to evaluate the potential reversibility and/or progression of any findings, and to determine the potential impact of immunosuppressant (IMS) on the toxicity profile of this AAV9 vector.

One monkey per sex/group was assigned to the control group (reference item: PBS) or the high dose group (AAV9/AP4M1 at  $1.68 \times 10^{14}$  vg), and two female animals were assigned to the low dose group (AAV9/AP4M1 at  $8.4 \times 10^{13}$  vg). On Day 94, a complete gross pathological examination was performed and organ weights were recorded. A microscopic evaluation, was performed on selected tissues only (brain, spinal cord [cervical, thoracic, lumbar, including the injection site], dorsal root ganglia [cervical, thoracic, lumbar, with dorsal and ventral nerve roots], trigeminal ganglion, draining lymph nodes [deep cervical and iliac], liver, spleen, kidney, heart, skeletal muscle [gastrocnemius and biceps femoris], and nerves [optic, sciatic, sural, and tibial]).

The single intrathecal injection (slow bolus) of AAV9/AP4M1 to male and female monkeys at doses of  $8.4 \times 10^{13}$  or  $1.68 \times 10^{14}$  vg followed by a 93-day observation period resulted in pathological microscopic findings in the spinal cord (all segments, including the injection site), lumbar dorsal root ganglion (DRG), lumbar and thoracic dorsal nerve roots, brain, trigeminal ganglion, and peripheral nerves (sciatic, sural, and tibial).

At the injection site, axonal degeneration of the cauda equina was seen at  $1.68 \times 10^{14}$  vg in both sexes, while axonal degeneration of the dorsal funiculus and perivascular vacuolation of macrophages were seen in the male only. Perivascular infiltrates of mononuclear cells were noted in females at  $\geq 8.4 \times 10^{13}$  vg.

In the spinal cord, axonal degeneration of the dorsal funiculus was seen in all three segments and considered AAV9/AP4M1-related at  $1.68 \times 10^{14}$  vg in both sexes.

In the lumbar DRG, mononuclear cell infiltrates occurred at  $\geq 8.4 \times 10^{13}$  vg in both sexes, and neuronal degeneration was seen at  $1.68 \times 10^{14}$  vg in both sexes. In the dorsal lumbar nerve root, there was axonal degeneration at  $1.68 \times 10^{14}$  vg in both sexes, and mononuclear cell infiltrates in females at  $\geq 8.4 \times 10^{13}$  vg. Mononuclear cell infiltrates also occurred in the dorsal thoracic nerve root in the male at  $1.68 \times 10^{14}$  vg.

In the brain, axonal degeneration of the medulla oblongata was noted in the male at  $1.68 \times 10^{14}$  vg, and there was an increase in the severity of meningeal mononuclear cell infiltrates in both females at  $8.4 \times 10^{13}$  vg.

In the trigeminal ganglion, there was axonal degeneration and mononuclear cell infiltrates in the male at  $1.68 \times 10^{14}$  vg.

In the peripheral nerves (sciatic, sural, and tibial), there was an increase in severity of axonal degeneration at  $1.68 \times 10^{14}$  vg in both sexes, compared to controls, most likely exacerbated by the

**Appendix 13**

edema/inflammation associated with experimental procedures (repetitive intramuscular injections).

Overall, there was an increase in the severity of axonal degeneration in the central and peripheral nervous system in animals at  $1.68 \times 10^{14}$  vg (severity up to moderate or marked), when compared to animals at  $8.4 \times 10^{13}$  vg (severity minimal or mild).

The results from the pathological evaluation of Fluoro-Jade B, IBA-1 and GFAP stained lumbar spinal cord (including injection site) and lumbar DRG sections generally paralleled/confirmed the results previously mentioned with H&E stained sections.

There were no preterminal deaths, organ weight changes or macroscopic findings related to the administration of AAV9/AP4M1.

**2. INTRODUCTION**

This report presents the pathology findings in monkeys assigned to Study No. 5550014. The objectives of this study were to determine the potential toxicity, biodistribution, and gene expression of AAV9/AP4M1, for the treatment of Spastic Paraplegia Type 50 (SPG50) caused by the AP4M1 gene mutation, when given by a single intrathecal injection to monkeys, to evaluate the potential reversibility and/or progression of any findings, and to determine the potential impact of immunosuppressant (IMS) on the toxicity profile of this AAV9 vector.

**3. MATERIALS AND METHODS**

Experimental procedures applicable to pathology investigations are summarized in [Text Table 1](#).

Text Table 1  
Experimental Design

| Group No. | Test Material  | Dose Level (vg)       | Dose Volume (mL) | Dose Concentration (vg/mL) | No. of Animals |         |
|-----------|----------------|-----------------------|------------------|----------------------------|----------------|---------|
|           |                |                       |                  |                            | Main Study     |         |
|           |                |                       |                  |                            | Males          | Females |
| 1         | Reference Item | 0                     | 1                | 0                          | 1              | 1       |
| 2         | AAV9/AP4M1     | $8.4 \times 10^{13}$  | 1.55             | $5.43 \times 10^{13}$      | -              | 2       |
| 3         | AAV9/AP4M1     | $1.68 \times 10^{14}$ | 3.10             | $5.43 \times 10^{13}$      | 1              | 1       |

In addition to the administration of AAV9/AP4M1, each main study animal received immunosuppressant material consisting of a single intravenous infusion of methylprednisolone succinate on Day 1, a daily intramuscular injection of methylprednisolone acetate from Day 1 to 93, and a twice daily intramuscular injection of rapamycin from Day -12 to 93 (see Main Report for additional details). Each intramuscular injection was performed in the lateral compartment of the thigh.

A complete gross pathological examination was performed on Day 94 on all main study animals and organ weights were recorded, as specified in the Study Plan. A microscopic evaluation was performed on hematoxylin and eosin (H&E) slides of selected tissues which consisted of: brain, spinal cord (cervical, thoracic, lumbar, including the injection site), dorsal root ganglia (DRG: cervical, thoracic, lumbar, with dorsal and ventral nerve roots), trigeminal ganglion, draining

**Appendix 13**

lymph nodes (deep cervical and iliac), liver, spleen, kidney, heart, skeletal muscle (gastrocnemius and biceps femoris), and nerves (optic, sciatic, sural, and tibial). IBA-1, GFAP (glial fibrillary acidic protein) and Fluoro-Jade B staining were performed on the lumbar spinal cord (including the injection site) and the lumbar DRGs (including nerve roots) for all animals. Tissues that were supposed to be microscopically evaluated per study plan but were not available on the slide (and therefore not evaluated) are listed in the Individual Animal Data of the pathology report as not present. There was one missing tissue that did not affect the outcome or interpretation of the pathology portion of the study based on its single occurrence. Additional details along with deviations from these procedures may be found in the main study report.

**3.1. Computerized Systems**

Critical computerized systems used in this study phase are listed in [Text Table 2](#).

Text Table 2  
Computerized Systems

| System Name | Version No. | Description of Data Collected and/or Analyzed                                                                          |
|-------------|-------------|------------------------------------------------------------------------------------------------------------------------|
| Provantis®  | 10          | Terminal body weight, organ weight data, gross pathology and histopathology.<br>Analyses of numerical terminal data.   |
| M-Files®    | 21          | Reporting and collection of 21 CFR Part 11 compliant signature                                                         |
| Einfotree   | 7.6.0       | Excel Module for collection of 21 CFR Part 11 compliance requirements, security, audit trail and electronic signatures |

**4. RESULTS AND DISCUSSIONS****4.1. Mortality**

There were no unscheduled deaths during the course of this study.

**4.2. Gross Pathology****4.2.1. Terminal Euthanasia Animals (Day 94)**

([Appendix 4](#))

No AAV9/AP4M1-related gross findings were noted. The gross findings observed were considered incidental, related to experimental procedures/immunosuppressant administration, of the nature commonly observed in this strain and age of monkeys, and/or were of similar incidence in control and treated animals and, therefore, were considered unrelated to the administration of AAV9/AP4M1.

These included the small thymuses that were observed with a similar incidence across dose groups, including controls, and considered secondary to the administration of immunosuppressants and unrelated to the administration of AAV9/AP4M1. Furthermore, the macroscopic findings noted in the biceps femoris (swelling, thickness, dark/pale foci, and/or mottled discoloration) were seen with a similar incidence across dose groups, including controls,

**Appendix 13**

and were considered secondary to the repetitive procedure of intramuscular injection in the thigh, and unrelated to the administration of AAV9/AP4M1.

**4.3. Organ Weights****4.3.1. Terminal Euthanasia Animals (Day 94)**

([Appendix 1](#), [Appendix 2](#), and [Appendix 3](#))

No AAV9/AP4M1-related organ weight changes were noted. There were isolated organ weight values that were different from their respective controls. There were, however, no patterns, trends, or correlating data to suggest these values were toxicologically relevant. Thus, the organ weight differences observed were considered incidental, related to experimental procedures/immunosuppressant administration, and/or related to difference of sexual maturity and unrelated to the administration of AAV9/AP4M1.

These included decreases in thymus weight (absolute or relative to body and brain weight), when compared to organ weight historical data at the Test Facility ([Appendix 5](#)), that were observed with a similar magnitude across dose groups, including control, and were considered secondary to the administration of immunosuppressants, and unrelated to the administration of AAV9/AP4M1.

**4.4. Histopathology****4.4.1. Terminal Euthanasia Animals (Day 94)**

([Appendix 4](#))

AAV9/AP4M1-related microscopic findings occurred in the spinal cord (all segments, including the injection site), lumbar DRG, lumbar and thoracic dorsal nerve roots, brain, trigeminal ganglion, and peripheral nerves (sciatic, sural, and tibial), and are summarized in [Text Table 3](#) (H&E sections) and [Text Table 4](#) (Fluoro-Jade B, IBA-1 and GFAP stains).

**Appendix 13**

Text Table 3  
Summary of Microscopic Findings (H&E) – Scheduled Euthanasia (Day 94)

|                                                    | Males            |                       | Females |                      |                       |
|----------------------------------------------------|------------------|-----------------------|---------|----------------------|-----------------------|
|                                                    | Group 1          | Group 3               | 1       | 2                    | 3                     |
|                                                    | Dose (vg)        | 1.68x10 <sup>14</sup> | 0       | 8.4x10 <sup>13</sup> | 1.68x10 <sup>14</sup> |
| No. Animals per Group                              | 1                | 1                     | 1       | 2                    | 1                     |
| <b>Injection site (No. Examined)</b>               | 1                | 1                     | 1       | 2                    | 1                     |
| Degeneration; axonal, cauda equina                 | (0) <sup>a</sup> | (1)                   | (0)     | (0)                  | (1)                   |
| Moderate                                           | -                | 0                     | -       | -                    | 1                     |
| Marked                                             | -                | 1                     | -       | -                    | 0                     |
| Degeneration; axonal, dorsal funiculus             | (0)              | (1)                   | (0)     | (0)                  | (0)                   |
| Minimal                                            | -                | 1                     | -       | -                    | -                     |
| Vacuolation; perivascular, macrophage              | (0)              | (1)                   | (0)     | (0)                  | (0)                   |
| Mild                                               | -                | 1                     | -       | -                    | -                     |
| Infiltration, mononuclear cell; perivascular       | (0)              | (0)                   | (0)     | (1)                  | (1)                   |
| Minimal                                            | -                | -                     | -       | 1                    | 1                     |
| <b>Spinal cord, lumbar (No. Examined)</b>          | 1                | 1                     | 1       | 2                    | 1                     |
| Degeneration; axonal, dorsal funiculus             | (0)              | (1)                   | (1)     | (1)                  | (1)                   |
| Minimal                                            | -                | 0                     | 1       | 1                    | 0                     |
| Mild                                               | -                | 0                     | 0       | 0                    | 1                     |
| Moderate                                           | -                | 1                     | 0       | 0                    | 0                     |
| <b>Spinal cord, thoracic (No. Examined)</b>        | 1                | 1                     | 1       | 2                    | 1                     |
| Degeneration; axonal, dorsal funiculus             | (0)              | (1)                   | (0)     | (1)                  | (1)                   |
| Minimal                                            | -                | 0                     | -       | 1                    | 0                     |
| Mild                                               | -                | 0                     | -       | 0                    | 1                     |
| Moderate                                           | -                | 1                     | -       | 0                    | 0                     |
| <b>Spinal cord, cervical (No. Examined)</b>        | 1                | 1                     | 1       | 2                    | 1                     |
| Degeneration; axonal, dorsal funiculus             | (0)              | (1)                   | (0)     | (1)                  | (1)                   |
| Minimal                                            | -                | 0                     | -       | 1                    | 0                     |
| Mild                                               | -                | 1                     | -       | 0                    | 1                     |
| <b>DRG, lumbar (No. Examined)</b>                  | 1                | 1                     | 1       | 2                    | 1                     |
| Infiltration, mononuclear cell                     | (0)              | (1)                   | (0)     | (2)                  | (1)                   |
| Minimal                                            | -                | 1                     | -       | 2                    | 1                     |
| Degeneration; neuronal                             | (0)              | (1)                   | (0)     | (0)                  | (1)                   |
| Minimal                                            | -                | 1                     | -       | -                    | 1                     |
| <b>Nerve root, dorsal, lumbar (No. Examined)</b>   | 1                | 1                     | 1       | 2                    | 1                     |
| Degeneration; axonal                               | (0)              | (1)                   | (0)     | (0)                  | (1)                   |
| Minimal                                            | -                | 1                     | -       | -                    | 1                     |
| Infiltration, mononuclear cell                     | (0)              | (0)                   | (0)     | (1)                  | (1)                   |
| Minimal                                            | -                | -                     | -       | 1                    | 1                     |
| <b>Nerve root, dorsal, thoracic (No. Examined)</b> | 1                | 1                     | 1       | 2                    | 1                     |
| Infiltration, mononuclear cell                     | (0)              | (1)                   | (0)     | (0)                  | (0)                   |
| Minimal                                            | -                | 1                     | -       | -                    | -                     |
| <b>Brain (No. Examined)</b>                        | 1                | 1                     | 1       | 2                    | 1                     |
| Degeneration; axonal, medulla oblongata            | (0)              | (1)                   | (0)     | (0)                  | (0)                   |
| Minimal                                            | -                | 1                     | -       | -                    | -                     |
| Infiltration, mononuclear cell; meninges           | (1)              | (1)                   | (0)     | (2)                  | (1)                   |
| Minimal                                            | 1                | 1                     | -       | 0                    | 1                     |
| Mild                                               | 0                | 0                     | -       | 2                    | 0                     |

**Appendix 13**

|                                            | Males |                       | Females |                      |                       |
|--------------------------------------------|-------|-----------------------|---------|----------------------|-----------------------|
| Group                                      | 1     | 3                     | 1       | 2                    | 3                     |
| Dose (vg)                                  | 0     | 1.68x10 <sup>14</sup> | 0       | 8.4x10 <sup>13</sup> | 1.68x10 <sup>14</sup> |
| No. Animals per Group                      | 1     | 1                     | 1       | 2                    | 1                     |
| <b>Ganglion, trigeminal (No. Examined)</b> | 1     | 1                     | 1       | 2                    | 1                     |
| Degeneration; axonal                       | (0)   | (1)                   | (0)     | (0)                  | (0)                   |
| Minimal                                    | -     | 1                     | -       | -                    | -                     |
| Infiltration, mononuclear cell             | (0)   | (1)                   | (0)     | (0)                  | (0)                   |
| Minimal                                    | -     | 1                     | -       | -                    | -                     |
| <b>Nerve, sciatic (No. Examined)</b>       | 1     | 1                     | 1       | 2                    | 1                     |
| Degeneration; axonal                       | (1)   | (1)                   | (1)     | (2)                  | (1)                   |
| Minimal                                    | 1     | 0                     | 0       | 0                    | 0                     |
| Mild                                       | 0     | 1                     | 1       | 2                    | 0                     |
| Moderate                                   | 0     | 0                     | 0       | 0                    | 1                     |
| <b>Nerve, sural (No. Examined)</b>         | 1     | 1                     | 1       | 2                    | 1                     |
| Degeneration; axonal                       | (0)   | (1)                   | (0)     | (2)                  | (1)                   |
| Minimal                                    | -     | 0                     | -       | 2                    | 0                     |
| Mild                                       | -     | 1                     | -       | 0                    | 1                     |
| <b>Nerve, tibial (No. Examined)</b>        | 1     | 1                     | 1       | 2                    | 1                     |
| Degeneration; axonal                       | (1)   | (1)                   | (1)     | (2)                  | (1)                   |
| Minimal                                    | 1     | 0                     | 1       | 1                    | 0                     |
| Mild                                       | 0     | 1                     | 0       | 1                    | 1                     |

<sup>a</sup> Numbers in parentheses represent the number of animals with the finding.

At the injection site, which was located at the level of the caudal lumbar spinal cord (target L5-L6), there was moderate to marked axonal degeneration of the nerve roots of the cauda equina in both animals given AAV9/AP4M1 at 1.68x10<sup>14</sup> vg. The axonal degeneration consisted of vacuolation of the axonal sheath, swelling of the axon, and/or internal amorphous eosinophilic debris with or without macrophages (digestion chambers). In the male at 1.68x10<sup>14</sup> vg, there was additional minimal axonal degeneration of the dorsal funiculus, as well as mild perivascular vacuolation of macrophages. Minimal perivascular infiltrates of mononuclear cells were also noted in 2 females at ≥ 8.4x10<sup>13</sup> vg. These infiltrates were mainly composed of lymphocytes, with fewer macrophages. In general, the incidence and severity of axonal degeneration and/or mononuclear cell infiltrates at the injection site paralleled the incidence and severity of positive reaction to Fluoro-Jade B fluorescent stain (indicating degenerated axons), and increased intensity of IBA-1 (microglial cells) and/or GFAP (astrocytes) stains in the affected animals (Text Table 4).

In the lumbar spinal cord, there was an increase in the severity of axonal degeneration in the dorsal funiculus in both male and female at 1.68x10<sup>14</sup> vg (graded mild to moderate), when compared to control animals. Positivity to Fluoro-Jade B stain and increased intensity of IBA-1 and/or GFAP stains reflected well this change in both animals at 1.68x10<sup>14</sup> vg. Additionally, based on Fluoro-Jade B stain evaluation, minimal axonal degeneration was observed in the lateral and ventral funiculi of the female at 1.68x10<sup>14</sup> vg.

In the thoracic and cervical spinal cord, there was mild or moderate axonal degeneration in the dorsal funiculus at 1.68x10<sup>14</sup> vg in both sexes. Minimal severity of axonal degeneration seen in one female at 8.4x10<sup>13</sup> vg was not considered related to AAV9/AP4M1 given the similar

**Appendix 13**

incidence and severity of axonal degeneration noted in the spinal cord (lumbar) of the control female.

In the lumbar dorsal root ganglion, minimal mononuclear cell infiltrates occurred in all treated animals at  $\geq 8.4 \times 10^{13}$  vg, and correlated with minimal increased intensity of IBA-1 in 2 females at  $\geq 8.4 \times 10^{13}$  vg. Minimal neuronal degeneration was also noticed in the lumbar DRG in both male and female at  $1.68 \times 10^{14}$  vg. This latter change was characterized by the effacement/loss of rare neuronal cell bodies with presence of glial and/or mononuclear cells. Lumbar DRG findings were coupled with minimal axonal degeneration of the dorsal lumbar nerve root in both animals at  $1.68 \times 10^{14}$  vg, as well as minimal mononuclear cell infiltrates in females at  $\geq 8.4 \times 10^{13}$  vg, both changes correlating with Fluoro-Jade B stain positivity and/or increased intensity of IBA-1 and/or GFAP in these animals. Minimal mononuclear cell infiltrates were also seen in the dorsal thoracic nerve root in male at  $1.68 \times 10^{14}$  vg.

In the brain, there was minimal axonal degeneration at the periphery of the medulla oblongata in the male at  $1.68 \times 10^{14}$  vg, and there was an increase in the severity of meningeal mononuclear cell infiltrates in both females at  $8.4 \times 10^{13}$  vg (graded mild), when compared to control animals.

In the trigeminal ganglion, there was minimal axonal degeneration and mononuclear cell infiltrates in the male at  $1.68 \times 10^{14}$  vg.

In the peripheral nerves (sciatic, sural, and tibial), there was an increase in severity of axonal degeneration at  $1.68 \times 10^{14}$  vg in both sexes, compared to controls. This change was generally coupled with the presence of edema with or without mixed cell infiltrates dissecting through the nerve fibers and considered likely secondary to the inflammatory changes seen in the nearby biceps femoris (procedural-related changes, see below). Thus, the increase in severity of axonal degeneration seen in peripheral nerves was considered probably related to AAV9/AP4M1, but likely exacerbated by the edema/inflammation associated with experimental procedures (repetitive intramuscular injections).

Text Table 4  
Summary of Microscopic Findings (IHC and special stain) – Scheduled Euthanasia (Day 94)

|                                                     | Males            |                                 | Females     |                                |                                 |
|-----------------------------------------------------|------------------|---------------------------------|-------------|--------------------------------|---------------------------------|
|                                                     | Group 1          | Group 3                         | Group 1     | Group 2                        | Group 3                         |
|                                                     | Dose (vg) 0      | Dose (vg) $1.68 \times 10^{14}$ | Dose (vg) 0 | Dose (vg) $8.4 \times 10^{13}$ | Dose (vg) $1.68 \times 10^{14}$ |
| No. Animals per Group                               | 1                | 1                               | 1           | 2                              | 1                               |
| <b>Injection site, Fluoro-Jade B (No. Examined)</b> | 1                | 1                               | 1           | 2                              | 1                               |
| Degeneration; axonal, cauda equina                  | (0) <sup>a</sup> | (1)                             | (0)         | (0)                            | (1)                             |
| Moderate                                            | -                | 1                               | -           | -                              | 1                               |
| Degeneration; axonal, dorsal funiculus              | (0)              | (1)                             | (0)         | (1)                            | (0)                             |
| Minimal                                             | -                | 1                               | -           | 1                              | -                               |

**Appendix 13**

|                                                          | Males                 |     | Females               |     |                      |                       |
|----------------------------------------------------------|-----------------------|-----|-----------------------|-----|----------------------|-----------------------|
|                                                          | Group                 | 1   | 3                     | 1   | 2                    | 3                     |
|                                                          | Dose (vg)             | 0   | 1.68x10 <sup>14</sup> | 0   | 8.4x10 <sup>13</sup> | 1.68x10 <sup>14</sup> |
|                                                          | No. Animals per Group | 1   | 1                     | 1   | 2                    | 1                     |
| Injection site, IBA-1 (No. Examined)                     |                       | 1   | 1                     | 1   | 2                    | 1                     |
| Intensity, increased; cauda equina                       |                       | (0) | (1)                   | (0) | (2)                  | (1)                   |
| Minimal                                                  |                       | -   | 0                     | -   | 2                    | 0                     |
| Moderate                                                 |                       | -   | 1                     | -   | 0                    | 1                     |
| Intensity, increased; dorsal funiculus                   |                       | (0) | (1)                   | (0) | (0)                  | (1)                   |
| Minimal                                                  |                       | -   | 1                     | -   | -                    | 1                     |
| Injection site, GFAP (No. Examined)                      |                       | 1   | 1                     | 1   | 2                    | 1                     |
| Intensity, increased; cauda equina                       |                       | (0) | (1)                   | (0) | (2)                  | (1)                   |
| Minimal                                                  |                       | -   | 0                     | -   | 2                    | 0                     |
| Moderate                                                 |                       | -   | 1                     | -   | 0                    | 1                     |
| Intensity, increased; dorsal funiculus                   |                       | (0) | (1)                   | (0) | (0)                  | (0)                   |
| Minimal                                                  |                       | -   | 1                     | -   | -                    | -                     |
| Spinal cord, lumbar, Fluoro-Jade B (No. Examined)        |                       | 1   | 1                     | 1   | 2                    | 1                     |
| Degeneration; axonal, dorsal funiculus                   |                       | (0) | (1)                   | (1) | (2)                  | (1)                   |
| Minimal                                                  |                       | -   | 0                     | 1   | 2                    | 0                     |
| Mild                                                     |                       | -   | 0                     | 0   | 0                    | 1                     |
| Moderate                                                 |                       | -   | 1                     | 0   | 0                    | 0                     |
| Degeneration; axonal, lateral funiculus                  |                       | (0) | (0)                   | (0) | (0)                  | (1)                   |
| Minimal                                                  |                       | -   | -                     | -   | -                    | 1                     |
| Degeneration; axonal, ventral funiculus                  |                       | (0) | (0)                   | (0) | (0)                  | (1)                   |
| Minimal                                                  |                       | -   | -                     | -   | -                    | 1                     |
| Spinal cord, lumbar, IBA-1 (No. Examined)                |                       | 1   | 1                     | 1   | 2                    | 1                     |
| Intensity, increased; dorsal funiculus                   |                       | (0) | (1)                   | (0) | (1)                  | (1)                   |
| Minimal                                                  |                       | -   | 0                     | -   | 1                    | 0                     |
| Mild                                                     |                       | -   | 0                     | -   | 0                    | 1                     |
| Moderate                                                 |                       | -   | 1                     | -   | 0                    | 0                     |
| Spinal cord, lumbar, GFAP (No. Examined)                 |                       | 1   | 1                     | 1   | 2                    | 1                     |
| Intensity, increased; dorsal funiculus                   |                       | (0) | (1)                   | (0) | (0)                  | (0)                   |
| Mild                                                     |                       | -   | 1                     | -   | -                    | -                     |
| DRG, lumbar, IBA-1 (No. Examined)                        |                       | 1   | 1                     | 1   | 2                    | 1                     |
| Intensity, increased                                     |                       | (0) | (0)                   | (0) | (1)                  | (1)                   |
| Minimal                                                  |                       | -   | -                     | -   | 1                    | 1                     |
| Nerve root, dorsal, lumbar, Fluoro-Jade B (No. Examined) |                       | 1   | 1                     | 1   | 2                    | 1                     |
| Degeneration; axonal                                     |                       | (0) | (1)                   | (0) | (0)                  | (1)                   |
| Minimal                                                  |                       | -   | 1                     | -   | -                    | 1                     |
| Nerve root, dorsal, lumbar, IBA-1 (No. Examined)         |                       | 1   | 1                     | 1   | 2                    | 1                     |
| Intensity, increased                                     |                       | (0) | (0)                   | (0) | (2)                  | (1)                   |
| Minimal                                                  |                       | -   | -                     | -   | 2                    | 1                     |
| Nerve root, dorsal, lumbar, GFAP (No. Examined)          |                       | 1   | 1                     | 1   | 2                    | 1                     |
| Intensity, increased                                     |                       | (0) | (1)                   | (0) | (2)                  | (1)                   |
| Minimal                                                  |                       | -   | 1                     | -   | 2                    | 1                     |

<sup>a</sup> Numbers in parentheses represent the number of animals with the finding.

**Appendix 13**

Other microscopic findings observed were considered incidental, related to experimental procedures/immunosuppressant administration, of the nature commonly observed in this strain and age of monkeys, and/or were of similar incidence and severity in control and treated animals and, therefore, were considered unrelated to the administration of AAV9/AP4M1.

These included minimal to mild decreased lymphoid cellularity in the cervical and iliac lymph nodes and/or spleen that were seen with a similar incidence and severity in all groups, including controls, and considered secondary to the administration of immunosuppressants and unrelated to the administration of AAV9/AP4M1.

There was minimal axonal degeneration in the spinal cord and minimal mononuclear cell infiltrates in the brain (perivascular) and meninges, that were seen in several animals, including controls, and that were considered secondary to the procedure of intrathecal injection and unrelated to the administration of AAV9/AP4M1.

In the biceps femoris, microscopic findings of edema, necrosis/inflammation, myofiber degeneration/atrophy, and fibrosis (with gross correlates of swelling, thickness, dark/pale foci, and/or mottled discoloration) occurred with a similar incidence and severity across dose groups, including control animals. These findings were all considered secondary to the repetitive procedure of intramuscular injection in the thigh, and unrelated to the administration of AAV9/AP4M1.

In the iliac lymph nodes, minimal or mild sinus histiocytosis was also noted with a similar incidence and severity across dose groups, including controls, and was considered to be a physiological response to the inflammatory changes in the biceps femoris.

**Appendix 13****5. CONCLUSIONS**

The single intrathecal injection (slow bolus) of AAV9/AP4M1 to male and female monkeys at doses of  $8.4 \times 10^{13}$  or  $1.68 \times 10^{14}$  vg followed by a 93-day observation period resulted in pathological microscopic findings in the spinal cord (all segments, including the injection site), lumbar DRG, lumbar and thoracic dorsal nerve roots, brain, trigeminal ganglion, and peripheral nerves (sciatic, sural, and tibial).

At the injection site, axonal degeneration of the cauda equina was seen at  $1.68 \times 10^{14}$  vg in both sexes, while axonal degeneration of the dorsal funiculus and perivascular vacuolation of macrophages were seen in the male only. Perivascular infiltrates of mononuclear cells were noted in females at  $\geq 8.4 \times 10^{13}$  vg.

In the spinal cord, axonal degeneration of the dorsal funiculus was seen in all three segments and considered AAV9/AP4M1-related at  $1.68 \times 10^{14}$  vg in both sexes.

In the lumbar DRG, mononuclear cell infiltrates occurred at  $\geq 8.4 \times 10^{13}$  vg in both sexes, and neuronal degeneration was seen at  $1.68 \times 10^{14}$  vg in both sexes. In the dorsal lumbar nerve root, there was axonal degeneration at  $1.68 \times 10^{14}$  vg in both sexes, and mononuclear cell infiltrates in females at  $\geq 8.4 \times 10^{13}$  vg. Mononuclear cell infiltrates also occurred in the dorsal thoracic nerve root in the male at  $1.68 \times 10^{14}$  vg.

In the brain, axonal degeneration of the medulla oblongata was noted in the male at  $1.68 \times 10^{14}$  vg, and there was an increase in the severity of meningeal mononuclear cell infiltrates in both females at  $8.4 \times 10^{13}$  vg.

In the trigeminal ganglion, there was axonal degeneration and mononuclear cell infiltrates in the male at  $1.68 \times 10^{14}$  vg.

In the peripheral nerves (sciatic, sural, and tibial), there was an increase in severity of axonal degeneration at  $1.68 \times 10^{14}$  vg in both sexes, compared to controls, most likely exacerbated by the edema/inflammation associated with experimental procedures (repetitive intramuscular injections).

Overall, there was an increase in the severity of axonal degeneration in the central and peripheral nervous system in animals at  $1.68 \times 10^{14}$  vg (severity up to moderate or marked), when compared to animals at  $8.4 \times 10^{13}$  vg (severity minimal or mild).

The results from the pathological evaluation of Fluoro-Jade B, IBA-1 and GFAP stained lumbar spinal cord (including injection site) and lumbar DRG sections generally paralleled/confirmed the results previously mentioned with H&E stained sections.

**Appendix 13**

**6. REPORT APPROVAL**

All electronic signatures appear at the end of the document upon finalization.

**Appendix 13****Individual Pathology Explanation Page**

| <b>Abbreviation</b> | <b>Description</b>                                   |
|---------------------|------------------------------------------------------|
| (G)                 | Gross Pathology                                      |
| (H)                 | Histopathology                                       |
| (TGL)               | Trackable Gross Lesion                               |
| < or >              | Value outside the validation rule range in Provantis |
| Cass                | Cassette                                             |
| GALT                | Gut associated lymphoid tissue                       |
| ID                  | Identification                                       |
| LN                  | Lymph Node                                           |
| LT                  | Left                                                 |
| M                   | Mass                                                 |
| RT                  | Right                                                |
| SS                  | Special Stain                                        |
| Wt                  | Weight                                               |
| FC                  | Flag comment                                         |
| I                   | Macroscopic pathology – Included in mean             |
| RC                  | Result comment                                       |
| BW                  | Body Weight                                          |
| LIBW                | Lung infused before weighing                         |
| UPTD                | Unable to performed due to technical difficulty      |
| %bw                 | % Relative to Body Weight                            |
| %br                 | % Relative to Brain Weight                           |

Note: This is a comprehensive list of abbreviations. All of the abbreviations listed may not be applicable to this report.

**Dosing Information**

Dosing information is abbreviated on various data outputs; the following represents the dosing information for this study.

| <b>Group No.</b> | <b>Test Material</b> | <b>Dose Level (vg)</b> |
|------------------|----------------------|------------------------|
| 1                | Reference Item       | 0                      |
| 2                | AAV9/AP4M1           | $8.4 \times 10^{13}$   |
| 3                | AAV9/AP4M1           | $1.68 \times 10^{14}$  |

Sponsor Reference No. UTSW-Gray-SPG50-004

Test Facility Study No. 5550014

**Appendix 13****Appendix 1****Individual Absolute Organ Weights****5550014**

Sex: Male Day(s) Relative to Start Date

| 0<br>vg<br><br>Group 1 | Organ Weight (Absolute)     |              |                   |                         |                           |                          |                                |
|------------------------|-----------------------------|--------------|-------------------|-------------------------|---------------------------|--------------------------|--------------------------------|
|                        | Terminal<br>Body Wt<br>(Kg) | Brain<br>(g) | Epididymis<br>(g) | Gland<br>Adrenal<br>(g) | Gland<br>Pituitary<br>(g) | Gland<br>Prostate<br>(g) | Thyroid/<br>Parathyroid<br>(g) |
|                        | -                           | -            | -                 | -                       | -                         | -                        | -                              |
| 1201                   | 3.1                         | 76.895       | 5.673             | 0.373                   | 0.051                     | 0.189 I                  | 0.651 I                        |

I = Include

Test Facility Study No. 5550014

Sponsor Reference No. UTSW-Gray-SPG50-004

Sponsor Reference No. UTSW-Gray-SPG50-004

Test Facility Study No. 5550014

**Appendix 13****Appendix 1****Individual Absolute Organ Weights****5550014**

Sex: Male Day(s) Relative to Start Date

| 0<br>vg<br><br>Group 1 | Organ Weight (Absolute) |        |                       |        |        |         |
|------------------------|-------------------------|--------|-----------------------|--------|--------|---------|
|                        | Heart                   | Kidney | Liver/<br>Gallbladder | Spleen | Testis | Thymus  |
|                        | (g)                     | (g)    | (g)                   | (g)    | (g)    | (g)     |
|                        | -                       | -      | -                     | -      | -      | -       |
| 1201                   | 14.685                  | 14.510 | 68.400                | 3.102  | 4.307  | 0.323 I |

I = Include

Test Facility Study No. 5550014

Sponsor Reference No. UTSW-Gray-SPG50-004

Sponsor Reference No. UTSW-Gray-SPG50-004

Test Facility Study No. 5550014

**Appendix 13****Appendix 1****Individual Absolute Organ Weights****5550014**

Sex: Male Day(s) Relative to Start Date

| 1.68<br>X10E14<br>vg<br>Group 3 | Organ Weight (Absolute)     |              |                   |                         |                           |                          |                                |
|---------------------------------|-----------------------------|--------------|-------------------|-------------------------|---------------------------|--------------------------|--------------------------------|
|                                 | Terminal<br>Body Wt<br>(Kg) | Brain<br>(g) | Epididymis<br>(g) | Gland<br>Adrenal<br>(g) | Gland<br>Pituitary<br>(g) | Gland<br>Prostate<br>(g) | Thyroid/<br>Parathyroid<br>(g) |
|                                 | -                           | -            | -                 | -                       | -                         | -                        | -                              |
| 3201                            | 2.9                         | 73.555       | 1.095 I           | 0.235                   | 0.055                     | 0.566                    | 0.268                          |

I = Include

Test Facility Study No. 5550014

Sponsor Reference No. UTSW-Gray-SPG50-004

Sponsor Reference No. UTSW-Gray-SPG50-004

Test Facility Study No. 5550014

**Appendix 13****Appendix 1****Individual Absolute Organ Weights****5550014**

Sex: Male Day(s) Relative to Start Date

| 1.68<br>X10E14<br>vg<br>Group 3 | Organ Weight (Absolute) |        |                       |        |         |         |
|---------------------------------|-------------------------|--------|-----------------------|--------|---------|---------|
|                                 | Heart                   | Kidney | Liver/<br>Gallbladder | Spleen | Testis  | Thymus  |
|                                 | (g)                     | (g)    | (g)                   | (g)    | (g)     | (g)     |
|                                 | -                       | -      | -                     | -      | -       | -       |
| 3201                            | 10.743                  | 11.535 | 60.246                | 2.696  | 2.624 I | 0.233 I |

I = Include

Test Facility Study No. 5550014

Sponsor Reference No. UTSW-Gray-SPG50-004

Sponsor Reference No. UTSW-Gray-SPG50-004

Test Facility Study No. 5550014

**Appendix 13****Appendix 1****Individual Absolute Organ Weights****5550014**

Sex: Female Day(s) Relative to Start Date

| 0<br>vg<br><br>Group 1 | Organ Weight (Absolute)     |              |                         |                           |                                |              |               |
|------------------------|-----------------------------|--------------|-------------------------|---------------------------|--------------------------------|--------------|---------------|
|                        | Terminal<br>Body Wt<br>(Kg) | Brain<br>(g) | Gland<br>Adrenal<br>(g) | Gland<br>Pituitary<br>(g) | Thyroid/<br>Parathyroid<br>(g) | Heart<br>(g) | Kidney<br>(g) |
|                        | -                           | -            | -                       | -                         | -                              | -            | -             |
| 1701                   | 2.6                         | 65.096       | 0.354                   | 0.048                     | 0.125                          | 10.481       | 11.646        |

Test Facility Study No. 5550014

Sponsor Reference No. UTSW-Gray-SPG50-004

Sponsor Reference No. UTSW-Gray-SPG50-004

Test Facility Study No. 5550014

**Appendix 13****Appendix 1****Individual Absolute Organ Weights****5550014**

Sex: Female Day(s) Relative to Start Date

| 0<br>vg<br><br>Group 1 | Organ Weight (Absolute)      |              |               |                 |                          |
|------------------------|------------------------------|--------------|---------------|-----------------|--------------------------|
|                        | Liver/<br>Gallbladder<br>(g) | Ovary<br>(g) | Spleen<br>(g) | Thymus<br>(g)   | Uterus/<br>Cervix<br>(g) |
|                        | -                            | -            | -             | -               | -                        |
| 1701                   | 61.350                       | 0.208        | 2.020         | OA <sup>a</sup> | 3.770                    |

<sup>a</sup> [RC:Sample for bioanalysis already frozen.]

Test Facility Study No. 5550014

Sponsor Reference No. UTSW-Gray-SPG50-004

Sponsor Reference No. UTSW-Gray-SPG50-004

Test Facility Study No. 5550014

**Appendix 13****Appendix 1****Individual Absolute Organ Weights****5550014**

Sex: Female Day(s) Relative to Start Date

| 8.4<br>X10E13<br>vg<br>Group 2 | Organ Weight (Absolute)     |              |                         |                           |                                |              |               |
|--------------------------------|-----------------------------|--------------|-------------------------|---------------------------|--------------------------------|--------------|---------------|
|                                | Terminal<br>Body Wt<br>(Kg) | Brain<br>(g) | Gland<br>Adrenal<br>(g) | Gland<br>Pituitary<br>(g) | Thyroid/<br>Parathyroid<br>(g) | Heart<br>(g) | Kidney<br>(g) |
|                                | -                           | -            | -                       | -                         | -                              | -            | -             |
| 2701                           | 2.4                         | 61.512       | 0.423                   | 0.067                     | 0.355                          | 10.152       | 14.326        |
| 2702                           | 3.3                         | 66.853       | 0.466                   | 0.065                     | 0.354 I                        | 14.494       | 14.079        |

I = Include

Test Facility Study No. 5550014

Sponsor Reference No. UTSW-Gray-SPG50-004

Sponsor Reference No. UTSW-Gray-SPG50-004

Test Facility Study No. 5550014

**Appendix 13****Appendix 1****Individual Absolute Organ Weights****5550014**

Sex: Female Day(s) Relative to Start Date

| 8.4<br>X10E13<br>vg<br>Group 2 | Organ Weight (Absolute)      |              |               |               |                          |
|--------------------------------|------------------------------|--------------|---------------|---------------|--------------------------|
|                                | Liver/<br>Gallbladder<br>(g) | Ovary<br>(g) | Spleen<br>(g) | Thymus<br>(g) | Uterus/<br>Cervix<br>(g) |
|                                | -                            | -            | -             | -             | -                        |
| 2701                           | 62.937                       | 0.370        | 3.456         | 0.355 I       | 7.875                    |
| 2702                           | 94.766                       | 1.349 I      | 3.681         | 0.157 I       | 7.510                    |

I = Include

Test Facility Study No. 5550014

Sponsor Reference No. UTSW-Gray-SPG50-004

Sponsor Reference No. UTSW-Gray-SPG50-004

Test Facility Study No. 5550014

**Appendix 13****Appendix 1****Individual Absolute Organ Weights****5550014**

Sex: Female Day(s) Relative to Start Date

| 1.68<br>X10E14<br>vg<br>Group 3 | Organ Weight (Absolute)     |              |                         |                           |                                |              |               |
|---------------------------------|-----------------------------|--------------|-------------------------|---------------------------|--------------------------------|--------------|---------------|
|                                 | Terminal<br>Body Wt<br>(Kg) | Brain<br>(g) | Gland<br>Adrenal<br>(g) | Gland<br>Pituitary<br>(g) | Thyroid/<br>Parathyroid<br>(g) | Heart<br>(g) | Kidney<br>(g) |
|                                 | -                           | -            | -                       | -                         | -                              | -            | -             |
| 3701                            | 2.8                         | 58.631       | 0.318                   | 0.043                     | 0.329                          | 11.606       | 16.178        |

Test Facility Study No. 5550014

Sponsor Reference No. UTSW-Gray-SPG50-004

Sponsor Reference No. UTSW-Gray-SPG50-004

Test Facility Study No. 5550014

**Appendix 13****Appendix 1****Individual Absolute Organ Weights****5550014**

Sex: Female Day(s) Relative to Start Date

| 1.68<br>X10E14<br>vg<br>Group 3 | Organ Weight (Absolute)      |              |               |               |                          |
|---------------------------------|------------------------------|--------------|---------------|---------------|--------------------------|
|                                 | Liver/<br>Gallbladder<br>(g) | Ovary<br>(g) | Spleen<br>(g) | Thymus<br>(g) | Uterus/<br>Cervix<br>(g) |
|                                 | -                            | -            | -             | -             | -                        |
| 3701                            | 69.788                       | 0.428        | 1.914         | 0.443 I       | 5.061                    |

I = Include

Test Facility Study No. 5550014

Sponsor Reference No. UTSW-Gray-SPG50-004

Sponsor Reference No. UTSW-Gray-SPG50-004

Test Facility Study No. 5550014

**Appendix 13****Appendix 2****Individual Organ Weights Relative to Body Weight****5550014**

Sex: Male Day(s) Relative to Start Date

| 0<br>vg<br><br>Group 1 | Organ Weight (BW Kg) |                     |                           |                             |                            |                                  |                |
|------------------------|----------------------|---------------------|---------------------------|-----------------------------|----------------------------|----------------------------------|----------------|
|                        | Brain<br>(%bw)       | Epididymis<br>(%bw) | Gland<br>Adrenal<br>(%bw) | Gland<br>Pituitary<br>(%bw) | Gland<br>Prostate<br>(%bw) | Thyroid/<br>Parathyroid<br>(%bw) | Heart<br>(%bw) |
|                        | -                    | -                   | -                         | -                           | -                          | -                                | -              |
| 1201                   | 2.4805               | 0.1830              | 0.0120                    | 0.0016                      | 0.0061                     | 0.0210                           | 0.4737         |

Test Facility Study No. 5550014

Sponsor Reference No. UTSW-Gray-SPG50-004

Sponsor Reference No. UTSW-Gray-SPG50-004

Test Facility Study No. 5550014

**Appendix 13****Appendix 2****Individual Organ Weights Relative to Body Weight****5550014**

Sex: Male Day(s) Relative to Start Date

| 0<br>vg<br><br>Group 1 | Organ Weight (BW Kg) |                                |                 |                 |                 |
|------------------------|----------------------|--------------------------------|-----------------|-----------------|-----------------|
|                        | Kidney<br>(%bw)      | Liver/<br>Gallbladder<br>(%bw) | Spleen<br>(%bw) | Testis<br>(%bw) | Thymus<br>(%bw) |
|                        | -                    | -                              | -               | -               | -               |
| 1201                   | 0.4681               | 2.2065                         | 0.1001          | 0.1389          | 0.0104          |

Test Facility Study No. 5550014

Sponsor Reference No. UTSW-Gray-SPG50-004

Sponsor Reference No. UTSW-Gray-SPG50-004

Test Facility Study No. 5550014

**Appendix 13****Appendix 2****Individual Organ Weights Relative to Body Weight****5550014**

Sex: Male Day(s) Relative to Start Date

| 1.68<br>X10E14<br>vg<br>Group 3 | Organ Weight (BW Kg) |                     |                           |                             |                            |                                  |                |
|---------------------------------|----------------------|---------------------|---------------------------|-----------------------------|----------------------------|----------------------------------|----------------|
|                                 | Brain<br>(%bw)       | Epididymis<br>(%bw) | Gland<br>Adrenal<br>(%bw) | Gland<br>Pituitary<br>(%bw) | Gland<br>Prostate<br>(%bw) | Thyroid/<br>Parathyroid<br>(%bw) | Heart<br>(%bw) |
|                                 | -                    | -                   | -                         | -                           | -                          | -                                | -              |
| 3201                            | 2.5364               | 0.0378              | 0.0081                    | 0.0019                      | 0.0195                     | 0.0092                           | 0.3704         |

Test Facility Study No. 5550014

Sponsor Reference No. UTSW-Gray-SPG50-004

Sponsor Reference No. UTSW-Gray-SPG50-004

Test Facility Study No. 5550014

**Appendix 13****Appendix 2****Individual Organ Weights Relative to Body Weight****5550014**

Sex: Male Day(s) Relative to Start Date

| 1.68<br>X10E14<br>vg<br>Group 3 | Organ Weight (BW Kg) |                                |                 |                 |                 |
|---------------------------------|----------------------|--------------------------------|-----------------|-----------------|-----------------|
|                                 | Kidney<br>(%bw)      | Liver/<br>Gallbladder<br>(%bw) | Spleen<br>(%bw) | Testis<br>(%bw) | Thymus<br>(%bw) |
|                                 | -                    | -                              | -               | -               | -               |
| 3201                            | 0.3978               | 2.0774                         | 0.0930          | 0.0905          | 0.0080          |

Test Facility Study No. 5550014

Sponsor Reference No. UTSW-Gray-SPG50-004

Sponsor Reference No. UTSW-Gray-SPG50-004

Test Facility Study No. 5550014

**Appendix 13****Appendix 2****Individual Organ Weights Relative to Body Weight****5550014**

Sex: Female Day(s) Relative to Start Date

| 0<br>vg<br><br>Group 1 | Organ Weight (BW Kg) |                           |                             |                                  |                |                 |                                |
|------------------------|----------------------|---------------------------|-----------------------------|----------------------------------|----------------|-----------------|--------------------------------|
|                        | Brain<br>(%bw)       | Gland<br>Adrenal<br>(%bw) | Gland<br>Pituitary<br>(%bw) | Thyroid/<br>Parathyroid<br>(%bw) | Heart<br>(%bw) | Kidney<br>(%bw) | Liver/<br>Gallbladder<br>(%bw) |
|                        | -                    | -                         | -                           | -                                | -              | -               | -                              |
| 1701                   | 2.5037               | 0.0136                    | 0.0018                      | 0.0048                           | 0.4031         | 0.4479          | 2.3596                         |

Test Facility Study No. 5550014

Sponsor Reference No. UTSW-Gray-SPG50-004

Sponsor Reference No. UTSW-Gray-SPG50-004

Test Facility Study No. 5550014

**Appendix 13****Appendix 2****Individual Organ Weights Relative to Body Weight****5550014**

Sex: Female Day(s) Relative to Start Date

| 0<br>vg<br><br>Group 1 | Organ Weight (BW Kg) |        |                   |
|------------------------|----------------------|--------|-------------------|
|                        | Ovary                | Spleen | Uterus/<br>Cervix |
|                        | (%bw)                | (%bw)  | (%bw)             |
|                        | -                    | -      | -                 |
| 1701                   | 0.0080               | 0.0777 | 0.1450            |

Test Facility Study No. 5550014

Sponsor Reference No. UTSW-Gray-SPG50-004

Sponsor Reference No. UTSW-Gray-SPG50-004

Test Facility Study No. 5550014

**Appendix 13****Appendix 2****Individual Organ Weights Relative to Body Weight****5550014**

Sex: Female Day(s) Relative to Start Date

| 8.4<br>X10E13<br>vg<br>Group 2 | Organ Weight (BW Kg) |                           |                             |                                  |                |                 |                                |
|--------------------------------|----------------------|---------------------------|-----------------------------|----------------------------------|----------------|-----------------|--------------------------------|
|                                | Brain<br>(%bw)       | Gland<br>Adrenal<br>(%bw) | Gland<br>Pituitary<br>(%bw) | Thyroid/<br>Parathyroid<br>(%bw) | Heart<br>(%bw) | Kidney<br>(%bw) | Liver/<br>Gallbladder<br>(%bw) |
|                                | -                    | -                         | -                           | -                                | -              | -               | -                              |
| 2701                           | 2.5630               | 0.0176                    | 0.0028                      | 0.0148                           | 0.4230         | 0.5969          | 2.6224                         |
| 2702                           | 2.0258               | 0.0141                    | 0.0020                      | 0.0107                           | 0.4392         | 0.4266          | 2.8717                         |

Test Facility Study No. 5550014

Sponsor Reference No. UTSW-Gray-SPG50-004

Sponsor Reference No. UTSW-Gray-SPG50-004

Test Facility Study No. 5550014

**Appendix 13****Appendix 2****Individual Organ Weights Relative to Body Weight****5550014**

Sex: Female Day(s) Relative to Start Date

| 8.4<br>X10E13<br>vg<br>Group 2 | Organ Weight (BW Kg) |        |        |                   |
|--------------------------------|----------------------|--------|--------|-------------------|
|                                | Ovary                | Spleen | Thymus | Uterus/<br>Cervix |
|                                | (%bw)                | (%bw)  | (%bw)  | (%bw)             |
|                                | -                    | -      | -      | -                 |
| 2701                           | 0.0154               | 0.1440 | 0.0148 | 0.3281            |
| 2702                           | 0.0409               | 0.1115 | 0.0048 | 0.2276            |

Test Facility Study No. 5550014

Sponsor Reference No. UTSW-Gray-SPG50-004

Sponsor Reference No. UTSW-Gray-SPG50-004

Test Facility Study No. 5550014

**Appendix 13****Appendix 2****Individual Organ Weights Relative to Body Weight****5550014**

Sex: Female Day(s) Relative to Start Date

| 1.68<br>X10E14<br>vg<br>Group 3 | Organ Weight (BW Kg) |                           |                             |                                  |                |                 |                                |
|---------------------------------|----------------------|---------------------------|-----------------------------|----------------------------------|----------------|-----------------|--------------------------------|
|                                 | Brain<br>(%bw)       | Gland<br>Adrenal<br>(%bw) | Gland<br>Pituitary<br>(%bw) | Thyroid/<br>Parathyroid<br>(%bw) | Heart<br>(%bw) | Kidney<br>(%bw) | Liver/<br>Gallbladder<br>(%bw) |
|                                 | -                    | -                         | -                           | -                                | -              | -               | -                              |
| 3701                            | 2.0940               | 0.0114                    | 0.0015                      | 0.0118                           | 0.4145         | 0.5778          | 2.4924                         |

Test Facility Study No. 5550014

Sponsor Reference No. UTSW-Gray-SPG50-004

Sponsor Reference No. UTSW-Gray-SPG50-004

Test Facility Study No. 5550014

**Appendix 13****Appendix 2****Individual Organ Weights Relative to Body Weight****5550014**

Sex: Female Day(s) Relative to Start Date

| 1.68<br>X10E14<br>vg<br>Group 3 | Organ Weight (BW Kg) |        |        |                   |
|---------------------------------|----------------------|--------|--------|-------------------|
|                                 | Ovary                | Spleen | Thymus | Uterus/<br>Cervix |
|                                 | (%bw)                | (%bw)  | (%bw)  | (%bw)             |
|                                 | -                    | -      | -      | -                 |
| 3701                            | 0.0153               | 0.0684 | 0.0158 | 0.1808            |

Test Facility Study No. 5550014

Sponsor Reference No. UTSW-Gray-SPG50-004

Sponsor Reference No. UTSW-Gray-SPG50-004

Test Facility Study No. 5550014

**Appendix 13****Appendix 3****Individual Organ Weights Relative to Brain Weight****5550014**

Sex: Male Day(s) Relative to Start Date

| 0<br>vg<br><br>Group 1 | Organ Weight/Brain Ratio |                           |                             |                            |                                  |                |                 |
|------------------------|--------------------------|---------------------------|-----------------------------|----------------------------|----------------------------------|----------------|-----------------|
|                        | Epididymis<br>(%br)      | Gland<br>Adrenal<br>(%br) | Gland<br>Pituitary<br>(%br) | Gland<br>Prostate<br>(%br) | Thyroid/<br>Parathyroid<br>(%br) | Heart<br>(%br) | Kidney<br>(%br) |
|                        | -                        | -                         | -                           | -                          | -                                | -              | -               |
| 1201                   | 7.3776                   | 0.4851                    | 0.0663                      | 0.2458                     | 0.8466                           | 19.0975        | 18.8699         |

Test Facility Study No. 5550014

Sponsor Reference No. UTSW-Gray-SPG50-004

Sponsor Reference No. UTSW-Gray-SPG50-004

Test Facility Study No. 5550014

**Appendix 13****Appendix 3****Individual Organ Weights Relative to Brain Weight****5550014**

Sex: Male Day(s) Relative to Start Date

| 0<br>vg<br><br>Group 1 | Organ Weight/Brain Ratio       |                 |                 |                 |
|------------------------|--------------------------------|-----------------|-----------------|-----------------|
|                        | Liver/<br>Gallbladder<br>(%br) | Spleen<br>(%br) | Testis<br>(%br) | Thymus<br>(%br) |
|                        | -                              | -               | -               | -               |
| 1201                   | 88.9525                        | 4.0341          | 5.6011          | 0.4201          |

Test Facility Study No. 5550014

Sponsor Reference No. UTSW-Gray-SPG50-004

Sponsor Reference No. UTSW-Gray-SPG50-004

Test Facility Study No. 5550014

**Appendix 13****Appendix 3****Individual Organ Weights Relative to Brain Weight****5550014**

Sex: Male Day(s) Relative to Start Date

| 1.68<br>X10E14<br>vg<br>Group 3 | Organ Weight/Brain Ratio |                           |                             |                            |                                  |                |                 |
|---------------------------------|--------------------------|---------------------------|-----------------------------|----------------------------|----------------------------------|----------------|-----------------|
|                                 | Epididymis<br>(%br)      | Gland<br>Adrenal<br>(%br) | Gland<br>Pituitary<br>(%br) | Gland<br>Prostate<br>(%br) | Thyroid/<br>Parathyroid<br>(%br) | Heart<br>(%br) | Kidney<br>(%br) |
|                                 | -                        | -                         | -                           | -                          | -                                | -              | -               |
| 3201                            | 1.4887                   | 0.3195                    | 0.0748                      | 0.7695                     | 0.3644                           | 14.6054        | 15.6821         |

Test Facility Study No. 5550014

Sponsor Reference No. UTSW-Gray-SPG50-004

Sponsor Reference No. UTSW-Gray-SPG50-004

Test Facility Study No. 5550014

**Appendix 13****Appendix 3****Individual Organ Weights Relative to Brain Weight****5550014**

Sex: Male Day(s) Relative to Start Date

| 1.68<br>X10E14<br>vg<br>Group 3 | Organ Weight/Brain Ratio       |                 |                 |                 |
|---------------------------------|--------------------------------|-----------------|-----------------|-----------------|
|                                 | Liver/<br>Gallbladder<br>(%br) | Spleen<br>(%br) | Testis<br>(%br) | Thymus<br>(%br) |
|                                 | -                              | -               | -               | -               |
| 3201                            | 81.9061                        | 3.6653          | 3.5674          | 0.3168          |

Test Facility Study No. 5550014

Sponsor Reference No. UTSW-Gray-SPG50-004

Sponsor Reference No. UTSW-Gray-SPG50-004

Test Facility Study No. 5550014

**Appendix 13****Appendix 3****Individual Organ Weights Relative to Brain Weight****5550014**

Sex: Female Day(s) Relative to Start Date

| 0<br>vg<br><br>Group 1 | Organ Weight/Brain Ratio  |                             |                                  |                |                 |                                |                |
|------------------------|---------------------------|-----------------------------|----------------------------------|----------------|-----------------|--------------------------------|----------------|
|                        | Gland<br>Adrenal<br>(%br) | Gland<br>Pituitary<br>(%br) | Thyroid/<br>Parathyroid<br>(%br) | Heart<br>(%br) | Kidney<br>(%br) | Liver/<br>Gallbladder<br>(%br) | Ovary<br>(%br) |
|                        | -                         | -                           | -                                | -              | -               | -                              | -              |
| 1701                   | 0.5438                    | 0.0737                      | 0.1920                           | 16.1008        | 17.8905         | 94.2454                        | 0.3195         |

Test Facility Study No. 5550014

Sponsor Reference No. UTSW-Gray-SPG50-004

Sponsor Reference No. UTSW-Gray-SPG50-004

**Appendix 13****Appendix 3****Individual Organ Weights Relative to Brain Weight****5550014**

Sex: Female Day(s) Relative to Start Date

| 0<br>vg<br><br>Group 1 | Organ Weight/Brain Ratio |                   |
|------------------------|--------------------------|-------------------|
|                        | Spleen                   | Uterus/<br>Cervix |
|                        | (%br)                    | (%br)             |
|                        | -                        | -                 |
| 1701                   | 3.1031                   | 5.7914            |

Test Facility Study No. 5550014

Sponsor Reference No. UTSW-Gray-SPG50-004

Sponsor Reference No. UTSW-Gray-SPG50-004

Test Facility Study No. 5550014

**Appendix 13****Appendix 3****Individual Organ Weights Relative to Brain Weight****5550014**

Sex: Female Day(s) Relative to Start Date

| 8.4<br>X10E13<br>vg<br>Group 2 | Organ Weight/Brain Ratio  |                             |                                  |                |                 |                                |                |
|--------------------------------|---------------------------|-----------------------------|----------------------------------|----------------|-----------------|--------------------------------|----------------|
|                                | Gland<br>Adrenal<br>(%br) | Gland<br>Pituitary<br>(%br) | Thyroid/<br>Parathyroid<br>(%br) | Heart<br>(%br) | Kidney<br>(%br) | Liver/<br>Gallbladder<br>(%br) | Ovary<br>(%br) |
|                                | -                         | -                           | -                                | -              | -               | -                              | -              |
| 2701                           | 0.6877                    | 0.1089                      | 0.5771                           | 16.5041        | 23.2898         | 102.3166                       | 0.6015         |
| 2702                           | 0.6971                    | 0.0972                      | 0.5295                           | 21.6804        | 21.0596         | 141.7528                       | 2.0179         |

Test Facility Study No. 5550014

Sponsor Reference No. UTSW-Gray-SPG50-004

Sponsor Reference No. UTSW-Gray-SPG50-004

Test Facility Study No. 5550014

**Appendix 13****Appendix 3****Individual Organ Weights Relative to Brain Weight****5550014**

Sex: Female Day(s) Relative to Start Date

| 8.4<br>X10E13<br>vg<br>Group 2 | Organ Weight/Brain Ratio |        |                   |
|--------------------------------|--------------------------|--------|-------------------|
|                                | Spleen                   | Thymus | Uterus/<br>Cervix |
|                                | (%br)                    | (%br)  | (%br)             |
|                                | -                        | -      | -                 |
| 2701                           | 5.6184                   | 0.5771 | 12.8024           |
| 2702                           | 5.5061                   | 0.2348 | 11.2336           |

Test Facility Study No. 5550014

Sponsor Reference No. UTSW-Gray-SPG50-004

Sponsor Reference No. UTSW-Gray-SPG50-004

Test Facility Study No. 5550014

**Appendix 13****Appendix 3****Individual Organ Weights Relative to Brain Weight****5550014**

Sex: Female Day(s) Relative to Start Date

| 1.68<br>X10E14<br>vg<br>Group 3 | Organ Weight/Brain Ratio  |                             |                                  |                |                 |                                |                |
|---------------------------------|---------------------------|-----------------------------|----------------------------------|----------------|-----------------|--------------------------------|----------------|
|                                 | Gland<br>Adrenal<br>(%br) | Gland<br>Pituitary<br>(%br) | Thyroid/<br>Parathyroid<br>(%br) | Heart<br>(%br) | Kidney<br>(%br) | Liver/<br>Gallbladder<br>(%br) | Ovary<br>(%br) |
|                                 | -                         | -                           | -                                | -              | -               | -                              | -              |
| 3701                            | 0.5424                    | 0.0733                      | 0.5611                           | 19.7950        | 27.5929         | 119.0292                       | 0.7300         |

Test Facility Study No. 5550014

Sponsor Reference No. UTSW-Gray-SPG50-004

Sponsor Reference No. UTSW-Gray-SPG50-004

Test Facility Study No. 5550014

**Appendix 13****Appendix 3****Individual Organ Weights Relative to Brain Weight****5550014**

Sex: Female Day(s) Relative to Start Date

| 1.68<br>X10E14<br>vg<br>Group 3 | Organ Weight/Brain Ratio |        |                   |
|---------------------------------|--------------------------|--------|-------------------|
|                                 | Spleen                   | Thymus | Uterus/<br>Cervix |
|                                 | (%br)                    | (%br)  | (%br)             |
|                                 | -                        | -      | -                 |
| 3701                            | 3.2645                   | 0.7556 | 8.6320            |

Test Facility Study No. 5550014

Sponsor Reference No. UTSW-Gray-SPG50-004

**Appendix 13****Appendix 4****Individual Macroscopic and Microscopic Pathology****5550014**

|                 |                                     |           |
|-----------------|-------------------------------------|-----------|
| Animal: 1201    | Group: 1                            | Sex: Male |
| Species: Monkey | Strain: Cyno Vietnam                |           |
|                 | Dose: 0 vg                          |           |
|                 | Removal Reason: Terminal Euthanasia |           |
|                 | Study Day (Week) of Death: 94 (14)  |           |

**Gross Pathology Animal Details:**

No animal details found

**Gross Pathology Observations [Correlation]:**

GLAND, PROSTATE : Small  
 GLAND, SEMINAL VESICLE : Small : (Comment) bilateral  
 GLAND, THYROID : Enlargement : (Comment) bilateral  
 MUSCLE, BICEPS FEMORIS : Focus, dark : (Comment) 2, left (TGL)  
 MUSCLE, BICEPS FEMORIS : Thick : (Comment) bilateral (TGL)  
 MUSCLE, BICEPS FEMORIS : Discoloration, mottled : (Comment) right (TGL)  
 THYMUS : Small

Any remaining study plan required tissues, which have been examined, have no visible lesions

**Gross Pathology - The following Tissues were Not Examined:**

None

**Histopathology Animal Details:**

No animal details found

**Histopathology Observations [Correlation]:**

BRAIN : Infiltration, mononuclear cell; perivascular, minimal  
 BRAIN : Infiltration, mononuclear cell; minimal, meninges  
 LYMPH NODE, CERVICAL : Cellularity, decreased; lymphoid, minimal  
 LYMPH NODE, ILIAC : Erythrocytosis; minimal : (Comment) with pigment  
 LYMPH NODE, ILIAC : Cellularity, decreased; lymphoid, minimal  
 LYMPH NODE, ILIAC : Sinus histiocytosis; mild  
 LYMPH NODE, ILIAC : Granuloma; minimal  
 MUSCLE, BICEPS FEMORIS : Edema; moderate [MUSCLE, BICEPS FEMORIS : Discoloration, mottled : (Comment) right (G) | MUSCLE, BICEPS FEMORIS : Thick : (Comment) bilateral (G)]  
 MUSCLE, BICEPS FEMORIS : Fibrosis; mild : (Comment) with myofiber atrophy  
 MUSCLE, BICEPS FEMORIS : Degeneration/atrophy; moderate, myofiber : (Comment) with regeneration  
 MUSCLE, BICEPS FEMORIS : Necrosis/inflammation; moderate : (Comment) with hemorrhage [MUSCLE, BICEPS FEMORIS : Discoloration, mottled : (Comment) right (G) | MUSCLE, BICEPS FEMORIS : Focus, dark : (Comment) 2, left (G)]  
 NERVE, SCIATIC : Degeneration; axonal, minimal  
 NERVE, SCIATIC : Infiltration, mononuclear cell; minimal  
 NERVE, SCIATIC : Edema; minimal : (Comment) with vacuolated macrophages  
 NERVE, TIBIAL : Degeneration; axonal, minimal  
 NERVE, TIBIAL : Infiltration, mononuclear cell; minimal  
 SITE, INJECTION : Infiltration, mononuclear cell; minimal, meninges  
 SPLEEN : Cellularity, decreased; lymphoid, minimal

**Histopathology - The following Tissues were Within Normal Limits:**

**Appendix 13**  
**Appendix 4****Individual Macroscopic and Microscopic Pathology****5550014**

| Animal:                                                                                                                                                                                                                                                                                                                                                                                                                                                                                                                                                                                                                                                                                                                                                                                                                                                                                                                                                                                                                                       | 1201 (Continued) | Group: | 1 | Sex: | Male |
|-----------------------------------------------------------------------------------------------------------------------------------------------------------------------------------------------------------------------------------------------------------------------------------------------------------------------------------------------------------------------------------------------------------------------------------------------------------------------------------------------------------------------------------------------------------------------------------------------------------------------------------------------------------------------------------------------------------------------------------------------------------------------------------------------------------------------------------------------------------------------------------------------------------------------------------------------------------------------------------------------------------------------------------------------|------------------|--------|---|------|------|
| GANGLION, DORSAL ROOT, CERVICAL; GANGLION, DORSAL ROOT, LUMBAR; GANGLION, DORSAL ROOT, LUMBAR, FLUOROJADE B SS; GANGLION, DORSAL ROOT, LUMBAR, GFAP SS; GANGLION, DORSAL ROOT, LUMBAR, IBA-1 SS; GANGLION, DORSAL ROOT, THORACIC; GANGLION, TRIGEMINAL; HEART; KIDNEY; LIVER; MUSCLE, GASTROCNEMIUS; NERVE, OPTIC; NERVE, SURAL; NERVE ROOT, DORSAL, CERVICAL; NERVE ROOT, DORSAL, LUMBAR; NERVE ROOT, DORSAL, LUMBAR, FLUOROJADE B SS; NERVE ROOT, DORSAL, LUMBAR, GFAP SS; NERVE ROOT, DORSAL, LUMBAR, IBA-1 SS; NERVE ROOT, DORSAL, THORACIC; NERVE ROOT, VENTRAL, CERVICAL; NERVE ROOT, VENTRAL, LUMBAR; NERVE ROOT, VENTRAL, LUMBAR FLUOROJADE B SS; NERVE ROOT, VENTRAL, LUMBAR, GFAP SS; NERVE ROOT, VENTRAL, LUMBAR, IBA-1 SS; NERVE ROOT, VENTRAL, THORACIC; SITE, INJECTION, FLUOROJADE B SS; SITE, INJECTION, GFAP - IHC SS; SITE, INJECTION, IBA-1 - IHC SS; SPINAL CORD, CERVICAL; SPINAL CORD, LUMBAR; SPINAL CORD, LUMBAR, FLUOROJADE B SS; SPINAL CORD, LUMBAR, GFAP SS; SPINAL CORD, LUMBAR, IBA-1 SS; SPINAL CORD, THORACIC |                  |        |   |      |      |

**Histopathology - The following Tissues were Not Examined:**

None

**Appendix 13**  
**Appendix 4****Individual Macroscopic and Microscopic Pathology****5550014**

|                 |                                     |             |
|-----------------|-------------------------------------|-------------|
| Animal: 1701    | Group: 1                            | Sex: Female |
| Species: Monkey | Strain: Cyno Vietnam                |             |
|                 | Dose: 0 vg                          |             |
|                 | Removal Reason: Terminal Euthanasia |             |
|                 | Study Day (Week) of Death: 94 (14)  |             |

**Gross Pathology Animal Details:**

No animal details found

**Gross Pathology Observations [Correlation]:**

GLAND, SALIVARY, MANDIBULAR : Swelling : (Comment) bilateral  
 MUSCLE, BICEPS FEMORIS : Focus, dark : (Comment) 2 to 3, bilateral (TGL)  
 MUSCLE, BICEPS FEMORIS : Swelling : (Comment) extending into sciatic nerve, right (TGL)  
 THYMUS : Small

Any remaining study plan required tissues, which have been examined, have no visible lesions

**Gross Pathology - The following Tissues were Not Examined:**

None

**Histopathology Animal Details:**

No animal details found

**Histopathology Observations [Correlation]:**

BRAIN : Infiltration, mononuclear cell; perivascular, minimal  
 GANGLION, DORSAL ROOT, THORACIC : Infiltration, mononuclear cell; minimal  
 LYMPH NODE, ILIAC : Cellularity, decreased; lymphoid, minimal  
 LYMPH NODE, ILIAC : Sinus histiocytosis; mild  
 MUSCLE, BICEPS FEMORIS : Edema; moderate [MUSCLE, BICEPS FEMORIS : Swelling : (Comment) extending into sciatic nerve, right (G)]  
 MUSCLE, BICEPS FEMORIS : Degeneration/atrophy; mild, myofiber : (Comment) with regeneration  
 MUSCLE, BICEPS FEMORIS : Necrosis/inflammation; moderate : (Comment) with hemorrhage [MUSCLE, BICEPS FEMORIS : Focus, dark : (Comment) 2 to 3, bilateral (G)]  
 NERVE, SCIATIC : Degeneration; axonal, mild  
 NERVE, SCIATIC : Hemorrhage; minimal  
 NERVE, SCIATIC : Edema; minimal : (Comment) with mixed cell infiltrates  
 NERVE, TIBIAL : Degeneration; axonal, minimal  
 SPINAL CORD, LUMBAR : Degeneration; axonal, minimal, dorsal funiculus  
 SPINAL CORD, LUMBAR, FLUOROJADE B SS : Degeneration; axonal, minimal, dorsal funiculus  
 SPLEEN : Cellularity, decreased; lymphoid, minimal

**Histopathology - The following Tissues were Within Normal Limits:**

**Appendix 13**  
**Appendix 4****Individual Macroscopic and Microscopic Pathology****5550014**

| Animal: 1701 (Continued)                                                                                                                                                                                                                                                                                                                                                                                                                                                                                                                                                                                                                                                                                                                                                                                                                                                                                                                                                                  | Group: 1 | Sex: Female |
|-------------------------------------------------------------------------------------------------------------------------------------------------------------------------------------------------------------------------------------------------------------------------------------------------------------------------------------------------------------------------------------------------------------------------------------------------------------------------------------------------------------------------------------------------------------------------------------------------------------------------------------------------------------------------------------------------------------------------------------------------------------------------------------------------------------------------------------------------------------------------------------------------------------------------------------------------------------------------------------------|----------|-------------|
| GANGLION, DORSAL ROOT, CERVICAL; GANGLION, DORSAL ROOT, LUMBAR; GANGLION, DORSAL ROOT, LUMBAR, FLUOROJADE B SS; GANGLION, DORSAL ROOT, LUMBAR, GFAP SS; GANGLION, DORSAL ROOT, LUMBAR, IBA-1 SS; GANGLION, TRIGEMINAL; HEART; KIDNEY; LIVER; LYMPH NODE, CERVICAL; MUSCLE, GASTROCNEMIUS; NERVE, OPTIC; NERVE, SURAL; NERVE ROOT, DORSAL, CERVICAL; NERVE ROOT, DORSAL, LUMBAR; NERVE ROOT, DORSAL, LUMBAR, FLUOROJADE B SS; NERVE ROOT, DORSAL, LUMBAR, GFAP SS; NERVE ROOT, DORSAL, LUMBAR, IBA-1 SS; NERVE ROOT, DORSAL, THORACIC; NERVE ROOT, VENTRAL, CERVICAL; NERVE ROOT, VENTRAL, LUMBAR; NERVE ROOT, VENTRAL, LUMBAR, FLUOROJADE B SS; NERVE ROOT, VENTRAL, LUMBAR, GFAP SS; NERVE ROOT, VENTRAL, LUMBAR, IBA-1 SS; NERVE ROOT, VENTRAL, THORACIC; SITE, INJECTION; SITE, INJECTION, FLUOROJADE B SS; SITE, INJECTION, GFAP - IHC SS; SITE, INJECTION, IBA-1 - IHC SS; SPINAL CORD, CERVICAL; SPINAL CORD, LUMBAR, GFAP SS; SPINAL CORD, LUMBAR, IBA-1 SS; SPINAL CORD, THORACIC |          |             |

**Histopathology - The following Tissues were Not Examined:**

None

## Appendix 13

### Appendix 4

#### Individual Macroscopic and Microscopic Pathology

##### 5550014

|                 |                                     |             |
|-----------------|-------------------------------------|-------------|
| Animal: 2701    | Group: 2                            | Sex: Female |
| Species: Monkey | Strain: Cyno Vietnam                |             |
|                 | Dose: 8.4 X10E13 vg                 |             |
|                 | Removal Reason: Terminal Euthanasia |             |
|                 | Study Day (Week) of Death: 94 (14)  |             |

#### Gross Pathology Animal Details:

No animal details found

#### Gross Pathology Observations [Correlation]:

MUSCLE, BICEPS FEMORIS : Thick : (Comment) right (TGL)

MUSCLE, BICEPS FEMORIS : Focus, pale : (Comment) 5, right (TGL)

THYMUS : Small

Any remaining study plan required tissues, which have been examined, have no visible lesions

#### Gross Pathology - The following Tissues were Not Examined:

None

#### Histopathology Animal Details:

No animal details found

#### Histopathology Observations [Correlation]:

BRAIN : Infiltration, mononuclear cell; perivascular, minimal

BRAIN : Infiltration, mononuclear cell; mild, meninges

GANGLION, DORSAL ROOT, LUMBAR : Infiltration, mononuclear cell; minimal

KIDNEY : Infiltration, mononuclear cell; interstitial, minimal

LIVER : Infiltration, mononuclear cell; minimal

LYMPH NODE, ILIAC : Erythrocytosis; mild : (Comment) with pigment

LYMPH NODE, ILIAC : Cellularity, decreased; lymphoid, minimal

LYMPH NODE, ILIAC : Sinus histiocytosis; minimal

MUSCLE, BICEPS FEMORIS : Edema; mild [MUSCLE, BICEPS FEMORIS : Thick : (Comment) right (G)]

MUSCLE, BICEPS FEMORIS : Fibrosis; mild : (Comment) with myofiber atrophy [MUSCLE, BICEPS FEMORIS : Focus, pale : (Comment) 5, right (G)]

MUSCLE, BICEPS FEMORIS : Degeneration/atrophy; mild, myofiber : (Comment) with regeneration

MUSCLE, BICEPS FEMORIS : Necrosis/inflammation; mild [MUSCLE, BICEPS FEMORIS : Focus, pale : (Comment) 5, right (G)]

MUSCLE, GASTROCNEMIUS : Infiltration, mononuclear cell; minimal

NERVE, SCIATIC : Degeneration; axonal, mild

NERVE, SURAL : Degeneration; axonal, minimal

NERVE, SURAL : Infiltration, mononuclear cell; minimal

NERVE, TIBIAL : Degeneration; axonal, minimal

NERVE ROOT, DORSAL, LUMBAR : Infiltration, mononuclear cell; minimal

NERVE ROOT, DORSAL, LUMBAR, GFAP SS : Intensity, increased; minimal

NERVE ROOT, DORSAL, LUMBAR, IBA-1 SS : Intensity, increased; minimal

SITE, INJECTION : Infiltration, mononuclear cell; perivascular, minimal

SITE, INJECTION, GFAP - IHC SS : Intensity, increased; minimal, cauda equina

SITE, INJECTION, IBA-1 - IHC SS : Intensity, increased; minimal, cauda equina

**Appendix 13**  
**Appendix 4****Individual Macroscopic and Microscopic Pathology****5550014**

---

|                          |          |             |
|--------------------------|----------|-------------|
| Animal: 2701 (Continued) | Group: 2 | Sex: Female |
|--------------------------|----------|-------------|

---

**Histopathology Observations [Correlation] (Continued):**

SPINAL CORD, CERVICAL : Degeneration; axonal, minimal, dorsal funiculus

SPINAL CORD, LUMBAR : Degeneration; axonal, minimal, dorsal funiculus

SPINAL CORD, LUMBAR, FLUOROJADE B SS : Degeneration; axonal, minimal, dorsal funiculus

SPINAL CORD, LUMBAR, IBA-1 SS : Intensity, increased; minimal, dorsal funiculus

SPINAL CORD, THORACIC : Degeneration; axonal, minimal, dorsal funiculus

**Histopathology - The following Tissues were Within Normal Limits:**

GANGLION, DORSAL ROOT, CERVICAL; GANGLION, DORSAL ROOT, LUMBAR, FLUOROJADE B SS; GANGLION, DORSAL ROOT, LUMBAR, GFAP SS; GANGLION, DORSAL ROOT, LUMBAR, IBA-1 SS; GANGLION, DORSAL ROOT, THORACIC; GANGLION, TRIGEMINAL; HEART; LYMPH NODE, CERVICAL; NERVE, OPTIC; NERVE ROOT, DORSAL, CERVICAL; NERVE ROOT, DORSAL, LUMBAR, FLUOROJADE B SS; NERVE ROOT, DORSAL, THORACIC; NERVE ROOT, VENTRAL, CERVICAL; NERVE ROOT, VENTRAL, LUMBAR; NERVE ROOT, VENTRAL, LUMBAR FLUOROJADE B SS; NERVE ROOT, VENTRAL, LUMBAR, GFAP SS; NERVE ROOT, VENTRAL, LUMBAR, IBA-1 SS; NERVE ROOT, VENTRAL, THORACIC; SITE, INJECTION, FLUOROJADE B SS; SPINAL CORD, LUMBAR, GFAP SS

**Histopathology - The following Tissues were Not Examined:**

SPLEEN - Not Present In Wet Tissues.

**Appendix 13**  
**Appendix 4****Individual Macroscopic and Microscopic Pathology****5550014**

|                 |                                     |             |
|-----------------|-------------------------------------|-------------|
| Animal: 2702    | Group: 2                            | Sex: Female |
| Species: Monkey | Strain: Cyno Vietnam                |             |
|                 | Dose: 8.4 X10E13 vg                 |             |
|                 | Removal Reason: Terminal Euthanasia |             |
|                 | Study Day (Week) of Death: 94 (14)  |             |

**Gross Pathology Animal Details:**

No animal details found

**Gross Pathology Observations [Correlation]:**

GLAND, THYROID : Cyst, pale : (Comment) 2, right  
 LIVER : Focus, pale : (Comment) 1, medial right (TGL)  
 MUSCLE, BICEPS FEMORIS : Swelling : (Comment) bilateral, extending into sciatic nerve (TGL)  
 OVARY : Cyst, pale : (Comment) 1, left  
 SUBCUTIS : Focus, dark : (Comment) >10, lumbar  
 THYMUS : Small

Any remaining study plan required tissues, which have been examined, have no visible lesions

**Gross Pathology - The following Tissues were Not Examined:**

None

**Histopathology Animal Details:**

No animal details found

**Histopathology Observations [Correlation]:**

BRAIN : Infiltration, mononuclear cell; mild, meninges  
 GANGLION, DORSAL ROOT, LUMBAR : Infiltration, mononuclear cell; minimal  
 GANGLION, DORSAL ROOT, LUMBAR, IBA-1 SS : Intensity, increased; minimal  
 LYMPH NODE, CERVICAL : (Note) One Of A Pair Available For Evaluation.  
 LYMPH NODE, CERVICAL : Cellularity, decreased; lymphoid, minimal  
 LYMPH NODE, ILIAC : Erythrocytosis; minimal : (Comment) with pigment  
 LYMPH NODE, ILIAC : Sinus histiocytosis; minimal  
 MUSCLE, BICEPS FEMORIS : Edema; mild [MUSCLE, BICEPS FEMORIS : Swelling : (Comment) bilateral, extending into sciatic nerve (G)]  
 MUSCLE, BICEPS FEMORIS : Fibrosis; minimal  
 MUSCLE, BICEPS FEMORIS : Degeneration/atrophy; mild, myofiber  
 MUSCLE, BICEPS FEMORIS : Necrosis/inflammation; mild  
 NERVE, SCIATIC : Degeneration; axonal, mild  
 NERVE, SCIATIC : Edema; mild : (Comment) with vacuolated macrophages and mixed cell infiltrates  
 NERVE, SURAL : Degeneration; axonal, minimal  
 NERVE, SURAL : Edema; mild : (Comment) with vacuolated macrophages  
 NERVE, TIBIAL : Degeneration; axonal, mild  
 NERVE, TIBIAL : Edema; mild : (Comment) with vacuolated macrophages and mixed cell infiltrates  
 NERVE ROOT, DORSAL, LUMBAR, GFAP SS : Intensity, increased; minimal  
 NERVE ROOT, DORSAL, LUMBAR, IBA-1 SS : Intensity, increased; minimal  
 SITE, INJECTION, FLUOROJADE B SS : Degeneration; axonal, minimal, dorsal funiculus  
 SITE, INJECTION, GFAP - IHC SS : Intensity, increased; minimal, cauda equina  
 SITE, INJECTION, IBA-1 - IHC SS : Intensity, increased; minimal, cauda equina

**Appendix 13**  
**Appendix 4****Individual Macroscopic and Microscopic Pathology****5550014**

---

|                          |          |             |
|--------------------------|----------|-------------|
| Animal: 2702 (Continued) | Group: 2 | Sex: Female |
|--------------------------|----------|-------------|

---

**Histopathology Observations [Correlation] (Continued):**

SPINAL CORD, LUMBAR, FLUOROJADE B SS : Degeneration; axonal, minimal, dorsal funiculus  
NO CORRELATE : No correlating lesion [LIVER : Focus, pale : (Comment) 1, medial right (G)]

**Histopathology - The following Tissues were Within Normal Limits:**

GANGLION, DORSAL ROOT, CERVICAL; GANGLION, DORSAL ROOT, LUMBAR, FLUOROJADE B SS; GANGLION, DORSAL ROOT, LUMBAR, GFAP SS; GANGLION, DORSAL ROOT, THORACIC; GANGLION, TRIGEMINAL; HEART; KIDNEY; LIVER; MUSCLE, GASTROCNEMIUS; NERVE, OPTIC; NERVE ROOT, DORSAL, CERVICAL; NERVE ROOT, DORSAL, LUMBAR; NERVE ROOT, DORSAL, LUMBAR, FLUOROJADE B SS; NERVE ROOT, DORSAL, THORACIC; NERVE ROOT, VENTRAL, CERVICAL; NERVE ROOT, VENTRAL, LUMBAR; NERVE ROOT, VENTRAL, LUMBAR FLUOROJADE B SS; NERVE ROOT, VENTRAL, LUMBAR, GFAP SS; NERVE ROOT, VENTRAL, LUMBAR, IBA-1 SS; NERVE ROOT, VENTRAL, THORACIC; SITE, INJECTION; SPINAL CORD, CERVICAL; SPINAL CORD, LUMBAR; SPINAL CORD, LUMBAR, GFAP SS; SPINAL CORD, LUMBAR, IBA-1 SS; SPINAL CORD, THORACIC; SPLEEN

**Histopathology - The following Tissues were Not Examined:**

None

**Appendix 13****Appendix 4****Individual Macroscopic and Microscopic Pathology****5550014**

|                 |                                     |           |
|-----------------|-------------------------------------|-----------|
| Animal: 3201    | Group: 3                            | Sex: Male |
| Species: Monkey | Strain: Cyno Vietnam                |           |
|                 | Dose: 1.68 X10E14 vg                |           |
|                 | Removal Reason: Terminal Euthanasia |           |
|                 | Study Day (Week) of Death: 94 (14)  |           |

**Gross Pathology Animal Details:**

No animal details found

**Gross Pathology Observations [Correlation]:**

EPIDIDYMIS : Small : (Comment) bilateral  
 LUNG : Focus, pale : (Comment) 3 to >10  
 MUSCLE, BICEPS FEMORIS : Focus, dark : (Comment) 1, left (TGL)  
 MUSCLE, BICEPS FEMORIS : Thick : (Comment) bilateral (TGL)  
 MUSCLE, BICEPS FEMORIS : Focus, pale : (Comment) 3, right (TGL)  
 TESTIS : Small : (Comment) bilateral  
 THYMUS : Small

Any remaining study plan required tissues, which have been examined, have no visible lesions

**Gross Pathology - The following Tissues were Not Examined:**

None

**Histopathology Animal Details:**

No animal details found

**Histopathology Observations [Correlation]:**

BRAIN : Degeneration; axonal, minimal, medulla oblongata  
 BRAIN : Infiltration, mononuclear cell; perivascular, minimal  
 BRAIN : Infiltration, mononuclear cell; minimal, meninges  
 GANGLION, DORSAL ROOT, LUMBAR : Infiltration, mononuclear cell; minimal  
 GANGLION, DORSAL ROOT, LUMBAR : Degeneration; neuronal, minimal  
 GANGLION, TRIGEMINAL : Infiltration, mononuclear cell; minimal  
 GANGLION, TRIGEMINAL : Degeneration; axonal, minimal  
 LYMPH NODE, CERVICAL : Cellularity, decreased; lymphoid, minimal  
 LYMPH NODE, CERVICAL : Sinus histiocytosis; minimal  
 LYMPH NODE, ILIAC : Erythrocytosis; minimal  
 LYMPH NODE, ILIAC : Cellularity, decreased; lymphoid, mild  
 LYMPH NODE, ILIAC : Sinus histiocytosis; mild  
 MUSCLE, BICEPS FEMORIS : Edema; moderate [MUSCLE, BICEPS FEMORIS : Thick : (Comment) bilateral (G)]  
 MUSCLE, BICEPS FEMORIS : Fibrosis; minimal : (Comment) with myofiber atrophy [MUSCLE, BICEPS FEMORIS : Focus, pale : (Comment) 3, right (G)]  
 MUSCLE, BICEPS FEMORIS : Degeneration/atrophy; moderate, myofiber : (Comment) with regeneration  
 MUSCLE, BICEPS FEMORIS : Necrosis/inflammation; mild : (Comment) with hemorrhage [MUSCLE, BICEPS FEMORIS : Focus, dark : (Comment) 1, left (G) | MUSCLE, BICEPS FEMORIS : Focus, pale : (Comment) 3, right (G)]  
 NERVE, SCIATIC : Degeneration; axonal, mild  
 NERVE, SCIATIC : Edema; mild : (Comment) with vacuolated macrophages and mixed cell infiltrates

**Appendix 13****Appendix 4****Individual Macroscopic and Microscopic Pathology****5550014**

|                          |          |           |
|--------------------------|----------|-----------|
| Animal: 3201 (Continued) | Group: 3 | Sex: Male |
|--------------------------|----------|-----------|

**Histopathology Observations [Correlation] (Continued):**

NERVE, SURAL : Degeneration; axonal, mild  
 NERVE, SURAL : Edema; mild : (Comment) with vacuolated macrophages and mixed cell infiltrates  
 NERVE, TIBIAL : Degeneration; axonal, mild  
 NERVE, TIBIAL : Edema; mild : (Comment) with vacuolated macrophages and mixed cell infiltrates  
 NERVE ROOT, DORSAL, LUMBAR : Degeneration; axonal, minimal  
 NERVE ROOT, DORSAL, LUMBAR, FLUOROJADE B SS : Degeneration; axonal, minimal  
 NERVE ROOT, DORSAL, LUMBAR, GFAP SS : Intensity, increased; minimal  
 NERVE ROOT, DORSAL, THORACIC : (Note) One Of A Pair Available For Evaluation.  
 NERVE ROOT, DORSAL, THORACIC : Infiltration, mononuclear cell; minimal  
 SITE, INJECTION : Degeneration; axonal, marked, cauda equina  
 SITE, INJECTION : Degeneration; axonal, minimal, dorsal funiculus  
 SITE, INJECTION : Vacuolation; perivascular, mild, macrophage  
 SITE, INJECTION, FLUOROJADE B SS : Degeneration; axonal, moderate, cauda equina  
 SITE, INJECTION, FLUOROJADE B SS : Degeneration; axonal, minimal, dorsal funiculus  
 SITE, INJECTION, GFAP - IHC SS : Intensity, increased; moderate, cauda equina  
 SITE, INJECTION, GFAP - IHC SS : Intensity, increased; minimal, dorsal funiculus  
 SITE, INJECTION, IBA-1 - IHC SS : Intensity, increased; moderate, cauda equina  
 SITE, INJECTION, IBA-1 - IHC SS : Intensity, increased; minimal, dorsal funiculus  
 SPINAL CORD, CERVICAL : Degeneration; axonal, mild, dorsal funiculus  
 SPINAL CORD, LUMBAR : Degeneration; axonal, moderate, dorsal funiculus  
 SPINAL CORD, LUMBAR, FLUOROJADE B SS : Degeneration; axonal, moderate, dorsal funiculus  
 SPINAL CORD, LUMBAR, GFAP SS : Intensity, increased; mild, dorsal funiculus  
 SPINAL CORD, LUMBAR, IBA-1 SS : Intensity, increased; moderate, dorsal funiculus  
 SPINAL CORD, THORACIC : Degeneration; axonal, moderate, dorsal funiculus  
 SPLEEN : Cellularity, decreased; lymphoid, minimal

**Histopathology - The following Tissues were Within Normal Limits:**

GANGLION, DORSAL ROOT, CERVICAL; GANGLION, DORSAL ROOT, LUMBAR, FLUOROJADE B SS; GANGLION, DORSAL ROOT, LUMBAR, GFAP SS; GANGLION, DORSAL ROOT, LUMBAR, IBA-1 SS; GANGLION, DORSAL ROOT, THORACIC; HEART; KIDNEY; LIVER; MUSCLE, GASTROCNEMIUS; NERVE, OPTIC; NERVE ROOT, DORSAL, CERVICAL; NERVE ROOT, DORSAL, LUMBAR, IBA-1 SS; NERVE ROOT, VENTRAL, CERVICAL; NERVE ROOT, VENTRAL, LUMBAR; NERVE ROOT, VENTRAL, LUMBAR FLUOROJADE B SS; NERVE ROOT, VENTRAL, LUMBAR, GFAP SS; NERVE ROOT, VENTRAL, LUMBAR, IBA-1 SS; NERVE ROOT, VENTRAL, THORACIC

**Histopathology - The following Tissues were Not Examined:**

None

## Appendix 13

### Appendix 4

#### Individual Macroscopic and Microscopic Pathology

##### 5550014

|                 |                                     |             |
|-----------------|-------------------------------------|-------------|
| Animal: 3701    | Group: 3                            | Sex: Female |
| Species: Monkey | Strain: Cyno Vietnam                |             |
|                 | Dose: 1.68 X10E14 vg                |             |
|                 | Removal Reason: Terminal Euthanasia |             |
|                 | Study Day (Week) of Death: 94 (14)  |             |

#### Gross Pathology Animal Details:

No animal details found

#### Gross Pathology Observations [Correlation]:

LYMPH NODE, ILIAC : Discoloration, mottled : (Comment) right (TGL)  
 MUSCLE, BICEPS FEMORIS : Focus, dark : (Comment) 3, right (TGL)  
 MUSCLE, BICEPS FEMORIS : Swelling : (Comment) extending into sciatic nerve, left (TGL)  
 MUSCLE, BICEPS FEMORIS : Thick : (Comment) right (TGL)  
 MUSCLE, BICEPS FEMORIS : Focus, pale : (Comment) >10, right (TGL)  
 THYMUS : Small

Any remaining study plan required tissues, which have been examined, have no visible lesions

#### Gross Pathology - The following Tissues were Not Examined:

None

#### Histopathology Animal Details:

No animal details found

#### Histopathology Observations [Correlation]:

BRAIN : Infiltration, mononuclear cell; perivascular, minimal  
 BRAIN : Infiltration, mononuclear cell; minimal, meninges  
 GANGLION, DORSAL ROOT, LUMBAR : Infiltration, mononuclear cell; minimal  
 GANGLION, DORSAL ROOT, LUMBAR : Degeneration; neuronal, minimal  
 GANGLION, DORSAL ROOT, LUMBAR, IBA-1 SS : Intensity, increased; minimal  
 HEART : Infiltration, mononuclear cell; minimal : (Comment) with rare degenerated myocytes  
 LYMPH NODE, CERVICAL : Cellularity, decreased; lymphoid, minimal  
 LYMPH NODE, ILIAC : Erythrocytosis; mild [LYMPH NODE, ILIAC : Discoloration, mottled : (Comment) right (G)]  
 LYMPH NODE, ILIAC : Cellularity, decreased; lymphoid, minimal  
 LYMPH NODE, ILIAC : Sinus histiocytosis; mild  
 MUSCLE, BICEPS FEMORIS : Edema; marked [MUSCLE, BICEPS FEMORIS : Swelling : (Comment) extending into sciatic nerve, left (G) | MUSCLE, BICEPS FEMORIS : Thick : (Comment) right (G)]  
 MUSCLE, BICEPS FEMORIS : Fibrosis; minimal : (Comment) with myofiber atrophy [MUSCLE, BICEPS FEMORIS : Focus, pale : (Comment) >10, right (G)]  
 MUSCLE, BICEPS FEMORIS : Degeneration/atrophy; moderate, myofiber : (Comment) with regeneration  
 MUSCLE, BICEPS FEMORIS : Necrosis/inflammation; marked : (Comment) with hemorrhage [MUSCLE, BICEPS FEMORIS : Focus, dark : (Comment) 3, right (G) | MUSCLE, BICEPS FEMORIS : Focus, pale : (Comment) >10, right (G)]  
 NERVE, SCIATIC : Degeneration; axonal, moderate  
 NERVE, SCIATIC : Edema; minimal : (Comment) with vacuolated macrophages and mixed cell infiltrates  
 NERVE, SURAL : Degeneration; axonal, mild  
 NERVE, SURAL : Edema; minimal : (Comment) with vacuolated macrophages

**Appendix 13**  
**Appendix 4****Individual Macroscopic and Microscopic Pathology****5550014**

|                          |          |             |
|--------------------------|----------|-------------|
| Animal: 3701 (Continued) | Group: 3 | Sex: Female |
|--------------------------|----------|-------------|

**Histopathology Observations [Correlation] (Continued):**

NERVE, TIBIAL : Degeneration; axonal, mild  
 NERVE, TIBIAL : Edema; minimal : (Comment) with vacuolated macrophages and mixed cell infiltrates  
 NERVE ROOT, DORSAL, LUMBAR : Degeneration; axonal, minimal  
 NERVE ROOT, DORSAL, LUMBAR : Infiltration, mononuclear cell; minimal  
 NERVE ROOT, DORSAL, LUMBAR, FLUOROJADE B SS : Degeneration; axonal, minimal  
 NERVE ROOT, DORSAL, LUMBAR, GFAP SS : Intensity, increased; minimal  
 NERVE ROOT, DORSAL, LUMBAR, IBA-1 SS : Intensity, increased; minimal  
 NERVE ROOT, VENTRAL, LUMBAR, GFAP SS : (Note) One Of A Pair Available For Evaluation.  
 SITE, INJECTION : Infiltration, mononuclear cell; perivascular, minimal  
 SITE, INJECTION : Degeneration; axonal, moderate, cauda equina  
 SITE, INJECTION, FLUOROJADE B SS : Degeneration; axonal, moderate, cauda equina  
 SITE, INJECTION, GFAP - IHC SS : Intensity, increased; moderate, cauda equina  
 SITE, INJECTION, IBA-1 - IHC SS : Intensity, increased; moderate, cauda equina  
 SITE, INJECTION, IBA-1 - IHC SS : Intensity, increased; minimal, dorsal funiculus  
 SPINAL CORD, CERVICAL : Degeneration; axonal, mild, dorsal funiculus  
 SPINAL CORD, LUMBAR : Degeneration; axonal, mild, dorsal funiculus  
 SPINAL CORD, LUMBAR, FLUOROJADE B SS : Degeneration; axonal, mild, dorsal funiculus  
 SPINAL CORD, LUMBAR, FLUOROJADE B SS : Degeneration; axonal, minimal, lateral funiculus  
 SPINAL CORD, LUMBAR, FLUOROJADE B SS : Degeneration; axonal, minimal, ventral funiculus  
 SPINAL CORD, LUMBAR, IBA-1 SS : Intensity, increased; mild, dorsal funiculus  
 SPINAL CORD, THORACIC : Degeneration; axonal, mild, dorsal funiculus  
 SPLEEN : Cellularity, decreased; lymphoid, mild

**Histopathology - The following Tissues were Within Normal Limits:**

GANGLION, DORSAL ROOT, CERVICAL; GANGLION, DORSAL ROOT, LUMBAR, FLUOROJADE B SS; GANGLION, DORSAL ROOT, LUMBAR, GFAP SS; GANGLION, DORSAL ROOT, THORACIC; GANGLION, TRIGEMINAL; KIDNEY; LIVER; MUSCLE, GASTROCNEMIUS; NERVE, OPTIC; NERVE ROOT, DORSAL, CERVICAL; NERVE ROOT, DORSAL, THORACIC; NERVE ROOT, VENTRAL, CERVICAL; NERVE ROOT, VENTRAL, LUMBAR; NERVE ROOT, VENTRAL, LUMBAR FLUOROJADE B SS; NERVE ROOT, VENTRAL, LUMBAR, GFAP SS; NERVE ROOT, VENTRAL, LUMBAR, IBA-1 SS; NERVE ROOT, VENTRAL, THORACIC; SPINAL CORD, LUMBAR, GFAP SS

**Histopathology - The following Tissues were Not Examined:**

None

Sponsor Reference No. UTSW-Gray-SPG50-004

Test Facility Study No. 5550014

**Appendix 13****Appendix 5****PATHOLOGY  
ORGAN WEIGHT HISTORICAL DATA**

**Species / Strain:** Monkey / Cyno Cambodian, Cyno China, Cyno Mauritius Island  
**Age at Necropsy:** Males: From 1.5 to 6.1 years - Females: From 1.5 to 6.1 years  
**Treatment Duration:** Males: 4 weeks - Females: 4 weeks  
**Route of Admin:** All routes

| Organ                            | Unit | N  | Mean   | Males  |                 | N  | Mean   | Females |                 |
|----------------------------------|------|----|--------|--------|-----------------|----|--------|---------|-----------------|
|                                  |      |    |        | S.D.   | Range*          |    |        | S.D.    | Range*          |
| Bodyweight                       | kg   | 78 | 2.6    | 0.6    | 1.8 - 4.6       | 81 | 2.5    | 0.3     | 2.1 - 3.1       |
| Brain Weight                     | g    | 80 | 68.883 | 5.708  | 58.442 - 82.574 | 81 | 63.623 | 4.924   | 53.962 - 72.361 |
| Epididymis Weight                | g    | 67 | 0.515  | 0.233  | 0.232 - 1.115   |    |        |         |                 |
| Gland Prostate/Seminal Vesicle   | g    | 3  | 1.999  | 1.699  | 0.750 - 3.933   |    |        |         |                 |
| Gland, Adrenal Weight            | g    | 80 | 0.460  | 0.158  | 0.272 - 0.930   | 80 | 0.451  | 0.103   | 0.269 - 0.716   |
| Gland, Pituitary Weight          | g    | 71 | 0.035  | 0.010  | 0.017 - 0.056   | 72 | 0.043  | 0.011   | 0.022 - 0.070   |
| Gland, Prostate Weight           | g    | 76 | 0.225  | 0.340  | 0.051 - 1.760   |    |        |         |                 |
| Gland, Salivary Weight           | g    | 3  | 1.493  | 0.321  | 1.160 - 1.800   | 3  | 1.536  | 0.165   | 1.410 - 1.723   |
| Gland, Seminal Vesicle Weight    | g    | 3  | 0.479  | 0.173  | 0.321 - 0.664   |    |        |         |                 |
| Gland, Thyroid Weight            | g    | 68 | 0.327  | 0.137  | 0.148 - 0.798   | 69 | 0.316  | 0.088   | 0.144 - 0.540   |
| Gland, Thyroid/Parathyroid Weigh | g    | 3  | 0.365  | 0.100  | 0.250 - 0.429   | 3  | 0.335  | 0.021   | 0.313 - 0.355   |
| Heart Weight                     | g    | 78 | 9.948  | 2.040  | 7.518 - 17.920  | 81 | 9.474  | 1.623   | 7.260 - 13.560  |
| Kidney Weight                    | g    | 79 | 11.363 | 2.476  | 8.485 - 20.790  | 81 | 10.913 | 1.752   | 8.515 - 14.508  |
| Liver Weight                     | g    | 76 | 51.557 | 11.377 | 37.258 - 97.770 | 78 | 50.231 | 7.041   | 36.137 - 75.144 |
| Liver/Gallbladder Weight         | g    | 3  | 44.352 | 2.287  | 41.717 - 45.826 | 3  | 42.211 | 6.284   | 37.713 - 49.391 |
| Lung Weight                      | g    | 33 | 12.158 | 1.858  | 6.559 - 14.955  | 32 | 12.161 | 1.347   | 9.402 - 14.708  |
| Ovary Weight                     | g    |    |        |        |                 | 80 | 0.238  | 0.102   | 0.083 - 0.453   |
| Pancreas Weight                  | g    | 3  | 4.172  | 0.882  | 3.203 - 4.928   | 3  | 4.180  | 1.158   | 3.077 - 5.386   |
| Spleen Weight                    | g    | 71 | 3.497  | 1.649  | 1.445 - 8.379   | 72 | 3.340  | 1.365   | 1.629 - 7.751   |
| Testis Weight                    | g    | 78 | 1.806  | 4.570  | 0.455 - 19.847  |    |        |         |                 |
| Thymus Weight                    | g    | 77 | 2.745  | 1.189  | 0.313 - 5.558   | 78 | 2.165  | 1.095   | 0.257 - 4.806   |
| Uterus Weight                    | g    |    |        |        |                 | 63 | 3.510  | 2.005   | 0.445 - 7.394   |
| Uterus/Cervix                    | g    |    |        |        |                 | 3  | 2.924  | 0.731   | 2.087 - 3.435   |

\* N &lt; 20: Lowest to highest; N &gt; or equal 20: 2.5-97.5th percentile.

Test Facility Study No. 5550014

Sponsor Reference No. UTSW-Gray-SPG50-004

Sponsor Reference No. UTSW-Gray-SPG50-004

Test Facility Study No. 5550014

**Appendix 13****Appendix 5**

**PATHOLOGY**  
**ORGAN WEIGHT HISTORICAL DATA**  
 Relative to Bodyweight as percentage

**Species / Strain:** Monkey / Cyno Cambodian, Cyno China, Cyno Mauritius Island  
**Age at Necropsy:** Males: From 1.5 to 6.1 years - Females: From 1.5 to 6.1 years  
**Treatment Duration:** Males: 4 weeks - Females: 4 weeks  
**Route of Admin:** All routes

| Organ                            | Unit | N  | Mean    | Males   |                   | N  | Mean    | Females |                   |
|----------------------------------|------|----|---------|---------|-------------------|----|---------|---------|-------------------|
|                                  |      |    |         | S.D.    | Range*            |    |         | S.D.    | Range*            |
| Brain Weight                     | g    | 80 | 2.67713 | 0.58666 | 0.98716 - 3.92589 | 81 | 2.53588 | 0.29948 | 1.98630 - 3.23360 |
| Epididymis Weight                | g    | 68 | 0.02070 | 0.00880 | 0.01060 - 0.04839 |    |         |         |                   |
| Gland Prostate/Seminal Vesicle   | g    | 3  | 0.07224 | 0.06870 | 0.02679 - 0.15127 |    |         |         |                   |
| Gland, Adrenal Weight            | g    | 80 | 0.01723 | 0.00493 | 0.01030 - 0.03017 | 81 | 0.01801 | 0.00379 | 0.01188 - 0.02508 |
| Gland, Pituitary Weight          | g    | 71 | 0.00138 | 0.00036 | 0.00071 - 0.00224 | 72 | 0.00173 | 0.00044 | 0.00110 - 0.00292 |
| Gland, Prostate Weight           | g    | 75 | 0.00666 | 0.00456 | 0.00212 - 0.02047 |    |         |         |                   |
| Gland, Salivary Weight           | g    | 3  | 0.06447 | 0.01678 | 0.04833 - 0.08182 | 3  | 0.06145 | 0.00660 | 0.05640 - 0.06892 |
| Gland, Seminal Vesicle Weight    | g    | 3  | 0.02038 | 0.00667 | 0.01459 - 0.02767 |    |         |         |                   |
| Gland, Thyroid Weight            | g    | 68 | 0.01279 | 0.00492 | 0.00548 - 0.02645 | 69 | 0.01268 | 0.00366 | 0.00519 - 0.02160 |
| Gland, Thyroid/Parathyroid Weigh | g    | 3  | 0.01484 | 0.00424 | 0.01000 - 0.01788 | 3  | 0.01501 | 0.00091 | 0.01423 - 0.01600 |
| Heart Weight                     | g    | 80 | 0.38243 | 0.03990 | 0.31540 - 0.46551 | 81 | 0.37315 | 0.03957 | 0.30796 - 0.46735 |
| Kidney Weight                    | g    | 80 | 0.43124 | 0.05830 | 0.32692 - 0.55501 | 81 | 0.43030 | 0.04459 | 0.34974 - 0.51068 |
| Liver Weight                     | g    | 77 | 1.94408 | 0.22426 | 1.29477 - 2.35589 | 78 | 1.97421 | 0.17383 | 1.66318 - 2.42400 |
| Liver/Gallbladder Weight         | g    | 3  | 1.79954 | 0.12173 | 1.66868 - 1.90942 | 3  | 1.88486 | 0.17188 | 1.71423 - 2.05796 |
| Lung Weight                      | g    | 33 | 0.47227 | 0.04360 | 0.40120 - 0.57161 | 32 | 0.49469 | 0.04676 | 0.39500 - 0.62452 |
| Ovary Weight                     | g    |    |         |         |                   | 80 | 0.00933 | 0.00379 | 0.00332 - 0.01865 |
| Pancreas Weight                  | g    | 3  | 0.18006 | 0.04533 | 0.13346 - 0.22400 | 3  | 0.16720 | 0.04632 | 0.12308 - 0.21544 |
| Spleen Weight                    | g    | 71 | 0.13552 | 0.05261 | 0.06569 - 0.28893 | 72 | 0.13207 | 0.04537 | 0.07028 - 0.26439 |
| Testis Weight                    | g    | 77 | 0.04797 | 0.04721 | 0.01788 - 0.10671 |    |         |         |                   |
| Thymus Weight                    | g    | 77 | 0.10816 | 0.04605 | 0.00398 - 0.20585 | 78 | 0.08671 | 0.04443 | 0.00857 - 0.20896 |
| Uterus Weight                    | g    |    |         |         |                   | 63 | 0.13795 | 0.07541 | 0.02225 - 0.29448 |
| Uterus/Cervix                    | g    |    |         |         |                   | 3  | 0.13093 | 0.03178 | 0.09486 - 0.15481 |

\* N < 20: Lowest to highest; N > or equal 20: 2.5-97.5th percentile.

Test Facility Study No. 5550014

Sponsor Reference No. UTSW-Gray-SPG50-004

Sponsor Reference No. UTSW-Gray-SPG50-004

Test Facility Study No. 5550014

**Appendix 13****Appendix 5**

**PATHOLOGY**  
**ORGAN WEIGHT HISTORICAL DATA**  
 Relative to Brain Weight as percentage

**Species / Strain:** Monkey / Cyno Cambodian, Cyno China, Cyno Mauritius Island  
**Age at Necropsy:** Males: From 1.5 to 6.1 years - Females: From 1.5 to 6.1 years  
**Treatment Duration:** Males: 4 weeks - Females: 4 weeks  
**Route of Admin:** All routes

| Organ                            | Unit | N  | Mean     | Males    |                      | N  | Mean     | Females  |                      |
|----------------------------------|------|----|----------|----------|----------------------|----|----------|----------|----------------------|
|                                  |      |    |          | S.D.     | Range*               |    |          | S.D.     | Range*               |
| Epididymis Weight                | g    | 67 | 0.75817  | 0.36290  | 0.30217 - 1.53638    |    |          |          |                      |
| Gland Prostate/Seminal Vesicle   | g    | 3  | 3.00374  | 2.61488  | 1.15390 - 5.99534    |    |          |          |                      |
| Gland, Adrenal Weight            | g    | 80 | 0.67071  | 0.22771  | 0.39625 - 1.28630    | 81 | 0.72000  | 0.18052  | 0.43420 - 1.15595    |
| Gland, Pituitary Weight          | g    | 71 | 0.05147  | 0.01523  | 0.02288 - 0.08438    | 72 | 0.06802  | 0.01852  | 0.03733 - 0.11678    |
| Gland, Prostate Weight           | g    | 76 | 0.32302  | 0.46826  | 0.06867 - 2.55595    |    |          |          |                      |
| Gland, Salivary Weight           | g    | 3  | 2.02790  | 0.34014  | 1.63671 - 2.25383    | 3  | 2.46700  | 0.23973  | 2.26443 - 2.73167    |
| Gland, Seminal Vesicle Weight    | g    | 3  | 0.67205  | 0.29874  | 0.39112 - 0.98587    |    |          |          |                      |
| Gland, Thyroid Weight            | g    | 68 | 0.47429  | 0.19022  | 0.21910 - 1.07874    | 69 | 0.49908  | 0.14236  | 0.20683 - 0.85626    |
| Gland, Thyroid/Parathyroid Weigh | g    | 3  | 0.53017  | 0.15292  | 0.36524 - 0.66724    | 3  | 0.51493  | 0.04359  | 0.47754 - 0.56280    |
| Heart Weight                     | g    | 78 | 14.48705 | 2.85160  | 10.00073 - 24.22440  | 81 | 14.92849 | 2.54550  | 11.77709 - 20.55440  |
| Kidney Weight                    | g    | 79 | 16.55495 | 3.55860  | 12.38969 - 29.31125  | 81 | 17.22306 | 2.86043  | 12.45684 - 24.27687  |
| Liver Weight                     | g    | 76 | 75.05616 | 16.03733 | 54.12575 - 132.16627 | 77 | 78.67667 | 10.02926 | 56.22947 - 102.67506 |
| Liver/Gallbladder Weight         | g    | 3  | 64.57552 | 7.83566  | 55.95917 - 71.27459  | 3  | 64.64508 | 6.46708  | 57.53845 - 70.18459  |
| Lung Weight                      | g    | 33 | 17.74072 | 2.66328  | 9.54383 - 22.65321   | 32 | 18.95269 | 2.58800  | 14.00056 - 24.90230  |
| Ovary Weight                     | g    |    |          |          |                      | 80 | 0.37800  | 0.16930  | 0.13019 - 0.76701    |
| Pancreas Weight                  | g    | 3  | 5.64902  | 0.77909  | 4.75561 - 6.18704    | 3  | 6.68067  | 1.68626  | 5.24817 - 8.53904    |
| Spleen Weight                    | g    | 71 | 5.09425  | 2.39420  | 2.10770 - 12.58939   | 72 | 5.26568  | 2.20328  | 2.55322 - 12.21919   |
| Testis Weight                    | g    | 78 | 2.54940  | 6.01964  | 0.62809 - 26.82933   |    |          |          |                      |
| Thymus Weight                    | g    | 77 | 4.02400  | 1.80615  | 0.45455 - 8.62976    | 78 | 3.38226  | 1.68433  | 0.42585 - 7.92520    |
| Uterus Weight                    | g    |    |          |          |                      | 63 | 5.53916  | 3.23654  | 0.76918 - 12.31253   |
| Uterus/Cervix                    | g    |    |          |          |                      | 3  | 4.50354  | 1.17697  | 3.18412 - 5.44538    |

\* N < 20: Lowest to highest; N > or equal 20: 2.5-97.5th percentile.

Test Facility Study No. 5550014

Sponsor Reference No. UTSW-Gray-SPG50-004

**Appendix 13**

**SIGNATURE(S) FOR DOCUMENT: 5550014 - 5550014 Pathology Final Report**

|                                         |                                                                                   |                                  |  |
|-----------------------------------------|-----------------------------------------------------------------------------------|----------------------------------|--|
| <b><u>Individual<br/>Scientist:</u></b> | I approve this document.                                                          |                                  |  |
| Name:                                   | <b>Debien, Elaine</b>                                                             |                                  |  |
|                                         | 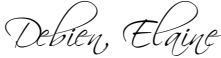 |                                  |  |
|                                         |                                                                                   | 03-Mar-2022 15:30:36 (UTC+00:00) |  |
| Electronically Signed in                |  | Timestamp                        |  |

**Appendix 14****PATHOLOGY PEER REVIEW CERTIFICATE****5550014****A Single-Dose Study of AAV9/AP4M1 by Intrathecal Injection in Immunosuppressed Monkeys****1. PURPOSE:**

The purpose of this pathology peer review was to assess the overall quality and consistency of the microscopic data and determine the validity of the study pathologist's conclusions.

A pathology peer review for this study was performed as follows for this study:

**2. MATERIALS AND METHODS:**

| Group No. | Test Material  | Dose Level (vg)       | Dose Volume (mL) | Dose Concentration (vg/mL) | No. of Animals |         |
|-----------|----------------|-----------------------|------------------|----------------------------|----------------|---------|
|           |                |                       |                  |                            | Main Study     |         |
|           |                |                       |                  |                            | Males          | Females |
| 1         | Reference Item | 0                     | 1                | 0                          | 1              | 1       |
| 2         | AAV9/AP4M1     | $8.4 \times 10^{13}$  | 1.55             | $5.43 \times 10^{13}$      | -              | 2       |
| 3         | AAV9/AP4M1     | $1.68 \times 10^{14}$ | 3.10             | $5.43 \times 10^{13}$      | 1              | 1       |

1. Review of study plan and amendments, pathology report, histology records, clinical observations, organ weight data, clinical pathology data, etc.
2. Review of all tissues from the Males and Females in Groups 1 and 3 including animal numbers: 1201, 1701, 3201 and 3701, and Test-Item-target tissues (listed below) from the Females in Group 2 including animal numbers 2701 and 2702. Review included sections stained with hematoxylin and eosin (H&E), Fluoro-Jade B, IBA-1 and GFAP.
3. Review of all target organs from all animals in all groups to verify the effect levels (spinal cord (all segments, including the injection site), lumbar DRG, lumbar and thoracic dorsal nerve roots, brain, trigeminal ganglion, and peripheral nerves (sciatic, sural, and tibial)).

**Appendix 14**

**3. RESULTS**

Following review of the microscopic findings reported by the study pathologist, any differences of opinion were resolved and agreement on terminology and diagnoses was achieved. The pathology report and histopathology tables accurately reflect the observations and conclusions agreed upon by the peer review pathologist.

All electronic signatures appear at the end of the document upon finalization.

**Appendix 14**

**SIGNATURE(S) FOR DOCUMENT: 5550014 - 5550014 Pathology Final Report Peer Review**

**Individual  
Scientist:**

I approve this document.

Name:

**Lambert, Andre-Jean**

*Lambert, Andre-Jean*

03-Mar-2022 14:58:35 (UTC+00:00)

Electronically Signed in

**M-Files**

Timestamp

**SIGNATURE(S) FOR DOCUMENT: 5550014 General Toxicology Final Report**

|                                                                                       |                                  |
|---------------------------------------------------------------------------------------|----------------------------------|
| <b><u>QA Approval:</u></b> I approve the Quality Assurance Statement for this report. |                                  |
| Name: <b>Huang, Bo</b>                                                                |                                  |
| 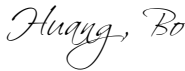     |                                  |
| <hr/>                                                                                 |                                  |
| Electronically Signed in                                                              | Timestamp                        |
| 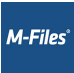     | 07-Mar-2022 16:45:19 (UTC+00:00) |

|                                                                                     |                                  |
|-------------------------------------------------------------------------------------|----------------------------------|
| <b><u>Study Director Approval:</u></b> I approve this Report.                       |                                  |
| Name: <b>Cinquino, Stefania</b>                                                     |                                  |
| 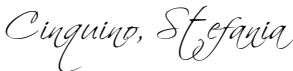  |                                  |
| <hr/>                                                                               |                                  |
| Electronically Signed in                                                            | Timestamp                        |
| 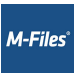 | 07-Mar-2022 18:12:40 (UTC+00:00) |
